# Supplementary material for: Rapidly Evolving Genes and Stress Adaptation of Two Desert Poplars, Populus euphratica and P. pruinosa
Source: PubMed Central journal article supplement (PMC3679102; doi:10.1371/journal.pone.0066370), 2013-06-11
Supplement: pone.0066370.s007.pdf [file pone.0066370.s007.pdf]

Unigene20083\_All (DNA-binding protein DF1)

|       |            |            |            |            |            |            |            |
|-------|------------|------------|------------|------------|------------|------------|------------|
|       | .... ....  | .... ....  | .... ....  | .... ....  | .... ....  | .... ....  | .... ....  |
|       | 10         | 20         | 30         | 40         | 50         | 60         | 70         |
| Peu_1 | AACCCTACAA | ATCCTCCTCA | TACTAATATT | TCACCCTCTT | TTCCAAACTT | CTCCTCAGAT | CTCATCTCCA |
| Peu_2 | AACCCTACAA | ATCCTCCTCA | TACTAATATT | TCACCCTCTT | TTCCAAACTT | CTCCTCAGAT | CTCATCTCCA |
| Peu_3 | AACCCTACAA | ATCCTCCTCA | TACTAATATT | TCACCCTCTT | TTCCAAACTT | CTCCTCAGAT | CTCATCTCCA |
| Peu_4 | AACCCTACAA | ATCCTCCTCA | TACTAATATT | TCACCCTCTT | TTCCAAACTT | CTCCTCAGAT | CTCATCTCCA |
| Peu_5 | AACCCTACAA | ATCCTCCTCA | TACTAATATT | TCACCCTCTT | TTCCAAACTT | CTCCTCAGAT | CTCATCTCCA |
| Ppr_1 | AACCCTACAA | ATCCTCCTCA | TACTAATATT | CCACCCTCTT | TTCCAAACTT | CTCCTCAGAT | CTCATCTCCA |
| Ppr_2 | AACCCTACAA | ATCCTCCTCA | TACTAATATT | CCACCCTCTT | TTCCAAACTT | CTCCTCAGAT | CTCATCTCCA |
| Ppr_3 | AACCCTACAA | ATCCTCCTCA | TACTAATATT | CCACCCTCTT | TTCCAAACTT | CTCCTCAGAT | CTCATCTCCA |
| Ppr_4 | AACCCTACAA | ATCCTCCTCA | TACTAATATT | CCACCCTCTT | TTCCAAACTT | CTCCTCAGAT | CTCATCTCCA |
| Ppr_5 | AACCCTACAA | ATCCTCCTCA | TACTAATATT | CCACCCTCTT | TTCCAAACTT | CTCCTCAGAT | CTCATCTCCA |

|       |            |            |            |            |            |            |            |
|-------|------------|------------|------------|------------|------------|------------|------------|
|       | .... ....  | .... ....  | .... ....  | .... ....  | .... ....  | .... ....  | .... ....  |
|       | 80         | 90         | 100        | 110        | 120        | 130        | 140        |
| Peu_1 | ATTCCACTTC | TTCATCGACA | TCCTCGGACG | TGGAACTGCA | AGAGCGTTGC | AAGAGGAAAA | GGAAATGGAA |
| Peu_2 | ATTCCACTTC | TTCATCGACA | TCCTCGGACG | TGGAACTGCA | AGAGCGTTGC | AAGAGGAAAA | GGAAATGGAA |
| Peu_3 | ATTCCACTTC | TTCATCGACA | TCCTCGGACG | TGGAACTGCA | AGAGCGTTGC | AAGAGGAAAA | GGAAATGGAA |
| Peu_4 | ATTCCACTTC | TTCATCGACA | TCCTCGGACG | TGGAACTGCA | AGAGCGTTGC | AAGAGGAAAA | GGAAATGGAA |
| Peu_5 | ATTCCACTTC | TTCATCGACA | TCCTCGGACG | TGGAACTGCA | AGAGCGTTGC | AAGAGGAAAA | GGAAATGGAA |
| Ppr_1 | ATTCCACTTC | TTCATCGACA | TCCTCGGACG | TGGAACTGCA | AGAGCGTTGC | AAGAGGAAAA | GGAAATGGAA |
| Ppr_2 | ATTCCACTTC | TTCATCGACA | TCCTCGGACG | TGGAACTGCA | AGAGCGTTGC | AAGAGGAAAA | GGAAATGGAA |
| Ppr_3 | ATTCCACTTC | TTCATCGACA | TCCTCGGACG | TGGAACTGCA | AGAGCGTTGC | AAGAGGAAAA | GGAAATGGAA |
| Ppr_4 | ATTCCACTTC | TTCATCGACA | TCCTCGGACG | TGGAACTGCA | AGAGCGTTGC | AAGAGGAAAA | GGAAATGGAA |
| Ppr_5 | ATTCCACTTC | TTCATCGACA | TCCTCGGACG | TGGAACTGCA | AGAGCGTTGC | AAGAGGAAAA | GGAAATGGAA |

|       |            |            |            |            |            |            |            |
|-------|------------|------------|------------|------------|------------|------------|------------|
|       | .... ....  | .... ....  | .... ....  | .... ....  | .... ....  | .... ....  | .... ....  |
|       | 150        | 160        | 170        | 180        | 190        | 200        | 210        |
| Peu_1 | GGACTTCTTT | GAAAGGCTCA | TGAAGGAGGT | GATCCAGAAG | CAAGAGGAGA | TGCAGAAGAA | GTTCTTGGAA |
| Peu_2 | GGACTTCTTT | GAAAGGCTCA | TGAAGGAGGT | GATCCAGAAG | CAAGAGGAGA | TGCAGAAGAA | GTTCTTGGAA |
| Peu_3 | GGACTTCTTT | GAAAGGCTCA | TGAAGGAGGT | GATCCAGAAG | CAAGAGGAGA | TGCAGAAGAA | GTTCTTGGAA |
| Peu_4 | GGACTTCTTT | GAAAGGCTCA | TGAAGGAGGT | GATCCAGAAG | CAAGAGGAGA | TGCAGAAGAA | GTTCTTGGAA |
| Peu_5 | GGACTTCTTT | GAAAGGCTCA | TGAAGGAGGT | GATCCAGAAG | CAAGAGGAGA | TGCAGAAGAA | GTTCTTGGAA |
| Ppr_1 | GGACTTCTTT | GAAAGGCTCA | TGAAGGAGGT | GATCCAGAAG | CAAGAGGAGA | TGCAGAAGAA | GTTCTTGGAA |
| Ppr_2 | GGACTTCTTT | GAAAGGCTCA | TGAAGGAGGT | GATCCAGAAG | CAAGAGGAGA | TGCAGAAGAA | GTTCTTGGAA |
| Ppr_3 | GGACTTCTTT | GAAAGGCTCA | TGAAGGAGGT | GATCCAGAAG | CAAGAGGAGA | TGCAGAAGAA | GTTCTTGGAA |
| Ppr_4 | GGACTTCTTT | GAAAGGCTCA | TGAAGGAGGT | GATCCAGAAG | CAAGAGGAGA | TGCAGAAGAA | GTTCTTGGAA |
| Ppr_5 | GGACTTCTTT | GAAAGGCTCA | TGAAGGAGGT | GATCCAGAAG | CAAGAGGAGA | TGCAGAAGAA | GTTCTTGGAA |

|       |            |            |            |            |            |            |            |
|-------|------------|------------|------------|------------|------------|------------|------------|
|       | .... ....  | .... ....  | .... ....  | .... ....  | .... ....  | .... ....  | .... ....  |
|       | 220        | 230        | 240        | 250        | 260        | 270        | 280        |
| Peu_1 | GCAATTGAGA | GACTCGAACA | TGAAAGAATG | GTTAGAGAAG | AATCTTGGAG | AATGCAGGAA | ATGACAAGAA |
| Peu_2 | GCAATTGAGA | GACTCGAACA | TGAAAGAATG | GTTAGAGAAG | AATCTTGGAG | AATGCAGGAA | ATGACAAGAA |
| Peu_3 | GCAATTGAGA | GACTCGAACA | TGAAAGAATG | GTTAGAGAAG | AATCTTGGAG | AATGCAGGAA | ATGACAAGAA |
| Peu_4 | GCAATTGAGA | GACTCGAACA | TGAAAGAATG | GTTAGAGAAG | AATCTTGGAG | AATGCAGGAA | ATGACAAGAA |
| Peu_5 | GCAATTGAGA | GACTCGAACA | TGAAAGAATG | GTTAGAGAAG | AATCTTGGAG | AATGCAGGAA | ATGACAAGAA |
| Ppr_1 | GCAATTGAGA | GACGCGAACA | TGAAAGAATG | GTTAGAGAAG | AATCTTGGAG | AACGCAGGAA | ATGACAAGAA |
| Ppr_2 | GCAATTGAGA | GACGCGAACA | TGAAAGAATG | GTTAGAGAAG | AATCTTGGAG | AACGCAGGAA | ATGACAAGAA |
| Ppr_3 | GCAATTGAGA | GACGCGAACA | TGAAAGAATG | GTTAGAGAAG | AATCTTGGAG | AACGCAGGAA | ATGACAAGAA |
| Ppr_4 | GCAATTGAGA | GACGCGAACA | TGAAAGAATG | GTTAGAGAAG | AATCTTGGAG | AACGCAGGAA | ATGACAAGAA |
| Ppr_5 | GCAATTGAGA | GACGCGAACA | TGAAAGAATG | GTTAGAGAAG | AATCTTGGAG | AACGCAGGAA | ATGACAAGAA |

|       |            |            |            |            |            |            |            |
|-------|------------|------------|------------|------------|------------|------------|------------|
|       | .... ....  | .... ....  | .... ....  | .... ....  | .... ....  | .... ....  | .... ....  |
|       | 290        | 300        | 310        | 320        | 330        | 340        | 350        |
| Peu_1 | TCAATAGAGA | GAGCGAGATC | TTAGCCCAAG | AAAGATCCGT | TGCGGCAAGT | AAAAATGCTG | AGGTAATGGC |
| Peu_2 | TCAATAGAGA | GAGCGAGATC | TTAGCCCAAG | AAAGATCCGT | TGCGGCAAGT | AAAAATGCTG | AGGTAATGGC |
| Peu_3 | TCAATAGAGA | GAGCGAGATC | TTAGCCCAAG | AAAGATCCGT | TGCGGCAAGT | AAAAATGCTG | AGGTAATGGC |
| Peu_4 | TCAATAGAGA | GAGCGAGATC | TTAGCCCAAG | AAAGATCCGT | TGCGGCAAGT | AAAAATGCTG | AGGTAATGGC |
| Peu_5 | TCAATAGAGA | GAGCGAGATC | TTAGCCCAAG | AAAGATCCGT | TGCGGCAAGT | AAAAATGCTG | AGGTAATGGC |
| Ppr_1 | TCAATAGAGA | GCGCGAGATC | TTAGCCCAAG | AAAGATCCGC | TGCGACAAGT | ATAGATGCTG | CGGTAATGGC |
| Ppr_2 | TCAATAGAGA | GCGCGAGATC | TTAGCCCAAG | AAAGATCCGC | TGCGACAAGT | ATAGATGCTG | CGGTAATGGC |
| Ppr_3 | TCAATAGAGA | GCGCGAGATC | TTAGCCCAAG | AAAGATCCGC | TGCGACAAGT | ATAGATGCTG | CGGTAATGGC |
| Ppr_4 | TCAATAGAGA | GCGCGAGATC | TTAGCCCAAG | AAAGATCCGC | TGCGACAAGT | ATAGATGCTG | CGGTAATGGC |
| Ppr_5 | TCAATAGAGA | GCGCGAGATC | TTAGCCCAAG | AAAGATCCGC | TGCGACAAGT | ATAGATGCTG | CGGTAATGGC |

|  |           |           |           |           |           |           |
|--|-----------|-----------|-----------|-----------|-----------|-----------|
|  | .... .... | .... .... | .... .... | .... .... | .... .... | .... .... |
|  | 360       | 370       | 380       | 390       | 400       | ...       |

|              |            |            |            |            |            |     |
|--------------|------------|------------|------------|------------|------------|-----|
| <b>Peu_1</b> | ATTTTTGCAA | AAATTATCCG | AAGAGCAACA | TCCGGGTCAA | ATACAAAATA | ATC |
| <b>Peu_2</b> | ATTTTTGCAA | AAATTATCCG | AAGAGCAACA | TCCGGGTCAA | ATACAAAATA | ATC |
| <b>Peu_3</b> | ATTTTTGCAA | AAATTATCCG | AAGAGCAACA | TCCGGGTCAA | ATACAAAATA | ATC |
| <b>Peu_4</b> | ATTTTTGCAA | AAATTATCCG | AAGAGCAACA | TCCGGGTCAA | ATACAAAATA | ATC |
| <b>Peu_5</b> | ATTTTTGCAA | AAATTATCCG | AAGAGCAACA | TCCGGGTCAA | ATACAAAATA | ATC |
| <b>Ppr_1</b> | ATTTTTGCAA | AAATTATCCG | AAGAGCAACA | TCCGGTTCAA | ATACAAAATA | ATC |
| <b>Ppr_2</b> | ATTTTTGCAA | AAATTATCCG | AAGAGCAACA | TCCGGTTCAA | ATACAAAATA | ATC |
| <b>Ppr_3</b> | ATTTTTGCAA | AAATTATCCG | AAGAGCAACA | TCCGGTTCAA | ATACAAAATA | ATC |
| <b>Ppr_4</b> | ATTTTTGCAA | AAATTATCCG | AAGAGCAACA | TCCGGTTCAA | ATACAAAATA | ATC |
| <b>Ppr_5</b> | ATTTTTGCAA | AAATTATCCG | AAGAGCAACA | TCCGGTTCAA | ATACAAAATA | ATC |

Unigene26469\_All (pentatricopeptide (PPR) repeat-containing protein)

|       |            |            |            |            |            |            |            |
|-------|------------|------------|------------|------------|------------|------------|------------|
|       | .... ....  | .... ....  | .... ....  | .... ....  | .... ....  | .... ....  | .... ....  |
|       | 10         | 20         | 30         | 40         | 50         | 60         | 70         |
| Peu_1 | TTGTCC-ACC | CACTACACCT | TTGGGAACCT | GCTGAATGCC | TCTGCAAATC | TTGCTGATCT | GAAGCTTGGC |
| Peu_2 | TTGTCC-ACC | CACTACACCT | TTGGGAACCT | GCTGAATGCC | TCTGCAAATC | TTGCTGATCT | GAAGCTTGGC |
| Peu_3 | TTGTCC-ACC | CACTACACCT | TTGGGAACCT | GCTGAATGCC | TCTGCAAATC | TTGCTGATCT | GAAGCTTGGC |
| Peu_4 | TTGTCC-ACC | CACTACACCT | TTGGGAACCT | GCTGAATGCC | TCTGCAAATC | TTGCTGATCT | GAAGCTTGGC |
| Peu_5 | TTGTCC-ACC | CACTACACCT | TTGGGAACCT | GCTGAATGCC | TCTGCAAATC | TTGCTGATCT | GAAGCTTGGC |
| Ppr_1 | TTGTCCGACC | CACTACACCT | TTGGGAACCT | GCTGAATGCC | TCTGCAAATC | TTGCTGATCT | GAAGCTTGGC |
| Ppr_2 | TTGTCCGACC | CACTACACCT | TTGGGAACCT | GCTGAATGCC | TCTGCAAATC | TTGCTGATCT | GAAGCTTGGC |
| Ppr_3 | TTGTCCGACC | CACTACACCT | TTGGGAACCT | GCTGAATGCC | TCTGCAAATC | TTGCTGATCT | GAAGCTTGGC |
| Ppr_4 | TTGTCCGACC | CACTACACCT | TTGGGAACCT | GCTGAATGCC | TCTGCAAATC | TTGCTGATCT | GAAGCTTGGC |
| Ppr_5 | TTGTCCGACC | CACTACACCT | TTGGGAACCT | GCTGAATGCC | TCTGCAAATC | TTGCTGATCT | GAAGCTTGGC |

|       |            |            |            |            |            |            |            |
|-------|------------|------------|------------|------------|------------|------------|------------|
|       | .... ....  | .... ....  | .... ....  | .... ....  | .... ....  | .... ....  | .... ....  |
|       | 80         | 90         | 100        | 110        | 120        | 130        | 140        |
| Peu_1 | AGGCAGGCAC | ATAGTCATGT | TGTTAAGCAT | GGATTTAGGT | TCCAGTCTGG | TGAAGAGCCT | GATATTTTTG |
| Peu_2 | AGGCAGGCAC | ATAGTCATGT | TGTTAAGCAT | GGATTTAGGT | TCCAGTCTGG | TGAAGAGCCT | GATATTTTTG |
| Peu_3 | AGGCAGGCAC | ATAGTCATGT | TGTTAAGCAT | GGATTTAGGT | TCCAGTCTGG | TGAAGAGCCT | GATATTTTTG |
| Peu_4 | AGGCAGGCAC | ATAGTCATGT | TGTTAAGCAT | GGATTTAGGT | TCCAGTCTGG | TGAAGAGCCT | GATATTTTTG |
| Peu_5 | AGGCAGGCAC | ATAGTCATGT | TGTTAAGCAT | GGATTTAGGT | TCCAGTCTGG | TGAAGAGCCT | GATATTTTTG |
| Ppr_1 | AGGCAGGCAC | ATAGTCATGT | TGTTAAGCAT | GGATTTAGGT | TCCAGTCTGG | TGAAGAGCCT | GATATTTTTG |
| Ppr_2 | AGGCAGGCAC | ATAGTCATGT | TGTTAAGCAT | GGATTTAGGT | TCCAGTCTGG | TGAAGAGCCT | GATATTTTTG |
| Ppr_3 | AGGCAGGCAC | ATAGTCATGT | TGTTAAGCAT | GGATTTAGGT | TCCAGTCTGG | TGAAGAGCCT | GATATTTTTG |
| Ppr_4 | AGGCAGGCAC | ATAGTCATGT | TGTTAAGCAT | GGATTTAGGT | TCCAGTCTGG | TGAAGAGCCT | GATATTTTTG |
| Ppr_5 | AGGCAGGCAC | ATAGTCATGT | TGTTAAGCAT | GGATTTAGGT | TCCAGTCTGG | TGAAGAGCCT | GATATTTTTG |

|       |            |            |            |            |            |            |            |
|-------|------------|------------|------------|------------|------------|------------|------------|
|       | .... ....  | .... ....  | .... ....  | .... ....  | .... ....  | .... ....  | .... ....  |
|       | 150        | 160        | 170        | 180        | 190        | 200        | 210        |
| Peu_1 | TGGGAAATTC | TCTCATAGAC | ATGTATATGA | AATGTGGATC | TGTTGAAGAG | GGACTTCGGG | TTTTTGAAAA |
| Peu_2 | TGGGAAATTC | TCTCATAGAC | ATGTATATGA | AATGTGGATC | TGTTGAAGAG | GGACTTCGGG | TTTTTGAAAA |
| Peu_3 | TGGGAAATTC | TCTCATAGAC | ATGTATATGA | AATGTGGATC | TGTTGAAGAG | GGACTTCGGG | TTTTTGAAAA |
| Peu_4 | TGGGAAATTC | TCTCATAGAC | ATGTATATGA | AATGTGGATC | TGTTGAAGAG | GGACTTCGGG | TTTTTGAAAA |
| Peu_5 | TGGGAAATTC | TCTCATAGAC | ATGTATATGA | AATGTGGATC | TGTTGAAGAG | GGACTTCGGG | TTTTTGAAAA |
| Ppr_1 | TGGGAAATTC | TCTCATAGAC | ATGTATATGA | AATGTGGATC | TGTTGAAGAG | GGACTTCGGG | TTTTTGAAAA |
| Ppr_2 | TGGGAAATTC | TCTCATAGAC | ATGTATATGA | AATGTGGATC | TGTTGAAGAG | GGACTTCGGG | TTTTTGAAAA |
| Ppr_3 | TGGGAAATTC | TCTCATAGAC | ATGTATATGA | AATGTGGATC | TGTTGAAGAG | GGACTTCGGG | TTTTTGAAAA |
| Ppr_4 | TGGGAAATTC | TCTCATAGAC | ATGTATATGA | AATGTGGATC | TGTTGAAGAG | GGACTTCGGG | TTTTTGAAAA |
| Ppr_5 | TGGGAAATTC | TCTCATAGAC | ATGTATATGA | AATGTGGATC | TGTTGAAGAG | GGACTTCGGG | TTTTTGAAAA |

|       |            |            |            |            |            |            |            |
|-------|------------|------------|------------|------------|------------|------------|------------|
|       | .... ....  | .... ....  | .... ....  | .... ....  | .... ....  | .... ....  | .... ....  |
|       | 220        | 230        | 240        | 250        | 260        | 270        | 280        |
| Peu_1 | CATGGTGGAA | AAGGATCATG | TATCATGGAA | CACCATGATA | ATAGGTTATG | CMCAAAATGG | CTACGGAATG |
| Peu_2 | CATGGTGGAA | AAGGATCATG | TATCATGGAA | CACCATGATA | ATAGGTTATG | CMCAAAATGG | CTACGGAATG |
| Peu_3 | CATGGTGGAA | AAGGATCATG | TATCATGGAA | CACCATGATA | ATAGGTTATG | CMCAAAATGG | CTACGGAATG |
| Peu_4 | CATGGTGGAA | AAGGATCATG | TATCATGGAA | CACCATGATA | ATAGGTTATG | CMCAAAATGG | CTACGGAATG |
| Peu_5 | CATGGTGGAA | AAGGATCATG | TATCATGGAA | CACCATGATA | ATAGGTTATG | CMCAAAATGG | CTACGGAATG |
| Ppr_1 | CATGGTGGAA | AAGGATCATG | TATCATGGAA | CACCATGATA | ATAGGTTATG | CACAAAATGG | CTTCGGAATG |
| Ppr_2 | CATGGTGGAA | AAGGATCATG | TATCATGGAA | CACCATGATA | ATAGGTTATG | CACAAAATGG | CTTCGGAATG |
| Ppr_3 | CATGGTGGAA | AAGGATCATG | TATCATGGAA | CACCATGATA | ATAGGTTATG | CACAAAATGG | CTTCGGAATG |
| Ppr_4 | CATGGTGGAA | AAGGATCATG | TATCATGGAA | CACCATGATA | ATAGGTTATG | CACAAAATGG | CTTCGGAATG |
| Ppr_5 | CATGGTGGAA | AAGGATCATG | TATCATGGAA | CACCATGATA | ATAGGTTATG | CACAAAATGG | CTTCGGAATG |

|       |            |            |            |            |            |            |            |
|-------|------------|------------|------------|------------|------------|------------|------------|
|       | .... ....  | .... ....  | .... ....  | .... ....  | .... ....  | .... ....  | .... ....  |
|       | 290        | 300        | 310        | 320        | 330        | 340        | 350        |
| Peu_1 | GAGGCCCTTG | AACTATTTCA | GAAAATGCTG | GAATCTGGAG | AGAAACCAGA | CCATGTTACA | ATGATTGGTA |
| Peu_2 | GAGGCCCTTG | AACTATTTCA | GAAAATGCTG | GAATCTGGAG | AGAAACCAGA | CCATGTTACA | ATGATTGGTA |
| Peu_3 | GAGGCCCTTG | AACTATTTCA | GAAAATGCTG | GAATCTGGAG | AGAAACCAGA | CCATGTTACA | ATGATTGGTA |
| Peu_4 | GAGGCCCTTG | AACTATTTCA | GAAAATGCTG | GAATCTGGAG | AGAAACCAGA | CCATGTTACA | ATGATTGGTA |
| Peu_5 | GAGGCCCTTG | AACTATTTCA | GAAAATGCTG | GAATCTGGAG | AGAAACCAGA | CCATGTTACA | ATGATTGGTA |
| Ppr_1 | GAGGCCCTTG | AACTATTTCA | GAAAATGCTG | GAATCTGGAG | AGAAACCAGA | CCATGTTACA | ATGATTGGTA |
| Ppr_2 | GAGGCCCTTG | AACTATTTCA | GAAAATGCTG | GAATCTGGAG | AGAAACCAGA | CCATGTTACA | ATGATTGGTA |
| Ppr_3 | GAGGCCCTTG | AACTATTTCA | GAAAATGCTG | GAATCTGGAG | AGAAACCAGA | CCATGTTACA | ATGATTGGTA |
| Ppr_4 | GAGGCCCTTG | AACTATTTCA | GAAAATGCTG | GAATCTGGAG | AGAAACCAGA | CCATGTTACA | ATGATTGGTA |
| Ppr_5 | GAGGCCCTTG | AACTATTTCA | GAAAATGCTG | GAATCTGGAG | AGAAACCAGA | CCATGTTACA | ATGATTGGTA |

|  |           |           |           |           |           |           |           |
|--|-----------|-----------|-----------|-----------|-----------|-----------|-----------|
|  | .... .... | .... .... | .... .... | .... .... | .... .... | .... .... | .... .... |
|  | 360       | 370       | 380       | 390       | 400       | 410       | 420       |

|       |            |            |            |            |            |            |            |
|-------|------------|------------|------------|------------|------------|------------|------------|
| Peu_1 | CTCTATGTGC | TTGTAGCCAC | GCAGGGCTTG | TTGAAGAGGG | ACGRCATTAC | TTTCTCTCAA | TGACTAAGGA |
| Peu_2 | CTCTATGTGC | TTGTAGCCAC | GCAGGGCTTG | TTGAAGAGGG | ACGRCATTAC | TTTCTCTCAA | TGACTAAGGA |
| Peu_3 | CTCTATGTGC | TTGTAGCCAC | GCAGGGCTTG | TTGAAGAGGG | ACGRCATTAC | TTTCTCTCAA | TGACTAAGGA |
| Peu_4 | CTCTATGTGC | TTGTAGCCAC | GCAGGGCTTG | TTGAAGAGGG | ACGRCATTAC | TTTCTCTCAA | TGACTAAGGA |
| Peu_5 | CTCTATGTGC | TTGTAGCCAC | GCAGGGCTTG | TTGAAGAGGG | ACGRCATTAC | TTTCTCTCAA | TGACTAAGGA |
| Ppr_1 | CTCTATGTGC | TTGTAGCCAT | GCAGGGCTTG | TTGAAGAGGG | ACGGCATTAC | TTTTTCTCAA | TGACTAAGGA |
| Ppr_2 | CTCTATGTGC | TTGTAGCCAT | GCAGGGCTTG | TTGAAGAGGG | ACGGCATTAC | TTTTTCTCAA | TGACTAAGGA |
| Ppr_3 | CTCTATGTGC | TTGTAGCCAT | GCAGGGCTTG | TTGAAGAGGG | ACGGCATTAC | TTTTTCTCAA | TGACTAAGGA |
| Ppr_4 | CTCTATGTGC | TTGTAGCCAT | GCAGGGCTTG | TTGAAGAGGG | ACGGCATTAC | TTTTTCTCAA | TGACTAAGGA |
| Ppr_5 | CTCTATGTGC | TTGTAGCCAT | GCAGGGCTTG | TTGAAGAGGG | ACGGCATTAC | TTTTTCTCAA | TGACTAAGGA |

.....|.....| .....|.....| .....|.....| .....|.....| .....|.....| .....|.....| .....|.....|

                  430                  440                  450                  460                  470                  480                  490

|       |            |             |            |            |            |            |            |
|-------|------------|-------------|------------|------------|------------|------------|------------|
| Peu_1 | ACATGGTTTG | CTACCAAGTGA | AGGACCATTA | TACATGTATG | GTTGATTTAC | TAGGCCGAGC | TGGTTGCCTT |
| Peu_2 | ACATGGTTTG | CTACCAAGTGA | AGGACCATTA | TACATGTATG | GTTGATTTAC | TAGGCCGAGC | TGGTTGCCTT |
| Peu_3 | ACATGGTTTG | CTACCAAGTGA | AGGACCATTA | TACATGTATG | GTTGATTTAC | TAGGCCGAGC | TGGTTGCCTT |
| Peu_4 | ACATGGTTTG | CTACCAAGTGA | AGGACCATTA | TACATGTATG | GTTGATTTAC | TAGGCCGAGC | TGGTTGCCTT |
| Peu_5 | ACATGGTTTG | CTACCAAGTGA | AGGACCATTA | TACATGTATG | GTTGATTTAC | TAGGCCGAGC | TGGTTGCCTT |
| Ppr_1 | ACATGGTTTG | CTACCGGTGA  | AGGACCATTA | TACATGTATG | GTTGATTTAC | TAGGCCGAGC | TGGTTGCCTT |
| Ppr_2 | ACATGGTTTG | CTACCGGTGA  | AGGACCATTA | TACATGTATG | GTTGATTTAC | TAGGCCGAGC | TGGTTGCCTT |
| Ppr_3 | ACATGGTTTG | CTACCGGTGA  | AGGACCATTA | TACATGTATG | GTTGATTTAC | TAGGCCGAGC | TGGTTGCCTT |
| Ppr_4 | ACATGGTTTG | CTACCGGTGA  | AGGACCATTA | TACATGTATG | GTTGATTTAC | TAGGCCGAGC | TGGTTGCCTT |
| Ppr_5 | ACATGGTTTG | CTACCGGTGA  | AGGACCATTA | TACATGTATG | GTTGATTTAC | TAGGCCGAGC | TGGTTGCCTT |

.....|.....| .....|.....|

                  500                  510

|       |            |            |
|-------|------------|------------|
| Peu_1 | GAGGAAGCAA | RGGATTTGAT |
| Peu_2 | GAGGAAGCAA | RGGATTTGAT |
| Peu_3 | GAGGAAGCAA | RGGATTTGAT |
| Peu_4 | GAGGAAGCAA | RGGATTTGAT |
| Peu_5 | GAGGAAGCAA | RGGATTTGAT |
| Ppr_1 | GAGGAAGCAA | AGGATTTGAT |
| Ppr_2 | GAGGAAGCAA | AGGATTTGAT |
| Ppr_3 | GAGGAAGCAA | AGGATTTGAT |
| Ppr_4 | GAGGAAGCAA | AGGATTTGAT |
| Ppr_5 | GAGGAAGCAA | AGGATTTGAT |

Unigene2702\_All (UDP-glucuronosyl/UDP-glucosyl transferase family protein)

|       |            |            |            |             |            |            |            |           |           |
|-------|------------|------------|------------|-------------|------------|------------|------------|-----------|-----------|
|       | .... ....  | .... ....  | .... ....  | .... ....   | .... ....  | .... ....  | .... ....  | .... .... | .... .... |
|       | 10         | 20         | 30         | 40          | 50         | 60         | 70         |           |           |
| Peu_1 | TATTCCACAT | CAAATGTTGA | TATTCTTCCT | CTTAGTCAGG  | GCGAACATCC | TCAAAAGAAA | TCTTCCAGTG |           |           |
| Peu_2 | TATTCCACAT | CAAATGTTGA | TATTCTTCCT | CTTAGTCAGG  | GCGAACATCC | TCAAAAGAAA | TCTTCCAGTG |           |           |
| Peu_3 | TATTCCACAT | CAAATGTTGA | TATTCTTCCT | CTTAGTCAGG  | GCGAACATCC | TCAAAAGAAA | TCTTCCAGTG |           |           |
| Peu_4 | TATTCCACAT | CAAATGTTGA | TATTCTTCCT | CTTAGTCAGG  | GCGAACATCC | TCAAAAGAAA | TCTTCCAGTG |           |           |
| Peu_5 | TATTCCACAT | CAAATGTTGA | TATTCTTCCT | CTTAGTCAGG  | GCGAACATCC | TCAAAAGAAA | TCTTCCAGTG |           |           |
| Ppr_1 | TATTCCACAT | CAAATGTTGA | TATTCTTCCT | CTTAGTCAGG  | GCGAACATCC | TCAAAAGAAA | TCTTCCAGTG |           |           |
| Ppr_2 | TATTCCACAT | CAAATGTTGA | TATTCTTCCT | CTTAGTCAGG  | GCGAACATCC | TCAAAAGAAA | TCTTCCAGTG |           |           |
| Ppr_3 | TATTCCACAT | CAAATGTTGA | TATTCTTCCT | CTTAGTCAGG  | GCGAACATCC | TCAAAAGAAA | TCTTCCAGTG |           |           |
| Ppr_4 | TATTCCACAT | CAAATGTTGA | TATTCTTCCT | CTTAGTCAGG  | GCGAACATCC | TCAAAAGAAA | TCTTCCAGTG |           |           |
|       | .... ....  | .... ....  | .... ....  | .... ....   | .... ....  | .... ....  | .... ....  | .... .... | .... .... |
|       | 80         | 90         | 100        | 110         | 120        | 130        | 140        |           |           |
| Peu_1 | GACAGAGCAG | TGCAGATGAA | TTGTATCCAT | CTGATCATGC  | TGCAGCCTTC | CTTTCCTTAA | TGAAAAGCAG |           |           |
| Peu_2 | GACAGAGCAG | TGCAGATGAA | TTGTATCCAT | CTGATCATGC  | TGCAGCCTTC | CTTTCCTTAA | TGAAAAGCAG |           |           |
| Peu_3 | GACAGAGCAG | TGCAGATGAA | TTGTATCCAT | CTGATCATGC  | TGCAGCCTTC | CTTTCCTTAA | TGAAAAGCAG |           |           |
| Peu_4 | GACAGAGCAG | TGCAGATGAA | TTGTATCCAT | CTGATCATGC  | TGCAGCCTTC | CTTTCCTTAA | TGAAAAGCAG |           |           |
| Peu_5 | GACAGAGCAG | TGCAGATGAA | TTGTATCCAT | CTGATCATGC  | TGCAGCCTTC | CTTTCCTTAA | TGAAAAGCAG |           |           |
| Ppr_1 | GACAGAGCAG | TGCAGATGAA | TTGTATCCAT | CTGATCATGC  | TGCAGCCTTC | CTTTCCTTAA | TGAAAAGCAG |           |           |
| Ppr_2 | GACAGAGCAG | TGCAGATGAA | TTGTATCCAT | CTGATCATGC  | TGCAGCCTTC | CTTTCCTTAA | TGAAAAGCAG |           |           |
| Ppr_3 | GACAGAGCAG | TGCAGATGAA | TTGTATCCAT | CTGATCATGC  | TGCAGCCTTC | CTTTCCTTAA | TGAAAAGCAG |           |           |
| Ppr_4 | GACAGAGCAG | TGCAGATGAA | TTGTATCCAT | CTGATCATGC  | TGCAGCCTTC | CTTTCCTTAA | TGAAAAGCAG |           |           |
|       | .... ....  | .... ....  | .... ....  | .... ....   | .... ....  | .... ....  | .... ....  | .... .... | .... .... |
|       | 150        | 160        | 170        | 180         | 190        | 200        | 210        |           |           |
| Peu_1 | CGGAACACTG | GATGTATTAT | TATCACAGGG | AAAGGAGTAC  | GTACATGTGG | TGAGCTCCGA | TAATGTAGCT |           |           |
| Peu_2 | CGGAACACTG | GATGTATTAT | TATCACAGGG | AAAGGAGTAC  | GTACATGTGG | TGAGCTCCGA | TAATGTAGCT |           |           |
| Peu_3 | CGGAACACTG | GATGTATTAT | TATCACAGGG | AAAGGAGTAC  | GTACATGTGG | TGAGCTCCGA | TAATGTAGCT |           |           |
| Peu_4 | CGGAACACTG | GATGTATTAT | TATCACAGGG | AAAGGAGTAC  | GTACATGTGG | TGAGCTCCGA | TAATGTAGCT |           |           |
| Peu_5 | CGGAACACTG | GATGTATTAT | TATCACAGGG | AAAGGAGTAC  | GTACATGTGG | TGAGCTCCGA | TAATGTAGCT |           |           |
| Ppr_1 | CGGAACACTG | GATGTATTAT | TATCACAGGG | AAAGGAGTAC  | GTACATGTGG | TGAGCTCCGA | TAATGTAGCT |           |           |
| Ppr_2 | CGGAACACTG | GATGTATTAT | TATCACAGGG | AAAGGAGTAC  | GTACATGTGG | TGAGCTCCGA | TAATGTAGCT |           |           |
| Ppr_3 | CGGAACACTG | GATGTATTAT | TATCACAGGG | AAAGGAGTAC  | GTACATGTGG | TGAGCTCCGA | TAATGTAGCT |           |           |
| Ppr_4 | CGGAACACTG | GATGTATTAT | TATCACAGGG | AAAGGAGTAC  | GTACATGTGG | TGAGCTCCGA | TAATGTAGCT |           |           |
|       | .... ....  | .... ....  | .... ....  | .... ....   | .... ....  | .... ....  | .... ....  | .... .... | .... .... |
|       | 220        | 230        | 240        | 250         | 260        | 270        | 280        |           |           |
| Peu_1 | GCAGCTGTTG | ATCCAAGAAT | CATGAGTCAT | TTGAGCCAAA  | ACAATATTGA | ATACTGTATG | GAGGTGACAC |           |           |
| Peu_2 | GCAGCTGTTG | ATCCAAGAAT | CATGAGTCAT | TTGAGCCAAA  | ACAATATTGA | ATACTGTATG | GAGGTGACAC |           |           |
| Peu_3 | GCAGCTGTTG | ATCCAAGAAT | CATGAGTCAT | TTGAGCCAAA  | ACAATATTGA | ATACTGTATG | GAGGTGACAC |           |           |
| Peu_4 | GCAGCTGTTG | ATCCAAGAAT | CATGAGTCAT | TTGAGCCAAA  | ACAATATTGA | ATACTGTATG | GAGGTGACAC |           |           |
| Peu_5 | GCAGCTGTTG | ATCCAAGAAT | CATGAGTCAT | TTGAGCCAAA  | ACAATATTGA | ATACTGTATG | GAGGTGACAC |           |           |
| Ppr_1 | GCAGCTGTTG | ATCCAAGAAT | CATGAGTCAT | TTGAGCCAAA  | ACAATATTGA | ATACTGTATG | GAGGTGACAC |           |           |
| Ppr_2 | GCAGCTGTTG | ATCCAAGAAT | CATGAGTCAT | TTGAGCCAAA  | ACAATATTGA | ATACTGTATG | GAGGTGACAC |           |           |
| Ppr_3 | GCAGCTGTTG | ATCCAAGAAT | CATGAGTCAT | TTGAGCCAAA  | ACAATATTGA | ATACTGTATG | GAGGTGACAC |           |           |
| Ppr_4 | GCAGCTGTTG | ATCCAAGAAT | CATGAGTCAT | TTGAGCCAAA  | ACAATATTGA | ATACTGTATG | GAGGTGACAC |           |           |
|       | .... ....  | .... ....  | .... ....  | .... ....   | .... ....  | .... ....  | .... ....  | .... .... | .... .... |
|       | 290        | 300        | 310        | 320         | 330        | 340        | 350        |           |           |
| Peu_1 | CAACCACTTC | ATATCTTTCA | AAAAGTAAAA | TGGCCAGTCA  | GCAGCAAGGA | AAGTTTGAGC | TTGCAGAAAT |           |           |
| Peu_2 | CAACCACTTC | ATATCTTTCA | AAAAGTAAAA | TGGCCAGTCA  | GCAGCAAGGA | AAGTTTGAGC | TTGCAGAAAT |           |           |
| Peu_3 | CAACCACTTC | ATATCTTTCA | AAAAGTAAAA | TGGCCAGTCA  | GCAGCAAGGA | AAGTTTGAGC | TTGCAGAAAT |           |           |
| Peu_4 | CAACCACTTC | ATATCTTTCA | AAAAGTAAAA | TGGCCAGTCA  | GCAGCAAGGA | AAGTTTGAGC | TTGCAGAAAT |           |           |
| Peu_5 | CAACCACTTC | ATATCTTTCA | AAAAGTAAAA | TGGCCAGTCA  | GCAGCAAGGA | AAGTTTGAGC | TTGCAGAAAT |           |           |
| Ppr_1 | CAACCACTTC | ATATCTTTCA | AAAAGTAAAA | TGGCCAAATCA | GCAGCAAGGA | ATGTTTGAGC | TTGCAGAAAT |           |           |
| Ppr_2 | CAACCACTTC | ATATCTTTCA | AAAAGTAAAA | TGGCCAAATCA | GCAGCAAGGA | ATGTTTGAGC | TTGCAGAAAT |           |           |
| Ppr_3 | CAACCACTTC | ATATCTTTCA | AAAAGTAAAA | TGGCCAAATCA | GCAGCAAGGA | ATGTTTGAGC | TTGCAGAAAT |           |           |
| Ppr_4 | CAACCACTTC | ATATCTTTCA | AAAAGTAAAA | TGGCCAAATCA | GCAGCAAGGA | ATGTTTGAGC | TTGCAGAAAT |           |           |
|       | .... ....  | .... ....  | .... ....  | .... ....   | .... ....  | .... ....  | .... ....  | .... .... | .... .... |
|       | 360        | 370        | 380        | 390         | 400        | 410        | 420        |           |           |
| Peu_1 | AGCGCGAGCA | CTTCTTAAAG | ATTCAACGGA | GAAGTTTCAA  | TTTATCGACA | CAAGAAGTTT | GTGGGTGAAT |           |           |
| Peu_2 | AGCGCGAGCA | CTTCTTAAAG | ATTCAACGGA | GAAGTTTCAA  | TTTATCGACA | CAAGAAGTTT | GTGGGTGAAT |           |           |
| Peu_3 | AGCGCGAGCA | CTTCTTAAAG | ATTCAACGGA | GAAGTTTCAA  | TTTATCGACA | CAAGAAGTTT | GTGGGTGAAT |           |           |
| Peu_4 | AGCGCGAGCA | CTTCTTAAAG | ATTCAACGGA | GAAGTTTCAA  | TTTATCGACA | CAAGAAGTTT | GTGGGTGAAT |           |           |
| Peu_5 | AGCGCGAGCA | CTTCTTAAAG | ATTCAACGGA | GAAGTTTCAA  | TTTATCGACA | CAAGAAGTTT | GTGGGTGAAT |           |           |

|       |            |            |            |             |            |            |            |     |
|-------|------------|------------|------------|-------------|------------|------------|------------|-----|
| Ppr_1 | AGCGCGAACA | CTTCCTAAAG | ATTCAACGGA | GAAGTTCAAA  | TTTATCGACA | CAAGAAGTTT | GTGGGTGAAT |     |
| Ppr_2 | AGCGCGAACA | CTTCCTAAAG | ATTCAACGGA | GAAGTTCAAA  | TTTATCGACA | CAAGAAGTTT | GTGGGTGAAT |     |
| Ppr_3 | AGCGCGAACA | CTTCCTAAAG | ATTCAACGGA | GAAGTTCAAA  | TTTATCGACA | CAAGAAGTTT | GTGGGTGAAT |     |
| Ppr_4 | AGCGCGAACA | CTTCCTAAAG | ATTCAACGGA | GAAGTTCAAA  | TTTATCGACA | CAAGAAGTTT | GTGGGTGAAT |     |
|       | .... ....  | .... ....  | .... ....  | .... ....   | .... ....  | .... ....  | .... ....  |     |
|       |            | 430        | 440        | 450         | 460        | 470        | 480        | 490 |
| Peu_1 | TTGAAAGCAA | TCAGAAGGCT | TGTTGATACC | AATGCCCTGA  | AGATAGAGAA | CCTGTCTATT | TCAAAGGAAG |     |
| Peu_2 | TTGAAAGCAA | TCAGAAGGCT | TGTTGATACC | AATGCCCTGA  | AGATAGAGAA | CCTGTCTATT | TCAAAGGAAG |     |
| Peu_3 | TTGAAAGCAA | TCAGAAGGCT | TGTTGATACC | AATGCCCTGA  | AGATAGAGAA | CCTGTCTATT | TCAAAGGAAG |     |
| Peu_4 | TTGAAAGCAA | TCAGAAGGCT | TGTTGATACC | AATGCCCTGA  | AGATAGAGAA | CCTGTCTATT | TCAAAGGAAG |     |
| Peu_5 | TTGAAAGCAA | TCAGAAGGCT | TGTTGATACC | AATGCCCTGA  | AGATAGAGAA | CCTGTCTATT | TCAAAGGAAG |     |
| Ppr_1 | TTGAAAGCAA | TCAGAAGGCT | TGTTGATACC | AATGCCCTGA  | AGATAGAGAA | CCTGTCTATT | TCAAAGGAAG |     |
| Ppr_2 | TTGAAAGCAA | TCAGAAGGCT | TGTTGATACC | AATGCCCTGA  | AGATAGAGAA | CCTGTCTATT | TCAAAGGAAG |     |
| Ppr_3 | TTGAAAGCAA | TCAGAAGGCT | TGTTGATACC | AATGCCCTGA  | AGATAGAGAA | CCTGTCTATT | TCAAAGGAAG |     |
| Ppr_4 | TTGAAAGCAA | TCAGAAGGCT | TGTTGATACC | AATGCCCTGA  | AGATAGAGAA | CCTGTCTATT | TCAAAGGAAG |     |
|       | .... ....  | .... ....  | .... ....  | .... ....   | .... ....  | .... ....  | .... ....  |     |
|       |            | 500        | 510        | 520         | 530        | 540        | 550        | 560 |
| Peu_1 | TGGAAGGTGA | TCAAATGGTT | TTGCAAGAGA | CAGCAGCCGG  | TTGACAATA  | CAGTTATTTG | ATAAAGCCAT |     |
| Peu_2 | TGGAAGGTGA | TCAAATGGTT | TTGCAAGAGA | CAGCAGCCGG  | TTGACAATA  | CAGTTATTTG | ATAAAGCCAT |     |
| Peu_3 | TGGAAGGTGA | TCAAATGGTT | TTGCAAGAGA | CAGCAGCCGG  | TTGACAATA  | CAGTTATTTG | ATAAAGCCAT |     |
| Peu_4 | TGGAAGGTGA | TCAAATGGTT | TTGCAAGAGA | CAGCAGCCGG  | TTGACAATA  | CAGTTATTTG | ATAAAGCCAT |     |
| Peu_5 | TGGAAGGTGA | TCAAATGGTT | TTGCAAGAGA | CAGCAGCCGG  | TTGACAATA  | CAGTTATTTG | ATAAAGCCAT |     |
| Ppr_1 | TGGAAGGTGA | TCAAATGGTT | TTGCAAGAGA | CAGCAGCCGG  | TTGACAATA  | CAGTTATTTG | ATAAAGCCAT |     |
| Ppr_2 | TGGAAGGTGA | TCAAATGGTT | TTGCAAGAGA | CAGCAGCCGG  | TTGACAATA  | CAGTTATTTG | ATAAAGCCAT |     |
| Ppr_3 | TGGAAGGTGA | TCAAATGGTT | TTGCAAGAGA | CAGCAGCCGG  | TTGACAATA  | CAGTTATTTG | ATAAAGCCAT |     |
| Ppr_4 | TGGAAGGTGA | TCAAATGGTT | TTGCAAGAGA | CAGCAGCCGG  | TTGACAATA  | CAGTTATTTG | ATAAAGCCAT |     |
|       | .... ....  | .... ....  | .... ....  | .... ....   | .... ....  | .... ....  | .... ....  |     |
|       |            | 570        | 580        | 590         | 600        | 610        | 620        | 630 |
| Peu_1 | CGGCGTTAAT | GTCCCTCAAT | TTCGGGTTGT | GCAACTAAAT  | GCAACATCAG | ACTTGCTTCT | TCTTCAGTCA |     |
| Peu_2 | CGGCGTTAAT | GTCCCTCAAT | TTCGGGTTGT | GCAACTAAAT  | GCAACATCAG | ACTTGCTTCT | TCTTCAGTCA |     |
| Peu_3 | CGGCGTTAAT | GTCCCTCAAT | TTCGGGTTGT | GCAACTAAAT  | GCAACATCAG | ACTTGCTTCT | TCTTCAGTCA |     |
| Peu_4 | CGGCGTTAAT | GTCCCTCAAT | TTCGGGTTGT | GCAACTAAAT  | GCAACATCAG | ACTTGCTTCT | TCTTCAGTCA |     |
| Peu_5 | CGGCGTTAAT | GTCCCTCAAT | TTCGGGTTGT | GCAACTAAAT  | GCAACATCAG | ACTTGCTTCT | TCTTCAGTCA |     |
| Ppr_1 | CGGCGTTAAT | GTCCCTCAAT | TTCGGGTTGT | GCAACTAAAT  | GCAACATCAG | ACTTGCTTCT | TCTTCAGTCA |     |
| Ppr_2 | CGGCGTTAAT | GTCCCTCAAT | TTCGGGTTGT | GCAACTAAAT  | GCAACATCAG | ACTTGCTTCT | TCTTCAGTCA |     |
| Ppr_3 | CGGCGTTAAT | GTCCCTCAAT | TTCGGGTTGT | GCAACTAAAT  | GCAACATCAG | ACTTGCTTCT | TCTTCAGTCA |     |
| Ppr_4 | CGGCGTTAAT | GTCCCTCAAT | TTCGGGTTGT | GCAACTAAAT  | GCAACATCAG | ACTTGCTTCT | TCTTCAGTCA |     |
|       | .... ....  | .... ....  | .... ....  | .... ....   | .... ....  | .... ....  | .... ....  |     |
|       |            | 640        | 650        | 660         | 670        | 680        | 690        | 700 |
| Peu_1 | GATCTGTACT | CCACCTCTGA | AGGTGTTTTA | GTTTCGGAACA | CAGCTCAAGC | TAACCCTGCA | AATCCATGTA |     |
| Peu_2 | GATCTGTACT | CCACCTCTGA | AGGTGTTTTA | GTTTCGGAACA | CAGCTCAAGC | TAACCCTGCA | AATCCATGTA |     |
| Peu_3 | GATCTGTACT | CCACCTCTGA | AGGTGTTTTA | GTTTCGGAACA | CAGCTCAAGC | TAACCCTGCA | AATCCATGTA |     |
| Peu_4 | GATCTGTACT | CCACCTCTGA | AGGTGTTTTA | GTTTCGGAACA | CAGCTCAAGC | TAACCCTGCA | AATCCATGTA |     |
| Peu_5 | GATCTGTACT | CCACCTCTGA | AGGTGTTTTA | GTTTCGGAACA | CAGCTCAAGC | TAACCCTGCA | AATCCATGTA |     |
| Ppr_1 | GATCTGTACT | CCACCTCTGA | AGGTGTTTTA | GTTTCGGAACA | CAGCTCAAGC | TAACCCTGCA | AATCCATGTA |     |
| Ppr_2 | GATCTGTACT | CCACCTCTGA | AGGTGTTTTA | GTTTCGGAACA | CAGCTCAAGC | TAACCCTGCA | AATCCATGTA |     |
| Ppr_3 | GATCTGTACT | CCACCTCTGA | AGGTGTTTTA | GTTTCGGAACA | CAGCTCAAGC | TAACCCTGCA | AATCCATGTA |     |
| Ppr_4 | GATCTGTACT | CCACCTCTGA | AGGTGTTTTA | GTTTCGGAACA | CAGCTCAAGC | TAACCCTGCA | AATCCATGTA |     |
|       | ...        |            |            |             |            |            |            |     |
| Peu_1 | TTG        |            |            |             |            |            |            |     |
| Peu_2 | TTG        |            |            |             |            |            |            |     |
| Peu_3 | TTG        |            |            |             |            |            |            |     |
| Peu_4 | TTG        |            |            |             |            |            |            |     |
| Peu_5 | TTG        |            |            |             |            |            |            |     |
| Ppr_1 | TTG        |            |            |             |            |            |            |     |
| Ppr_2 | TTG        |            |            |             |            |            |            |     |
| Ppr_3 | TTG        |            |            |             |            |            |            |     |
| Ppr_4 | TTG        |            |            |             |            |            |            |     |

## Unigene37561\_All (heat stress transcription factor A3)

|              |            |            |            |            |            |             |            |           |           |           |
|--------------|------------|------------|------------|------------|------------|-------------|------------|-----------|-----------|-----------|
|              | .... ....  | .... ....  | .... ....  | .... ....  | .... ....  | .... ....   | .... ....  | .... .... | .... .... | .... .... |
|              |            | 10         | 20         | 30         | 40         | 50          | 60         | 70        |           |           |
| <b>Peu_1</b> | GATGGCCATC | TCATATTGAT | TTTACTGGGG | AAATGTTGGG | GGCAAAGAAG | CTTAGGAAGA  | CTATGTCACA |           |           |           |
| <b>Peu_2</b> | GATGGCCATC | TCATATTGAT | TTTACTGGGG | AAATGTTGGG | GGCAAAGAAG | CTTAGGAAGA  | CTATGTCACA |           |           |           |
| <b>Peu_3</b> | GATGGCCATC | TCATATTGAT | TTTACTGGGG | AAATGTTGGG | GGCAAAGAAG | CTTAGGAAGA  | CTATGTCACA |           |           |           |
| <b>Peu_4</b> | GATGGCCATC | TCATATTGAT | TTTACTGGGG | AAATGTTGGG | GGCAAAGAAG | CTTAGGAAGA  | CTATGTCACA |           |           |           |
| <b>Peu_5</b> | GATGGCCATC | TCATATTGAT | TTTACTGGGG | AAATGTTGGG | GGCAAAGAAG | CTTAGGAAGA  | CTATGTCACA |           |           |           |
| <b>Ppr_1</b> | GATGGCCATC | TCATATTGAT | TTTACTGGGG | AAATGTTGGG | GGCAAAGAAG | CTTAGGAAGA  | CTATGTCACA |           |           |           |
| <b>Ppr_2</b> | GATGGCCATC | TCATATTGAT | TTTACTGGGG | AAATGTTGGG | GGCAAAGAAG | CTTAGGAAGA  | CTATGTCACA |           |           |           |
| <b>Ppr_3</b> | GATGGCCATC | TCATATTGAT | TTTACTGGGG | AAATGTTGGG | GGCAAAGAAG | CTTAGGAAGA  | CTATGTCACA |           |           |           |
| <b>Ppr_4</b> | GATGGCCATC | TCATATTGAT | TTTACTGGGG | AAATGTTGGG | GGCAAAGAAG | CTTAGGAAGA  | CTATGTCACA |           |           |           |
| <b>Ppr_5</b> | GATGGCCATC | TCATATTGAT | TTTACTGGGG | AAATGTTGGG | GGCAAAGAAG | CTTAGGAAGA  | CTATGTCACA |           |           |           |
|              | .... ....  | .... ....  | .... ....  | .... ....  | .... ....  | .... ....   | .... ....  | .... .... | .... .... | .... .... |
|              |            | 80         | 90         | 100        | 110        | 120         | 130        | 140       |           |           |
| <b>Peu_1</b> | TCCAGCTAAT | GGTAGCGCTG | ATGATCTAGT | TTTTGGAAAT | GAAGTTAGAC | CTCGTAAGGA  | ATTTTTCCGA |           |           |           |
| <b>Peu_2</b> | TCCAGCTAAT | GGTAGCGCTG | ATGATCTAGT | TTTTGGAAAT | GAAGTTAGAC | CTCGTAAGGA  | ATTTTTCCGA |           |           |           |
| <b>Peu_3</b> | TCCAGCTAAT | GGTAGCGCTG | ATGATCTAGT | TTTTGGAAAT | GAAGTTAGAC | CTCGTAAGGA  | ATTTTTCCGA |           |           |           |
| <b>Peu_4</b> | TCCAGCTAAT | GGTAGCGCTG | ATGATCTAGT | TTTTGGAAAT | GAAGTTAGAC | CTCGTAAGGA  | ATTTTTCCGA |           |           |           |
| <b>Peu_5</b> | TCCAGCTAAT | GGTAGCGCTG | ATGATCTAGT | TTTTGGAAAT | GAAGTTAGAC | CTCGTAAGGA  | ATTTTTCCGA |           |           |           |
| <b>Ppr_1</b> | TCCAGCTAAT | GGTAGCGCTG | ATGATCTAGT | TTTTGGAAAT | GAAGTTAGAC | CTCGTAAGGA  | ATTTTTCCGA |           |           |           |
| <b>Ppr_2</b> | TCCAGCTAAT | GGTAGCGCTG | ATGATCTAGT | TTTTGGAAAT | GAAGTTAGAC | CTCGTAAGGA  | ATTTTTCCGA |           |           |           |
| <b>Ppr_3</b> | TCCAGCTAAT | GGTAGCGCTG | ATGATCTAGT | TTTTGGAAAT | GAAGTTAGAC | CTCGTAAGGA  | ATTTTTCCGA |           |           |           |
| <b>Ppr_4</b> | TCCAGCTAAT | GGTAGCGCTG | ATGATCTAGT | TTTTGGAAAT | GAAGTTAGAC | CTCGTAAGGA  | ATTTTTCCGA |           |           |           |
| <b>Ppr_5</b> | TCCAGCTAAT | GGTAGCGCTG | ATGATCTAGT | TTTTGGAAAT | GAAGTTAGAC | CTCGTAAGGA  | ATTTTTCCGA |           |           |           |
|              | .... ....  | .... ....  | .... ....  | .... ....  | .... ....  | .... ....   | .... ....  | .... .... | .... .... | .... .... |
|              |            | 150        | 160        | 170        | 180        | 190         | 200        | 210       |           |           |
| <b>Peu_1</b> | AATGACTCTC | TTCCTAATGA | GACGTTTGTA | ACTATTTCTC | ACGTCAGTCT | TAAAAC TCAC | CCCTCTCAGT |           |           |           |
| <b>Peu_2</b> | AATGACTCTC | TTCCTAATGA | GACGTTTGTA | ACTATTTCTC | ACGTCAGTCT | TAAAAC TCAC | CCCTCTCAGT |           |           |           |
| <b>Peu_3</b> | AATGACTCTC | TTCCTAATGA | GACGTTTGTA | ACTATTTCTC | ACGTCAGTCT | TAAAAC TCAC | CCCTCTCAGT |           |           |           |
| <b>Peu_4</b> | AATGACTCTC | TTCCTAATGA | GACGTTTGTA | ACTATTTCTC | ACGTCAGTCT | TAAAAC TCAC | CCCTCTCAGT |           |           |           |
| <b>Peu_5</b> | AATGACTCTC | TTCCTAATGA | GACGTTTGTA | ACTATTTCTC | ACGTCAGTCT | TAAAAC TCAC | CCCTCTCAGT |           |           |           |
| <b>Ppr_1</b> | AATGACTCTC | TTCCTAATGA | GACGTTTGTA | ACTATTTCTC | ACGTCAGTCT | TAAAAC TCAC | CCCTCTCAGT |           |           |           |
| <b>Ppr_2</b> | AATGACTCTC | TTCCTAATGA | GACGTTTGTA | ACTATTTCTC | ACGTCAGTCT | TAAAAC TCAC | CCCTCTCAGT |           |           |           |
| <b>Ppr_3</b> | AATGACTCTC | TTCCTAATGA | GACGTTTGTA | ACTATTTCTC | ACGTCAGTCT | TAAAAC TCAC | CCCTCTCAGT |           |           |           |
| <b>Ppr_4</b> | AATGACTCTC | TTCCTAATGA | GACGTTTGTA | ACTATTTCTC | ACGTCAGTCT | TAAAAC TCAC | CCCTCTCAGT |           |           |           |
| <b>Ppr_5</b> | AATGACTCTC | TTCCTAATGA | GACGTTTGTA | ACTATTTCTC | ACGTCAGTCT | TAAAAC TCAC | CCCTCTCAGT |           |           |           |
|              | .... ....  | .... ....  | .... ....  | .... ....  | .... ....  | .... ....   | .... ....  | .... .... | .... .... | .... .... |
|              |            | 220        | 230        | 240        | 250        | 260         | 270        | 280       |           |           |
| <b>Peu_1</b> | TGCCACCACC | TTCTAGACCA | CCGCCTGCAT | TAGATGTCAA | CAAGAGGGAT | TCTTG TAAAT | CAACTCCAAA |           |           |           |
| <b>Peu_2</b> | TGCCACCACC | TTCTAGACCA | CCGCCTGCAT | TAGATGTCAA | CAAGAGGGAT | TCTTG TAAAT | CAACTCCAAA |           |           |           |
| <b>Peu_3</b> | TGCCACCACC | TTCTAGACCA | CCGCCTGCAT | TAGATGTCAA | CAAGAGGGAT | TCTTG TAAAT | CAACTCCAAA |           |           |           |
| <b>Peu_4</b> | TGCCACCACC | TTCTAGACCA | CCGCCTGCAT | TAGATGTCAA | CAAGAGGGAT | TCTTG TAAAT | CAACTCCAAA |           |           |           |
| <b>Peu_5</b> | TGCCACCACC | TTCTAGACCA | CCGCCTGCAT | TAGATGTCAA | CAAGAGGGAT | TCTTG TAAAT | CAACTCCAAA |           |           |           |
| <b>Ppr_1</b> | TGCCACCACC | TTCTAGACCA | CCGCCTGCAT | TAGATGTCAA | CAAGAGGGAT | TCTTG TAAAT | CAACTCCAAA |           |           |           |
| <b>Ppr_2</b> | TGCCACCACC | TTCTAGACCA | CCGCCTGCAT | TAGATGTCAA | CAAGAGGGAT | TCTTG TAAAT | CAACTCCAAA |           |           |           |
| <b>Ppr_3</b> | TGCCACCACC | TTCTAGACCA | CCGCCTGCAT | TAGATGTCAA | CAAGAGGGAT | TCTTG TAAAT | CAACTCCAAA |           |           |           |
| <b>Ppr_4</b> | TGCCACCACC | TTCTAGACCA | CCGCCTGCAT | TAGATGTCAA | CAAGAGGGAT | TCTTG TAAAT | CAACTCCAAA |           |           |           |
| <b>Ppr_5</b> | TGCCACCACC | TTCTAGACCA | CCGCCTGCAT | TAGATGTCAA | CAAGAGGGAT | TCTTG TAAAT | CAACTCCAAA |           |           |           |
|              | .... ....  | .... ....  | .... ....  | .... ....  | .... ....  | .... ....   | .... ....  | .... .... | .... .... | .... .... |
|              |            | 290        | 300        | 310        | 320        | 330         | 340        | 350       |           |           |
| <b>Peu_1</b> | CTGTCACAGC | GCTGCTTCCT | CAGGAAGTGC | TGGTGATAGT | TCTCCACCTT | ACTTTGATGT  | TGAGGTAGAT |           |           |           |
| <b>Peu_2</b> | CTGTCACAGC | GCTGCTTCCT | CAGGAAGTGC | TGGTGATAGT | TCTCCACCTT | ACTTTGATGT  | TGAGGTAGAT |           |           |           |
| <b>Peu_3</b> | CTGTCACAGC | GCTGCTTCCT | CAGGAAGTGC | TGGTGATAGT | TCTCCACCTT | ACTTTGATGT  | TGAGGTAGAT |           |           |           |
| <b>Peu_4</b> | CTGTCACAGC | GCTGCTTCCT | CAGGAAGTGC | TGGTGATAGT | TCTCCACCTT | ACTTTGATGT  | TGAGGTAGAT |           |           |           |
| <b>Peu_5</b> | CTGTCACAGC | GCTGCTTCCT | CAGGAAGTGC | TGGTGATAGT | TCTCCACCTT | ACTTTGATGT  | TGAGGTAGAT |           |           |           |
| <b>Ppr_1</b> | CTGTCACAGC | GCTGCTTCCT | CAGGAAGTGC | TGGTGATAGT | TCTCCACCTT | ACTTTGATGT  | TGAGGTAGAT |           |           |           |
| <b>Ppr_2</b> | CTGTCACAGC | GCTGCTTCCT | CAGGAAGTGC | TGGTGATAGT | TCTCCACCTT | ACTTTGATGT  | TGAGGTAGAT |           |           |           |
| <b>Ppr_3</b> | CTGTCACAGC | GCTGCTTCCT | CAGGAAGTGC | TGGTGATAGT | TCTCCACCTT | ACTTTGATGT  | TGAGGTAGAT |           |           |           |
| <b>Ppr_4</b> | CTGTCACAGC | GCTGCTTCCT | CAGGAAGTGC | TGGTGATAGT | TCTCCACCTT | ACTTTGATGT  | TGAGGTAGAT |           |           |           |
| <b>Ppr_5</b> | CTGTCACAGC | GCTGCTTCCT | CAGGAAGTGC | TGGTGATAGT | TCTCCACCTT | ACTTTGATGT  | TGAGGTAGAT |           |           |           |
|              | .... ....  | .... ....  | .... ....  | .... ....  | .... ....  | .... ....   | .... ....  | .... .... | .... .... | .... .... |
|              |            | 360        | 370        | 380        | 390        | 400         | 410        | 420       |           |           |

|       |            |            |            |             |            |            |            |
|-------|------------|------------|------------|-------------|------------|------------|------------|
| Peu_1 | GCAAGTTCCT | CTGCTGCTGC | CTCTGCTGCT | GCTATAAAAAG | AAGCTATGGA | GAAAGCTCAA | GTCAAGCTGA |
| Peu_2 | GCAAGTTCCT | CTGCTGCTGC | CTCTGCTGCT | GCTATAAAAAG | AAGCTATGGA | GAAAGCTCAA | GTCAAGCTGA |
| Peu_3 | GCAAGTTCCT | CTGCTGCTGC | CTCTGCTGCT | GCTATAAAAAG | AAGCTATGGA | GAAAGCTCAA | GTCAAGCTGA |
| Peu_4 | GCAAGTTCCT | CTGCTGCTGC | CTCTGCTGCT | GCTATAAAAAG | AAGCTATGGA | GAAAGCTCAA | GTCAAGCTGA |
| Peu_5 | GCAAGTTCCT | CTGCTGCTGC | CTCTGCTGCT | GCTATAAAAAG | AAGCTATGGA | GAAAGCTCAA | GTCAAGCTGA |
| Ppr_1 | GCAAGTTCCT | CTGCTGCTGC | CTCTGCTGCT | GCTATAAAAAG | AAGCTATGGA | GAAAGCTCAA | GTCAAGCTGA |
| Ppr_2 | GCAAGTTCCT | CTGCTGCTGC | CTCTGCTGCT | GCTATAAAAAG | AAGCTATGGA | GAAAGCTCAA | GTCAAGCTGA |
| Ppr_3 | GCAAGTTCCT | CTGCTGCTGC | CTCTGCTGCT | GCTATAAAAAG | AAGCTATGGA | GAAAGCTCAA | GTCAAGCTGA |
| Ppr_4 | GCAAGTTCCT | CTGCTGCTGC | CTCTGCTGCT | GCTATAAAAAG | AAGCTATGGA | GAAAGCTCAA | GTCAAGCTGA |
| Ppr_5 | GCAAGTTCCT | CTGCTGCTGC | CTCTGCTGCT | GCTATAAAAAG | AAGCTATGGA | GAAAGCTCAA | GTCAAGCTGA |

.....|.....| .....|.....| .....|.....| .....|.....| .....|.....| .....|.....|  
                  430                  440                  450                  460                  470                  480                  490

|       |            |            |            |            |             |            |            |
|-------|------------|------------|------------|------------|-------------|------------|------------|
| Peu_1 | AAAGTGCAAA | AGAATTGATG | GACAGGAAGA | GGGGTGGTTT | TCAAAAACCAT | ACAAAATCGG | CTTCAAAAAA |
| Peu_2 | AAAGTGCAAA | AGAATTGATG | GACAGGAAGA | GGGGTGGTTT | TCAAAAACCAT | ACAAAATCGG | CTTCAAAAAA |
| Peu_3 | AAAGTGCAAA | AGAATTGATG | GACAGGAAGA | GGGGTGGTTT | TCAAAAACCAT | ACAAAATCGG | CTTCAAAAAA |
| Peu_4 | AAAGTGCAAA | AGAATTGATG | GACAGGAAGA | GGGGTGGTTT | TCAAAAACCAT | ACAAAATCGG | CTTCAAAAAA |
| Peu_5 | AAAGTGCAAA | AGAATTGATG | GACAGGAAGA | GGGGTGGTTT | TCAAAAACCAT | ACAAAATCGG | CTTCAAAAAA |
| Ppr_1 | AAAGTGCAAA | AGAATTGATG | GACAGGAAGA | GGGGTGGTTT | TCAAAAACCAT | ACAAAATCGG | CTTCAAAAAA |
| Ppr_2 | AAAGTGCAAA | AGAATTGATG | GACAGGAAGA | GGGGTGGTTT | TCAAAAACCAT | ACAAAATCGG | CTTCAAAAAA |
| Ppr_3 | AAAGTGCAAA | AGAATTGATG | GACAGGAAGA | GGGGTGGTTT | TCAAAAACCAT | ACAAAATCGG | CTTCAAAAAA |
| Ppr_4 | AAAGTGCAAA | AGAATTGATG | GACAGGAAGA | GGGGTGGTTT | TCAAAAACCAT | ACAAAATCGG | CTTCAAAAAA |
| Ppr_5 | AAAGTGCAAA | AGAATTGATG | GACAGGAAGA | GGGGTGGTTT | TCAAAAACCAT | ACAAAATCGG | CTTCAAAAAA |

.....|.....| .....|.....| .....|.....| .....|.....| .....|.....| .....|.....|  
                  500                  510                  520                  530                  540                  550                  560

|       |            |            |            |            |            |            |            |
|-------|------------|------------|------------|------------|------------|------------|------------|
| Peu_1 | TGACAAAAAG | GATAGAGAAG | GTAGGGTGGT | TAAGATTGTT | GATGTGTCTG | GTAGTACAAA | ATATGAAGGG |
| Peu_2 | TGACAAAAAG | GATAGAGAAG | GTAGGGTGGT | TAAGATTGTT | GATGTGTCTG | GTAGTACAAA | ATATGAAGGG |
| Peu_3 | TGACAAAAAG | GATAGAGAAG | GTAGGGTGGT | TAAGATTGTT | GATGTGTCTG | GTAGTACAAA | ATATGAAGGG |
| Peu_4 | TGACAAAAAG | GATAGAGAAG | GTAGGGTGGT | TAAGATTGTT | GATGTGTCTG | GTAGTACAAA | ATATGAAGGG |
| Peu_5 | TGACAAAAAG | GATAGAGAAG | GTAGGGTGGT | TAAGATTGTT | GATGTGTCTG | GTAGTACAAA | ATATGAAGGG |
| Ppr_1 | TGACAAAAAG | GATAGAGAAG | GTAGGGTGGT | TAAGATTGTT | GATGTGTCTG | GTAGTACAAA | ATATGAAGGG |
| Ppr_2 | TGACAAAAAG | GATAGAGAAG | GTAGGGTGGT | TAAGATTGTT | GATGTGTCTG | GTAGTACAAA | ATATGAAGGG |
| Ppr_3 | TGACAAAAAG | GATAGAGAAG | GTAGGGTGGT | TAAGATTGTT | GATGTGTCTG | GTAGTACAAA | ATATGAAGGG |
| Ppr_4 | TGACAAAAAG | GATAGAGAAG | GTAGGGTGGT | TAAGATTGTT | GATGTGTCTG | GTAGTACAAA | ATATGAAGGG |
| Ppr_5 | TGACAAAAAG | GATAGAGAAG | GTAGGGTGGT | TAAGATTGTT | GATGTGTCTG | GTAGTACAAA | ATATGAAGGG |

.....|.....| .....|.....| .....|.....| .....|.....| .....|.....| .....|.....|  
                  570                  580                  590                  600                  610                  620                  630

|       |            |             |            |            |            |            |            |
|-------|------------|-------------|------------|------------|------------|------------|------------|
| Peu_1 | GTGCAAGGCA | CTTGTGAAAAG | TGAAGAGAAT | GGAATGGATG | ACAGGCWAAA | GGTTAAAATT | CCAGATTCTT |
| Peu_2 | GTGCAAGGCA | CTTGTGAAAAG | TGAAGAGAAT | GGAATGGATG | ACAGGCWAAA | GGTTAAAATT | CCAGATTCTT |
| Peu_3 | GTGCAAGGCA | CTTGTGAAAAG | TGAAGAGAAT | GGAATGGATG | ACAGGCWAAA | GGTTAAAATT | CCAGATTCTT |
| Peu_4 | GTGCAAGGCA | CTTGTGAAAAG | TGAAGAGAAT | GGAATGGATG | ACAGGCWAAA | GGTTAAAATT | CCAGATTCTT |
| Peu_5 | GTGCAAGGCA | CTTGTGAAAAG | TGAAGAGAAT | GGAATGGATG | ACAGGCWAAA | GGTTAAAATT | CCAGATTCTT |
| Ppr_1 | GTGCAAGGCA | CTTGTGAAAAG | TGAAGAGAAT | GGAATGGATG | ACAGGCWAAA | GGTTAAAATT | CCAGATTCTT |
| Ppr_2 | GTGCAAGGCA | CTTGTGAAAAG | TGAAGAGAAT | GGAATGGATG | ACAGGCWAAA | GGTTAAAATT | CCAGATTCTT |
| Ppr_3 | GTGCAAGGCA | CTTGTGAAAAG | TGAAGAGAAT | GGAATGGATG | ACAGGCWAAA | GGTTAAAATT | CCAGATTCTT |
| Ppr_4 | GTGCAAGGCA | CTTGTGAAAAG | TGAAGAGAAT | GGAATGGATG | ACAGGCWAAA | GGTTAAAATT | CCAGATTCTT |
| Ppr_5 | GTGCAAGGCA | CTTGTGAAAAG | TGAAGAGAAT | GGAATGGATG | ACAGGCWAAA | GGTTAAAATT | CCAGATTCTT |

.....|.....| .....|.....| .....|.....| .....|.....| .....|.....| .....|.....|  
                  640                  650                  660                  670                  680                  690                  700

|       |            |            |            |            |            |            |            |
|-------|------------|------------|------------|------------|------------|------------|------------|
| Peu_1 | TAGAAGGGAA | AAGGCATCAA | AATGCAGCAA | AAAAGTCTTC | TGATGAGAAG | CATGGAAGGG | AATCCTTGTC |
| Peu_2 | TAGAAGGGAA | AAGGCATCAA | AATGCAGCAA | AAAAGTCTTC | TGATGAGAAG | CATGGAAGGG | AATCCTTGTC |
| Peu_3 | TAGAAGGGAA | AAGGCATCAA | AATGCAGCAA | AAAAGTCTTC | TGATGAGAAG | CATGGAAGGG | AATCCTTGTC |
| Peu_4 | TAGAAGGGAA | AAGGCATCAA | AATGCAGCAA | AAAAGTCTTC | TGATGAGAAG | CATGGAAGGG | AATCCTTGTC |
| Peu_5 | TAGAAGGGAA | AAGGCATCAA | AATGCAGCAA | AAAAGTCTTC | TGATGAGAAG | CATGGAAGGG | AATCCTTGTC |
| Ppr_1 | TAGAAGGGAA | AAGGCATCAA | AATGCAGCAA | AAAAGTCTTC | TGATGAGAAG | CATGGAAGGG | AATCCTTGTC |
| Ppr_2 | TAGAAGGGAA | AAGGCATCAA | AATGCAGCAA | AAAAGTCTTC | TGATGAGAAG | CATGGAAGGG | AATCCTTGTC |
| Ppr_3 | TAGAAGGGAA | AAGGCATCAA | AATGCAGCAA | AAAAGTCTTC | TGATGAGAAG | CATGGAAGGG | AATCCTTGTC |
| Ppr_4 | TAGAAGGGAA | AAGGCATCAA | AATGCAGCAA | AAAAGTCTTC | TGATGAGAAG | CATGGAAGGG | AATCCTTGTC |
| Ppr_5 | TAGAAGGGAA | AAGGCATCAA | AATGCAGCAA | AAAAGTCTTC | TGATGAGAAG | CATGGAAGGG | AATCCTTGTC |

.....|.....| .....|.....| .....|.....| .....|.....| .....|.....| .....|.....|  
                  710                  720                  730                  740                  750                  760                  770

|       |            |            |            |             |            |            |            |
|-------|------------|------------|------------|-------------|------------|------------|------------|
| Peu_1 | ATCTCAAGGA | TCTGATAAAA | TTGATGAAGC | TAGTGAAATGG | AAAGAAGCTA | CTCAATTTTT | TGAACTGGTG |
| Peu_2 | ATCTCAAGGA | TCTGATAAAA | TTGATGAAGC | TAGTGAAATGG | AAAGAAGCTA | CTCAATTTTT | TGAACTGGTG |
| Peu_3 | ATCTCAAGGA | TCTGATAAAA | TTGATGAAGC | TAGTGAAATGG | AAAGAAGCTA | CTCAATTTTT | TGAACTGGTG |
| Peu_4 | ATCTCAAGGA | TCTGATAAAA | TTGATGAAGC | TAGTGAAATGG | AAAGAAGCTA | CTCAATTTTT | TGAACTGGTG |



|              |            |            |            |             |            |            |            |
|--------------|------------|------------|------------|-------------|------------|------------|------------|
| <b>Peu_5</b> | ATCTCAAGGA | TCTGATAAAA | TTGATGAAGC | TAGTGAAATGG | AAAGAAGCTA | CTCAATTTTT | TGAACTGGTG |
| <b>Ppr_1</b> | ATCTCAAGGA | TCTGATAAAA | TTGATGAAGC | TAGTGARTGG  | AAAGAAGCTA | CTCAATTTTT | TGAACTGGTG |
| <b>Ppr_2</b> | ATCTCAAGGA | TCTGATAAAA | TTGATGAAGC | TAGTGARTGG  | AAAGAAGCTA | CTCAATTTTT | TGAACTGGTG |
| <b>Ppr_3</b> | ATCTCAAGGA | TCTGATAAAA | TTGATGAAGC | TAGTGARTGG  | AAAGAAGCTA | CTCAATTTTT | TGAACTGGTG |
| <b>Ppr_4</b> | ATCTCAAGGA | TCTGATAAAA | TTGATGAAGC | TAGTGARTGG  | AAAGAAGCTA | CTCAATTTTT | TGAACTGGTG |
| <b>Ppr_5</b> | ATCTCAAGGA | TCTGATAAAA | TTGATGAAGC | TAGTGARTGG  | AAAGAAGCTA | CTCAATTTTT | TGAACTGGTG |

.....|.....| .....|.....| .....|.....| .....|.....| .....|.....| .....|.....| .....|.....|  
 780                    790                    800                    810                    820                    830                    840

|              |            |            |            |            |            |            |            |
|--------------|------------|------------|------------|------------|------------|------------|------------|
| <b>Peu_1</b> | AGAACAAATG | TACCCAGGAA | AGTCGTTGAC | TTGTCAAATA | ATGAAAACAT | TTTTCTGCAG | AACACAAATA |
| <b>Peu_2</b> | AGAACAAATG | TACCCAGGAA | AGTCGTTGAC | TTGTCAAATA | ATGAAAACAT | TTTTCTGCAG | AACACAAATA |
| <b>Peu_3</b> | AGAACAAATG | TACCCAGGAA | AGTCGTTGAC | TTGTCAAATA | ATGAAAACAT | TTTTCTGCAG | AACACAAATA |
| <b>Peu_4</b> | AGAACAAATG | TACCCAGGAA | AGTCGTTGAC | TTGTCAAATA | ATGAAAACAT | TTTTCTGCAG | AACACAAATA |
| <b>Peu_5</b> | AGAACAAATG | TACCCAGGAA | AGTCGTTGAC | TTGTCAAATA | ATGAAAACAT | TTTTCTGCAG | AACACAAATA |
| <b>Ppr_1</b> | AGAACAAATG | TACCCAGGAA | AGTCGTTGAC | TTGTCAAATA | ATGAAAACAT | TTTTCTGCAG | AACACAAATA |
| <b>Ppr_2</b> | AGAACAAATG | TACCCAGGAA | AGTCGTTGAC | TTGTCAAATA | ATGAAAACAT | TTTTCTGCAG | AACACAAATA |
| <b>Ppr_3</b> | AGAACAAATG | TACCCAGGAA | AGTCGTTGAC | TTGTCAAATA | ATGAAAACAT | TTTTCTGCAG | AACACAAATA |
| <b>Ppr_4</b> | AGAACAAATG | TACCCAGGAA | AGTCGTTGAC | TTGTCAAATA | ATGAAAACAT | TTTTCTGCAG | AACACAAATA |
| <b>Ppr_5</b> | AGAACAAATG | TACCCAGGAA | AGTCGTTGAC | TTGTCAAATA | ATGAAAACAT | TTTTCTGCAG | AACACAAATA |

.....|.....| .  
 850

|              |            |   |
|--------------|------------|---|
| <b>Peu_1</b> | TCCATGAACA | A |
| <b>Peu_2</b> | TCCATGAACA | A |
| <b>Peu_3</b> | TCCATGAACA | A |
| <b>Peu_4</b> | TCCATGAACA | A |
| <b>Peu_5</b> | TCCATGAACA | A |
| <b>Ppr_1</b> | TCCATGAACA | A |
| <b>Ppr_2</b> | TCCATGAACA | A |
| <b>Ppr_3</b> | TCCATGAACA | A |
| <b>Ppr_4</b> | TCCATGAACA | A |
| <b>Ppr_5</b> | TCCATGAACA | A |

Unigene38057\_All (with no lysine kinase)

|       |            |            |            |            |            |            |             |           |           |
|-------|------------|------------|------------|------------|------------|------------|-------------|-----------|-----------|
|       | .... ....  | .... ....  | .... ....  | .... ....  | .... ....  | .... ....  | .... ....   | .... .... | .... .... |
|       | 10         | 20         | 30         | 40         | 50         | 60         | 70          |           |           |
| Peu_1 | GTAACAAACC | CGGAGCTCTC | CTCCGTAACA | ATGGACGAAA | GCGCCTCTTA | TGACCCGACT | ATAAACCCACA |           |           |
| Peu_2 | GTAACAAACC | CGGAGCTCTC | CTCCGTAACA | ATGGACGAAA | GCGCCTCTTA | TGACCCGACT | ATAAACCCACA |           |           |
| Peu_3 | GTAACAAACC | CGGAGCTCTC | CTCCGTAACA | ATGGACGAAA | GCGCCTCTTA | TGACCCGACT | ATAAACCCACA |           |           |
| Peu_4 | GTAACAAACC | CGGAGCTCTC | CTCCGTAACA | ATGGACGAAA | GCGCCTCTTA | TGACCCGACT | ATAAACCCACA |           |           |
| Peu_5 | GTAACAAACC | CGGAGCTCTC | CTCCGTAACA | ATGGACGAAA | GCGCCTCTTA | TGACCCGACT | ATAAACCCACA |           |           |
| Ppr_1 | GTAACAAACC | AGGAGCTCTC | CTCCGTAACA | ATGGACGAAA | GCGCCTCTTA | TGACCCGACT | ATAAACCCACA |           |           |
| Ppr_2 | GTAACAAACC | AGGAGCTCTC | CTCCGTAACA | ATGGACGAAA | GCGCCTCTTA | TGACCCGACT | ATAAACCCACA |           |           |
| Ppr_3 | GTAACAAACC | AGGAGCTCTC | CTCCGTAACA | ATGGACGAAA | GCGCCTCTTA | TGACCCGACT | ATAAACCCACA |           |           |
| Ppr_4 | GTAACAAACC | AGGAGCTCTC | CTCCGTAACA | ATGGACGAAA | GCGCCTCTTA | TGACCCGACT | ATAAACCCACA |           |           |
| Ppr_5 | GTAACAAACC | AGGAGCTCTC | CTCCGTAACA | ATGGACGAAA | GCGCCTCTTA | TGACCCGACT | ATAAACCCACA |           |           |

|       |            |            |            |            |            |            |            |           |           |
|-------|------------|------------|------------|------------|------------|------------|------------|-----------|-----------|
|       | .... ....  | .... ....  | .... ....  | .... ....  | .... ....  | .... ....  | .... ....  | .... .... | .... .... |
|       | 80         | 90         | 100        | 110        | 120        | 130        | 140        |           |           |
| Peu_1 | TCTCCATGGA | AGAGCTAAAA | GTCTCCACCA | AGAACTTCTC | CACCGATTTA | ATCATCGGCG | ATGGCAGTTT |           |           |
| Peu_2 | TCTCCATGGA | AGAGCTAAAA | GTCTCCACCA | AGAACTTCTC | CACCGATTTA | ATCATCGGCG | ATGGCAGTTT |           |           |
| Peu_3 | TCTCCATGGA | AGAGCTAAAA | GTCTCCACCA | AGAACTTCTC | CACCGATTTA | ATCATCGGCG | ATGGCAGTTT |           |           |
| Peu_4 | TCTCCATGGA | AGAGCTAAAA | GTCTCCACCA | AGAACTTCTC | CACCGATTTA | ATCATCGGCG | ATGGCAGTTT |           |           |
| Peu_5 | TCTCCATGGA | AGAGCTAAAA | GTCTCCACCA | AGAACTTCTC | CACCGATTTA | ATCATCGGCG | ATGGCAGTTT |           |           |
| Ppr_1 | TCTCCATGGA | AGAGCTAAAA | GTCTCCACCA | AGAACTTCTC | CACCGATTTA | ATCATCGGCG | ATGGCAGTTT |           |           |
| Ppr_2 | TCTCCATGGA | AGAGCTAAAA | GTCTCCACCA | AGAACTTCTC | CACCGATTTA | ATCATCGGCG | ATGGCAGTTT |           |           |
| Ppr_3 | TCTCCATGGA | AGAGCTAAAA | GTCTCCACCA | AGAACTTCTC | CACCGATTTA | ATCATCGGCG | ATGGCAGTTT |           |           |
| Ppr_4 | TCTCCATGGA | AGAGCTAAAA | GTCTCCACCA | AGAACTTCTC | CACCGATTTA | ATCATCGGCG | ATGGCAGTTT |           |           |
| Ppr_5 | TCTCCATGGA | AGAGCTAAAA | GTCTCCACCA | AGAACTTCTC | CACCGATTTA | ATCATCGGCG | ATGGCAGTTT |           |           |

|       |            |            |            |            |            |            |            |           |           |
|-------|------------|------------|------------|------------|------------|------------|------------|-----------|-----------|
|       | .... ....  | .... ....  | .... ....  | .... ....  | .... ....  | .... ....  | .... ....  | .... .... | .... .... |
|       | 150        | 160        | 170        | 180        | 190        | 200        | 210        |           |           |
| Peu_1 | CGGCTTGGTT | TATAAAGCTG | CACTCTACAA | CGGCTCCACG | GTTGCTATTA | AAAAGCTTGA | CCCGGACGCT |           |           |
| Peu_2 | CGGCTTGGTT | TATAAAGCTG | CACTCTACAA | CGGCTCCACG | GTTGCTATTA | AAAAGCTTGA | CCCGGACGCT |           |           |
| Peu_3 | CGGCTTGGTT | TATAAAGCTG | CACTCTACAA | CGGCTCCACG | GTTGCTATTA | AAAAGCTTGA | CCCGGACGCT |           |           |
| Peu_4 | CGGCTTGGTT | TATAAAGCTG | CACTCTACAA | CGGCTCCACG | GTTGCTATTA | AAAAGCTTGA | CCCGGACGCT |           |           |
| Peu_5 | CGGCTTGGTT | TATAAAGCTG | CACTCTACAA | CGGCTCCACG | GTTGCTATTA | AAAAGCTTGA | CCCGGACGCT |           |           |
| Ppr_1 | CGGCTTGGTT | TATAAAGCTG | CACTCTACAA | CGGCTCCATG | GTTGCTATTA | AAAAGCTTGA | CCCGGACGCT |           |           |
| Ppr_2 | CGGCTTGGTT | TATAAAGCTG | CACTCTACAA | CGGCTCCATG | GTTGCTATTA | AAAAGCTTGA | CCCGGACGCT |           |           |
| Ppr_3 | CGGCTTGGTT | TATAAAGCTG | CACTCTACAA | CGGCTCCATG | GTTGCTATTA | AAAAGCTTGA | CCCGGACGCT |           |           |
| Ppr_4 | CGGCTTGGTT | TATAAAGCTG | CACTCTACAA | CGGCTCCATG | GTTGCTATTA | AAAAGCTTGA | CCCGGACGCT |           |           |
| Ppr_5 | CGGCTTGGTT | TATAAAGCTG | CACTCTACAA | CGGCTCCATG | GTTGCTATTA | AAAAGCTTGA | CCCGGACGCT |           |           |

|       |            |            |            |            |            |            |            |           |           |
|-------|------------|------------|------------|------------|------------|------------|------------|-----------|-----------|
|       | .... ....  | .... ....  | .... ....  | .... ....  | .... ....  | .... ....  | .... ....  | .... .... | .... .... |
|       | 220        | 230        | 240        | 250        | 260        | 270        | 280        |           |           |
| Peu_1 | TTTCAAGGTT | TTCGTGAGTT | TCGTGCCGAG | ATGGAGACTC | TAGGTCAGTT | ACGCCATGGA | AATATTGTCA |           |           |
| Peu_2 | TTTCAAGGTT | TTCGTGAGTT | TCGTGCCGAG | ATGGAGACTC | TAGGTCAGTT | ACGCCATGGA | AATATTGTCA |           |           |
| Peu_3 | TTTCAAGGTT | TTCGTGAGTT | TCGTGCCGAG | ATGGAGACTC | TAGGTCAGTT | ACGCCATGGA | AATATTGTCA |           |           |
| Peu_4 | TTTCAAGGTT | TTCGTGAGTT | TCGTGCCGAG | ATGGAGACTC | TAGGTCAGTT | ACGCCATGGA | AATATTGTCA |           |           |
| Peu_5 | TTTCAAGGTT | TTCGTGAGTT | TCGTGCCGAG | ATGGAGACTC | TAGGTCAGTT | ACGCCATGGA | AATATTGTCA |           |           |
| Ppr_1 | TTTCAAGGTT | TTCGTGAGTT | TCGTGCCGAG | ATGGAGACTC | TAGGTCAGTT | ACGCCATGGA | AATATTGTCA |           |           |
| Ppr_2 | TTTCAAGGTT | TTCGTGAGTT | TCGTGCCGAG | ATGGAGACTC | TAGGTCAGTT | ACGCCATGGA | AATATTGTCA |           |           |
| Ppr_3 | TTTCAAGGTT | TTCGTGAGTT | TCGTGCCGAG | ATGGAGACTC | TAGGTCAGTT | ACGCCATGGA | AATATTGTCA |           |           |
| Ppr_4 | TTTCAAGGTT | TTCGTGAGTT | TCGTGCCGAG | ATGGAGACTC | TAGGTCAGTT | ACGCCATGGA | AATATTGTCA |           |           |
| Ppr_5 | TTTCAAGGTT | TTCGTGAGTT | TCGTGCCGAG | ATGGAGACTC | TAGGTCAGTT | ACGCCATGGA | AATATTGTCA |           |           |

|       |            |            |            |            |            |            |            |           |           |
|-------|------------|------------|------------|------------|------------|------------|------------|-----------|-----------|
|       | .... ....  | .... ....  | .... ....  | .... ....  | .... ....  | .... ....  | .... ....  | .... .... | .... .... |
|       | 290        | 300        | 310        | 320        | 330        | 340        | 350        |           |           |
| Peu_1 | AGATTCTCGG | GTATTGTGTT | TCGGGTCGGG | ACCGGGTTTT | AATTCTGGAG | TTCGTTGAAA | GAGGGAGTCT |           |           |
| Peu_2 | AGATTCTCGG | GTATTGTGTT | TCGGGTCGGG | ACCGGGTTTT | AATTCTGGAG | TTCGTTGAAA | GAGGGAGTCT |           |           |
| Peu_3 | AGATTCTCGG | GTATTGTGTT | TCGGGTCGGG | ACCGGGTTTT | AATTCTGGAG | TTCGTTGAAA | GAGGGAGTCT |           |           |
| Peu_4 | AGATTCTCGG | GTATTGTGTT | TCGGGTCGGG | ACCGGGTTTT | AATTCTGGAG | TTCGTTGAAA | GAGGGAGTCT |           |           |
| Peu_5 | AGATTCTCGG | GTATTGTGTT | TCGGGTCGGG | ACCGGGTTTT | AATTCTGGAG | TTCGTTGAAA | GAGGGAGTCT |           |           |
| Ppr_1 | AGATTCTCGG | GTATTGTGTT | TCGGGTCGGG | ACCGGGTTTT | AATTCTGGAG | TTCGTTGAAA | GAGGGAGTCT |           |           |
| Ppr_2 | AGATTCTCGG | GTATTGTGTT | TCGGGTCGGG | ACCGGGTTTT | AATTCTGGAG | TTCGTTGAAA | GAGGGAGTCT |           |           |
| Ppr_3 | AGATTCTCGG | GTATTGTGTT | TCGGGTCGGG | ACCGGGTTTT | AATTCTGGAG | TTCGTTGAAA | GAGGGAGTCT |           |           |
| Ppr_4 | AGATTCTCGG | GTATTGTGTT | TCGGGTCGGG | ACCGGGTTTT | AATTCTGGAG | TTCGTTGAAA | GAGGGAGTCT |           |           |

Ppr\_5 AGATTCTCGG GTATTGTGTT TCGGGTCGGG ACCGGGTTTT AATTCTGGAG TTCGTTGAAA GAGGGAGTCT

.....|.....|.....|.....|.....|.....|.....|.....|.....|.....|.....|.....|.....|.....|.....|.....|

360 370 380 390 400 410 420

Peu\_1 TGACCAGTGG ATTCACGACA CATCATCAAT GGATAACGAT CACTGTGATA AGTITCCCATT ACCCTGGGAG

Peu\_2 TGACCAGTGG ATTCACGACA CATCATCAAT GGATAACGAT CACTGTGATA AGTITCCCATT ACCCTGGGAG

Peu\_3 TGACCAGTGG ATTCACGACA CATCATCAAT GGATAACGAT CACTGTGATA AGTITCCCATT ACCCTGGGAG

Peu\_4 TGACCAGTGG ATTCACGACA CATCATCAAT GGATAACGAT CACTGTGATA AGTITCCCATT ACCCTGGGAG

Peu\_5 TGACCAGTGG ATTCACGACA CATCATCAAT GGATAACGAT CACTGTGATA AGTITCCCATT ACCCTGGGAG

Ppr\_1 TGACCAGTGG ATTCACGACA CATCATCAAT GGATAACGAT CACTATGATA AGCTCCCATT ACCCTGGGAC

Ppr\_2 TGACCAGTGG ATTCACGACA CATCATCAAT GGATAACGAT CACTATGATA AGCTCCCATT ACCCTGGGAC

Ppr\_3 TGACCAGTGG ATTCACGACA CATCATCAAT GGATAACGAT CACTATGATA AGCTCCCATT ACCCTGGGAC

Ppr\_4 TGACCAGTGG ATTCACGACA CATCATCAAT GGATAACGAT CACTATGATA AGCTCCCATT ACCCTGGGAC

Ppr\_5 TGACCAGTGG ATTCACGACA CATCATCAAT GGATAACGAT CACTATGATA AGCTCCCATT ACCCTGGGAC

.....|.....|.....|.....|.....|.....|.....|.....|.....|.....|.....|.....|.....|.....|.....|.....|

430 440 450 460 470 480 490

Peu\_1 ACGAGGATCA AGATTGTTAT GGGCGTGGCC AATGGGCTTG CTTATTTGCA TGGGCTTGAT ACTCCCATTA

Peu\_2 ACGAGGATCA AGATTGTTAT GGGCGTGGCC AATGGGCTTG CTTATTTGCA TGGGCTTGAT ACTCCCATTA

Peu\_3 ACGAGGATCA AGATTGTTAT GGGCGTGGCC AATGGGCTTG CTTATTTGCA TGGGCTTGAT ACTCCCATTA

Peu\_4 ACGAGGATCA AGATTGTTAT GGGCGTGGCC AATGGGCTTG CTTATTTGCA TGGGCTTGAT ACTCCCATTA

Peu\_5 ACGAGGATCA AGATTGTTAT GGGCGTGGCC AATGGGCTTG CTTATTTGCA TGGGCTTGAT ACTCCCATTA

Ppr\_1 ACGAGGATCA AGATAGTTAT GGGCGTGGCC AATGGGCTTG CTTATTTGCA TGGGCTTGAT ACTCCCATTA

Ppr\_2 ACGAGGATCA AGATAGTTAT GGGCGTGGCC AATGGGCTTG CTTATTTGCA TGGGCTTGAT ACTCCCATTA

Ppr\_3 ACGAGGATCA AGATAGTTAT GGGCGTGGCC AATGGGCTTG CTTATTTGCA TGGGCTTGAT ACTCCCATTA

Ppr\_4 ACGAGGATCA AGATAGTTAT GGGCGTGGCC AATGGGCTTG CTTATTTGCA TGGGCTTGAT ACTCCCATTA

Ppr\_5 ACGAGGATCA AGATAGTTAT GGGCGTGGCC AATGGGCTTG CTTATTTGCA TGGGCTTGAT ACTCCCATTA

.....|.....|.....|.....|.....|.....|.....|.....|.....|.....|.....|.....|.....|.....|.....|.....|

500 510 520 530 540 550 560

Peu\_1 TTCATAGGGA TATTAAGGCT AGTAACGTTT TGTTGGACTC GAGCTTTCAG GCCCATATCT CTGATTTTGG

Peu\_2 TTCATAGGGA TATTAAGGCT AGTAACGTTT TGTTGGACTC GAGCTTTCAG GCCCATATCT CTGATTTTGG

Peu\_3 TTCATAGGGA TATTAAGGCT AGTAACGTTT TGTTGGACTC GAGCTTTCAG GCCCATATCT CTGATTTTGG

Peu\_4 TTCATAGGGA TATTAAGGCT AGTAACGTTT TGTTGGACTC GAGCTTTCAG GCCCATATCT CTGATTTTGG

Peu\_5 TTCATAGGGA TATTAAGGCT AGTAACGTTT TGTTGGACTC GAGCTTTCAG GCCCATATCT CTGATTTTGG

Ppr\_1 TTCATAGGGA TATTAAGGCT AGTAACGTTT TGTTGGACTC GAGCTTTCAG GCCCATATCT CTGATTTTGG

Ppr\_2 TTCATAGGGA TATTAAGGCT AGTAACGTTT TGTTGGACTC GAGCTTTCAG GCCCATATCT CTGATTTTGG

Ppr\_3 TTCATAGGGA TATTAAGGCT AGTAACGTTT TGTTGGACTC GAGCTTTCAG GCCCATATCT CTGATTTTGG

Ppr\_4 TTCATAGGGA TATTAAGGCT AGTAACGTTT TGTTGGACTC GAGCTTTCAG GCCCATATCT CTGATTTTGG

Ppr\_5 TTCATAGGGA TATTAAGGCT AGTAACGTTT TGTTGGACTC GAGCTTTCAG GCCCATATCT CTGATTTTGG

.....|.....|

570

Peu\_1 GCTTGCCCGT

Peu\_2 GCTTGCCCGT

Peu\_3 GCTTGCCCGT

Peu\_4 GCTTGCCCGT

Peu\_5 GCTTGCCCGT

Ppr\_1 GCTTGCCCGT

Ppr\_2 GCTTGCCCGT

Ppr\_3 GCTTGCCCGT

Ppr\_4 GCTTGCCCGT

Ppr\_5 GCTTGCCCGT

Unigene7669\_All (ATSIK; ATP binding / kinase/ protein kinase/ protein tyrosine kinase)

```

.....|.....| .....|.....| .....|.....| .....|.....| .....|.....| .....|.....|
      10          20          30          40          50          60          70
Peu_1 AAACAGGTGG GAATTGTAGG GTTATATGGA ATGGGGGGTG TCGGAAAAAC TACCCTCTTG ACTCAAATCA
Peu_2 AAACAGGTGG GAATTGTAGG GTTATATGGA ATGGGGGGTG TCGGAAAAAC TACCCTCTTG ACTCAAATCA
Peu_3 AAACAGGTGG GAATTGTAGG GTTATATGGA ATGGGGGGTG TCGGAAAAAC TACCCTCTTG ACTCAAATCA
Peu_4 AAACAGGTGG GAATTGTAGG GTTATATGGA ATGGGGGGTG TCGGAAAAAC TACCCTCTTG ACTCAAATCA
Peu_5 AAACAGGTGG GAATTGTAGG GTTATATGGA ATGGGGGGTG TCGGAAAAAC TACCCTCTTG ACTCAAATCA
Ppr_1 AAACAGGTGG GAATTGTAGG GTTATATGGA ATGGGGGGTG TCGGAAAAAC TACCCTCTTG ACTCAAATCA
Ppr_2 AAACAGGTGG GAATTGTAGG GTTATATGGA ATGGGGGGTG TCGGAAAAAC TACCCTCTTG ACTCAAATCA

```

```

.....|.....| .....|.....| .....|.....| .....|.....| .....|.....| .....|.....|
      80          90          100         110         120         130         140
Peu_1 ACAACGAGTC TCTCAAGACA CTCGATTATT TTGATATTGT GATATGGGTA GTGGTGTCAA AAGATTTGAA
Peu_2 ACAACGAGTC TCTCAAGACA CTCGATTATT TTGATATTGT GATATGGGTA GTGGTGTCAA AAGATTTGAA
Peu_3 ACAACGAGTC TCTCAAGACA CTCGATTATT TTGATATTGT GATATGGGTA GTGGTGTCAA AAGATTTGAA
Peu_4 ACAACGAGTC TCTCAAGACA CTCGATTATT TTGATATTGT GATATGGGTA GTGGTGTCAA AAGATTTGAA
Peu_5 ACAACGAGTC TCTCAAGACA CTCGATTATT TTGATATTGT GATATGGGTA GTGGTGTCAA AAGATTTGAA
Ppr_1 ACAACGAGTC TCTCAAGACA CTCGATTATT TTGATATTGT GATATGGGTA GTGGTGTCAA AAGATTTGAA
Ppr_2 ACAACGAGTC TCTCAAGACA CTCGATTATT TTGATATTGT GATATGGGTA GTGGTGTCAA AAGATTTGAA

```

```

.....|.....| .....|.....| .....|.....| .....|.....| .....|.....| .....|.....|
     150         160         170         180         190         200         210
Peu_1 ACTTAACACT ATTCAAGAAA GCATAGGGAG AAAAAATAGGC TGTTCCTGATG ATTTGTGGAA GAATAAAAAGC
Peu_2 ACTTAACACT ATTCAAGAAA GCATAGGGAG AAAAAATAGGC TGTTCCTGATG ATTTGTGGAA GAATAAAAAGC
Peu_3 ACTTAACACT ATTCAAGAAA GCATAGGGAG AAAAAATAGGC TGTTCCTGATG ATTTGTGGAA GAATAAAAAGC
Peu_4 ACTTAACACT ATTCAAGAAA GCATAGGGAG AAAAAATAGGC TGTTCCTGATG ATTTGTGGAA GAATAAAAAGC
Peu_5 ACTTAACACT ATTCAAGAAA GCATAGGGAG AAAAAATAGGC TGTTCCTGATG ATTTGTGGAA GAATAAAAAGC
Ppr_1 ACTTAACACT ATTCAAGAAA GCATAGGGAG AAAAAATAGGC TGTTCCTGATG ATTTGTGGAA GAATAAAAAGC
Ppr_2 ACTTAACACT ATTCAAGAAA GCATAGGGAG AAAAAATAGGC TGTTCCTGATG ATTTGTGGAA GAATAAAAAGC

```

```

.....|.....| .....|.....| .....|.....| .....|.....| .....|.....| .....|.....|
     220         230         240         250         260         270         280
Peu_1 CTTGACGAAA AATCTGTGGA CATATTTACT GCCTTTCGCC ATAAAAGGTT TGTGATGTTG TTGGATGATA
Peu_2 CTTGACGAAA AATCTGTGGA CATATTTACT GCCTTTCGCC ATAAAAGGTT TGTGATGTTG TTGGATGATA
Peu_3 CTTGACGAAA AATCTGTGGA CATATTTACT GCCTTTCGCC ATAAAAGGTT TGTGATGTTG TTGGATGATA
Peu_4 CTTGACGAAA AATCTGTGGA CATATTTACT GCCTTTCGCC ATAAAAGGTT TGTGATGTTG TTGGATGATA
Peu_5 CTTGACGAAA AATCTGTGGA CATATTTACT GCCTTTCGCC ATAAAAGGTT TGTGATGTTG TTGGATGATA
Ppr_1 CTTGACGAAA AAGCTGTGGA CATATTTACT GCCTTACGCC ATAAAAGGTT TGTGATGTTG TTGGATGATA
Ppr_2 CTTGACGAAA AAGCTGTGGA CATATTTACT GCCTTACGCC ATAAAAGGTT TGTGATGTTG TTGGATGATA

```

```

.....|.....| .....|.....| .....|.....| .....|.....| .....|.....| .....|.....|
     290         300         310         320         330         340         350
Peu_1 TCTGGGAGAG GTTTGATTTA AAAAAACTTG GAGTTCCTCT TCCTGATATG AAAAAACGGTT CCAAGGTAGT
Peu_2 TCTGGGAGAG GTTTGATTTA AAAAAACTTG GAGTTCCTCT TCCTGATATG AAAAAACGGTT CCAAGGTAGT
Peu_3 TCTGGGAGAG GTTTGATTTA AAAAAACTTG GAGTTCCTCT TCCTGATATG AAAAAACGGTT CCAAGGTAGT
Peu_4 TCTGGGAGAG GTTTGATTTA AAAAAACTTG GAGTTCCTCT TCCTGATATG AAAAAACGGTT CCAAGGTAGT
Peu_5 TCTGGGAGAG GTTTGATTTA AAAAAACTTG GAGTTCCTCT TCCTGATATG AAAAAACGGTT CCAAGGTAGT
Ppr_1 TCTGGGAGAG GTTTGATTTA AAAAAACTTG GAGTTCCTCT TCCTGATATG AAAAAACGGTT CCAAGGTAGT
Ppr_2 TCTGGGAGAG GTTTGATTTA AAAAAACTTG GAGTTCCTCT TCCTGATATG AAAAAACGGTT CCAAGGTAGT

```

.....|....

```

Peu_1 TTTCACAA
Peu_2 TTTCACAA
Peu_3 TTTCACAA
Peu_4 TTTCACAA
Peu_5 TTTCACAA
Ppr_1 TTTCACAA
Ppr_2 TTTCACAA

```

Unigene25055\_All (twin LOV protein 1)

|              |            |            |            |            |            |            |            |
|--------------|------------|------------|------------|------------|------------|------------|------------|
|              | .... ....  | .... ....  | .... ....  | .... ....  | .... ....  | .... ....  | .... ....  |
|              | 10         | 20         | 30         | 40         | 50         | 60         | 70         |
| <b>Peu_1</b> | TCTCTCCATC | TCCAGTTTTT | TATGCTAGAA | ATAAATTAAG | AGGAAATTGA | GTTGCCATTT | TAGGCCATCT |
| <b>Peu_2</b> | TCTCTCCATC | TCCAGTTTTT | TATGCTAGAA | ATAAATTAAG | AGGAAATTGA | GTTGCCATTT | TAGGCCATCT |
| <b>Peu_3</b> | TCTCTCCATC | TCCAGTTTTT | TATGCTAGAA | ATAAATTAAG | AGGAAATTGA | GTTGCCATTT | TAGGCCATCT |
| <b>Peu_4</b> | TCTCTCCATC | TCCAGTTTTT | TATGCTAGAA | ATAAATTAAG | AGGAAATTGA | GTTGCCATTT | TAGGCCATCT |
| <b>Peu_5</b> | TCTCTCCATC | TCCAGTTTTT | TATGCTAGAA | ATAAATTAAG | AGGAAATTGA | GTTGCCATTT | TAGGCCATCT |
| <b>Ppr_1</b> | TCTCTCCATC | TCCAGTTTTT | TATGCTAGAA | ATAAATTAAG | AGGAAATTGG | GTTGCCATTT | TAGGCCATCT |
| <b>Ppr_2</b> | TCTCTCCATC | TCCAGTTTTT | TATGCTAGAA | ATAAATTAAG | AGGAAATTGG | GTTGCCATTT | TAGGCCATCT |
| <b>Ppr_3</b> | TCTCTCCATC | TCCAGTTTTT | TATGCTAGAA | ATAAATTAAG | AGGAAATTGG | GTTGCCATTT | TAGGCCATCT |
| <b>Ppr_4</b> | TCTCTCCATC | TCCAGTTTTT | TATGCTAGAA | ATAAATTAAG | AGGAAATTGG | GTTGCCATTT | TAGGCCATCT |
| <b>Ppr_5</b> | TCTCTCCATC | TCCAGTTTTT | TATGCTAGAA | ATAAATTAAG | AGGAAATTGG | GTTGCCATTT | TAGGCCATCT |

|              |            |             |            |            |            |            |            |
|--------------|------------|-------------|------------|------------|------------|------------|------------|
|              | .... ....  | .... ....   | .... ....  | .... ....  | .... ....  | .... ....  | .... ....  |
|              | 80         | 90          | 100        | 110        | 120        | 130        | 140        |
| <b>Peu_1</b> | GGATACGGAA | TCCAGACCCCT | TTTATTGTAT | TTTATTTCTT | ACAATATGTG | CGATAATTAT | ACTGTATTTA |
| <b>Peu_2</b> | GGATACGGAA | TCCAGACCCCT | TTTATTGTAT | TTTATTTCTT | ACAATATGTG | CGATAATTAT | ACTGTATTTA |
| <b>Peu_3</b> | GGATACGGAA | TCCAGACCCCT | TTTATTGTAT | TTTATTTCTT | ACAATATGTG | CGATAATTAT | ACTGTATTTA |
| <b>Peu_4</b> | GGATACGGAA | TCCAGACCCCT | TTTATTGTAT | TTTATTTCTT | ACAATATGTG | CGATAATTAT | ACTGTATTTA |
| <b>Peu_5</b> | GGATACGGAA | TCCAGACCCCT | TTTATTGTAT | TTTATTTCTT | ACAATATGTG | CGATAATTAT | ACTGTATTTA |
| <b>Ppr_1</b> | GGATACGGAA | TCCAGACCCCT | TTTATTGTAT | TTTATTTCTT | ACAATATGTG | CGATAATTAT | ACTGTATTTA |
| <b>Ppr_2</b> | GGATACGGAA | TCCAGACCCCT | TTTATTGTAT | TTTATTTCTT | ACAATATGTG | CGATAATTAT | ACTGTATTTA |
| <b>Ppr_3</b> | GGATACGGAA | TCCAGACCCCT | TTTATTGTAT | TTTATTTCTT | ACAATATGTG | CGATAATTAT | ACTGTATTTA |
| <b>Ppr_4</b> | GGATACGGAA | TCCAGACCCCT | TTTATTGTAT | TTTATTTCTT | ACAATATGTG | CGATAATTAT | ACTGTATTTA |
| <b>Ppr_5</b> | GGATACGGAA | TCCAGACCCCT | TTTATTGTAT | TTTATTTCTT | ACAATATGTG | CGATAATTAT | ACTGTATTTA |

|              |            |            |            |            |            |            |            |
|--------------|------------|------------|------------|------------|------------|------------|------------|
|              | .... ....  | .... ....  | .... ....  | .... ....  | .... ....  | .... ....  | .... ....  |
|              | 150        | 160        | 170        | 180        | 190        | 200        | 210        |
| <b>Peu_1</b> | CATTATTAAT | GATATTTGCT | TTTGGGCATG | ACAGAATCGA | AGAAAGTACG | TGTAGATTTA | CCTCCTGAAC |
| <b>Peu_2</b> | CATTATTAAT | GATATTTGCT | TTTGGGCATG | ACAGAATCGA | AGAAAGTACG | TGTAGATTTA | CCTCCTGAAC |
| <b>Peu_3</b> | CATTATTAAT | GATATTTGCT | TTTGGGCATG | ACAGAATCGA | AGAAAGTACG | TGTAGATTTA | CCTCCTGAAC |
| <b>Peu_4</b> | CATTATTAAT | GATATTTGCT | TTTGGGCATG | ACAGAATCGA | AGAAAGTACG | TGTAGATTTA | CCTCCTGAAC |
| <b>Peu_5</b> | CATTATTAAT | GATATTTGCT | TTTGGGCATG | ACAGAATCGA | AGAAAGTACG | TGTAGATTTA | CCTCCTGAAC |
| <b>Ppr_1</b> | CATTATTAAT | GATATTTGCT | TTTGGGCGTG | ACAGAATCGA | AGAAAGTACG | TGTAGATTTG | CCTCCTGAAC |
| <b>Ppr_2</b> | CATTATTAAT | GATATTTGCT | TTTGGGCGTG | ACAGAATCGA | AGAAAGTACG | TGTAGATTTG | CCTCCTGAAC |
| <b>Ppr_3</b> | CATTATTAAT | GATATTTGCT | TTTGGGCGTG | ACAGAATCGA | AGAAAGTACG | TGTAGATTTG | CCTCCTGAAC |
| <b>Ppr_4</b> | CATTATTAAT | GATATTTGCT | TTTGGGCGTG | ACAGAATCGA | AGAAAGTACG | TGTAGATTTG | CCTCCTGAAC |
| <b>Ppr_5</b> | CATTATTAAT | GATATTTGCT | TTTGGGCGTG | ACAGAATCGA | AGAAAGTACG | TGTAGATTTG | CCTCCTGAAC |

|              |            |            |            |            |            |            |            |
|--------------|------------|------------|------------|------------|------------|------------|------------|
|              | .... ....  | .... ....  | .... ....  | .... ....  | .... ....  | .... ....  | .... ....  |
|              | 220        | 230        | 240        | 250        | 260        | 270        | 280        |
| <b>Peu_1</b> | TTTGTGACGT | AATTTTATCT | CCAGTATCAA | TCAGCACTCT | TTATTCTTAT | ACATTTATCC | CATCAATAAT |
| <b>Peu_2</b> | TTTGTGACGT | AATTTTATCT | CCAGTATCAA | TCAGCACTCT | TTATTCTTAT | ACATTTATCC | CATCAATAAT |
| <b>Peu_3</b> | TTTGTGACGT | AATTTTATCT | CCAGTATCAA | TCAGCACTCT | TTATTCTTAT | ACATTTATCC | CATCAATAAT |
| <b>Peu_4</b> | TTTGTGACGT | AATTTTATCT | CCAGTATCAA | TCAGCACTCT | TTATTCTTAT | ACATTTATCC | CATCAATAAT |
| <b>Peu_5</b> | TTTGTGACGT | AATTTTATCT | CCAGTATCAA | TCAGCACTCT | TTATTCTTAT | ACATTTATCC | CATCAATAAT |
| <b>Ppr_1</b> | TTTGTGAYGT | AATTTTATCT | CCAGTATCAA | TCAGCACTCT | TTATTCTTAT | ACATTTATCC | CATCAATAAT |
| <b>Ppr_2</b> | TTTGTGAYGT | AATTTTATCT | CCAGTATCAA | TCAGCACTCT | TTATTCTTAT | ACATTTATCC | CATCAATAAT |
| <b>Ppr_3</b> | TTTGTGAYGT | AATTTTATCT | CCAGTATCAA | TCAGCACTCT | TTATTCTTAT | ACATTTATCC | CATCAATAAT |
| <b>Ppr_4</b> | TTTGTGAYGT | AATTTTATCT | CCAGTATCAA | TCAGCACTCT | TTATTCTTAT | ACATTTATCC | CATCAATAAT |
| <b>Ppr_5</b> | TTTGTGAYGT | AATTTTATCT | CCAGTATCAA | TCAGCACTCT | TTATTCTTAT | ACATTTATCC | CATCAATAAT |

|              |            |            |            |            |            |            |            |
|--------------|------------|------------|------------|------------|------------|------------|------------|
|              | .... ....  | .... ....  | .... ....  | .... ....  | .... ....  | .... ....  | .... ....  |
|              | 290        | 300        | 310        | 320        | 330        | 340        | 350        |
| <b>Peu_1</b> | GCATCGACTA | GAGTCCCTGC | TTATTGCTGT | CAACTTAAAG | AAGATGCATT | CGGATCATTG | CATGCAAAAT |
| <b>Peu_2</b> | GCATCGACTA | GAGTCCCTGC | TTATTGCTGT | CAACTTAAAG | AAGATGCATT | CGGATCATTG | CATGCAAAAT |
| <b>Peu_3</b> | GCATCGACTA | GAGTCCCTGC | TTATTGCTGT | CAACTTAAAG | AAGATGCATT | CGGATCATTG | CATGCAAAAT |
| <b>Peu_4</b> | GCATCGACTA | GAGTCCCTGC | TTATTGCTGT | CAACTTAAAG | AAGATGCATT | CGGATCATTG | CATGCAAAAT |
| <b>Peu_5</b> | GCATCGACTA | GAGTCCCTGC | TTATTGCTGT | CAACTTAAAG | AAGATGCATT | CGGATCATTG | CATGCAAAAT |
| <b>Ppr_1</b> | GCATCGACTA | GAGTCCCTGC | TTATTGCTGT | CAACTTAAAG | AAGATGCATT | CGGATCATTG | CATGCAAAAT |
| <b>Ppr_2</b> | GCATCGACTA | GAGTCCCTGC | TTATTGCTGT | CAACTTAAAG | AAGATGCATT | CGGATCATTG | CATGCAAAAT |
| <b>Ppr_3</b> | GCATCGACTA | GAGTCCCTGC | TTATTGCTGT | CAACTTAAAG | AAGATGCATT | CGGATCATTG | CATGCAAAAT |
| <b>Ppr_4</b> | GCATCGACTA | GAGTCCCTGC | TTATTGCTGT | CAACTTAAAG | AAGATGCATT | CGGATCATTG | CATGCAAAAT |

Ppr\_5 GCATCGACTA GAGTCCCTGC TTATTGCTGT CAACTTAAAG AAGATGCATT CGGATCATTG CATGCAAAAT  
.....|.....| .....|.....| .....|.....| .....|.....| .....|.....| .....|.....| .....|.....|  
                  360                  370                  380                  390                  400                  410                  420  
Peu\_1 GTTGATATTC CAGCCATGAA GGTAATTTAT TCCGACTCTA ATTATGCCAA ATGTTTTGTT TTTTGGACTT  
Peu\_2 GTTGATATTC CAGCCATGAA GGTAATTTAT TCCGACTCTA ATTATGCCAA ATGTTTTGTT TTTTGGACTT  
Peu\_3 GTTGATATTC CAGCCATGAA GGTAATTTAT TCCGACTCTA ATTATGCCAA ATGTTTTGTT TTTTGGACTT  
Peu\_4 GTTGATATTC CAGCCATGAA GGTAATTTAT TCCGACTCTA ATTATGCCAA ATGTTTTGTT TTTTGGACTT  
Peu\_5 GTTGATATTC CAGCCATGAA GGTAATTTAT TCCGACTCTA ATTATGCCAA ATGTTTTGTT TTTTGGACTT  
Ppr\_1 GTTGATATTC CAGCCATGAA GGTAATTTAT TCCGACTCTA ATTATGCCAA ATGTTTTGTT TTTTGGACTT  
Ppr\_2 GTTGATATTC CAGCCATGAA GGTAATTTAT TCCGACTCTA ATTATGCCAA ATGTTTTGTT TTTTGGACTT  
Ppr\_3 GTTGATATTC CAGCCATGAA GGTAATTTAT TCCGACTCTA ATTATGCCAA ATGTTTTGTT TTTTGGACTT  
Ppr\_4 GTTGATATTC CAGCCATGAA GGTAATTTAT TCCGACTCTA ATTATGCCAA ATGTTTTGTT TTTTGGACTT  
Ppr\_5 GTTGATATTC CAGCCATGAA GGTAATTTAT TCCGACTCTA ATTATGCCAA ATGTTTTGTT TTTTGGACTT

.....|.....| .....|.....| .....|.....| .....|.....| .....|.....| .....|.....| .....|.....|  
                  430                  440                  450                  460                  470                  480                  490  
Peu\_1 GTACTGACCA AACTTTATTA TATGGTAGGT ATTGGAAGCA ATTACCACAA AGAAGTGCCA GGAGAAATTT  
Peu\_2 GTACTGACCA AACTTTATTA TATGGTAGGT ATTGGAAGCA ATTACCACAA AGAAGTGCCA GGAGAAATTT  
Peu\_3 GTACTGACCA AACTTTATTA TATGGTAGGT ATTGGAAGCA ATTACCACAA AGAAGTGCCA GGAGAAATTT  
Peu\_4 GTACTGACCA AACTTTATTA TATGGTAGGT ATTGGAAGCA ATTACCACAA AGAAGTGCCA GGAGAAATTT  
Peu\_5 GTACTGACCA AACTTTATTA TATGGTAGGT ATTGGAAGCA ATTACCACAA AGAAGTGCCA GGAGAAATTT  
Ppr\_1 GTACTGACCA AACTTTATTA TATGGTAGGT ATTGGAAGCA ATTACCACAA AGAAGTGCCA GGAGAAATTT  
Ppr\_2 GTACTGACCA AACTTTATTA TATGGTAGGT ATTGGAAGCA ATTACCACAA AGAAGTGCCA GGAGAAATTT  
Ppr\_3 GTACTGACCA AACTTTATTA TATGGTAGGT ATTGGAAGCA ATTACCACAA AGAAGTGCCA GGAGAAATTT  
Ppr\_4 GTACTGACCA AACTTTATTA TATGGTAGGT ATTGGAAGCA ATTACCACAA AGAAGTGCCA GGAGAAATTT  
Ppr\_5 GTACTGACCA AACTTTATTA TATGGTAGGT ATTGGAAGCA ATTACCACAA AGAAGTGCCA GGAGAAATTT

.....|.....| .....|.....| ..  
                  500                  510  
Peu\_1 CATTTGGAAT CCTTAGAAAC TC  
Peu\_2 CATTTGGAAT CCTTAGAAAC TC  
Peu\_3 CATTTGGAAT CCTTAGAAAC TC  
Peu\_4 CATTTGGAAT CCTTAGAAAC TC  
Peu\_5 CATTTGGAAT CCTTAGAAAC TC  
Ppr\_1 CATTTGGAAT CCTTAGAAAC TC  
Ppr\_2 CATTTGGAAT CCTTAGAAAC TC  
Ppr\_3 CATTTGGAAT CCTTAGAAAC TC  
Ppr\_4 CATTTGGAAT CCTTAGAAAC TC  
Ppr\_5 CATTTGGAAT CCTTAGAAAC TC

|              |            |            |            |            |            |            |            |           |           |
|--------------|------------|------------|------------|------------|------------|------------|------------|-----------|-----------|
|              | .... ....  | .... ....  | .... ....  | .... ....  | .... ....  | .... ....  | .... ....  | .... .... | .... .... |
|              | 10         | 20         | 30         | 40         | 50         | 60         | 70         |           |           |
| <b>Peu_1</b> | TCCAGAAGTC | CCGCTCTTTC | TATCCACTCG | TTATCTTCCT | CCAGCTCCCC | TCCTRCCTCC | AAAGAAGAAG |           |           |
| <b>Peu_2</b> | TCCAGAAGTC | CCGCTCTTTC | TATCCACTCG | TTATCTTCCT | CCAGCTCCCC | TCCTRCCTCC | AAAGAAGAAG |           |           |
| <b>Peu_3</b> | TCCAGAAGTC | CCGCTCTTTC | TATCCACTCG | TTATCTTCCT | CCAGCTCCCC | TCCTRCCTCC | AAAGAAGAAG |           |           |
| <b>Peu_4</b> | TCCAGAAGTC | CCGCTCTTTC | TATCCACTCG | TTATCTTCCT | CCAGCTCCCC | TCCTRCCTCC | AAAGAAGAAG |           |           |
| <b>Peu_5</b> | TCCAGAAGTC | CCGCTCTTTC | TATCCACTCG | TTATCTTCCT | CCAGCTCCCC | TCCTRCCTCC | AAAGAAGAAG |           |           |
| <b>Ppr_1</b> | TCCAGAAGTC | CCGCTCTTTC | TATCCACTCS | TTATCTTCCT | CCAGCTCCCC | TCCTACCTCC | AAAGAAGAAG |           |           |
| <b>Ppr_2</b> | TCCAGAAGTC | CCGCTCTTTC | TATCCACTCS | TTATCTTCCT | CCAGCTCCCC | TCCTACCTCC | AAAGAAGAAG |           |           |
| <b>Ppr_3</b> | TCCAGAAGTC | CCGCTCTTTC | TATCCACTCS | TTATCTTCCT | CCAGCTCCCC | TCCTACCTCC | AAAGAAGAAG |           |           |
| <b>Ppr_4</b> | TCCAGAAGTC | CCGCTCTTTC | TATCCACTCS | TTATCTTCCT | CCAGCTCCCC | TCCTACCTCC | AAAGAAGAAG |           |           |
| <b>Ppr_5</b> | TCCAGAAGTC | CCGCTCTTTC | TATCCACTCS | TTATCTTCCT | CCAGCTCCCC | TCCTACCTCC | AAAGAAGAAG |           |           |

|              |            |            |            |            |             |            |            |           |           |
|--------------|------------|------------|------------|------------|-------------|------------|------------|-----------|-----------|
|              | .... ....  | .... ....  | .... ....  | .... ....  | .... ....   | .... ....  | .... ....  | .... .... | .... .... |
|              | 80         | 90         | 100        | 110        | 120         | 130        | 140        |           |           |
| <b>Peu_1</b> | CCATTGTTCA | AGCCAAAACC | TGTCTCTCAA | CCACCCTAGA | GAAGCCCCCTA | AACAACCCAA | AACTAGCTGG |           |           |
| <b>Peu_2</b> | CCATTGTTCA | AGCCAAAACC | TGTCTCTCAA | CCACCCTAGA | GAAGCCCCCTA | AACAACCCAA | AACTAGCTGG |           |           |
| <b>Peu_3</b> | CCATTGTTCA | AGCCAAAACC | TGTCTCTCAA | CCACCCTAGA | GAAGCCCCCTA | AACAACCCAA | AACTAGCTGG |           |           |
| <b>Peu_4</b> | CCATTGTTCA | AGCCAAAACC | TGTCTCTCAA | CCACCCTAGA | GAAGCCCCCTA | AACAACCCAA | AACTAGCTGG |           |           |
| <b>Peu_5</b> | CCATTGTTCA | AGCCAAAACC | TGTCTCTCAA | CCACCCTAGA | GAAGCCCCCTA | AACAACCCAA | AACTAGCTGG |           |           |
| <b>Ppr_1</b> | CCATTGTTCA | AGCCAAAACC | TGTCTCTCAA | CCACCCTAGA | GAAGCCCCCTA | AACAACCCAA | AACTAGCTGG |           |           |
| <b>Ppr_2</b> | CCATTGTTCA | AGCCAAAACC | TGTCTCTCAA | CCACCCTAGA | GAAGCCCCCTA | AACAACCCAA | AACTAGCTGG |           |           |
| <b>Ppr_3</b> | CCATTGTTCA | AGCCAAAACC | TGTCTCTCAA | CCACCCTAGA | GAAGCCCCCTA | AACAACCCAA | AACTAGCTGG |           |           |
| <b>Ppr_4</b> | CCATTGTTCA | AGCCAAAACC | TGTCTCTCAA | CCACCCTAGA | GAAGCCCCCTA | AACAACCCAA | AACTAGCTGG |           |           |
| <b>Ppr_5</b> | CCATTGTTCA | AGCCAAAACC | TGTCTCTCAA | CCACCCTAGA | GAAGCCCCCTA | AACAACCCAA | AACTAGCTGG |           |           |

|              |            |            |            |            |            |            |            |           |           |
|--------------|------------|------------|------------|------------|------------|------------|------------|-----------|-----------|
|              | .... ....  | .... ....  | .... ....  | .... ....  | .... ....  | .... ....  | .... ....  | .... .... | .... .... |
|              | 150        | 160        | 170        | 180        | 190        | 200        | 210        |           |           |
| <b>Peu_1</b> | CAAACCTAAG | AAACTGAAGC | AACCTAGATT | CCAGGTAGAA | ATCCCAGTCA | TAGATGACTC | GCCAACTTCT |           |           |
| <b>Peu_2</b> | CAAACCTAAG | AAACTGAAGC | AACCTAGATT | CCAGGTAGAA | ATCCCAGTCA | TAGATGACTC | GCCAACTTCT |           |           |
| <b>Peu_3</b> | CAAACCTAAG | AAACTGAAGC | AACCTAGATT | CCAGGTAGAA | ATCCCAGTCA | TAGATGACTC | GCCAACTTCT |           |           |
| <b>Peu_4</b> | CAAACCTAAG | AAACTGAAGC | AACCTAGATT | CCAGGTAGAA | ATCCCAGTCA | TAGATGACTC | GCCAACTTCT |           |           |
| <b>Peu_5</b> | CAAACCTAAG | AAACTGAAGC | AACCTAGATT | CCAGGTAGAA | ATCCCAGTCA | TAGATGACTC | GCCAACTTCT |           |           |
| <b>Ppr_1</b> | CAAACCTAAG | AAACTGAAGC | AACCTAGATT | CCAGGTAGAA | ATCCCAGTCA | TRGATGACTC | GCCAACTTCT |           |           |
| <b>Ppr_2</b> | CAAACCTAAG | AAACTGAAGC | AACCTAGATT | CCAGGTAGAA | ATCCCAGTCA | TRGATGACTC | GCCAACTTCT |           |           |
| <b>Ppr_3</b> | CAAACCTAAG | AAACTGAAGC | AACCTAGATT | CCAGGTAGAA | ATCCCAGTCA | TRGATGACTC | GCCAACTTCT |           |           |
| <b>Ppr_4</b> | CAAACCTAAG | AAACTGAAGC | AACCTAGATT | CCAGGTAGAA | ATCCCAGTCA | TRGATGACTC | GCCAACTTCT |           |           |
| <b>Ppr_5</b> | CAAACCTAAG | AAACTGAAGC | AACCTAGATT | CCAGGTAGAA | ATCCCAGTCA | TRGATGACTC | GCCAACTTCT |           |           |

|              |            |            |            |            |            |            |            |           |           |
|--------------|------------|------------|------------|------------|------------|------------|------------|-----------|-----------|
|              | .... ....  | .... ....  | .... ....  | .... ....  | .... ....  | .... ....  | .... ....  | .... .... | .... .... |
|              | 220        | 230        | 240        | 250        | 260        | 270        | 280        |           |           |
| <b>Peu_1</b> | CTCTCTCAAC | TTGCCTCTGA | TGTTTTCAAA | GACCTGCCCA | TTAAGAGAAG | AGGGACACCG | GTCAAGATTT |           |           |
| <b>Peu_2</b> | CTCTCTCAAC | TTGCCTCTGA | TGTTTTCAAA | GACCTGCCCA | TTAAGAGAAG | AGGGACACCG | GTCAAGATTT |           |           |
| <b>Peu_3</b> | CTCTCTCAAC | TTGCCTCTGA | TGTTTTCAAA | GACCTGCCCA | TTAAGAGAAG | AGGGACACCG | GTCAAGATTT |           |           |
| <b>Peu_4</b> | CTCTCTCAAC | TTGCCTCTGA | TGTTTTCAAA | GACCTGCCCA | TTAAGAGAAG | AGGGACACCG | GTCAAGATTT |           |           |
| <b>Peu_5</b> | CTCTCTCAAC | TTGCCTCTGA | TGTTTTCAAA | GACCTGCCCA | TTAAGAGAAG | AGGGACACCG | GTCAAGATTT |           |           |
| <b>Ppr_1</b> | CTCTCTCAAC | TTGCCTCTGA | TGTTTTCAAA | GACCTGCCCA | TTAAGAGAAG | AGGGACACCG | GTCAAGATTT |           |           |
| <b>Ppr_2</b> | CTCTCTCAAC | TTGCCTCTGA | TGTTTTCAAA | GACCTGCCCA | TTAAGAGAAG | AGGGACACCG | GTCAAGATTT |           |           |
| <b>Ppr_3</b> | CTCTCTCAAC | TTGCCTCTGA | TGTTTTCAAA | GACCTGCCCA | TTAAGAGAAG | AGGGACACCG | GTCAAGATTT |           |           |
| <b>Ppr_4</b> | CTCTCTCAAC | TTGCCTCTGA | TGTTTTCAAA | GACCTGCCCA | TTAAGAGAAG | AGGGACACCG | GTCAAGATTT |           |           |
| <b>Ppr_5</b> | CTCTCTCAAC | TTGCCTCTGA | TGTTTTCAAA | GACCTGCCCA | TTAAGAGAAG | AGGGACACCG | GTCAAGATTT |           |           |

|              |            |            |            |            |            |            |            |           |           |
|--------------|------------|------------|------------|------------|------------|------------|------------|-----------|-----------|
|              | .... ....  | .... ....  | .... ....  | .... ....  | .... ....  | .... ....  | .... ....  | .... .... | .... .... |
|              | 290        | 300        | 310        | 320        | 330        | 340        | 350        |           |           |
| <b>Peu_1</b> | TAATCCTCTG | GCCGAGTCCC | ACATTGAAGA | ACAGAGGCAT | AGAAGCATTT | CAATCTTACA | ATTCATCAAA |           |           |
| <b>Peu_2</b> | TAATCCTCTG | GCCGAGTCCC | ACATTGAAGA | ACAGAGGCAT | AGAAGCATTT | CAATCTTACA | ATTCATCAAA |           |           |
| <b>Peu_3</b> | TAATCCTCTG | GCCGAGTCCC | ACATTGAAGA | ACAGAGGCAT | AGAAGCATTT | CAATCTTACA | ATTCATCAAA |           |           |
| <b>Peu_4</b> | TAATCCTCTG | GCCGAGTCCC | ACATTGAAGA | ACAGAGGCAT | AGAAGCATTT | CAATCTTACA | ATTCATCAAA |           |           |
| <b>Peu_5</b> | TAATCCTCTG | GCCGAGTCCC | ACATTGAAGA | ACAGAGGCAT | AGAAGCATTT | CAATCTTACA | ATTCATCAAA |           |           |
| <b>Ppr_1</b> | TAATCCTCTG | GCCGAGTCCC | ACATTGAAGA | ACAGAGGCAT | AGAAGCATTT | CAATCTTACA | ATTCATCAAA |           |           |
| <b>Ppr_2</b> | TAATCCTCTG | GCCGAGTCCC | ACATTGAAGA | ACAGAGGCAT | AGAAGCATTT | CAATCTTACA | ATTCATCAAA |           |           |
| <b>Ppr_3</b> | TAATCCTCTG | GCCGAGTCCC | ACATTGAAGA | ACAGAGGCAT | AGAAGCATTT | CAATCTTACA | ATTCATCAAA |           |           |
| <b>Ppr_4</b> | TAATCCTCTG | GCCGAGTCCC | ACATTGAAGA | ACAGAGGCAT | AGAAGCATTT | CAATCTTACA | ATTCATCAAA |           |           |
| <b>Ppr_5</b> | TAATCCTCTG | GCCGAGTCCC | ACATTGAAGA | ACAGAGGCAT | AGAAGCATTT | CAATCTTACA | ATTCATCAAA |           |           |

|  |           |           |           |           |           |           |           |           |           |
|--|-----------|-----------|-----------|-----------|-----------|-----------|-----------|-----------|-----------|
|  | .... .... | .... .... | .... .... | .... .... | .... .... | .... .... | .... .... | .... .... | .... .... |
|  | 360       | 370       | 380       | 390       | 400       | 410       | 420       |           |           |

|       |            |            |            |            |            |            |            |
|-------|------------|------------|------------|------------|------------|------------|------------|
| Peu_1 | AAATGTTGAG | CACGTCGACG | TTTCTTCAGT | CAGAAATACA | GACAACAGAA | TTTTGAGTTC | TGCCGAAGTG |
| Peu_2 | AAATGTTGAG | CACGTCGACG | TTTCTTCAGT | CAGAAATACA | GACAACAGAA | TTTTGAGTTC | TGCCGAAGTG |
| Peu_3 | AAATGTTGAG | CACGTCGACG | TTTCTTCAGT | CAGAAATACA | GACAACAGAA | TTTTGAGTTC | TGCCGAAGTG |
| Peu_4 | AAATGTTGAG | CACGTCGACG | TTTCTTCAGT | CAGAAATACA | GACAACAGAA | TTTTGAGTTC | TGCCGAAGTG |
| Peu_5 | AAATGTTGAG | CACGTCGACG | TTTCTTCAGT | CAGAAATACA | GACAACAGAA | TTTTGAGTTC | TGCCGAAGTG |
| Ppr_1 | AAATGTTGAG | CACGTCGACG | TTTCTTCAGT | CAGAAATACA | GACAACAGAA | TTTTGAGTTC | TGCCGAAGTG |
| Ppr_2 | AAATGTTGAG | CACGTCGACG | TTTCTTCAGT | CAGAAATACA | GACAACAGAA | TTTTGAGTTC | TGCCGAAGTG |
| Ppr_3 | AAATGTTGAG | CACGTCGACG | TTTCTTCAGT | CAGAAATACA | GACAACAGAA | TTTTGAGTTC | TGCCGAAGTG |
| Ppr_4 | AAATGTTGAG | CACGTCGACG | TTTCTTCAGT | CAGAAATACA | GACAACAGAA | TTTTGAGTTC | TGCCGAAGTG |
| Ppr_5 | AAATGTTGAG | CACGTCGACG | TTTCTTCAGT | CAGAAATACA | GACAACAGAA | TTTTGAGTTC | TGCCGAAGTG |

.....|.....| .....|.....| .....|.....| .....|.....| .....|.....| .....|.....| .....|.....|

430 440 450 460 470 480 490

|       |             |            |            |            |             |            |            |
|-------|-------------|------------|------------|------------|-------------|------------|------------|
| Peu_1 | GCAGTGT TTC | TGGGGCCAGA | GACTTCACAG | TTGCCTGATA | TCAAAA CTGT | TACTGATATT | CTGTACCCAA |
| Peu_2 | GCAGTGT TTC | TGGGGCCAGA | GACTTCACAG | TTGCCTGATA | TCAAAA CTGT | TACTGATATT | CTGTACCCAA |
| Peu_3 | GCAGTGT TTC | TGGGGCCAGA | GACTTCACAG | TTGCCTGATA | TCAAAA CTGT | TACTGATATT | CTGTACCCAA |
| Peu_4 | GCAGTGT TTC | TGGGGCCAGA | GACTTCACAG | TTGCCTGATA | TCAAAA CTGT | TACTGATATT | CTGTACCCAA |
| Peu_5 | GCAGTGT TTC | TGGGGCCAGA | GACTTCACAG | TTGCCTGATA | TCAAAA CTGT | TACTGATATT | CTGTACCCAA |
| Ppr_1 | GCAGTGT TTC | TGGGGCCAGA | GACTTCACAG | TTGCCTGATA | TCAAAA CTGT | TACTGATATT | TTGTACCCAA |
| Ppr_2 | GCAGTGT TTC | TGGGGCCAGA | GACTTCACAG | TTGCCTGATA | TCAAAA CTGT | TACTGATATT | TTGTACCCAA |
| Ppr_3 | GCAGTGT TTC | TGGGGCCAGA | GACTTCACAG | TTGCCTGATA | TCAAAA CTGT | TACTGATATT | TTGTACCCAA |
| Ppr_4 | GCAGTGT TTC | TGGGGCCAGA | GACTTCACAG | TTGCCTGATA | TCAAAA CTGT | TACTGATATT | TTGTACCCAA |
| Ppr_5 | GCAGTGT TTC | TGGGGCCAGA | GACTTCACAG | TTGCCTGATA | TCAAAA CTGT | TACTGATATT | TTGTACCCAA |

.....|.....| .....|.....| .....|.....| .....|.....| .....|.....| .....|.....| .....|.....|

500 510 520 530 540 550 560

|       |            |            |            |            |            |            |              |
|-------|------------|------------|------------|------------|------------|------------|--------------|
| Peu_1 | AGCCAGTAGT | CATATTCAAC | CCCAAATGGG | GGTTTGGAGA | GGAGAACGAG | TTTGGTGATT | TGAGTGGC TTT |
| Peu_2 | AGCCAGTAGT | CATATTCAAC | CCCAAATGGG | GGTTTGGAGA | GGAGAACGAG | TTTGGTGATT | TGAGTGGC TTT |
| Peu_3 | AGCCAGTAGT | CATATTCAAC | CCCAAATGGG | GGTTTGGAGA | GGAGAACGAG | TTTGGTGATT | TGAGTGGC TTT |
| Peu_4 | AGCCAGTAGT | CATATTCAAC | CCCAAATGGG | GGTTTGGAGA | GGAGAACGAG | TTTGGTGATT | TGAGTGGC TTT |
| Peu_5 | AGCCAGTAGT | CATATTCAAC | CCCAAATGGG | GGTTTGGAGA | GGAGAACGAG | TTTGGTGATT | TGAGTGGC TTT |
| Ppr_1 | AGCCAGTAGT | CATATTCAAC | CCCAAATGGG | GGTTTGGAGA | GGAGAACGAG | TTTGGTGATT | TGAGTGGY TTT |
| Ppr_2 | AGCCAGTAGT | CATATTCAAC | CCCAAATGGG | GGTTTGGAGA | GGAGAACGAG | TTTGGTGATT | TGAGTGGY TTT |
| Ppr_3 | AGCCAGTAGT | CATATTCAAC | CCCAAATGGG | GGTTTGGAGA | GGAGAACGAG | TTTGGTGATT | TGAGTGGY TTT |
| Ppr_4 | AGCCAGTAGT | CATATTCAAC | CCCAAATGGG | GGTTTGGAGA | GGAGAACGAG | TTTGGTGATT | TGAGTGGY TTT |
| Ppr_5 | AGCCAGTAGT | CATATTCAAC | CCCAAATGGG | GGTTTGGAGA | GGAGAACGAG | TTTGGTGATT | TGAGTGGY TTT |

.....|.....| .....|.....| .....|.....| .....|.....| .....|.....| .....|.....| .....|.....|

570 580 590 600 610 620 630

|       |            |            |            |            |            |             |            |
|-------|------------|------------|------------|------------|------------|-------------|------------|
| Peu_1 | TGTGGGATCC | TTTGAAGTGG | TATATTCATT | CATGGGGTTG | GAGGTTAGAG | GTATTTT GAG | CAAGCGAAAA |
| Peu_2 | TGTGGGATCC | TTTGAAGTGG | TATATTCATT | CATGGGGTTG | GAGGTTAGAG | GTATTTT GAG | CAAGCGAAAA |
| Peu_3 | TGTGGGATCC | TTTGAAGTGG | TATATTCATT | CATGGGGTTG | GAGGTTAGAG | GTATTTT GAG | CAAGCGAAAA |
| Peu_4 | TGTGGGATCC | TTTGAAGTGG | TATATTCATT | CATGGGGTTG | GAGGTTAGAG | GTATTTT GAG | CAAGCGAAAA |
| Peu_5 | TGTGGGATCC | TTTGAAGTGG | TATATTCATT | CATGGGGTTG | GAGGTTAGAG | GTATTTT GAG | CAAGCGAAAA |
| Ppr_1 | TGTGGGATCC | TTTGAAGTGG | TATATTCATT | CATGGGGTTG | GAGGTTAGAG | GTATTTT GAG | CAAGCGAAAA |
| Ppr_2 | TGTGGGATCC | TTTGAAGTGG | TATATTCATT | CATGGGGTTG | GAGGTTAGAG | GTATTTT GAG | CAAGCGAAAA |
| Ppr_3 | TGTGGGATCC | TTTGAAGTGG | TATATTCATT | CATGGGGTTG | GAGGTTAGAG | GTATTTT GAG | CAAGCGAAAA |
| Ppr_4 | TGTGGGATCC | TTTGAAGTGG | TATATTCATT | CATGGGGTTG | GAGGTTAGAG | GTATTTT GAG | CAAGCGAAAA |
| Ppr_5 | TGTGGGATCC | TTTGAAGTGG | TATATTCATT | CATGGGGTTG | GAGGTTAGAG | GTATTTT GAG | CAAGCGAAAA |

.....|.....| .....|.....| .....|.....| .....|.....| .....|.....| .....|.....| .....|.....|

640 650 660 670 680 690 700

|       |              |            |            |            |            |            |            |
|-------|--------------|------------|------------|------------|------------|------------|------------|
| Peu_1 | GGAGTG AITTT | TCAAGTGTGT | CAGAGATGGG | GTTGTGAGTG | GAGAGAAATG | GACTGTTCTT | GTTGAAGAAG |
| Peu_2 | GGAGTG AITTT | TCAAGTGTGT | CAGAGATGGG | GTTGTGAGTG | GAGAGAAATG | GACTGTTCTT | GTTGAAGAAG |
| Peu_3 | GGAGTG AITTT | TCAAGTGTGT | CAGAGATGGG | GTTGTGAGTG | GAGAGAAATG | GACTGTTCTT | GTTGAAGAAG |
| Peu_4 | GGAGTG AITTT | TCAAGTGTGT | CAGAGATGGG | GTTGTGAGTG | GAGAGAAATG | GACTGTTCTT | GTTGAAGAAG |
| Peu_5 | GGAGTG AITTT | TCAAGTGTGT | CAGAGATGGG | GTTGTGAGTG | GAGAGAAATG | GACTGTTCTT | GTTGAAGAAG |
| Ppr_1 | GGAGTG GITTT | TCAAGTGTGT | CAGAGATGGG | GTTGYGAGTG | GAGAGAAATG | GACTGTTCTT | GTTGAAGAAG |
| Ppr_2 | GGAGTG GITTT | TCAAGTGTGT | CAGAGATGGG | GTTGYGAGTG | GAGAGAAATG | GACTGTTCTT | GTTGAAGAAG |
| Ppr_3 | GGAGTG GITTT | TCAAGTGTGT | CAGAGATGGG | GTTGYGAGTG | GAGAGAAATG | GACTGTTCTT | GTTGAAGAAG |
| Ppr_4 | GGAGTG GITTT | TCAAGTGTGT | CAGAGATGGG | GTTGYGAGTG | GAGAGAAATG | GACTGTTCTT | GTTGAAGAAG |
| Ppr_5 | GGAGTG GITTT | TCAAGTGTGT | CAGAGATGGG | GTTGYGAGTG | GAGAGAAATG | GACTGTTCTT | GTTGAAGAAG |

.....|.....| .....|.....| .....|.....| .....|.....| .....|.....| .....|.....| .....|.....|

710 720 730 740 750 760 770

|       |            |            |            |            |            |            |            |
|-------|------------|------------|------------|------------|------------|------------|------------|
| Peu_1 | AAGGAGGAGA | ATTGAAGGTT | GTTTCAAGGT | TCAAGGCACG | ACCATCCATT | GGTGAAGTAG | AGAATGTTTT |
| Peu_2 | AAGGAGGAGA | ATTGAAGGTT | GTTTCAAGGT | TCAAGGCACG | ACCATCCATT | GGTGAAGTAG | AGAATGTTTT |
| Peu_3 | AAGGAGGAGA | ATTGAAGGTT | GTTTCAAGGT | TCAAGGCACG | ACCATCCATT | GGTGAAGTAG | AGAATGTTTT |
| Peu_4 | AAGGAGGAGA | ATTGAAGGTT | GTTTCAAGGT | TCAAGGCACG | ACCATCCATT | GGTGAAGTAG | AGAATGTTTT |



|              |            |            |            |            |            |            |            |
|--------------|------------|------------|------------|------------|------------|------------|------------|
| <b>Peu_5</b> | AAGGAGGAGA | ATTGAAGGTT | GTTTCAAGGT | TCAAGGCACG | ACCATCCATT | GGTGAAGTAG | AGAATGTTTT |
| <b>Ppr_1</b> | AAGGAGGACA | ATTGAAGGTT | GTTTCAAGGT | TCAAGGCACG | ACCATCCATT | GGTGAAGTAG | AGAATGTTTT |
| <b>Ppr_2</b> | AAGGAGGACA | ATTGAAGGTT | GTTTCAAGGT | TCAAGGCACG | ACCATCCATT | GGTGAAGTAG | AGAATGTTTT |
| <b>Ppr_3</b> | AAGGAGGACA | ATTGAAGGTT | GTTTCAAGGT | TCAAGGCACG | ACCATCCATT | GGTGAAGTAG | AGAATGTTTT |
| <b>Ppr_4</b> | AAGGAGGACA | ATTGAAGGTT | GTTTCAAGGT | TCAAGGCACG | ACCATCCATT | GGTGAAGTAG | AGAATGTTTT |
| <b>Ppr_5</b> | AAGGAGGACA | ATTGAAGGTT | GTTTCAAGGT | TCAAGGCACG | ACCATCCATT | GGTGAAGTAG | AGAATGTTTT |

.....|.....| .....|.....| .....|.....| .....|.....| .....|.....| .....|.....| .....|.....|  
                  780                  790                  800                  810                  820                  830                  840

|              |            |            |            |            |            |            |            |
|--------------|------------|------------|------------|------------|------------|------------|------------|
| <b>Peu_1</b> | GTACAATCTG | ATGGCTATCA | ATTCGCCAAT | TACCAAGTCT | GCTAGGTTTT | TCAAGGATTT | GGTGTCAAAT |
| <b>Peu_2</b> | GTACAATCTG | ATGGCTATCA | ATTCGCCAAT | TACCAAGTCT | GCTAGGTTTT | TCAAGGATTT | GGTGTCAAAT |
| <b>Peu_3</b> | GTACAATCTG | ATGGCTATCA | ATTCGCCAAT | TACCAAGTCT | GCTAGGTTTT | TCAAGGATTT | GGTGTCAAAT |
| <b>Peu_4</b> | GTACAATCTG | ATGGCTATCA | ATTCGCCAAT | TACCAAGTCT | GCTAGGTTTT | TCAAGGATTT | GGTGTCAAAT |
| <b>Peu_5</b> | GTACAATCTG | ATGGCTATCA | ATTCGCCAAT | TACCAAGTCT | GCTAGGTTTT | TCAAGGATTT | GGTGTCAAAT |
| <b>Ppr_1</b> | GTACAATCTG | ATGGCTATCA | ATTCGCCAAT | TACCAAGTCT | GCTAGGTTTT | TCAAGGATTT | GGTGTCAAAT |
| <b>Ppr_2</b> | GTACAATCTG | ATGGCTATCA | ATTCGCCAAT | TACCAAGTCT | GCTAGGTTTT | TCAAGGATTT | GGTGTCAAAT |
| <b>Ppr_3</b> | GTACAATCTG | ATGGCTATCA | ATTCGCCAAT | TACCAAGTCT | GCTAGGTTTT | TCAAGGATTT | GGTGTCAAAT |
| <b>Ppr_4</b> | GTACAATCTG | ATGGCTATCA | ATTCGCCAAT | TACCAAGTCT | GCTAGGTTTT | TCAAGGATTT | GGTGTCAAAT |
| <b>Ppr_5</b> | GTACAATCTG | ATGGCTATCA | ATTCGCCAAT | TACCAAGTCT | GCTAGGTTTT | TCAAGGATTT | GGTGTCAAAT |

...

|              |     |
|--------------|-----|
| <b>Peu_1</b> | GTA |
| <b>Peu_2</b> | GTA |
| <b>Peu_3</b> | GTA |
| <b>Peu_4</b> | GTA |
| <b>Peu_5</b> | GTA |
| <b>Ppr_1</b> | GTA |
| <b>Ppr_2</b> | GTA |
| <b>Ppr_3</b> | GTA |
| <b>Ppr_4</b> | GTA |
| <b>Ppr_5</b> | GTA |

Unigene39162\_All (proline-rich family protein)

```

.....|.....| .....|.....| .....|.....| .....|.....| .....|.....| .....|.....|
          10          20          30          40          50          60          70
Peu_1  AATTATSTAA TTTGTTTCAA ATTTTATAGGT GGATACGAGG AAAATGAAGA TGGATGTTAT TAGACCATGG
Peu_2  AATTATSTAA TTTGTTTCAA ATTTTATAGGT GGATACGAGG AAAATGAAGA TGGATGTTAT TAGACCATGG
Peu_3  AATTATSTAA TTTGTTTCAA ATTTTATAGGT GGATACGAGG AAAATGAAGA TGGATGTTAT TAGACCATGG
Peu_4  AATTATSTAA TTTGTTTCAA ATTTTATAGGT GGATACGAGG AAAATGAAGA TGGATGTTAT TAGACCATGG
Peu_5  AATTATSTAA TTTGTTTCAA ATTTTATAGGT GGATACGAGG AAAATGAAGA TGGATGTTAT TAGACCATGG
Ppr_1  AATTATCTAA TTTGTTTCAA ATTTTATAGGT GGATACGAGG AAAATGAAGA TGGATGTTAT TAGACCATGG
Ppr_2  AATTATCTAA TTTGTTTCAA ATTTTATAGGT GGATACGAGG AAAATGAAGA TGGATGTTAT TAGACCATGG
Ppr_3  AATTATCTAA TTTGTTTCAA ATTTTATAGGT GGATACGAGG AAAATGAAGA TGGATGTTAT TAGACCATGG
Ppr_4  AATTATCTAA TTTGTTTCAA ATTTTATAGGT GGATACGAGG AAAATGAAGA TGGATGTTAT TAGACCATGG
Ppr_5  AATTATCTAA TTTGTTTCAA ATTTTATAGGT GGATACGAGG AAAATGAAGA TGGATGTTAT TAGACCATGG

```

```

.....|.....| .....|.....| .....|.....| .....|.....| .....|.....| .....|.....|
          80          90          100          110          120          130          140
Peu_1  ATTGCTACTA GAGTGACGGA GCTTCTCGGA TTTGAAGATG AAGTTCCTTAT CAACTTCATT TATGGCCTGC
Peu_2  ATTGCTACTA GAGTGACGGA GCTTCTCGGA TTTGAAGATG AAGTTCCTTAT CAACTTCATT TATGGCCTGC
Peu_3  ATTGCTACTA GAGTGACGGA GCTTCTCGGA TTTGAAGATG AAGTTCCTTAT CAACTTCATT TATGGCCTGC
Peu_4  ATTGCTACTA GAGTGACGGA GCTTCTCGGA TTTGAAGATG AAGTTCCTTAT CAACTTCATT TATGGCCTGC
Peu_5  ATTGCTACTA GAGTGACGGA GCTTCTCGGA TTTGAAGATG AAGTTCCTTAT CAACTTCATT TATGGCCTGC
Ppr_1  ATTGCTACTA GAGTGACGGA GCTTCTCGGA TTTGAAGATG AAGTTCCTTAT CAACTTCATT TATGGCCTGC
Ppr_2  ATTGCTACTA GAGTGACGGA GCTTCTCGGA TTTGAAGATG AAGTTCCTTAT CAACTTCATT TATGGCCTGC
Ppr_3  ATTGCTACTA GAGTGACGGA GCTTCTCGGA TTTGAAGATG AAGTTCCTTAT CAACTTCATT TATGGCCTGC
Ppr_4  ATTGCTACTA GAGTGACGGA GCTTCTCGGA TTTGAAGATG AAGTTCCTTAT CAACTTCATT TATGGCCTGC
Ppr_5  ATTGCTACTA GAGTGACGGA GCTTCTCGGA TTTGAAGATG AAGTTCCTTAT CAACTTCATT TATGGCCTGC

```

```

.....|.....| .....|.....| .....|.....| .....|.....| .....|.....| .....|.....|
          150          160          170          180          190          200          210
Peu_1  TTGATGGAAA GGTCTTATTG ATTTTCTGCA ATTAACCTAA CTTTTTTTATG TGTCTGAAAA TAGTTCATGT
Peu_2  TTGATGGAAA GGTCTTATTG ATTTTCTGCA ATTAACCTAA CTTTTTTTATG TGTCTGAAAA TAGTTCATGT
Peu_3  TTGATGGAAA GGTCTTATTG ATTTTCTGCA ATTAACCTAA CTTTTTTTATG TGTCTGAAAA TAGTTCATGT
Peu_4  TTGATGGAAA GGTCTTATTG ATTTTCTGCA ATTAACCTAA CTTTTTTTATG TGTCTGAAAA TAGTTCATGT
Peu_5  TTGATGGAAA GGTCTTATTG ATTTTCTGCA ATTAACCTAA CTTTTTTTATG TGTCTGAAAA TAGTTCATGT
Ppr_1  TTGATGGAAA GGTCTTATTG ATTTTCTGCA ATTAACCTAA CTTTTTTTATG TGTCTGAAAA TAGTTCATGT
Ppr_2  TTGATGGAAA GGTCTTATTG ATTTTCTGCA ATTAACCTAA CTTTTTTTATG TGTCTGAAAA TAGTTCATGT
Ppr_3  TTGATGGAAA GGTCTTATTG ATTTTCTGCA ATTAACCTAA CTTTTTTTATG TGTCTGAAAA TAGTTCATGT
Ppr_4  TTGATGGAAA GGTCTTATTG ATTTTCTGCA ATTAACCTAA CTTTTTTTATG TGTCTGAAAA TAGTTCATGT
Ppr_5  TTGATGGAAA GGTCTTATTG ATTTTCTGCA ATTAACCTAA CTTTTTTTATG TGTCTGAAAA TAGTTCATGT

```

```

.....|.....| .....|.....| .....|.....| .....|.....| .....|.....| .....|.....|
          220          230          240          250          260          270          280
Peu_1  TTTGCTTTTC AATTGAATAC TGCACGCGTG GATCCTCTGT CTTTGCTAAT ATAATTTTAC AATACTTGCC
Peu_2  TTTGCTTTTC AATTGAATAC TGCACGCGTG GATCCTCTGT CTTTGCTAAT ATAATTTTAC AATACTTGCC
Peu_3  TTTGCTTTTC AATTGAATAC TGCACGCGTG GATCCTCTGT CTTTGCTAAT ATAATTTTAC AATACTTGCC
Peu_4  TTTGCTTTTC AATTGAATAC TGCACGCGTG GATCCTCTGT CTTTGCTAAT ATAATTTTAC AATACTTGCC
Peu_5  TTTGCTTTTC AATTGAATAC TGCACGCGTG GATCCTCTGT CTTTGCTAAT ATAATTTTAC AATACTTGCC
Ppr_1  TTTGCTTTTC AATTGAATAC TGCACGCGTG GATCCTCTGT CTTTGCTAAT ATAATTTTAC AATACTTGCC
Ppr_2  TTTGCTTTTC AATTGAATAC TGCACGCGTG GATCCTCTGT CTTTGCTAAT ATAATTTTAC AATACTTGCC
Ppr_3  TTTGCTTTTC AATTGAATAC TGCACGCGTG GATCCTCTGT CTTTGCTAAT ATAATTTTAC AATACTTGCC
Ppr_4  TTTGCTTTTC AATTGAATAC TGCACGCGTG GATCCTCTGT CTTTGCTAAT ATAATTTTAC AATACTTGCC
Ppr_5  TTTGCTTTTC AATTGAATAC TGCACGCGTG GATCCTCTGT CTTTGCTAAT ATAATTTTAC AATACTTGCC

```

```

.....|.....| .....|.....| .....|.....| .....|.....| .....|.....| .....|.....|
          290          300          310          320          330          340          350
Peu_1  TAAAGAATTG TTGAGAGTTC GTTTGGTGTT AGGCATTTTG TTTCTTAACA ATAGTCAAGT GGTTTGGTTA
Peu_2  TAAAGAATTG TTGAGAGTTC GTTTGGTGTT AGGCATTTTG TTTCTTAACA ATAGTCAAGT GGTTTGGTTA
Peu_3  TAAAGAATTG TTGAGAGTTC GTTTGGTGTT AGGCATTTTG TTTCTTAACA ATAGTCAAGT GGTTTGGTTA
Peu_4  TAAAGAATTG TTGAGAGTTC GTTTGGTGTT AGGCATTTTG TTTCTTAACA ATAGTCAAGT GGTTTGGTTA
Peu_5  TAAAGAATTG TTGAGAGTTC GTTTGGTGTT AGGCATTTTG TTTCTTAACA ATAGTCAAGT GGTTTGGTTA
Ppr_1  TAAAGAATTG TTGAGAGTTC GTTTGGTGTT AGGCATTTTG TTTCTTAACA ATAGTCAAGT GGTTTGGTTA
Ppr_2  TAAAGAATTG TTGAGAGTTC GTTTGGTGTT AGGCATTTTG TTTCTTAACA ATAGTCAAGT GGTTTGGTTA
Ppr_3  TAAAGAATTG TTGAGAGTTC GTTTGGTGTT AGGCATTTTG TTTCTTAACA ATAGTCAAGT GGTTTGGTTA
Ppr_4  TAAAGAATTG TTGAGAGTTC GTTTGGTGTT AGGCATTTTG TTTCTTAACA ATAGTCAAGT GGTTTGGTTA

```

|              |             |             |             |             |             |             |             |
|--------------|-------------|-------------|-------------|-------------|-------------|-------------|-------------|
| <b>Ppr_5</b> | TAAAGAATTG  | TTGAGAGTTC  | GTTTGGTGTT  | AGGCATTTTG  | TTTCTTAACA  | ATAGTCAAGT  | GGTTTGGTTA  |
|              | ..... ..... | ..... ..... | ..... ..... | ..... ..... | ..... ..... | ..... ..... | ..... ..... |
|              | 360         | 370         | 380         | 390         | 400         | 410         | 420         |
| <b>Peu_1</b> | TCAATTTTTT  | TTTGTGTAT   | ACTGTATTGA  | TGCAGGAAGT  | GAACGGGAAG  | GAGGTTCAAA  | TATCGCTTAC  |
| <b>Peu_2</b> | TCAATTTTTT  | TTTGTGTAT   | ACTGTATTGA  | TGCAGGAAGT  | GAACGGGAAG  | GAGGTTCAAA  | TATCGCTTAC  |
| <b>Peu_3</b> | TCAATTTTTT  | TTTGTGTAT   | ACTGTATTGA  | TGCAGGAAGT  | GAACGGGAAG  | GAGGTTCAAA  | TATCGCTTAC  |
| <b>Peu_4</b> | TCAATTTTTT  | TTTGTGTAT   | ACTGTATTGA  | TGCAGGAAGT  | GAACGGGAAG  | GAGGTTCAAA  | TATCGCTTAC  |
| <b>Peu_5</b> | TCAATTTTTT  | TTTGTGTAT   | ACTGTATTGA  | TGCAGGAAGT  | GAACGGGAAG  | GAGGTTCAAA  | TATCGCTTAC  |
| <b>Ppr_1</b> | TCAATTTTTT  | TTTGTGTAT   | ACTGTATTGA  | TGCAGGAAGT  | GAACGGGAAG  | GAGGTTCAAA  | TATCGCTTAC  |
| <b>Ppr_2</b> | TCAATTTTTT  | TTTGTGTAT   | ACTGTATTGA  | TGCAGGAAGT  | GAACGGGAAG  | GAGGTTCAAA  | TATCGCTTAC  |
| <b>Ppr_3</b> | TCAATTTTTT  | TTTGTGTAT   | ACTGTATTGA  | TGCAGGAAGT  | GAACGGGAAG  | GAGGTTCAAA  | TATCGCTTAC  |
| <b>Ppr_4</b> | TCAATTTTTT  | TTTGTGTAT   | ACTGTATTGA  | TGCAGGAAGT  | GAACGGGAAG  | GAGGTTCAAA  | TATCGCTTAC  |
| <b>Ppr_5</b> | TCAATTTTTT  | TTTGTGTAT   | ACTGTATTGA  | TGCAGGAAGT  | GAACGGGAAG  | GAGGTTCAAA  | TATCGCTTAC  |

|              |             |             |             |             |             |             |             |
|--------------|-------------|-------------|-------------|-------------|-------------|-------------|-------------|
|              | ..... ..... | ..... ..... | ..... ..... | ..... ..... | ..... ..... | ..... ..... | ..... ..... |
|              | 430         | 440         | 450         | 460         | 470         | 480         | 490         |
| <b>Peu_1</b> | GGGATTCATG  | GAGAAAAACA  | CTGGGAAGTT  | TATGAAAGAG  | CTTTGGACAC  | TTCTTCTTAG  | TGCGCAGAAG  |
| <b>Peu_2</b> | GGGATTCATG  | GAGAAAAACA  | CTGGGAAGTT  | TATGAAAGAG  | CTTTGGACAC  | TTCTTCTTAG  | TGCGCAGAAG  |
| <b>Peu_3</b> | GGGATTCATG  | GAGAAAAACA  | CTGGGAAGTT  | TATGAAAGAG  | CTTTGGACAC  | TTCTTCTTAG  | TGCGCAGAAG  |
| <b>Peu_4</b> | GGGATTCATG  | GAGAAAAACA  | CTGGGAAGTT  | TATGAAAGAG  | CTTTGGACAC  | TTCTTCTTAG  | TGCGCAGAAG  |
| <b>Peu_5</b> | GGGATTCATG  | GAGAAAAACA  | CTGGGAAGTT  | TATGAAAGAG  | CTTTGGACAC  | TTCTTCTTAG  | TGCGCAGAAG  |
| <b>Ppr_1</b> | GGGATTCATG  | GAGAAAAACA  | CTGGGAAGTT  | TATGAAAGAG  | CTTTGGACAC  | TTCTTCTTAG  | TGCGCAGAAA  |
| <b>Ppr_2</b> | GGGATTCATG  | GAGAAAAACA  | CTGGGAAGTT  | TATGAAAGAG  | CTTTGGACAC  | TTCTTCTTAG  | TGCGCAGAAA  |
| <b>Ppr_3</b> | GGGATTCATG  | GAGAAAAACA  | CTGGGAAGTT  | TATGAAAGAG  | CTTTGGACAC  | TTCTTCTTAG  | TGCGCAGAAA  |
| <b>Ppr_4</b> | GGGATTCATG  | GAGAAAAACA  | CTGGGAAGTT  | TATGAAAGAG  | CTTTGGACAC  | TTCTTCTTAG  | TGCGCAGAAA  |
| <b>Ppr_5</b> | GGGATTCATG  | GAGAAAAACA  | CTGGGAAGTT  | TATGAAAGAG  | CTTTGGACAC  | TTCTTCTTAG  | TGCGCAGAAA  |

|              |             |             |             |         |
|--------------|-------------|-------------|-------------|---------|
|              | ..... ..... | ..... ..... | ..... ..... | ..... . |
|              | 500         | 510         | 520         |         |
| <b>Peu_1</b> | AATGAAAGTG  | GTGTTCTCA   | ACAGTTTTTG  | GATGCC  |
| <b>Peu_2</b> | AATGAAAGTG  | GTGTTCTCA   | ACAGTTTTTG  | GATGCC  |
| <b>Peu_3</b> | AATGAAAGTG  | GTGTTCTCA   | ACAGTTTTTG  | GATGCC  |
| <b>Peu_4</b> | AATGAAAGTG  | GTGTTCTCA   | ACAGTTTTTG  | GATGCC  |
| <b>Peu_5</b> | AATGAAAGTG  | GTGTTCTCA   | ACAGTTTTTG  | GATGCC  |
| <b>Ppr_1</b> | AATGAAAGTG  | GTGTTCTCA   | ACAGTTTTTG  | GATGCC  |
| <b>Ppr_2</b> | AATGAAAGTG  | GTGTTCTCA   | ACAGTTTTTG  | GATGCC  |
| <b>Ppr_3</b> | AATGAAAGTG  | GTGTTCTCA   | ACAGTTTTTG  | GATGCC  |
| <b>Ppr_4</b> | AATGAAAGTG  | GTGTTCTCA   | ACAGTTTTTG  | GATGCC  |
| <b>Ppr_5</b> | AATGAAAGTG  | GTGTTCTCA   | ACAGTTTTTG  | GATGCC  |
