# Supplementary material for: Rapidly Evolving Genes and Stress Adaptation of Two Desert Poplars, Populus euphratica and P. pruinosa
Source: PLoS One. 2013 Jun 11;8(6):e66370. doi: 10.1371/journal.pone.0066370 (PMC3679102; doi:10.1371/journal.pone.0066370)
Supplement: Table S4 — KaKs Calculator was used to calculate Ka and Ks for the 2859 ortholog pairs. (XLSX) [file pone.0066370.s011.xlsx]

## Sheet: Sheet1
	Table S4 KaKs Calculator was used to calculate Ka and Ks for the 2859 ortholog pairs. KaKs Calculator provides comprehensive information estimated from compared sequences, including the name of the pairwise unigene in P. euphratica and P. pruinosa, numbers of synonymous and nonsynonymous sites, numbers of synonymous and nonsynonymous substitutions, GC contents, and the sequence length after remov…
	P. pruinosa	P. euphratica	Method	Ka	Ks	Ka/Ks	P-Value(Fisher)	Length	S-Sites	N-Sites	Fold-Sites(0:2:4)	Substitutions	S-Substitutions	N-Substitutions	Fold-S-Substitutions(0:2:4)	Fold-N-Substitutions(0:2:4)	Divergence-Time	Substitution-Rate-Ratio(rTC:rAG:rTA:rCG:rTG:rCA/rCA)	GC(1:2:3)	ML-Score	AICc	Akaike-Weight	Model
	Unigene20083_All	Unigene5981_All	YN	0.0188484	0.00261053	7.22015	0.0251638	1620	383.839	1236.16	NA	24	1	23	NA	NA	0.0150011	1.82406:1.82406:1:1:1:1	0.446353(0.517179:0.442134:0.379747)	NA	NA	NA	NA
	Unigene24348_All	Unigene23085_All	YN	0.019176	0.00390647	4.90877	0.110746	840	259.012	580.988	NA	12	1.00787	10.9921	NA	NA	0.0144677	6.0573:6.0573:1:1:1:1	0.429593(0.437294:0.387789:0.463696)	NA	NA	NA	NA
	Unigene24711_All	Unigene22585_All	YN	0.012043	0.00414771	2.90353	0.419257	912	241.764	670.236	NA	9	1	8	NA	NA	0.00995001	4.52045:4.52045:1:1:1:1	0.43224(0.445902:0.459016:0.391803)	NA	NA	NA	NA
	Unigene33005_All	Unigene33612_All	YN	0.0168897	0.00734966	2.29803	0.365573	993	273.457	719.543	NA	14	2	12	NA	NA	0.0142625	4.1212:4.1212:1:1:1:1	0.434097(0.432665:0.45702:0.412607)	NA	NA	NA	NA
	Unigene36802_All	Unigene26375_All	YN	0.00959443	0.00428631	2.23839	0.612493	864	234.078	629.922	NA	7	1	6	NA	NA	0.00815634	7.54646:7.54646:1:1:1:1	0.451389(0.498264:0.427083:0.428819)	NA	NA	NA	NA
	Unigene73763_All	Unigene25356_All	YN	0.00878601	0.00397953	2.2078	0.611282	939	251.953	687.047	NA	7	1	6	NA	NA	0.00749634	1.96802:1.96802:1:1:1:1	0.479766(0.538339:0.448882:0.452077)	NA	NA	NA	NA
	Unigene36786_All	Unigene15068_All	YN	0.00902183	0.00423823	2.12868	0.599653	795	236.615	558.385	NA	6	1	5	NA	NA	0.00759809	7.60428:7.60428:1:1:1:1	0.483083(0.50188:0.530075:0.417293)	NA	NA	NA	NA
	Unigene17406_All	Unigene36471_All	YN	0.0144041	0.00711993	2.02307	0.31194	702	141.119	560.881	NA	9	1	8	NA	NA	0.0129398	1.2061:1.2061:1:1:1:1	0.429568(0.487448:0.366109:0.435146)	NA	NA	NA	NA
	Unigene36460_All	Unigene23415_All	YN	0.0081136	0.00406841	1.99429	0.915359	990	246.463	743.537	NA	7	1	6	NA	NA	0.00710654	2.03448:2.03448:1:1:1:1	0.421596(0.404225:0.430986:0.429577)	NA	NA	NA	NA
	Unigene41800_All	Unigene22661_All	YN	0.0137084	0.00693851	1.9757	0.514601	1026	289.582	736.418	NA	12	2	10	NA	NA	0.0117977	3.36047:3.36047:1:1:1:1	0.415692(0.440058:0.369883:0.437135)	NA	NA	NA	NA
	Unigene33857_All	Unigene33039_All	YN	0.0111228	0.00577424	1.92628	0.910476	627	173.851	453.149	NA	6	1	5	NA	NA	0.00963979	3.00281:3.00281:1:1:1:1	0.426267(0.467742:0.389401:0.421659)	NA	NA	NA	NA
	Unigene3730_All	Unigene19287_All	YN	0.00715354	0.00378648	1.88923	0.906735	1248	264.765	983.235	NA	8	1	7	NA	NA	0.00643921	0.964055:0.964055:1:1:1:1	0.465743(0.494226:0.45843:0.444573)	NA	NA	NA	NA
	Unigene36272_All	Unigene32871_All	YN	0.00722011	0.00393241	1.83605	0.903251	951	255.057	695.943	NA	6	1	5	NA	NA	0.00633835	2:2:1:1:1:1	0.507886(0.555205:0.446372:0.522082)	NA	NA	NA	NA
	Unigene73520_All	Unigene25368_All	YN	0.0198945	0.0110403	1.80199	0.734624	846	182.491	663.509	NA	15	2	13	NA	NA	0.0179846	2:2:1:1:1:1	0.401754(0.515789:0.368421:0.321053)	NA	NA	NA	NA
	Unigene19474_All	Unigene31991_All	YN	0.00861949	0.0048798	1.76636	0.668021	1074	323.793	750.207	NA	8	1.57438	6.42562	NA	NA	0.00749204	7.56814:7.56814:1:1:1:1	0.432961(0.523743:0.354749:0.420391)	NA	NA	NA	NA
	Unigene16016_All	Unigene38095_All	YN	0.00746742	0.00430798	1.73339	0.894043	906	232.795	673.205	NA	6	1	5	NA	NA	0.00665561	2.75663:2.75663:1:1:1:1	0.463251(0.57764:0.414596:0.397516)	NA	NA	NA	NA
	Unigene5981_All	Unigene5781_All	YN	0.00936104	0.00558018	1.67755	0.887775	825	179.873	645.127	NA	7	1	6	NA	NA	0.00853671	1.88568:1.88568:1:1:1:1	0.424848(0.541818:0.370909:0.361818)	NA	NA	NA	NA
	Unigene63945_All	Unigene25345_All	YN	0.0136157	0.00821662	1.65709	0.706984	765	244.745	520.255	NA	9	2	7	NA	NA	0.0118884	11.708:11.708:1:1:1:1	0.47619(0.487179:0.415751:0.525641)	NA	NA	NA	NA
	Unigene27235_All	Unigene33864_All	YN	0.00733566	0.00444751	1.64939	0.886354	774	225.512	548.488	NA	5	1	4	NA	NA	0.00649417	5.74216:5.74216:1:1:1:1	0.442506(0.484496:0.387597:0.455426)	NA	NA	NA	NA
	Unigene25389_All	Unigene56801_All	YN	0.00603746	0.00370307	1.63039	0.884579	936	270.713	665.287	NA	5	1	4	NA	NA	0.0053623	4.09652:4.09652:1:1:1:1	0.42735(0.491987:0.358974:0.43109)	NA	NA	NA	NA
	Unigene26307_All	Unigene25692_All	YN	0.00715587	0.00440565	1.62425	0.883203	930	227.648	702.352	NA	6	1	5	NA	NA	0.00648267	3.92918:3.92918:1:1:1:1	0.443218(0.574132:0.462145:0.293375)	NA	NA	NA	NA
	Unigene39065_All	Unigene26093_All	YN	0.00818202	0.005051	1.61988	0.881697	936	198.648	737.352	NA	7	1	6	NA	NA	0.00751752	0.918605:0.918605:1:1:1:1	0.455128(0.522436:0.427885:0.415064)	NA	NA	NA	NA
	Unigene38828_All	Unigene25894_All	YN	0.00777695	0.00481796	1.61416	0.882098	855	208.224	646.776	NA	6	1	5	NA	NA	0.00705633	2:2:1:1:1:1	0.405848(0.484211:0.340351:0.392982)	NA	NA	NA	NA
	Unigene18644_All	Unigene40362_All	YN	0.0189222	0.0119118	1.58852	0.717702	705	169.237	535.763	NA	12	2	10	NA	NA	0.0172393	2.47968:2.47968:1:1:1:1	0.407801(0.489362:0.359574:0.374468)	NA	NA	NA	NA
	Unigene7956_All	Unigene25120_All	YN	0.0072407	0.00458599	1.57887	0.879382	774	218.723	555.277	NA	5	1	4	NA	NA	0.00649051	3.24104:3.24104:1:1:1:1	0.43565(0.596525:0.314672:0.395753)	NA	NA	NA	NA
	Unigene40390_All	Unigene3065_All	YN	0.0138544	0.00901353	1.53707	0.720147	957	237.537	719.463	NA	12	2.12737	9.87263	NA	NA	0.0126528	2.36708:2.36708:1:1:1:1	0.408568(0.526646:0.322884:0.376176)	NA	NA	NA	NA
	Unigene38374_All	Unigene24156_All	YN	0.00747943	0.0049426	1.51326	0.872166	741	202.99	538.01	NA	5	1	4	NA	NA	0.00678449	6.54829:6.54829:1:1:1:1	0.409582(0.455466:0.366397:0.406883)	NA	NA	NA	NA
	Unigene46024_All	Unigene7552_All	YN	0.0192872	0.0127528	1.51239	0.491553	1290	396.251	893.749	NA	22	5	17	NA	NA	0.0172801	8.76533:8.76533:1:1:1:1	0.431008(0.530233:0.348837:0.413953)	NA	NA	NA	NA
	Unigene9706_All	Unigene25175_All	YN	0.00792699	0.00525612	1.50814	0.714581	1524	381.843	1142.16	NA	11	2	9	NA	NA	0.0072578	3.23381:3.23381:1:1:1:1	0.437664(0.51378:0.413386:0.385827)	NA	NA	NA	NA
	Unigene39326_All	Unigene32074_All	YN	0.0118096	0.00807624	1.46226	0.973893	762	249.413	512.587	NA	8	2	6	NA	NA	0.0105876	8.21515:8.21515:1:1:1:1	0.466535(0.44685:0.431102:0.521654)	NA	NA	NA	NA
	Unigene22407_All	Unigene2542_All	YN	0.00404116	0.00283027	1.42784	0.861954	1347	353.99	993.01	NA	5	1	4	NA	NA	0.00372294	5.82502:5.82502:1:1:1:1	0.434007(0.542424:0.39899:0.360606)	NA	NA	NA	NA
	Unigene8998_All	Unigene4279_All	YN	0.0126085	0.00883988	1.42632	0.770677	1542	341.401	1200.6	NA	18	3	15	NA	NA	0.0117741	3.27668:3.27668:1:1:1:1	0.393694(0.488288:0.373874:0.318919)	NA	NA	NA	NA
	Unigene38242_All	Unigene16362_All	YN	0.0181689	0.0129989	1.39773	0.76286	852	248.145	603.855	NA	14	3.18622	10.8138	NA	NA	0.0166631	6.28832:6.28832:1:1:1:1	0.408304(0.49481:0.384083:0.346021)	NA	NA	NA	NA
	Unigene36416_All	Unigene15370_All	YN	0.0185724	0.0133766	1.38842	0.967181	696	150.852	545.148	NA	12	2	10	NA	NA	0.0174463	1.20577:1.20577:1:1:1:1	0.417385(0.497845:0.407328:0.346983)	NA	NA	NA	NA
	Unigene23735_All	Unigene5944_All	YN	0.0152041	0.0109658	1.3865	0.59982	1233	367.974	865.026	NA	17	4	13	NA	NA	0.0139392	8.14635:8.14635:1:1:1:1	0.477652(0.493182:0.448864:0.490909)	NA	NA	NA	NA
	Unigene106_All	Unigene31797_All	YN	0.00623028	0.00449587	1.38578	0.854641	1029	223.094	805.906	NA	6	1	5	NA	NA	0.00585425	1.3163:1.3163:1:1:1:1	0.432796(0.563172:0.428763:0.306452)	NA	NA	NA	NA
	Unigene38401_All	Unigene33343_All	YN	0.0108516	0.00791705	1.37067	0.850904	684	126.978	557.022	NA	7	1	6	NA	NA	0.0103068	0.867215:0.867215:1:1:1:1	0.405702(0.508772:0.320175:0.388158)	NA	NA	NA	NA
	Unigene23502_All	Unigene37978_All	YN	0.00516414	0.00380096	1.35864	0.853173	1041	263.759	777.241	NA	5	1	4	NA	NA	0.00481875	2:2:1:1:1:1	0.477906(0.5317:0.534582:0.367435)	NA	NA	NA	NA
	Unigene5743_All	Unigene23106_All	YN	0.00717246	0.00529425	1.35477	0.85275	750	189.552	560.448	NA	5	1	4	NA	NA	0.00669777	2.02153:2.02153:1:1:1:1	0.46732(0.533333:0.441176:0.427451)	NA	NA	NA	NA
	Unigene34511_All	Unigene8817_All	YN	0.00964701	0.0072351	1.33336	0.964699	1113	277.818	835.182	NA	10	2	8	NA	NA	0.00904497	2.92746:2.92746:1:1:1:1	0.432615(0.541779:0.407008:0.349057)	NA	NA	NA	NA
	Unigene34225_All	Unigene33388_All	YN	0.00786292	0.0059191	1.3284	0.849213	681	169.612	511.388	NA	5	1	4	NA	NA	0.00737879	2:2:1:1:1:1	0.426407(0.519481:0.37013:0.38961)	NA	NA	NA	NA
	Unigene2651_All	Unigene40029_All	YN	0.0231879	0.017627	1.31548	0.690401	1587	403.329	1183.67	NA	34	7	27	NA	NA	0.0217746	4.00228:4.00228:1:1:1:1	0.442195(0.513204:0.478873:0.334507)	NA	NA	NA	NA
	Unigene27603_All	Unigene19439_All	YN	0.0212162	0.0162118	1.30869	0.991478	714	187.335	526.665	NA	14	3	11	NA	NA	0.0199032	6.12608:6.12608:1:1:1:1	0.405256(0.473029:0.383817:0.358921)	NA	NA	NA	NA
	Unigene4162_All	Unigene20733_All	YN	0.00936842	0.00717356	1.30596	0.962832	1140	280.187	859.813	NA	10	2	8	NA	NA	0.00882897	3.03169:3.03169:1:1:1:1	0.454825(0.557895:0.418421:0.388158)	NA	NA	NA	NA
	Unigene7669_All	Unigene36802_All	YN	0.00331628	0.00255185	1.29956	0.844788	1602	392.637	1209.36	NA	5	1	4	NA	NA	0.00312892	2:2:1:1:1:1	0.443739(0.521779:0.471869:0.337568)	NA	NA	NA	NA
	Unigene23253_All	Unigene71435_All	YN	0.00845924	0.00651444	1.29854	0.962286	1260	308.419	951.581	NA	10	2	8	NA	NA	0.0079832	3.33715:3.33715:1:1:1:1	0.426304(0.473923:0.454649:0.35034)	NA	NA	NA	NA
	Unigene6755_All	Unigene65280_All	YN	0.0136861	0.0105432	1.2981	0.9634	708	191.033	516.967	NA	9	2	7	NA	NA	0.0128381	7.40446:7.40446:1:1:1:1	0.417339(0.491935:0.370968:0.389113)	NA	NA	NA	NA
	Unigene39295_All	Unigene8747_All	YN	0.00573535	0.00446604	1.28421	0.843372	750	224.669	525.331	NA	4	1	3	NA	NA	0.00535512	4.0397:4.0397:1:1:1:1	0.464(0.528:0.346:0.518)	NA	NA	NA	NA
	Unigene19366_All	Unigene37091_All	YN	0.0056859	0.00448297	1.26833	0.840381	930	223.734	706.266	NA	5	1	4	NA	NA	0.0053965	1.96045:1.96045:1:1:1:1	0.449575(0.457006:0.386943:0.504777)	NA	NA	NA	NA
	Unigene39293_All	Unigene27805_All	YN	0.00715712	0.00569328	1.25712	0.838933	738	176.417	561.583	NA	5	1	4	NA	NA	0.0068072	1.97731:1.97731:1:1:1:1	0.420724(0.52809:0.393258:0.340824)	NA	NA	NA	NA
	Unigene19516_All	Unigene33965_All	YN	0.00368624	0.00293691	1.25514	0.83532	1701	341.161	1359.84	NA	6	1	5	NA	NA	0.00353595	0.977905:0.977905:1:1:1:1	0.390359(0.475309:0.368607:0.32716)	NA	NA	NA	NA
	Unigene45594_All	Unigene21910_All	YN	0.0172296	0.0138291	1.24589	0.997544	1056	291.919	764.081	NA	17	4	13	NA	NA	0.0162896	3.97738:3.97738:1:1:1:1	0.438368(0.50651:0.460938:0.347656)	NA	NA	NA	NA
	Unigene5696_All	Unigene20444_All	YN	0.00771653	0.00621722	1.24116	0.833586	813	161.662	651.338	NA	6	1	5	NA	NA	0.0074184	1.29627:1.29627:1:1:1:1	0.407749(0.422509:0.453875:0.346863)	NA	NA	NA	NA
	Unigene1415_All	Unigene30158_All	YN	0.00807157	0.00661652	1.21991	0.955167	1425	303.609	1121.39	NA	11	2	9	NA	NA	0.00776156	2.42878:2.42878:1:1:1:1	0.409654(0.504892:0.409002:0.315068)	NA	NA	NA	NA
	Unigene31890_All	Unigene12590_All	YN	0.00456456	0.00374759	1.218	0.834183	927	267.506	659.494	NA	4	1	3	NA	NA	0.00432881	4.0796:4.0796:1:1:1:1	0.437972(0.480583:0.404531:0.428803)	NA	NA	NA	NA
	Unigene8771_All	Unigene27065_All	YN	0.00676789	0.00555703	1.2179	0.988711	2175	541.859	1633.14	NA	14	3	11	NA	NA	0.00646623	3.02048:3.02048:1:1:1:1	0.435966(0.514726:0.379518:0.413655)	NA	NA	NA	NA
	Unigene18369_All	Unigene33846_All	YN	0.00901373	0.00749931	1.20194	0.954764	1161	268.086	892.914	NA	10	2	8	NA	NA	0.00866403	1.70718:1.70718:1:1:1:1	0.417743(0.523256:0.373385:0.356589)	NA	NA	NA	NA
	Unigene37561_All	Unigene35153_All	YN	0.0046987	0.00396383	1.18539	0.827306	1107	252.948	854.052	NA	5	1	4	NA	NA	0.00453078	1.83596:1.83596:1:1:1:1	0.453478(0.54336:0.399729:0.417344)	NA	NA	NA	NA
	Unigene30965_All	Unigene13905_All	YN	0.0100116	0.008472	1.18173	0.958032	741	237.408	503.592	NA	7	2	5	NA	NA	0.00951834	7.88009:7.88009:1:1:1:1	0.46447(0.54845:0.403101:0.44186)	NA	NA	NA	NA
	Unigene38057_All	Unigene26832_All	YN	0.00984019	0.00836084	1.17694	0.952575	1059	240.606	818.394	NA	10	2	8	NA	NA	0.00950408	1.86919:1.86919:1:1:1:1	0.422775(0.485602:0.414921:0.367801)	NA	NA	NA	NA
	Unigene19344_All	Unigene10723_All	YN	0.0055881	0.00481575	1.16038	0.823291	927	208.425	718.575	NA	5	1	4	NA	NA	0.00541445	1.90928:1.90928:1:1:1:1	0.421791(0.469256:0.423948:0.372168)	NA	NA	NA	NA
	Unigene1685_All	Unigene25112_All	YN	0.00292536	0.00252116	1.16032	0.953913	2850	794.713	2055.29	NA	8	2	6	NA	NA	0.00281265	3.48334:3.48334:1:1:1:1	0.408772(0.520526:0.31:0.395789)	NA	NA	NA	NA
	Unigene39082_All	Unigene7277_All	YN	0.0153441	0.0133948	1.14552	0.999105	1299	376.623	922.377	NA	19	5	14	NA	NA	0.0147789	4.03017:4.03017:1:1:1:1	0.483449(0.506928:0.465358:0.47806)	NA	NA	NA	NA
	Unigene41388_All	Unigene2558_All	YN	0.0134548	0.0117894	1.14127	0.950896	696	171.034	524.966	NA	9	2	7	NA	NA	0.0130456	1.34841:1.34841:1:1:1:1	0.392667(0.502:0.364:0.312)	NA	NA	NA	NA
	Unigene2923_All	Unigene50822_All	YN	0.0140662	0.0123598	1.13807	0.996584	1119	326.841	792.159	NA	15	4	11	NA	NA	0.0135678	4.75093:4.75093:1:1:1:1	0.415103(0.50134:0.312332:0.431635)	NA	NA	NA	NA
	Unigene26469_All	Unigene33979_All	YN	0.00641301	0.00564974	1.1351	0.909441	1287	276.774	1010.23	NA	8	1.55768	6.44232	NA	NA	0.00624886	8.45975:8.45975:1:1:1:1	0.366521(0.429978:0.31291:0.356674)	NA	NA	NA	NA
	Unigene19334_All	Unigene5742_All	YN	0.0112745	0.0100035	1.12705	0.987167	1017	301.899	715.101	NA	11	3	8	NA	NA	0.0108972	2.70046:2.70046:1:1:1:1	0.474435(0.483776:0.370206:0.569322)	NA	NA	NA	NA
	Unigene2702_All	Unigene26692_All	YN	0.00927367	0.00829907	1.11744	0.985516	1449	363.756	1085.24	NA	13	3	10	NA	NA	0.00902901	3.53415:3.53415:1:1:1:1	0.413043(0.488613:0.383023:0.367495)	NA	NA	NA	NA
	Unigene42702_All	Unigene13995_All	YN	0.0101282	0.00918392	1.10282	0.951271	717	219.108	497.892	NA	7	2	5	NA	NA	0.00983962	6.96538:6.96538:1:1:1:1	0.421448(0.483607:0.336066:0.444672)	NA	NA	NA	NA
	Unigene39162_All	Unigene33683_All	YN	0.00601272	0.00548283	1.09665	0.81556	684	183.055	500.945	NA	4	1	3	NA	NA	0.00587091	2:2:1:1:1:1	0.464912(0.532895:0.486842:0.375)	NA	NA	NA	NA
	Unigene6695_All	Unigene23318_All	YN	0.00456675	0.00417224	1.09456	0.811498	1119	240.347	878.653	NA	5	1	4	NA	NA	0.00448202	2.00354:2.00354:1:1:1:1	0.427614(0.490617:0.487936:0.30429)	NA	NA	NA	NA
	Unigene18546_All	Unigene15902_All	YN	0.0129709	0.0119089	1.08918	0.636029	636	169.279	466.721	NA	8	2	6	NA	NA	0.0126882	2:2:1:1:1:1	0.477201(0.483491:0.476415:0.471698)	NA	NA	NA	NA
	Unigene11630_All	Unigene33854_All	YN	0.00421212	0.00393546	1.0703	0.810865	969	254.767	714.233	NA	4	1	3	NA	NA	0.00413938	2:2:1:1:1:1	0.463364(0.620743:0.411765:0.357585)	NA	NA	NA	NA
	Unigene36239_All	Unigene40255_All	YN	0.00971414	0.00921248	1.05445	0.941675	945	218.902	726.098	NA	9	2	7	NA	NA	0.00959794	9.56718:9.56718:1:1:1:1	0.469561(0.54491:0.513473:0.350299)	NA	NA	NA	NA
	Unigene25055_All	Unigene7260_All	YN	0.00793513	0.00756548	1.04886	0.943056	1026	265.694	760.306	NA	8	2	6	NA	NA	0.00783941	2.84275:2.84275:1:1:1:1	0.459552(0.47807:0.434211:0.466374)	NA	NA	NA	NA
	Unigene9139_All	Unigene25916_All	YN	0.0103477	0.00990878	1.0443	0.994844	1575	406.914	1168.09	NA	16	4	12	NA	NA	0.0102343	3.07376:3.07376:1:1:1:1	0.434194(0.48893:0.435424:0.378229)	NA	NA	NA	NA
	Unigene28932_All	Unigene35549_All	YN	0.00459872	0.00440845	1.04316	0.806183	882	227.63	654.37	NA	4	1	3	NA	NA	0.00454962	2.01129:2.01129:1:1:1:1	0.439909(0.442177:0.462585:0.414966)	NA	NA	NA	NA
	Unigene3450_All	Unigene19830_All	YN	0.0189527	0.0182158	1.04045	0.999889	1299	389.365	909.635	NA	24	7	17	NA	NA	0.0187318	3.8068:3.8068:1:1:1:1	0.473664(0.465011:0.486456:0.469526)	NA	NA	NA	NA
	Unigene39352_All	Unigene34836_All	YN	0.00676699	0.00650707	1.03994	0.805589	600	154.347	445.653	NA	4	1	3	NA	NA	0.00670013	2:2:1:1:1:1	0.461838(0.481308:0.509346:0.39486)	NA	NA	NA	NA
	Unigene4330_All	Unigene13227_All	YN	0.00536685	0.00518971	1.03413	0.800036	942	193.444	748.556	NA	5	1	4	NA	NA	0.00533048	2:2:1:1:1:1	0.422287(0.494135:0.365103:0.407625)	NA	NA	NA	NA
	Unigene29942_All	Unigene39287_All	YN	0.0202214	0.0196087	1.03125	0.994985	759	207.261	551.739	NA	15	4	11	NA	NA	0.0200541	2.23844:2.23844:1:1:1:1	0.463768(0.432806:0.452569:0.505929)	NA	NA	NA	NA
	Unigene22581_All	Unigene32893_All	YN	0.00661023	0.00644632	1.02543	0.803062	612	155.896	456.104	NA	4	1	3	NA	NA	0.00656848	2:2:1:1:1:1	0.455065(0.502451:0.5:0.362745)	NA	NA	NA	NA
	Unigene1222_All	Unigene1808_All	YN	0.00646672	0.00632596	1.02225	0.797841	780	158.746	621.254	NA	5	1	4	NA	NA	0.00643807	0.977912:0.977912:1:1:1:1	0.448077(0.538462:0.419231:0.386538)	NA	NA	NA	NA
	Unigene38312_All	Unigene58640_All	YN	0.0181441	0.0179174	1.01265	0.998327	1065	283.293	781.707	NA	19	5	14	NA	NA	0.0180838	4.27061:4.27061:1:1:1:1	0.420765(0.545082:0.375683:0.34153)	NA	NA	NA	NA
	Unigene19197_All	Unigene33699_All	YN	0.00296821	0.00297394	0.998074	0.79749	1350	337.023	1012.98	NA	4	1	3	NA	NA	0.00296964	2:2:1:1:1:1	0.429528(0.523256:0.40592:0.359408)	NA	NA	NA	NA
	Unigene18732_All	Unigene16189_All	YN	0.00454612	0.00455733	0.997541	0.797555	882	220.094	661.906	NA	4	1	3	NA	NA	0.00454891	2:2:1:1:1:1	0.473923(0.510204:0.430272:0.481293)	NA	NA	NA	NA
	Unigene35902_All	Unigene67439_All	YN	0.00554797	0.00556819	0.996369	0.797441	723	180.259	542.741	NA	4	1	3	NA	NA	0.00555301	2:2:1:1:1:1	0.440188(0.512097:0.368952:0.439516)	NA	NA	NA	NA
	Unigene68569_All	Unigene36485_All	YN	0.00575371	0.00585111	0.983354	0.78965	870	171.575	698.425	NA	5	1	4	NA	NA	0.00577292	2:2:1:1:1:1	0.397937(0.535831:0.348534:0.309446)	NA	NA	NA	NA
	Unigene27252_All	Unigene24169_All	YN	0.0180886	0.0184355	0.981179	0.999844	1284	385.894	898.106	NA	23	7	16	NA	NA	0.0181929	9.72974:9.72974:1:1:1:1	0.43512(0.544289:0.389277:0.371795)	NA	NA	NA	NA
	Unigene19398_All	Unigene37511_All	YN	0.00989158	0.0100951	0.979842	0.932295	912	199.583	712.417	NA	9	2	7	NA	NA	0.00993612	1.88389:1.88389:1:1:1:1	0.424044(0.457377:0.447541:0.367213)	NA	NA	NA	NA
	Unigene3354_All	Unigene40560_All	YN	0.0504002	0.0514702	0.97921	0.99998	777	181.032	595.968	NA	38	9	29	NA	NA	0.0506495	1.60016:1.60016:1:1:1:1	0.406667(0.494545:0.294545:0.430909)	NA	NA	NA	NA
	Unigene17433_All	Unigene26427_All	YN	0.00306058	0.00313476	0.976337	0.793304	1302	319.779	982.221	NA	4	1	3	NA	NA	0.0030788	1.90936:1.90936:1:1:1:1	0.459293(0.5:0.445853:0.432028)	NA	NA	NA	NA
	Unigene60660_All	Unigene17645_All	YN	0.00972049	0.00997984	0.974013	0.993819	1440	403.481	1036.52	NA	14	4	10	NA	NA	0.00979316	4.16907:4.16907:1:1:1:1	0.432986(0.536458:0.3625:0.4)	NA	NA	NA	NA
	Unigene37515_All	Unigene8592_All	YN	0.00365863	0.00376075	0.972845	0.79266	1089	266.727	822.273	NA	4	1	3	NA	NA	0.00368364	3.37772:3.37772:1:1:1:1	0.457543(0.476965:0.437669:0.457995)	NA	NA	NA	NA
	Unigene19521_All	Unigene18847_All	YN	0.00843301	0.00867496	0.97211	0.979618	1302	347.827	954.173	NA	11	3	8	NA	NA	0.00849764	2.68981:2.68981:1:1:1:1	0.447846(0.514739:0.450113:0.378685)	NA	NA	NA	NA
	Unigene6307_All	Unigene70443_All	YN	0.0115971	0.0119387	0.971387	0.734211	1122	283.922	838.078	NA	13	3.36259	9.63741	NA	NA	0.0116835	3.9427:3.9427:1:1:1:1	0.415596(0.520566:0.398458:0.327763)	NA	NA	NA	NA
	Unigene5962_All	Unigene26033_All	YN	0.00349959	0.00360948	0.969553	0.79193	1137	277.715	859.285	NA	4	1	3	NA	NA	0.00352643	1.84314:1.84314:1:1:1:1	0.475814(0.514512:0.48153:0.431398)	NA	NA	NA	NA
	Unigene37274_All	Unigene79405_All	YN	0.0108321	0.0111997	0.967172	0.979417	1014	269.932	744.068	NA	11	3	8	NA	NA	0.0109299	2.67102:2.67102:1:1:1:1	0.436047(0.502907:0.444767:0.360465)	NA	NA	NA	NA
	Unigene7680_All	Unigene20327_All	YN	0.00789385	0.00821791	0.960566	0.929249	1137	244.707	892.293	NA	9	2	7	NA	NA	0.00796359	8.75929:8.75929:1:1:1:1	0.397135(0.549479:0.308594:0.333333)	NA	NA	NA	NA
	Unigene4827_All	Unigene2046_All	YN	0.00538551	0.00561879	0.958482	0.928962	1662	357.514	1304.49	NA	9	2	7	NA	NA	0.00543569	0.77404:0.77404:1:1:1:1	0.478456(0.603232:0.482944:0.349192)	NA	NA	NA	NA
	Unigene29164_All	Unigene24424_All	YN	0.0115062	0.012013	0.957817	0.76209	1212	335.647	876.353	NA	14	4	10	NA	NA	0.0116466	3.80331:3.80331:1:1:1:1	0.443069(0.539604:0.375:0.414604)	NA	NA	NA	NA
	Unigene39807_All	Unigene33476_All	YN	0.00816584	0.0085422	0.955942	0.934916	852	235.531	616.469	NA	7	2	5	NA	NA	0.00826989	8.0902:8.0902:1:1:1:1	0.463615(0.596831:0.482394:0.31162)	NA	NA	NA	NA
	Unigene27933_All	Unigene175_All	YN	0.00619524	0.0065127	0.951256	0.930727	1281	308.494	972.506	NA	8	2	6	NA	NA	0.00627169	1.31678:1.31678:1:1:1:1	0.464871(0.466042:0.52459:0.403981)	NA	NA	NA	NA
	Unigene27429_All	Unigene46841_All	YN	0.00860204	0.0090594	0.949515	0.934174	807	222.101	584.899	NA	7	2	5	NA	NA	0.00872791	2.77907:2.77907:1:1:1:1	0.446296(0.557407:0.322222:0.459259)	NA	NA	NA	NA
	Unigene18156_All	Unigene33757_All	YN	0.00654369	0.00690324	0.947916	0.787895	606	145.527	460.473	NA	4	1	3	NA	NA	0.00663004	2.00691:2.00691:1:1:1:1	0.440594(0.470297:0.358911:0.492574)	NA	NA	NA	NA
	Unigene36449_All	Unigene30621_All	YN	0.0102238	0.0109036	0.937651	0.932558	678	184.762	493.238	NA	7	2	5	NA	NA	0.0104091	7.34761:7.34761:1:1:1:1	0.426254(0.502212:0.396018:0.380531)	NA	NA	NA	NA
	Unigene39870_All	Unigene10771_All	YN	0.00520296	0.00556375	0.935154	0.78509	759	180.403	578.597	NA	4	1	3	NA	NA	0.00528871	2:2:1:1:1:1	0.41859(0.523077:0.388462:0.344231)	NA	NA	NA	NA
	Unigene320_All	Unigene19452_All	YN	0.0106073	0.0113777	0.932283	0.92839	747	177.195	569.805	NA	8	2	6	NA	NA	0.01079	1.99119:1.99119:1:1:1:1	0.436412(0.504016:0.381526:0.423695)	NA	NA	NA	NA
	Unigene25500_All	Unigene2878_All	YN	0.0071997	0.00775079	0.928899	0.974459	1785	389.113	1395.89	NA	13	3	10	NA	NA	0.00731983	1.85683:1.85683:1:1:1:1	0.434454(0.497479:0.423529:0.382353)	NA	NA	NA	NA
	Unigene19073_All	Unigene5757_All	YN	0.0044731	0.00486252	0.919914	0.781772	879	206.322	672.678	NA	4	1	3	NA	NA	0.00456451	2:2:1:1:1:1	0.440273(0.508532:0.348123:0.464164)	NA	NA	NA	NA
	Unigene7383_All	Unigene37430_All	YN	0.0101666	0.011095	0.916328	0.974658	1164	272.398	891.602	NA	12	3	9	NA	NA	0.0103839	1.97866:1.97866:1:1:1:1	0.430281(0.558168:0.387376:0.345297)	NA	NA	NA	NA
	Unigene19201_All	Unigene26987_All	YN	0.00260299	0.00285273	0.912454	0.779888	1506	351.209	1154.79	NA	4	1	3	NA	NA	0.00266123	2:2:1:1:1:1	0.445991(0.545726:0.407555:0.384692)	NA	NA	NA	NA
	Unigene8143_All	Unigene26586_All	YN	0.00449622	0.00493232	0.911584	0.779981	873	203.497	669.503	NA	4	1	3	NA	NA	0.00459787	2:2:1:1:1:1	0.421535(0.446735:0.345361:0.472509)	NA	NA	NA	NA
	Unigene8662_All	Unigene16960_All	YN	0.00690316	0.00777612	0.887739	0.925107	987	258.533	728.467	NA	7	2	5	NA	NA	0.00713182	8.00517:8.00517:1:1:1:1	0.432828(0.533333:0.425758:0.339394)	NA	NA	NA	NA
	Unigene53255_All	Unigene7191_All	YN	0.0120108	0.0136988	0.876776	0.610326	651	147.393	503.607	NA	8	2	6	NA	NA	0.012393	1.43714:1.43714:1:1:1:1	0.432127(0.450226:0.443439:0.402715)	NA	NA	NA	NA
	Unigene3159_All	Unigene11683_All	YN	0.00450056	0.00513505	0.876439	0.772178	864	195.407	668.593	NA	4	1	3	NA	NA	0.00464406	1.96044:1.96044:1:1:1:1	0.448805(0.537543:0.43686:0.372014)	NA	NA	NA	NA
	Unigene4745_All	Unigene20395_All	YN	0.00195411	0.00223166	0.875632	0.771664	1986	448.765	1537.24	NA	4	1	3	NA	NA	0.00201683	1.95196:1.95196:1:1:1:1	0.424723(0.499245:0.364048:0.410876)	NA	NA	NA	NA
	Unigene1155_All	Unigene15355_All	YN	0.00313983	0.00359897	0.872425	0.771085	1236	278.524	957.476	NA	4	1	3	NA	NA	0.0032433	0.977903:0.977903:1:1:1:1	0.434466(0.493932:0.402913:0.406553)	NA	NA	NA	NA
	Unigene10017_All	Unigene65586_All	YN	0.0143205	0.0164294	0.87164	0.754284	882	246.143	635.857	NA	13	4	9	NA	NA	0.014909	9.98072:9.98072:1:1:1:1	0.425866(0.483766:0.446429:0.347403)	NA	NA	NA	NA
	Unigene1360_All	Unigene37899_All	YN	0.00934861	0.0107408	0.870384	0.922706	726	187.542	538.458	NA	7	2	5	NA	NA	0.00970824	2.97545:2.97545:1:1:1:1	0.444215(0.460744:0.487603:0.384298)	NA	NA	NA	NA
	Unigene37863_All	Unigene37328_All	YN	0.00420339	0.00485478	0.865826	0.763101	1161	206.65	954.35	NA	5	1	4	NA	NA	0.00431934	0.526912:0.526912:1:1:1:1	0.455756(0.572165:0.407216:0.387887)	NA	NA	NA	NA
	Unigene19152_All	Unigene16334_All	YN	0.00804194	0.00932421	0.862479	0.97531	1074	323.747	750.253	NA	9	3	6	NA	NA	0.00842847	5.82551:5.82551:1:1:1:1	0.439183(0.523677:0.359331:0.43454)	NA	NA	NA	NA
	Unigene25082_All	Unigene17678_All	YN	0.00802847	0.0093153	0.861858	0.762609	609	108.018	500.982	NA	5	1	4	NA	NA	0.00825671	0.926046:0.926046:1:1:1:1	0.395731(0.416256:0.396552:0.374384)	NA	NA	NA	NA
	Unigene9534_All	Unigene22280_All	YN	0.00245093	0.0028491	0.860247	0.768133	1578	351.656	1226.34	NA	4	1	3	NA	NA	0.00253966	2:2:1:1:1:1	0.429658(0.520913:0.389734:0.378327)	NA	NA	NA	NA
	Unigene3913_All	Unigene18574_All	YN	0.00299082	0.00348114	0.859149	0.768001	1293	287.929	1005.07	NA	4	1	3	NA	NA	0.00310001	2:2:1:1:1:1	0.41504(0.503254:0.380694:0.361171)	NA	NA	NA	NA
	Unigene44052_All	Unigene22937_All	YN	0.00812491	0.00947238	0.857747	0.925937	708	212.476	495.524	NA	6	2	4	NA	NA	0.00852929	5.86496:5.86496:1:1:1:1	0.440678(0.430085:0.502119:0.389831)	NA	NA	NA	NA
	Unigene1257_All	Unigene7601_All	YN	0.0198829	0.023238	0.855618	0.798542	978	263.403	714.597	NA	20	6	14	NA	NA	0.0207865	5.8304:5.8304:1:1:1:1	0.418699(0.460366:0.445122:0.35061)	NA	NA	NA	NA
	Unigene19170_All	Unigene26437_All	YN	0.0104789	0.0122598	0.854735	0.920337	645	164.471	480.529	NA	7	2	5	NA	NA	0.010933	1.91598:1.91598:1:1:1:1	0.461598(0.541475:0.4447:0.398618)	NA	NA	NA	NA
	Unigene4899_All	Unigene23834_All	YN	0.00523219	0.00612211	0.854639	0.919793	1287	328.02	958.98	NA	7	2	5	NA	NA	0.00545901	1.98469:1.98469:1:1:1:1	0.468143(0.544289:0.411422:0.448718)	NA	NA	NA	NA
	Unigene18989_All	Unigene56796_All	YN	0.0077177	0.00909939	0.848156	0.919025	873	221.37	651.63	NA	7	2	5	NA	NA	0.00806806	2:2:1:1:1:1	0.449026(0.472509:0.482818:0.391753)	NA	NA	NA	NA
	Unigene72392_All	Unigene26410_All	YN	0.00833234	0.00994158	0.838131	0.701507	1029	303.767	725.233	NA	9	3	6	NA	NA	0.0088074	9.94217:9.94217:1:1:1:1	0.406706(0.446064:0.405248:0.368805)	NA	NA	NA	NA
	Unigene26201_All	Unigene5322_All	YN	0.0125497	0.0150058	0.836327	0.700389	765	202.21	562.79	NA	10	3	7	NA	NA	0.0131989	3.55116:3.55116:1:1:1:1	0.437118(0.472527:0.432234:0.406593)	NA	NA	NA	NA
	Unigene26142_All	Unigene16745_All	YN	0.00769961	0.00921848	0.835237	0.922382	741	218.292	522.708	NA	6	2	4	NA	NA	0.00814705	5.93782:5.93782:1:1:1:1	0.395291(0.451673:0.347584:0.386617)	NA	NA	NA	NA
	Unigene1536_All	Unigene17340_All	YN	0.00221852	0.0026592	0.834281	0.761993	1731	376.719	1354.28	NA	4	1	3	NA	NA	0.00231443	1.90099:1.90099:1:1:1:1	0.397059(0.488754:0.356401:0.346021)	NA	NA	NA	NA
	Unigene42754_All	Unigene94159_All	YN	0.00887997	0.0106722	0.832065	0.922143	642	188.789	453.211	NA	6	2	4	NA	NA	0.00940701	3.58053:3.58053:1:1:1:1	0.482087(0.537383:0.432243:0.476636)	NA	NA	NA	NA
	Unigene5950_All	Unigene6243_All	YN	0.0126115	0.015347	0.821757	0.6379	1662	462.368	1199.63	NA	22	7	15	NA	NA	0.0133725	4.90729:4.90729:1:1:1:1	0.444344(0.517148:0.444043:0.371841)	NA	NA	NA	NA
	Unigene36493_All	Unigene22675_All	YN	0.00377317	0.00460402	0.819538	0.374799	1008	251.557	756.443	NA	4	1.15416	2.84584	NA	NA	0.00398052	2:2:1:1:1:1	0.4857(0.528107:0.477811:0.451183)	NA	NA	NA	NA
	Unigene9051_All	Unigene20094_All	YN	0.02682	0.0328088	0.817464	0.672051	1041	281.845	759.155	NA	29	9	20	NA	NA	0.0284414	2.58352:2.58352:1:1:1:1	0.447797(0.472701:0.45977:0.41092)	NA	NA	NA	NA
	Unigene9763_All	Unigene32756_All	YN	0.0120793	0.0147921	0.8166	0.775286	1344	342.232	1001.77	NA	17	5	12	NA	NA	0.0127701	2.80519:2.80519:1:1:1:1	0.411136(0.505531:0.355088:0.372788)	NA	NA	NA	NA
	Unigene46367_All	Unigene39910_All	YN	0.00852339	0.0104479	0.815802	0.596674	783	192.763	590.237	NA	7	2	5	NA	NA	0.00899716	3.02501:3.02501:1:1:1:1	0.414545(0.523636:0.392727:0.327273)	NA	NA	NA	NA
	Unigene9006_All	Unigene37862_All	YN	0.00411531	0.00507064	0.811594	0.918147	1371	395.824	975.176	NA	6	2	4	NA	NA	0.00439112	3.7876:3.7876:1:1:1:1	0.415755(0.468271:0.389497:0.389497)	NA	NA	NA	NA
	Unigene20193_All	Unigene18995_All	YN	0.0119209	0.0146915	0.81141	0.589298	645	137.528	507.472	NA	8	2	6	NA	NA	0.0125116	0.917603:0.917603:1:1:1:1	0.424376(0.45815:0.38326:0.431718)	NA	NA	NA	NA
	Unigene2767_All	Unigene67404_All	YN	0.014943	0.0185146	0.807091	0.743862	963	219.285	743.715	NA	15	4	11	NA	NA	0.0157563	1.52931:1.52931:1:1:1:1	0.453271(0.523364:0.404984:0.431464)	NA	NA	NA	NA
	Unigene8102_All	Unigene21772_All	YN	0.0109794	0.0136737	0.802956	0.690095	864	221.416	642.584	NA	10	3	7	NA	NA	0.0116699	2.42682:2.42682:1:1:1:1	0.452301(0.557239:0.417508:0.382155)	NA	NA	NA	NA
	Unigene15982_All	Unigene34519_All	YN	0.00427704	0.00533663	0.80145	0.7559	657	188.052	468.948	NA	3	1	2	NA	NA	0.00458032	2:2:1:1:1:1	0.464493(0.53913:0.482609:0.371739)	NA	NA	NA	NA
	Unigene39221_All	Unigene8693_All	YN	0.00817346	0.0102002	0.801302	0.740067	1380	394.821	985.179	NA	12	4	8	NA	NA	0.00875333	4.13303:4.13303:1:1:1:1	0.419255(0.453416:0.401656:0.402692)	NA	NA	NA	NA
	Unigene25976_All	Unigene6195_All	YN	0.00915298	0.0114439	0.79981	0.589246	726	176.102	549.898	NA	7	2	5	NA	NA	0.00970868	5.88744:5.88744:1:1:1:1	0.466408(0.550388:0.420543:0.428295)	NA	NA	NA	NA
	Unigene28338_All	Unigene24408_All	YN	0.00638137	0.00807865	0.789906	0.592679	879	248.969	630.031	NA	6	2	4	NA	NA	0.00686211	5.33767:5.33767:1:1:1:1	0.427759(0.484642:0.363481:0.435154)	NA	NA	NA	NA
	Unigene19778_All	Unigene25635_All	YN	0.0167817	0.0212601	0.789351	0.581214	1023	239.425	783.575	NA	18	5	13	NA	NA	0.0178298	2.25951:2.25951:1:1:1:1	0.438164(0.486957:0.427536:0.4)	NA	NA	NA	NA
	Unigene9826_All	Unigene4399_All	YN	0.00989897	0.0125504	0.788737	0.578169	771	160.694	610.306	NA	8	2	6	NA	NA	0.0104516	1.82709:1.82709:1:1:1:1	0.404332(0.467509:0.370036:0.375451)	NA	NA	NA	NA
	Unigene21957_All	Unigene27015_All	YN	0.00298535	0.0037867	0.788377	0.7506	1272	264.749	1007.25	NA	4	1	3	NA	NA	0.00315214	2:2:1:1:1:1	0.396619(0.505896:0.325472:0.358491)	NA	NA	NA	NA
	Unigene19424_All	Unigene33788_All	YN	0.005567	0.00708431	0.785821	0.590958	1005	283.724	721.276	NA	6	2	4	NA	NA	0.00599535	3.65911:3.65911:1:1:1:1	0.43675(0.412742:0.445983:0.451524)	NA	NA	NA	NA
	Unigene70834_All	Unigene71752_All	YN	0.0105856	0.0135086	0.78362	0.605022	1686	448.696	1237.3	NA	19	6	13	NA	NA	0.0113635	4.46246:4.46246:1:1:1:1	0.42497(0.52758:0.370996:0.376335)	NA	NA	NA	NA
	Unigene18380_All	Unigene33656_All	YN	0.00544429	0.00694774	0.783606	0.684368	1725	433.798	1291.2	NA	10	3	7	NA	NA	0.00582237	4.97786:4.97786:1:1:1:1	0.408986(0.474783:0.405217:0.346957)	NA	NA	NA	NA
	Unigene3263_All	Unigene22751_All	YN	0.00811519	0.0103656	0.782897	0.589679	690	194.283	495.717	NA	6	2	4	NA	NA	0.00874883	3.5444:3.5444:1:1:1:1	0.450725(0.506522:0.367391:0.478261)	NA	NA	NA	NA
	Unigene20693_All	Unigene33207_All	YN	0.0132842	0.0170375	0.779706	0.621878	1329	417.017	911.983	NA	19	7	12	NA	NA	0.0144619	11.5663:11.5663:1:1:1:1	0.450339(0.544018:0.404063:0.402935)	NA	NA	NA	NA
	Unigene67458_All	Unigene65859_All	YN	0.0104666	0.0134542	0.777946	0.576964	1722	374.975	1347.03	NA	19	5	14	NA	NA	0.0111172	1.89339:1.89339:1:1:1:1	0.444828(0.508621:0.503448:0.322414)	NA	NA	NA	NA
	Unigene41506_All	Unigene26001_All	YN	0.0122705	0.0159399	0.769797	0.423965	684	190.477	493.523	NA	9	3	6	NA	NA	0.0132923	3.89936:3.89936:1:1:1:1	0.432749(0.515351:0.372807:0.410088)	NA	NA	NA	NA
	Unigene7182_All	Unigene21041_All	YN	0.0109763	0.0142691	0.769236	0.680089	855	212.251	642.749	NA	10	3	7	NA	NA	0.0117937	3.85173:3.85173:1:1:1:1	0.437427(0.512281:0.450877:0.349123)	NA	NA	NA	NA
	Unigene3697_All	Unigene3441_All	YN	0.00304138	0.00396466	0.767123	0.748335	912	252.896	659.104	NA	3	1	2	NA	NA	0.0032974	2:2:1:1:1:1	0.442786(0.49403:0.40597:0.428358)	NA	NA	NA	NA
	Unigene23955_All	Unigene2234_All	YN	0.00829852	0.0108403	0.765527	0.736323	1584	372.228	1211.77	NA	14	4	10	NA	NA	0.00889581	1.69764:1.69764:1:1:1:1	0.415468(0.464029:0.377698:0.404676)	NA	NA	NA	NA
	Unigene37175_All	Unigene25569_All	YN	0.0107065	0.0139892	0.765341	0.573023	615	144.35	470.65	NA	7	2	5	NA	NA	0.011477	1.97629:1.97629:1:1:1:1	0.39892(0.423611:0.321759:0.451389)	NA	NA	NA	NA
	Unigene25208_All	Unigene24348_All	YN	0.0036953	0.00483736	0.763909	0.58031	1500	414.784	1085.22	NA	6	2	4	NA	NA	0.00401111	4.09876:4.09876:1:1:1:1	0.407667(0.472:0.352:0.399)	NA	NA	NA	NA
	Unigene38707_All	Unigene25874_All	YN	0.0048475	0.00637497	0.760396	0.564239	1557	315.245	1241.75	NA	8	2	6	NA	NA	0.00515677	2:2:1:1:1:1	0.425177(0.506744:0.363198:0.405588)	NA	NA	NA	NA
	Unigene9079_All	Unigene26867_All	YN	0.0169261	0.0223313	0.757954	0.734354	780	181.9	598.1	NA	14	4	10	NA	NA	0.0181867	2.76766:2.76766:1:1:1:1	0.397983(0.548043:0.330961:0.314947)	NA	NA	NA	NA
	Unigene25738_All	Unigene280_All	YN	0.00955055	0.0126088	0.757451	0.732769	1164	320.489	843.511	NA	12	4	8	NA	NA	0.0103926	4.89357:4.89357:1:1:1:1	0.460784(0.52046:0.464194:0.397698)	NA	NA	NA	NA
	Unigene5697_All	Unigene20460_All	YN	0.00544885	0.00722444	0.754225	0.734391	876	139.181	736.819	NA	5	1	4	NA	NA	0.00573096	0.569606:0.569606:1:1:1:1	0.441781(0.484589:0.455479:0.385274)	NA	NA	NA	NA
	Unigene26271_All	Unigene33121_All	YN	0.0102201	0.0135875	0.752174	0.67431	1011	222.798	788.202	NA	11	3	8	NA	NA	0.0109622	1.83147:1.83147:1:1:1:1	0.418137(0.505882:0.366176:0.382353)	NA	NA	NA	NA
	Unigene68781_All	Unigene19281_All	YN	0.0185708	0.0246972	0.75194	0.470583	1101	307.926	793.074	NA	22	7.46367	14.5363	NA	NA	0.0202843	5.14857:5.14857:1:1:1:1	0.483696(0.52038:0.375:0.555707)	NA	NA	NA	NA
	Unigene22286_All	Unigene37602_All	YN	0.00347146	0.00462701	0.75026	0.740677	1083	216.79	866.21	NA	4	1	3	NA	NA	0.00370277	0.915059:0.915059:1:1:1:1	0.430884(0.513123:0.360892:0.418635)	NA	NA	NA	NA
	Unigene7860_All	Unigene23485_All	YN	0.014796	0.019723	0.750189	0.567665	1281	256.859	1024.14	NA	20	5	15	NA	NA	0.0157839	2.25576:2.25576:1:1:1:1	0.384529(0.445067:0.399103:0.309417)	NA	NA	NA	NA
	Unigene3626_All	Unigene22929_All	YN	0.0141575	0.0189351	0.747688	0.56284	981	267.408	713.592	NA	15	5	10	NA	NA	0.0154598	5.98156:5.98156:1:1:1:1	0.429664(0.444954:0.487768:0.356269)	NA	NA	NA	NA
	Unigene6146_All	Unigene30271_All	YN	0.0137903	0.0184876	0.745922	0.532197	1017	244.063	772.937	NA	15	4.44862	10.5514	NA	NA	0.0149176	3.63952:3.63952:1:1:1:1	0.412742(0.437673:0.422438:0.378116)	NA	NA	NA	NA
	Unigene19314_All	Unigene33892_All	YN	0.00837827	0.0112363	0.745646	0.556845	900	179.332	720.668	NA	8	2	6	NA	NA	0.00894775	2:2:1:1:1:1	0.406111(0.548333:0.351667:0.318333)	NA	NA	NA	NA
	Unigene3265_All	Unigene21809_All	YN	0.00345706	0.00465208	0.743121	0.561573	1881	431.304	1449.7	NA	7	2	5	NA	NA	0.00373107	1.88518:1.88518:1:1:1:1	0.425817(0.510249:0.399707:0.367496)	NA	NA	NA	NA
	Unigene5654_All	Unigene37217_All	YN	0.00704116	0.00948297	0.742505	0.570346	783	212.241	570.759	NA	6	2	4	NA	NA	0.00770303	2:2:1:1:1:1	0.492976(0.501916:0.563218:0.413793)	NA	NA	NA	NA
	Unigene23761_All	Unigene17280_All	YN	0.0156268	0.0211179	0.739976	0.729597	711	192.641	518.359	NA	12	4	8	NA	NA	0.0171146	4.53943:4.53943:1:1:1:1	0.438819(0.43038:0.478903:0.407173)	NA	NA	NA	NA
	Unigene2019_All	Unigene2563_All	YN	0.00804937	0.0109379	0.735916	0.420891	1026	276.547	749.453	NA	9	3	6	NA	NA	0.00882794	3.96231:3.96231:1:1:1:1	0.39961(0.453216:0.339181:0.406433)	NA	NA	NA	NA
	Unigene36551_All	Unigene33944_All	YN	0.00251602	0.00342457	0.734697	0.309168	1089	292.759	796.241	NA	3	1	2	NA	NA	0.00276027	2:2:1:1:1:1	0.521579(0.53168:0.476584:0.556474)	NA	NA	NA	NA
	Unigene20734_All	Unigene17345_All	YN	0.00763141	0.0104168	0.732604	0.556831	852	193.393	658.607	NA	7	2	5	NA	NA	0.00826366	3.46336:3.46336:1:1:1:1	0.442488(0.480634:0.448944:0.397887)	NA	NA	NA	NA
	Unigene19641_All	Unigene70387_All	YN	0.0135997	0.0185999	0.731168	0.670411	609	163.562	445.438	NA	9	3	6	NA	NA	0.0149426	4.81822:4.81822:1:1:1:1	0.41784(0.502347:0.370892:0.380282)	NA	NA	NA	NA
	Unigene41915_All	Unigene36888_All	YN	0.00708075	0.00975656	0.725742	0.562059	774	206.327	567.673	NA	6	2	4	NA	NA	0.00779404	2.02754:2.02754:1:1:1:1	0.463824(0.527132:0.410853:0.453488)	NA	NA	NA	NA
	Unigene40913_All	Unigene14599_All	YN	0.00616654	0.00850418	0.725119	0.561749	888	236.573	651.427	NA	6	2	4	NA	NA	0.00678931	3.57629:3.57629:1:1:1:1	0.425113(0.516892:0.371622:0.386824)	NA	NA	NA	NA
	Unigene42598_All	Unigene37648_All	YN	0.00392463	0.00542598	0.723302	0.738572	696	185.063	510.937	NA	3	1	2	NA	NA	0.00432383	2:2:1:1:1:1	0.467672(0.605603:0.420259:0.377155)	NA	NA	NA	NA
	Unigene39906_All	Unigene6790_All	YN	0.00505134	0.0069869	0.722973	0.328933	1458	343.97	1114.03	NA	8	2.39194	5.60806	NA	NA	0.00550797	3.72668:3.72668:1:1:1:1	0.411785(0.484848:0.40202:0.348485)	NA	NA	NA	NA
	Unigene517_All	Unigene456_All	YN	0.00754041	0.0104429	0.722061	0.560341	726	192.854	533.146	NA	6	2	4	NA	NA	0.00831143	2:2:1:1:1:1	0.473829(0.514463:0.404959:0.502066)	NA	NA	NA	NA
	Unigene1010_All	Unigene944_All	YN	0.00987926	0.0137165	0.720246	0.725478	1008	294.385	713.615	NA	11	4	7	NA	NA	0.0109999	6.40559:6.40559:1:1:1:1	0.453869(0.5:0.388393:0.473214)	NA	NA	NA	NA
	Unigene39146_All	Unigene20760_All	YN	0.00847689	0.0117721	0.720086	0.292514	876	190.1	685.9	NA	8	2.21962	5.78038	NA	NA	0.00919197	0.776449:0.776449:1:1:1:1	0.421444(0.498408:0.401274:0.36465)	NA	NA	NA	NA
	Unigene19497_All	Unigene34900_All	YN	0.00567247	0.00790481	0.717597	0.558054	963	254.633	708.367	NA	6	2	4	NA	NA	0.00626273	5.75611:5.75611:1:1:1:1	0.455348(0.554517:0.476636:0.334891)	NA	NA	NA	NA
	Unigene46102_All	Unigene67578_All	YN	0.0121101	0.0169521	0.714373	0.509084	1155	239.231	915.769	NA	15	4	11	NA	NA	0.013113	0.944185:0.944185:1:1:1:1	0.43251(0.514815:0.369136:0.41358)	NA	NA	NA	NA
	Unigene1381_All	Unigene17870_All	YN	0.00717843	0.0100671	0.713058	0.419095	1140	300.004	839.996	NA	9	3	6	NA	NA	0.00793862	3.59548:3.59548:1:1:1:1	0.420175(0.493421:0.389474:0.377632)	NA	NA	NA	NA
	Unigene39542_All	Unigene38669_All	YN	0.0084984	0.0119535	0.710953	0.554906	642	168.651	473.349	NA	6	2	4	NA	NA	0.00940605	2:2:1:1:1:1	0.424658(0.449772:0.369863:0.454338)	NA	NA	NA	NA
	Unigene19500_All	Unigene25014_All	YN	0.00392854	0.00554314	0.708722	0.553296	1383	362.142	1020.86	NA	6	2	4	NA	NA	0.00435133	2:2:1:1:1:1	0.472583(0.505411:0.452381:0.459957)	NA	NA	NA	NA
	Unigene4200_All	Unigene23138_All	YN	0.00203217	0.00286813	0.708534	0.734527	1335	349.326	985.674	NA	3	1	2	NA	NA	0.00225091	2:2:1:1:1:1	0.426217(0.457303:0.417978:0.403371)	NA	NA	NA	NA
	Unigene10846_All	Unigene16475_All	YN	0.00484717	0.00684932	0.707687	0.552936	1122	293.574	828.426	NA	6	2	4	NA	NA	0.00537104	5.69349:5.69349:1:1:1:1	0.447997(0.547315:0.443734:0.352941)	NA	NA	NA	NA
	Unigene19270_All	Unigene11165_All	YN	0.0138203	0.0195511	0.70688	0.415865	1044	312.052	731.948	NA	16	6	10	NA	NA	0.0155332	14.7159:14.7159:1:1:1:1	0.403111(0.529333:0.332:0.348)	NA	NA	NA	NA
	Unigene15966_All	Unigene24740_All	YN	0.0584375	0.0826961	0.706654	0.17434	1122	324.265	797.735	NA	70	25.2571	44.7429	NA	NA	0.0654484	2.79456:2.79456:1:1:1:1	0.466667(0.52987:0.45974:0.41039)	NA	NA	NA	NA
	Unigene7077_All	Unigene20638_All	YN	0.0111296	0.0158184	0.703586	0.662211	735	191.659	543.341	NA	9	3	6	NA	NA	0.0123523	2:2:1:1:1:1	0.50271(0.550813:0.434959:0.522358)	NA	NA	NA	NA
	Unigene41633_All	Unigene606_All	YN	0.0121788	0.0173111	0.703526	0.381283	1935	526.782	1408.22	NA	26	9	17	NA	NA	0.013576	5.24211:5.24211:1:1:1:1	0.427846(0.575457:0.368902:0.339177)	NA	NA	NA	NA
	Unigene10721_All	Unigene16247_All	YN	0.00286721	0.00407561	0.703506	0.733535	945	246.125	698.875	NA	3	1	2	NA	NA	0.00318194	2:2:1:1:1:1	0.445503(0.574603:0.4:0.361905)	NA	NA	NA	NA
	Unigene37679_All	Unigene30979_All	YN	0.00940473	0.0134007	0.701811	0.663232	762	226.169	535.831	NA	8	3	5	NA	NA	0.0105908	7.78272:7.78272:1:1:1:1	0.405512(0.419291:0.364173:0.433071)	NA	NA	NA	NA
	Unigene15683_All	Unigene27485_All	YN	0.00850043	0.0121441	0.699966	0.50569	1161	332.053	828.947	NA	11	4	7	NA	NA	0.00954253	5.01918:5.01918:1:1:1:1	0.425926(0.501292:0.344961:0.431525)	NA	NA	NA	NA
	Unigene122829_All	Unigene82946_All	YN	0.00292452	0.00420255	0.695892	0.73153	924	238.618	685.382	NA	3	1	2	NA	NA	0.00325456	2:2:1:1:1:1	0.43983(0.479233:0.391374:0.448882)	NA	NA	NA	NA
	Unigene34210_All	Unigene8376_All	YN	0.0111402	0.0160217	0.695317	0.661542	642	189.519	452.481	NA	8	3	5	NA	NA	0.0125812	4.88662:4.88662:1:1:1:1	0.451713(0.471963:0.471963:0.411215)	NA	NA	NA	NA
	Unigene25352_All	Unigene21999_All	YN	0.0104908	0.0150961	0.694931	0.658706	873	200.733	672.267	NA	10	3	7	NA	NA	0.0115497	1.86511:1.86511:1:1:1:1	0.405797(0.434783:0.411491:0.371118)	NA	NA	NA	NA
	Unigene3891_All	Unigene37303_All	YN	0.0027155	0.00391105	0.694315	0.422281	2412	389.037	2022.96	NA	7	1.51693	5.48307	NA	NA	0.00290833	0.618006:0.618006:1:1:1:1	0.392225(0.466513:0.352771:0.35739)	NA	NA	NA	NA
	Unigene25723_All	Unigene22562_All	YN	0.00868319	0.0125115	0.694017	0.658482	1053	241.785	811.215	NA	10	3	7	NA	NA	0.00956223	3.5288:3.5288:1:1:1:1	0.474834(0.508547:0.485755:0.430199)	NA	NA	NA	NA
	Unigene47121_All	Unigene40112_All	YN	0.00273439	0.0039465	0.692865	0.73073	987	254.056	732.944	NA	3	1	2	NA	NA	0.00304639	2:2:1:1:1:1	0.443262(0.521277:0.398176:0.410334)	NA	NA	NA	NA
	Unigene28674_All	Unigene36902_All	YN	0.0073964	0.0106844	0.69226	0.545352	732	188.525	543.475	NA	6	2	4	NA	NA	0.00824322	2:2:1:1:1:1	0.435792(0.530738:0.348361:0.428279)	NA	NA	NA	NA
	Unigene74299_All	Unigene25069_All	YN	0.0104776	0.0151411	0.691997	0.66034	681	200.142	480.858	NA	8	3	5	NA	NA	0.0118482	3.91488:3.91488:1:1:1:1	0.404382(0.432271:0.300797:0.48008)	NA	NA	NA	NA
	Unigene2588_All	Unigene21952_All	YN	0.0106951	0.0154657	0.691537	0.203407	1044	196.374	847.626	NA	12	3	9	NA	NA	0.0115925	0.675638:0.675638:1:1:1:1	0.44(0.552857:0.414286:0.352857)	NA	NA	NA	NA
	Unigene38100_All	Unigene26466_All	YN	0.00695584	0.0100593	0.691485	0.65894	1167	300.275	866.725	NA	9	3	6	NA	NA	0.00775437	2.85284:2.85284:1:1:1:1	0.445159(0.502571:0.473008:0.359897)	NA	NA	NA	NA
	Unigene37963_All	Unigene33960_All	YN	0.00183689	0.00265844	0.690966	0.730118	1467	376.827	1090.17	NA	3	1	2	NA	NA	0.00204792	2:2:1:1:1:1	0.476823(0.456033:0.43047:0.543967)	NA	NA	NA	NA
	Unigene8393_All	Unigene37257_All	YN	0.00432593	0.00626295	0.690717	0.730527	624	160.337	463.663	NA	3	1	2	NA	NA	0.00482365	2:2:1:1:1:1	0.446288(0.523697:0.417062:0.398104)	NA	NA	NA	NA
	Unigene9742_All	Unigene8858_All	YN	0.0075155	0.0109053	0.689163	0.526589	1686	420.091	1265.91	NA	14	4.53605	9.46395	NA	NA	0.00836011	3.19483:3.19483:1:1:1:1	0.392551(0.461415:0.340836:0.375402)	NA	NA	NA	NA
	Unigene2990_All	Unigene17655_All	YN	0.0161206	0.0233929	0.689124	0.425916	696	130.254	565.746	NA	12	3	9	NA	NA	0.0174816	2:2:1:1:1:1	0.386494(0.489224:0.359914:0.310345)	NA	NA	NA	NA
	Unigene7375_All	Unigene71507_All	YN	0.00792061	0.0115165	0.687763	0.53391	810	175.001	634.999	NA	7	2	5	NA	NA	0.0086975	2.03666:2.03666:1:1:1:1	0.437863(0.517422:0.43554:0.360627)	NA	NA	NA	NA
	Unigene29770_All	Unigene16314_All	YN	0.00470593	0.00686238	0.685757	0.541509	1146	292.779	853.221	NA	6	2	4	NA	NA	0.00525686	3.75844:3.75844:1:1:1:1	0.378632(0.45:0.303846:0.382051)	NA	NA	NA	NA
	Unigene24516_All	Unigene7445_All	YN	0.00922328	0.0134536	0.685562	0.658813	771	225.276	545.724	NA	8	3	5	NA	NA	0.0104593	5.75941:5.75941:1:1:1:1	0.472436(0.565385:0.461538:0.390385)	NA	NA	NA	NA
	Unigene5016_All	Unigene33454_All	YN	0.0103057	0.0150778	0.683503	0.6556	885	200.975	684.025	NA	10	3	7	NA	NA	0.0113894	1.83956:1.83956:1:1:1:1	0.469492(0.530508:0.457627:0.420339)	NA	NA	NA	NA
	Unigene36114_All	Unigene35843_All	YN	0.00191837	0.00280671	0.683494	0.728273	1401	357.067	1043.93	NA	3	1	2	NA	NA	0.00214477	1.96218:1.96218:1:1:1:1	0.434254(0.517751:0.357988:0.427022)	NA	NA	NA	NA
	Unigene3796_All	Unigene14741_All	YN	0.0073595	0.0107843	0.682427	0.541741	1698	466.978	1231.02	NA	14	5	9	NA	NA	0.00830138	14.8534:14.8534:1:1:1:1	0.413068(0.497508:0.39701:0.344684)	NA	NA	NA	NA
	Unigene65150_All	Unigene61144_All	YN	0.00393078	0.0057758	0.68056	0.727828	684	173.804	510.196	NA	3	1	2	NA	NA	0.0043996	2:2:1:1:1:1	0.433761(0.544872:0.42094:0.33547)	NA	NA	NA	NA
	Unigene25482_All	Unigene26148_All	YN	0.0134644	0.0197965	0.680137	0.316043	1404	370.806	1033.19	NA	21	7.22521	13.7748	NA	NA	0.0151367	5.11497:5.11497:1:1:1:1	0.415254(0.46928:0.417373:0.35911)	NA	NA	NA	NA
	Unigene35060_All	Unigene25156_All	YN	0.0054376	0.00799754	0.679909	0.539004	990	251.585	738.415	NA	6	2	4	NA	NA	0.00608815	3.70933:3.70933:1:1:1:1	0.407071(0.5:0.34697:0.374242)	NA	NA	NA	NA
	Unigene17968_All	Unigene40468_All	YN	0.0200068	0.0294261	0.6799	0.470651	987	277.235	709.765	NA	22	8	14	NA	NA	0.0226526	2.96124:2.96124:1:1:1:1	0.483283(0.537994:0.384498:0.527356)	NA	NA	NA	NA
	Unigene398_All	Unigene45151_All	YN	0.00188634	0.00278068	0.678373	0.726952	1422	360.412	1061.59	NA	3	1	2	NA	NA	0.00211301	2:2:1:1:1:1	0.437764(0.448312:0.359705:0.505274)	NA	NA	NA	NA
	Unigene18345_All	Unigene10367_All	YN	0.00186182	0.00274991	0.677047	0.726606	1440	364.447	1075.55	NA	3	1	2	NA	NA	0.00208658	2:2:1:1:1:1	0.443403(0.496875:0.365625:0.467708)	NA	NA	NA	NA
	Unigene33599_All	Unigene3810_All	YN	0.00414316	0.00613025	0.675854	0.726826	648	163.942	484.058	NA	3	1	2	NA	NA	0.00464589	2:2:1:1:1:1	0.45679(0.5:0.361111:0.509259)	NA	NA	NA	NA
	Unigene18736_All	Unigene16244_All	YN	0.0139938	0.0207169	0.675475	0.290215	702	196.31	505.69	NA	11	4	7	NA	NA	0.0158739	4.10658:4.10658:1:1:1:1	0.454183(0.496016:0.454183:0.412351)	NA	NA	NA	NA
	Unigene27144_All	Unigene8719_All	YN	0.0027427	0.00407916	0.672369	0.534758	1953	491.825	1461.17	NA	6	2	4	NA	NA	0.00307926	1.97661:1.97661:1:1:1:1	0.419207(0.479681:0.396952:0.380987)	NA	NA	NA	NA
	Unigene3677_All	Unigene7820_All	YN	0.0139364	0.0207458	0.671771	0.540532	969	244.671	724.329	NA	15	5	10	NA	NA	0.0156558	1.96494:1.96494:1:1:1:1	0.442208(0.448916:0.430341:0.447368)	NA	NA	NA	NA
	Unigene15845_All	Unigene15818_All	YN	0.0116263	0.0173104	0.671634	0.654583	609	175.314	433.686	NA	8	3	5	NA	NA	0.0132626	3.19594:3.19594:1:1:1:1	0.439245(0.487685:0.359606:0.470443)	NA	NA	NA	NA
	Unigene37528_All	Unigene37366_All	YN	0.00772072	0.0115005	0.671339	0.534663	696	175.242	520.758	NA	6	2	4	NA	NA	0.00867241	2:2:1:1:1:1	0.445122(0.487805:0.392276:0.455285)	NA	NA	NA	NA
	Unigene5166_All	Unigene44844_All	YN	0.00695986	0.0103775	0.670671	0.653221	1158	291.362	866.638	NA	9	3	6	NA	NA	0.00781976	3.61944:3.61944:1:1:1:1	0.422764(0.50122:0.368293:0.39878)	NA	NA	NA	NA
	Unigene2875_All	Unigene17603_All	YN	0.00256938	0.00383984	0.669136	0.724558	1041	261.095	779.905	NA	3	1	2	NA	NA	0.00288802	2:2:1:1:1:1	0.472142(0.517291:0.527378:0.371758)	NA	NA	NA	NA
	Unigene73588_All	Unigene11815_All	YN	0.00279488	0.00417943	0.668723	0.724582	957	240.02	716.98	NA	3	1	2	NA	NA	0.00314213	1.91785:1.91785:1:1:1:1	0.46813(0.471787:0.440439:0.492163)	NA	NA	NA	NA
	Unigene4414_All	Unigene34305_All	YN	0.00429161	0.00642021	0.668452	0.724665	624	156.426	467.574	NA	3	1	2	NA	NA	0.00482521	2:2:1:1:1:1	0.467949(0.550481:0.355769:0.497596)	NA	NA	NA	NA
	Unigene6485_All	Unigene1795_All	YN	0.0034814	0.00522269	0.666591	0.724083	768	192.139	575.861	NA	3	1	2	NA	NA	0.00391704	2.02904:2.02904:1:1:1:1	0.423423(0.442085:0.393822:0.434363)	NA	NA	NA	NA
	Unigene37372_All	Unigene4920_All	YN	0.00834994	0.0125907	0.663186	0.49104	1044	320.91	723.09	NA	10	4	6	NA	NA	0.00965347	6.77892:6.77892:1:1:1:1	0.444444(0.510057:0.400862:0.422414)	NA	NA	NA	NA
	Unigene40453_All	Unigene13359_All	YN	0.0063905	0.00965438	0.661927	0.534724	1779	521.24	1257.76	NA	13	5	8	NA	NA	0.0073468	9.44495:9.44495:1:1:1:1	0.426332(0.53605:0.373824:0.369122)	NA	NA	NA	NA
	Unigene5921_All	Unigene28721_All	YN	0.00821093	0.0124105	0.661612	0.486977	1305	325.091	979.909	NA	12	4	8	NA	NA	0.00925709	3.63163:3.63163:1:1:1:1	0.408228(0.5:0.386076:0.338608)	NA	NA	NA	NA
	Unigene42548_All	Unigene37795_All	YN	0.0112801	0.0170695	0.660835	0.416369	714	178.019	535.981	NA	9	3	6	NA	NA	0.0127236	1.90466:1.90466:1:1:1:1	0.486695(0.516807:0.380252:0.563025)	NA	NA	NA	NA
	Unigene36556_All	Unigene33815_All	YN	0.00822691	0.0124823	0.659087	0.231431	651	161.564	489.436	NA	6	2	4	NA	NA	0.009283	3.67387:3.67387:1:1:1:1	0.390169(0.493088:0.334101:0.343318)	NA	NA	NA	NA
	Unigene42780_All	Unigene26676_All	YN	0.00728647	0.0110722	0.65809	0.340695	2385	728.949	1656.05	NA	20	8	12	NA	NA	0.00844352	12.4333:12.4333:1:1:1:1	0.413836(0.475472:0.352201:0.413836)	NA	NA	NA	NA
	Unigene25037_All	Unigene493_All	YN	0.00865608	0.0131808	0.656717	0.527206	618	153.121	464.879	NA	6	2	4	NA	NA	0.00977717	1.91988:1.91988:1:1:1:1	0.469256(0.480583:0.463592:0.463592)	NA	NA	NA	NA
	Unigene28129_All	Unigene16425_All	YN	0.00213722	0.00325563	0.656469	0.72111	1245	307.827	937.173	NA	3	1	2	NA	NA	0.00241375	1.96051:1.96051:1:1:1:1	0.458635(0.56506:0.409639:0.401205)	NA	NA	NA	NA
	Unigene22402_All	Unigene15701_All	YN	0.00400078	0.00610058	0.655802	0.721238	666	164.586	501.414	NA	3	1	2	NA	NA	0.00451969	2:2:1:1:1:1	0.436376(0.475104:0.329876:0.504149)	NA	NA	NA	NA
	Unigene17296_All	Unigene25266_All	YN	0.00766858	0.0118045	0.649629	0.531614	1476	426.908	1049.09	NA	13	5	8	NA	NA	0.00886484	4.89244:4.89244:1:1:1:1	0.442191(0.51927:0.38641:0.420892)	NA	NA	NA	NA
	Unigene370_All	Unigene16478_All	YN	0.00536351	0.00825639	0.64962	0.52947	1920	609.807	1310.19	NA	12	5	7	NA	NA	0.00628231	5.30793:5.30793:1:1:1:1	0.450311(0.583851:0.376553:0.390528)	NA	NA	NA	NA
	Unigene74446_All	Unigene8368_All	YN	0.00613808	0.0094819	0.647346	0.711343	597	106.228	490.772	NA	4	1	3	NA	NA	0.00673306	0.954001:0.954001:1:1:1:1	0.403685(0.459799:0.341709:0.409548)	NA	NA	NA	NA
	Unigene319_All	Unigene29587_All	YN	0.00217084	0.00336066	0.645957	0.718326	1221	298.363	922.637	NA	3	1	2	NA	NA	0.00246158	2:2:1:1:1:1	0.423014(0.486486:0.358722:0.423833)	NA	NA	NA	NA
	Unigene31304_All	Unigene40483_All	YN	0.00284228	0.00440179	0.64571	0.718379	933	227.954	705.046	NA	3	1	2	NA	NA	0.0032233	1.91475:1.91475:1:1:1:1	0.414414(0.516517:0.321321:0.405405)	NA	NA	NA	NA
	Unigene15059_All	Unigene12659_All	YN	0.00989105	0.0153337	0.645052	0.452876	885	245.623	639.377	NA	10	3.72759	6.27241	NA	NA	0.0114016	7.67035:7.67035:1:1:1:1	0.39887(0.459322:0.371186:0.366102)	NA	NA	NA	NA
	Unigene22349_All	Unigene3910_All	YN	0.00393775	0.00611448	0.644004	0.519942	1347	328.428	1018.57	NA	6	2	4	NA	NA	0.00446848	1.97345:1.97345:1:1:1:1	0.436526(0.513363:0.346325:0.449889)	NA	NA	NA	NA
	Unigene43954_All	Unigene3610_All	YN	0.0113854	0.0176993	0.64327	0.478132	1026	228.675	797.325	NA	13	4	9	NA	NA	0.0127927	3.65731:3.65731:1:1:1:1	0.401639(0.441257:0.424863:0.338798)	NA	NA	NA	NA
	Unigene37722_All	Unigene35070_All	YN	0.0139931	0.0217605	0.643052	0.478957	693	186.605	506.395	NA	11	4	7	NA	NA	0.0160847	10.2623:10.2623:1:1:1:1	0.396825(0.554113:0.348485:0.287879)	NA	NA	NA	NA
	Unigene1414_All	Unigene26887_All	YN	0.00263542	0.00410157	0.642538	0.717415	1005	244.576	760.424	NA	3	1	2	NA	NA	0.00299222	2:2:1:1:1:1	0.451244(0.531343:0.432836:0.389552)	NA	NA	NA	NA
	Unigene7398_All	Unigene8430_All	YN	0.00362018	0.00563432	0.642523	0.717561	732	178.151	553.849	NA	3	1	2	NA	NA	0.00411037	1.91641:1.91641:1:1:1:1	0.437922(0.508097:0.32996:0.475709)	NA	NA	NA	NA
	Unigene40833_All	Unigene33766_All	YN	0.00363458	0.00565839	0.642335	0.71753	729	177.396	551.604	NA	3	1	2	NA	NA	0.00412706	2:2:1:1:1:1	0.430041(0.518519:0.333333:0.438272)	NA	NA	NA	NA
	Unigene19380_All	Unigene5007_All	YN	0.00353949	0.00551231	0.642106	0.51899	1497	364.226	1132.77	NA	6	2	4	NA	NA	0.00401949	2:2:1:1:1:1	0.462409(0.526946:0.44511:0.41517)	NA	NA	NA	NA
	Unigene29592_All	Unigene17742_All	YN	0.00772145	0.0120264	0.642043	0.478695	1377	335.404	1041.6	NA	12	4	8	NA	NA	0.00877003	2.40522:2.40522:1:1:1:1	0.424837(0.460784:0.455338:0.358388)	NA	NA	NA	NA
	Unigene42301_All	Unigene33494_All	YN	0.00807507	0.0125808	0.641857	0.51029	783	160.354	622.646	NA	7	2	5	NA	NA	0.00899781	0.950782:0.950782:1:1:1:1	0.419476(0.531835:0.318352:0.40824)	NA	NA	NA	NA
	Unigene13475_All	Unigene24003_All	YN	0.00366434	0.00571417	0.641273	0.717176	723	175.671	547.329	NA	3	1	2	NA	NA	0.0041624	2:2:1:1:1:1	0.430844(0.510373:0.33195:0.450207)	NA	NA	NA	NA
	Unigene476_All	Unigene17349_All	YN	0.014693	0.0230661	0.636993	0.476094	726	176.095	549.905	NA	12	4	8	NA	NA	0.0167239	1.84937:1.84937:1:1:1:1	0.485537(0.535124:0.423554:0.497934)	NA	NA	NA	NA
	Unigene40352_All	Unigene8471_All	YN	0.00450919	0.00708336	0.636589	0.529343	951	283.687	667.313	NA	5	2	3	NA	NA	0.00527708	2.03093:2.03093:1:1:1:1	0.497897(0.533123:0.561514:0.399054)	NA	NA	NA	NA
	Unigene41867_All	Unigene23625_All	YN	0.00846986	0.0133178	0.635979	0.515857	627	151.512	475.488	NA	6	2	4	NA	NA	0.00964135	3.93479:3.93479:1:1:1:1	0.394737(0.485646:0.351675:0.34689)	NA	NA	NA	NA
	Unigene28261_All	Unigene19534_All	YN	0.00329745	0.00520129	0.633967	0.51448	1602	385.855	1216.15	NA	6	2	4	NA	NA	0.003756	2:2:1:1:1:1	0.409746(0.462803:0.347751:0.418685)	NA	NA	NA	NA
	Unigene19066_All	Unigene16265_All	YN	0.00729064	0.0115015	0.633888	0.427903	1068	303.377	764.623	NA	9	3.454	5.546	NA	NA	0.00848677	5.75654:5.75654:1:1:1:1	0.429307(0.54073:0.34691:0.400281)	NA	NA	NA	NA
	Unigene40269_All	Unigene2840_All	YN	0.00561728	0.00886426	0.6337	0.436498	786	187.6	598.4	NA	5	1.6512	3.3488	NA	NA	0.00639226	1.00089:1.00089:1:1:1:1	0.423977(0.463158:0.45614:0.352632)	NA	NA	NA	NA
	Unigene41470_All	Unigene7989_All	YN	0.00680683	0.010755	0.6329	0.400847	2334	562.466	1771.53	NA	18	6	12	NA	NA	0.00775829	2.61439:2.61439:1:1:1:1	0.415764(0.497593:0.395909:0.353791)	NA	NA	NA	NA
	Unigene11388_All	Unigene38052_All	YN	0.010214	0.0161454	0.632623	0.408774	681	188.133	492.867	NA	8	3	5	NA	NA	0.0118526	2.53931:2.53931:1:1:1:1	0.4721(0.629956:0.376652:0.409692)	NA	NA	NA	NA
	Unigene5918_All	Unigene34655_All	YN	0.00813685	0.0128827	0.631611	0.290311	1302	313.278	988.722	NA	12	4	8	NA	NA	0.00927877	1.96514:1.96514:1:1:1:1	0.449358(0.513605:0.4161:0.418367)	NA	NA	NA	NA
	Unigene29949_All	Unigene1762_All	YN	0.00395931	0.00629859	0.628602	0.713831	666	159.527	506.473	NA	3	1	2	NA	NA	0.00451964	2:2:1:1:1:1	0.421695(0.525862:0.400862:0.338362)	NA	NA	NA	NA
	Unigene26579_All	Unigene32729_All	YN	0.0211897	0.033787	0.627154	0.162437	1638	487.243	1150.76	NA	40	16	24	NA	NA	0.0249369	6.66874:6.66874:1:1:1:1	0.406179(0.471088:0.387755:0.359694)	NA	NA	NA	NA
	Unigene23719_All	Unigene12185_All	YN	0.00418396	0.00667445	0.626862	0.713387	630	150.602	479.398	NA	3	1	2	NA	NA	0.00477931	1.9324:1.9324:1:1:1:1	0.451587(0.511905:0.433333:0.409524)	NA	NA	NA	NA
	Unigene42047_All	Unigene7704_All	YN	0.00399215	0.00636882	0.626828	0.713225	660	157.683	502.317	NA	3	1	2	NA	NA	0.00455997	2:2:1:1:1:1	0.427407(0.531111:0.317778:0.433333)	NA	NA	NA	NA
	Unigene29895_All	Unigene7782_All	YN	0.00395627	0.00631316	0.62667	0.713147	666	159.067	506.933	NA	3	1	2	NA	NA	0.00451919	2:2:1:1:1:1	0.455706(0.504505:0.335586:0.527027)	NA	NA	NA	NA
	Unigene36646_All	Unigene35868_All	YN	0.00754668	0.0120524	0.626157	0.399472	1050	250.919	799.081	NA	9	3	6	NA	NA	0.00862341	1.90144:1.90144:1:1:1:1	0.447539(0.55571:0.423398:0.36351)	NA	NA	NA	NA
	Unigene37725_All	Unigene207_All	YN	0.00388578	0.00620632	0.6261	0.713127	678	161.926	516.074	NA	3	1	2	NA	NA	0.00443999	2.01:2.01:1:1:1:1	0.454277(0.588496:0.462389:0.311947)	NA	NA	NA	NA
	Unigene21888_All	Unigene21381_All	YN	0.00381648	0.00610112	0.625538	0.712802	690	164.572	525.428	NA	3	1	2	NA	NA	0.00436139	2.00973:2.00973:1:1:1:1	0.404382(0.462151:0.326693:0.424303)	NA	NA	NA	NA
	Unigene22103_All	Unigene33982_All	YN	0.00503046	0.00804707	0.62513	0.364409	2223	625.52	1597.48	NA	13	5	8	NA	NA	0.00587929	4.50387:4.50387:1:1:1:1	0.38522(0.44407:0.315364:0.396226)	NA	NA	NA	NA
	Unigene19482_All	Unigene37541_All	YN	0.00458152	0.00733542	0.624575	0.408046	1506	411.262	1094.74	NA	8	3	5	NA	NA	0.00533356	3.91977:3.91977:1:1:1:1	0.428287(0.492032:0.358566:0.434263)	NA	NA	NA	NA
	Unigene36854_All	Unigene30297_All	YN	0.00306601	0.00491081	0.624339	0.509423	1716	408.6	1307.4	NA	6	2	4	NA	NA	0.00350527	3.85093:3.85093:1:1:1:1	0.393011(0.460484:0.367742:0.350806)	NA	NA	NA	NA
	Unigene6597_All	Unigene25420_All	YN	0.00774191	0.0124114	0.623772	0.407523	894	244.002	649.998	NA	8	3	5	NA	NA	0.00901638	5.24674:5.24674:1:1:1:1	0.446272(0.514803:0.452303:0.371711)	NA	NA	NA	NA
	Unigene21255_All	Unigene25935_All	YN	0.00441736	0.00710761	0.621498	0.508156	1191	282.789	908.211	NA	6	2	4	NA	NA	0.00505613	2.16614:2.16614:1:1:1:1	0.436825(0.528678:0.422693:0.359102)	NA	NA	NA	NA
	Unigene38132_All	Unigene33642_All	YN	0.0116373	0.018747	0.620757	0.469927	909	216.167	692.833	NA	12	4	8	NA	NA	0.0133281	1.98714:1.98714:1:1:1:1	0.405391(0.462046:0.348185:0.405941)	NA	NA	NA	NA
	Unigene1219_All	Unigene23369_All	YN	0.00548173	0.00884167	0.619988	0.394859	1440	341.306	1098.69	NA	9	3	6	NA	NA	0.0062781	1.98338:1.98338:1:1:1:1	0.417014(0.5:0.395833:0.355208)	NA	NA	NA	NA
	Unigene19432_All	Unigene6108_All	YN	0.00803634	0.0129903	0.618644	0.230847	2352	661.938	1690.06	NA	22	8.49888	13.5011	NA	NA	0.00943056	4.75741:4.75741:1:1:1:1	0.396283(0.521583:0.309353:0.357914)	NA	NA	NA	NA
	Unigene45406_All	Unigene26949_All	YN	0.00311129	0.00504594	0.616593	0.710086	843	198.846	644.154	NA	3	1	2	NA	NA	0.00356764	2:2:1:1:1:1	0.412559(0.492958:0.362676:0.382042)	NA	NA	NA	NA
	Unigene42748_All	Unigene15527_All	YN	0.0106874	0.0173353	0.616508	0.497039	588	116.71	471.29	NA	7	2	5	NA	NA	0.0120069	0.870268:0.870268:1:1:1:1	0.454082(0.535714:0.423469:0.403061)	NA	NA	NA	NA
	Unigene36412_All	Unigene23781_All	YN	0.0130203	0.0211432	0.615815	0.35327	1170	240.171	929.829	NA	17	5	12	NA	NA	0.0146877	1.17287:1.17287:1:1:1:1	0.452137(0.560256:0.446154:0.35)	NA	NA	NA	NA
	Unigene36523_All	Unigene32152_All	YN	0.00411641	0.00669588	0.614768	0.504327	1275	300.078	974.922	NA	6	2	4	NA	NA	0.0047235	2.3503:2.3503:1:1:1:1	0.41236(0.469663:0.367416:0.4)	NA	NA	NA	NA
	Unigene19388_All	Unigene8468_All	YN	0.00515863	0.00839934	0.614172	0.262832	1191	275.081	915.919	NA	7	2.29306	4.70694	NA	NA	0.00590713	5.81097:5.81097:1:1:1:1	0.404282(0.507557:0.401763:0.303526)	NA	NA	NA	NA
	Unigene4861_All	Unigene12184_All	YN	0.0143248	0.0233882	0.612481	0.354969	783	217.04	565.96	NA	13	4.97871	8.02129	NA	NA	0.0168371	4.10855:4.10855:1:1:1:1	0.4118(0.538321:0.330292:0.366788)	NA	NA	NA	NA
	Unigene23763_All	Unigene37221_All	YN	0.0114021	0.0186596	0.611058	0.520047	891	271.58	619.42	NA	12	5	7	NA	NA	0.0136142	6.33814:6.33814:1:1:1:1	0.455668(0.491582:0.410774:0.464646)	NA	NA	NA	NA
	Unigene40672_All	Unigene29747_All	YN	0.00334305	0.00547801	0.610267	0.708217	783	183.215	599.785	NA	3	1	2	NA	NA	0.00384262	2:2:1:1:1:1	0.440613(0.54023:0.425287:0.356322)	NA	NA	NA	NA
	Unigene39098_All	Unigene22161_All	YN	0.00386121	0.00634074	0.608953	0.708016	678	158.466	519.534	NA	3	1	2	NA	NA	0.00444074	2:2:1:1:1:1	0.425844(0.464758:0.363436:0.449339)	NA	NA	NA	NA
	Unigene809_All	Unigene21130_All	YN	0.00798994	0.0131526	0.607479	0.465314	1188	306.895	881.105	NA	11	4	7	NA	NA	0.00932361	3.23289:3.23289:1:1:1:1	0.431624(0.524476:0.385781:0.384615)	NA	NA	NA	NA
	Unigene25596_All	Unigene16422_All	YN	0.00796539	0.0131281	0.606746	0.283346	1191	307.463	883.537	NA	11	4	7	NA	NA	0.00929816	5.19546:5.19546:1:1:1:1	0.401425(0.473872:0.380048:0.350356)	NA	NA	NA	NA
	Unigene36179_All	Unigene33692_All	YN	0.00411103	0.00677961	0.606381	0.707283	636	148.169	487.831	NA	3	1	2	NA	NA	0.00473272	2:2:1:1:1:1	0.412736(0.45283:0.410377:0.375)	NA	NA	NA	NA
	Unigene24052_All	Unigene33562_All	YN	0.00423198	0.00698178	0.606146	0.707171	618	143.898	474.102	NA	3	1	2	NA	NA	0.00487225	2:2:1:1:1:1	0.452265(0.572816:0.368932:0.415049)	NA	NA	NA	NA
	Unigene26343_All	Unigene26909_All	YN	0.00181187	0.00299302	0.605363	0.706493	1440	334.777	1105.22	NA	3	1	2	NA	NA	0.00208647	1.83165:1.83165:1:1:1:1	0.444559(0.565083:0.392562:0.376033)	NA	NA	NA	NA
	Unigene1487_All	Unigene2655_All	YN	0.00248632	0.00410784	0.605261	0.70668	1050	244.212	805.788	NA	3	1	2	NA	NA	0.00286346	2:2:1:1:1:1	0.432956(0.501416:0.409348:0.388102)	NA	NA	NA	NA
	Unigene29260_All	Unigene6951_All	YN	0.00467563	0.00772562	0.605211	0.49924	1119	260.273	858.727	NA	6	2	4	NA	NA	0.00538504	2.23159:2.23159:1:1:1:1	0.411975(0.423592:0.395442:0.41689)	NA	NA	NA	NA
	Unigene6983_All	Unigene36660_All	YN	0.00687698	0.0113812	0.60424	0.498935	762	177.135	584.865	NA	6	2	4	NA	NA	0.00792403	1.9677:1.9677:1:1:1:1	0.431102(0.456693:0.334646:0.501969)	NA	NA	NA	NA
	Unigene13560_All	Unigene38887_All	YN	0.0168098	0.0279092	0.602303	0.383606	702	220.169	481.831	NA	14	6	8	NA	NA	0.0202909	5.3962:5.3962:1:1:1:1	0.452479(0.518595:0.338843:0.5)	NA	NA	NA	NA
	Unigene8996_All	Unigene22012_All	YN	0.015402	0.0255739	0.602254	0.15201	1224	239.177	984.823	NA	21	6	15	NA	NA	0.0173896	0.309548:0.309548:1:1:1:1	0.449063(0.449878:0.380196:0.517115)	NA	NA	NA	NA
	Unigene2611_All	Unigene11528_All	YN	0.0168448	0.0279763	0.602109	0.164316	1881	439.386	1441.61	NA	36	12	24	NA	NA	0.019445	3.27396:3.27396:1:1:1:1	0.444179(0.57815:0.405104:0.349282)	NA	NA	NA	NA
	Unigene24895_All	Unigene26702_All	YN	0.0087244	0.014492	0.602016	0.392605	786	209.278	576.722	NA	8	3	5	NA	NA	0.0102601	2:2:1:1:1:1	0.479644(0.520992:0.416031:0.501908)	NA	NA	NA	NA
	Unigene71263_All	Unigene19591_All	YN	0.0131203	0.021876	0.599757	0.243636	1494	417.44	1076.56	NA	23	9	14	NA	NA	0.0155667	11.7907:11.7907:1:1:1:1	0.424359(0.5125:0.404808:0.355769)	NA	NA	NA	NA
	Unigene41563_All	Unigene16254_All	YN	0.00760343	0.012714	0.598038	0.389265	900	238.235	661.765	NA	8	3	5	NA	NA	0.00895622	7.27203:7.27203:1:1:1:1	0.418889(0.485:0.448333:0.323333)	NA	NA	NA	NA
	Unigene19735_All	Unigene18396_All	YN	0.00327621	0.00548476	0.597329	0.70433	795	182.991	612.009	NA	3	1	2	NA	NA	0.00378456	2:2:1:1:1:1	0.420755(0.537736:0.381132:0.343396)	NA	NA	NA	NA
	Unigene7746_All	Unigene29332_All	YN	0.0105462	0.0176575	0.597266	0.38107	1014	345.193	668.807	NA	13	6	7	NA	NA	0.0129671	8.49372:8.49372:1:1:1:1	0.496212(0.497159:0.603693:0.387784)	NA	NA	NA	NA
	Unigene6726_All	Unigene31746_All	YN	0.00528234	0.00884675	0.597094	0.371819	1671	341.112	1329.89	NA	10	3	7	NA	NA	0.00600996	0.945966:0.945966:1:1:1:1	0.427549(0.481216:0.372987:0.428444)	NA	NA	NA	NA
	Unigene73604_All	Unigene17007_All	YN	0.00945386	0.0158646	0.595911	0.461181	894	254.81	639.19	NA	10	4	6	NA	NA	0.0112811	7.93391:7.93391:1:1:1:1	0.421141(0.463087:0.389262:0.411074)	NA	NA	NA	NA
	Unigene2081_All	Unigene4541_All	YN	0.00813853	0.0136632	0.595652	0.347718	1359	370.155	988.845	NA	13	5	8	NA	NA	0.00964331	2.77816:2.77816:1:1:1:1	0.466519(0.573951:0.419426:0.406181)	NA	NA	NA	NA
	Unigene21430_All	Unigene60701_All	YN	0.0160641	0.0269861	0.595272	0.345035	819	189.56	629.44	NA	15	5	10	NA	NA	0.018592	2.42301:2.42301:1:1:1:1	0.43674(0.543796:0.399635:0.366788)	NA	NA	NA	NA
	Unigene41523_All	Unigene20716_All	YN	0.0236791	0.0397806	0.595244	0.170816	1041	243.575	797.425	NA	28	9.42382	18.5762	NA	NA	0.0274466	3.24131:3.24131:1:1:1:1	0.403056(0.520057:0.353868:0.335244)	NA	NA	NA	NA
	Unigene18805_All	Unigene40470_All	YN	0.00777246	0.0130587	0.595192	0.378218	1008	232.004	775.996	NA	9	3	6	NA	NA	0.00898917	1.23616:1.23616:1:1:1:1	0.443452(0.532738:0.36756:0.43006)	NA	NA	NA	NA
	Unigene36150_All	Unigene25896_All	YN	0.00172516	0.00290117	0.594645	0.703251	1506	345.356	1160.64	NA	3	1	2	NA	NA	0.00199484	2:2:1:1:1:1	0.428902(0.554563:0.383929:0.348214)	NA	NA	NA	NA
	Unigene10011_All	Unigene33949_All	YN	0.00997439	0.0167914	0.594018	0.319207	1797	483.629	1313.37	NA	21	8	13	NA	NA	0.0118091	4.89552:4.89552:1:1:1:1	0.426822(0.538397:0.360601:0.381469)	NA	NA	NA	NA
	Unigene36388_All	Unigene33362_All	YN	0.00840852	0.0141613	0.593767	0.38352	1506	428.887	1077.11	NA	15	6	9	NA	NA	0.0100468	4.9379:4.9379:1:1:1:1	0.443559(0.558765:0.437251:0.334661)	NA	NA	NA	NA
	Unigene39793_All	Unigene4570_All	YN	0.0136966	0.0230971	0.592999	0.459765	693	176.432	516.568	NA	11	4	7	NA	NA	0.0160899	3.8824:3.8824:1:1:1:1	0.425685(0.528139:0.372294:0.376623)	NA	NA	NA	NA
	Unigene18643_All	Unigene33032_All	YN	0.00592671	0.0100184	0.591581	0.384775	1149	301.728	847.272	NA	8	3	5	NA	NA	0.0070012	4.97416:4.97416:1:1:1:1	0.408017(0.503797:0.368354:0.351899)	NA	NA	NA	NA
	Unigene19213_All	Unigene34718_All	YN	0.00754102	0.0127477	0.591557	0.398047	771	237.341	533.659	NA	7	3	4	NA	NA	0.00914384	5.25518:5.25518:1:1:1:1	0.450065(0.581712:0.373541:0.394942)	NA	NA	NA	NA
	Unigene28647_All	Unigene33726_All	YN	0.0041477	0.0070171	0.591085	0.702764	627	143.297	483.703	NA	3	1	2	NA	NA	0.00480348	2:2:1:1:1:1	0.41547(0.5:0.354067:0.392344)	NA	NA	NA	NA
	Unigene26960_All	Unigene26856_All	YN	0.00351082	0.00594776	0.590276	0.383308	1935	506.666	1428.33	NA	8	3	5	NA	NA	0.00414892	7.67898:7.67898:1:1:1:1	0.442208(0.545666:0.438854:0.342105)	NA	NA	NA	NA
	Unigene39953_All	Unigene5820_All	YN	0.00576126	0.00977627	0.589311	0.490941	903	205.961	697.039	NA	6	2	4	NA	NA	0.00667703	2:2:1:1:1:1	0.429769(0.511006:0.360063:0.418239)	NA	NA	NA	NA
	Unigene42556_All	Unigene7970_All	YN	0.00773551	0.013132	0.589058	0.343433	1425	384.391	1040.61	NA	13	5	8	NA	NA	0.00919121	9.26722:9.26722:1:1:1:1	0.451228(0.530526:0.470526:0.352632)	NA	NA	NA	NA
	Unigene35087_All	Unigene17526_All	YN	0.00418461	0.00710508	0.58896	0.503821	1002	282.824	719.176	NA	5	2	3	NA	NA	0.00500894	3.78416:3.78416:1:1:1:1	0.531841(0.558209:0.5:0.537313)	NA	NA	NA	NA
	Unigene19346_All	Unigene30374_All	YN	0.00658285	0.011193	0.588121	0.458833	1734	360.627	1373.37	NA	13	4	9	NA	NA	0.00754165	1.26323:1.26323:1:1:1:1	0.434945(0.498273:0.406736:0.399827)	NA	NA	NA	NA
	Unigene36089_All	Unigene40074_All	YN	0.00587877	0.0100089	0.587353	0.489496	885	201.158	683.842	NA	6	2	4	NA	NA	0.00681754	2:2:1:1:1:1	0.445198(0.516949:0.374576:0.444068)	NA	NA	NA	NA
	Unigene9735_All	Unigene8275_All	YN	0.0155299	0.0264648	0.586812	0.382757	882	231.316	650.684	NA	16	6	10	NA	NA	0.0183977	4.13073:4.13073:1:1:1:1	0.424603(0.517007:0.430272:0.326531)	NA	NA	NA	NA
	Unigene23083_All	Unigene22069_All	YN	0.00997908	0.0170397	0.585639	0.457444	843	237.594	605.406	NA	10	4	6	NA	NA	0.0119691	4.92544:4.92544:1:1:1:1	0.447541(0.467213:0.460656:0.414754)	NA	NA	NA	NA
	Unigene29528_All	Unigene33745_All	YN	0.00880446	0.0151054	0.582868	0.478828	705	133.741	571.259	NA	7	2	5	NA	NA	0.00999977	0.631585:0.631585:1:1:1:1	0.468085(0.502128:0.468085:0.434043)	NA	NA	NA	NA
	Unigene28023_All	Unigene7241_All	YN	0.00541976	0.00931152	0.582049	0.486971	957	216.193	740.807	NA	6	2	4	NA	NA	0.00629893	1.96501:1.96501:1:1:1:1	0.407576(0.504545:0.390909:0.327273)	NA	NA	NA	NA
	Unigene45283_All	Unigene33983_All	YN	0.0120212	0.0207097	0.580462	0.218382	1650	391.901	1258.1	NA	23	8	15	NA	NA	0.0140849	2.12427:2.12427:1:1:1:1	0.447273(0.541818:0.434545:0.365455)	NA	NA	NA	NA
	Unigene4347_All	Unigene1763_All	YN	0.0129433	0.0223099	0.580162	0.339841	852	228.498	623.502	NA	13	5	8	NA	NA	0.0154553	2.30182:2.30182:1:1:1:1	0.434708(0.479381:0.517182:0.30756)	NA	NA	NA	NA
	Unigene33817_All	Unigene37861_All	YN	0.0138907	0.0239493	0.580005	0.26571	963	285.435	677.565	NA	16	6.69486	9.30514	NA	NA	0.0168721	6.96116:6.96116:1:1:1:1	0.43412(0.492625:0.40708:0.402655)	NA	NA	NA	NA
	Unigene30978_All	Unigene32713_All	YN	0.00478468	0.00825713	0.57946	0.498945	873	243.733	629.267	NA	5	2	3	NA	NA	0.00575415	3.78111:3.78111:1:1:1:1	0.444444(0.513746:0.378007:0.441581)	NA	NA	NA	NA
	Unigene597_All	Unigene17461_All	YN	0.0130629	0.0225697	0.578779	0.214503	984	243.652	740.348	NA	15	5.41666	9.58334	NA	NA	0.0154169	2.83376:2.83376:1:1:1:1	0.43829(0.462099:0.491254:0.361516)	NA	NA	NA	NA
	Unigene36017_All	Unigene8870_All	YN	0.00326357	0.00564461	0.578174	0.484541	1584	355.655	1228.34	NA	6	2	4	NA	NA	0.00379819	0.644158:0.644158:1:1:1:1	0.450216(0.548237:0.381262:0.42115)	NA	NA	NA	NA
	Unigene6554_All	Unigene34019_All	YN	0.00618307	0.0107095	0.577344	0.142177	2352	564.83	1787.17	NA	17	6	11	NA	NA	0.00727009	2.83525:2.83525:1:1:1:1	0.433174(0.539976:0.400358:0.359189)	NA	NA	NA	NA
	Unigene27316_All	Unigene23147_All	YN	0.0137118	0.0237576	0.577151	0.335888	951	214.71	736.29	NA	15	5	10	NA	NA	0.0159798	2.3166:2.3166:1:1:1:1	0.395313(0.476563:0.38125:0.328125)	NA	NA	NA	NA
	Unigene69744_All	Unigene25846_All	YN	0.0116837	0.0203155	0.575113	0.453775	804	200.164	603.836	NA	11	4	7	NA	NA	0.0138327	2.01969:2.01969:1:1:1:1	0.420468(0.440351:0.414035:0.407018)	NA	NA	NA	NA
	Unigene24867_All	Unigene5704_All	YN	0.00197643	0.0034379	0.574894	0.697141	1305	291.543	1013.46	NA	3	1	2	NA	NA	0.00230293	2:2:1:1:1:1	0.433716(0.522989:0.409195:0.368966)	NA	NA	NA	NA
	Unigene28537_All	Unigene8030_All	YN	0.00320985	0.00559078	0.574134	0.697189	804	179.534	624.466	NA	3	1	2	NA	NA	0.00374151	2:2:1:1:1:1	0.390931(0.479779:0.380515:0.3125)	NA	NA	NA	NA
	Unigene1297_All	Unigene33862_All	YN	0.00873262	0.0152712	0.571836	0.339071	1023	330.758	692.242	NA	11	5	6	NA	NA	0.0108467	6.90011:6.90011:1:1:1:1	0.430476(0.572857:0.275714:0.442857)	NA	NA	NA	NA
	Unigene21703_All	Unigene18577_All	YN	0.0125386	0.0219627	0.570905	0.180004	1911	462.598	1448.4	NA	28	10	18	NA	NA	0.0148199	3.16577:3.16577:1:1:1:1	0.411303(0.482732:0.38697:0.364207)	NA	NA	NA	NA
	Unigene9391_All	Unigene29709_All	YN	0.00588106	0.0103573	0.567817	0.380875	975	291.655	683.345	NA	7	3	4	NA	NA	0.00722006	5.95658:5.95658:1:1:1:1	0.462051(0.541538:0.44:0.404615)	NA	NA	NA	NA
	Unigene27223_All	Unigene24192_All	YN	0.00948604	0.0167526	0.566242	0.153348	606	181.115	424.885	NA	7	3	4	NA	NA	0.0116578	4.24354:4.24354:1:1:1:1	0.398754(0.425234:0.341121:0.429907)	NA	NA	NA	NA
	Unigene39272_All	Unigene36412_All	YN	0.00533477	0.00943457	0.565449	0.47784	966	213.376	752.624	NA	6	2	4	NA	NA	0.00624036	1.73911:1.73911:1:1:1:1	0.425983(0.506211:0.375776:0.395963)	NA	NA	NA	NA
	Unigene36733_All	Unigene26037_All	YN	0.0136727	0.024233	0.564217	0.33043	801	209.994	591.006	NA	13	5	8	NA	NA	0.0164412	4.78712:4.78712:1:1:1:1	0.409195(0.513793:0.368966:0.344828)	NA	NA	NA	NA
	Unigene5227_All	Unigene37972_All	YN	0.00525816	0.00933188	0.563462	0.467901	1170	215.655	954.345	NA	7	2	5	NA	NA	0.00600903	0.470076:0.470076:1:1:1:1	0.426731(0.485507:0.426329:0.368357)	NA	NA	NA	NA
	Unigene42518_All	Unigene16451_All	YN	0.0102707	0.0182338	0.56328	0.28137	1665	390.127	1274.87	NA	20	7	13	NA	NA	0.0121365	2.9113:2.9113:1:1:1:1	0.412312(0.454054:0.354054:0.428829)	NA	NA	NA	NA
	Unigene7585_All	Unigene26604_All	YN	0.00866668	0.0153968	0.562888	0.277113	1623	460.818	1162.18	NA	17	7	10	NA	NA	0.0105776	14.3048:14.3048:1:1:1:1	0.426063(0.472274:0.426987:0.378928)	NA	NA	NA	NA
	Unigene42695_All	Unigene7429_All	YN	0.0110006	0.0195571	0.562486	0.44894	666	207.313	458.687	NA	9	4	5	NA	NA	0.0136641	6.60088:6.60088:1:1:1:1	0.47973(0.497748:0.472973:0.468468)	NA	NA	NA	NA
	Unigene4329_All	Unigene5464_All	YN	0.00643393	0.011445	0.562159	0.475881	801	176.085	624.915	NA	6	2	4	NA	NA	0.00753553	2:2:1:1:1:1	0.43408(0.56903:0.345149:0.38806)	NA	NA	NA	NA
	Unigene648_All	Unigene70687_All	YN	0.0180622	0.0321498	0.561814	0.275438	729	223.912	505.088	NA	16	7	9	NA	NA	0.0223892	11.4017:11.4017:1:1:1:1	0.414324(0.516064:0.335341:0.391566)	NA	NA	NA	NA
	Unigene25347_All	Unigene16776_All	YN	0.0115072	0.0205036	0.561231	0.448669	636	197.871	438.129	NA	9	4	5	NA	NA	0.0143062	6.02847:6.02847:1:1:1:1	0.454277(0.466814:0.451327:0.44469)	NA	NA	NA	NA
	Unigene18527_All	Unigene38146_All	YN	0.00384016	0.00684335	0.561152	0.475375	1338	293.676	1044.32	NA	6	2	4	NA	NA	0.00449933	0.978142:0.978142:1:1:1:1	0.433632(0.535794:0.409396:0.355705)	NA	NA	NA	NA
	Unigene36439_All	Unigene33836_All	YN	0.00447653	0.00799394	0.55999	0.488046	924	251.577	672.423	NA	5	2	3	NA	NA	0.00543421	3.58363:3.58363:1:1:1:1	0.431818(0.448052:0.451299:0.396104)	NA	NA	NA	NA
	Unigene16854_All	Unigene23146_All	YN	0.0028023	0.0050143	0.558861	0.487197	1473	400.194	1072.81	NA	5	2	3	NA	NA	0.00340327	3.97886:3.97886:1:1:1:1	0.437037(0.510101:0.388889:0.412121)	NA	NA	NA	NA
	Unigene37758_All	Unigene1002_All	YN	0.00267466	0.00479105	0.558262	0.473563	1917	418.779	1498.22	NA	6	2	4	NA	NA	0.003137	1.00851:1.00851:1:1:1:1	0.393962(0.454345:0.341679:0.385862)	NA	NA	NA	NA
	Unigene2891_All	Unigene19362_All	YN	0.0117865	0.0211432	0.557461	0.326205	1095	239.831	855.169	NA	15	5	10	NA	NA	0.0138359	0.978974:0.978974:1:1:1:1	0.454007(0.531421:0.435792:0.394809)	NA	NA	NA	NA
	Unigene24627_All	Unigene26569_All	YN	0.00302949	0.00544008	0.556883	0.691622	846	184.488	661.512	NA	3	1	2	NA	NA	0.00355517	2:2:1:1:1:1	0.399444(0.535:0.331667:0.331667)	NA	NA	NA	NA
	Unigene36376_All	Unigene16165_All	YN	0.00423471	0.00760518	0.556819	0.486206	975	264.314	710.686	NA	5	2	3	NA	NA	0.00514842	4.07734:4.07734:1:1:1:1	0.414359(0.463077:0.392308:0.387692)	NA	NA	NA	NA
	Unigene34673_All	Unigene19718_All	YN	0.00705858	0.0126921	0.556138	0.446799	1173	317.83	855.17	NA	10	4	6	NA	NA	0.00858502	7.70735:7.70735:1:1:1:1	0.442029(0.548593:0.418159:0.359335)	NA	NA	NA	NA
	Unigene9116_All	Unigene19694_All	YN	0.00436218	0.00784816	0.555822	0.691706	588	128.179	459.821	NA	3	1	2	NA	NA	0.0051221	2:2:1:1:1:1	0.437925(0.545918:0.364796:0.403061)	NA	NA	NA	NA
	Unigene20523_All	Unigene33444_All	YN	0.0188067	0.0339053	0.554682	0.244808	774	181.562	592.438	NA	17	6	11	NA	NA	0.0223485	1.99502:1.99502:1:1:1:1	0.418713(0.45614:0.4:0.4)	NA	NA	NA	NA
	Unigene21279_All	Unigene3025_All	YN	0.00630623	0.0113931	0.553512	0.371018	903	265.584	637.416	NA	7	3	4	NA	NA	0.00780235	4.80537:4.80537:1:1:1:1	0.435216(0.495017:0.378738:0.431894)	NA	NA	NA	NA
	Unigene42187_All	Unigene34419_All	YN	0.00402851	0.00727876	0.553461	0.69084	636	138.154	497.846	NA	3	1	2	NA	NA	0.00473454	1.84539:1.84539:1:1:1:1	0.405483(0.489177:0.396104:0.331169)	NA	NA	NA	NA
	Unigene4106_All	Unigene39447_All	YN	0.00670581	0.012169	0.551055	0.326233	1464	415.092	1048.91	NA	12	5	7	NA	NA	0.00825482	5.19313:5.19313:1:1:1:1	0.434487(0.54277:0.397149:0.363544)	NA	NA	NA	NA
	Unigene28816_All	Unigene2817_All	YN	0.00667294	0.012128	0.550208	0.368208	852	249.366	602.634	NA	7	3	4	NA	NA	0.00826956	5.97199:5.97199:1:1:1:1	0.433898(0.50678:0.381356:0.413559)	NA	NA	NA	NA
	Unigene29988_All	Unigene26074_All	YN	0.0097388	0.017762	0.548295	0.12693	1800	455.99	1344.01	NA	21	8	13	NA	NA	0.0117713	3.98403:3.98403:1:1:1:1	0.4175(0.480833:0.395833:0.375833)	NA	NA	NA	NA
	Unigene8692_All	Unigene26615_All	YN	0.0119908	0.021885	0.547902	0.443782	690	185.453	504.547	NA	10	4	6	NA	NA	0.0146501	5.85373:5.85373:1:1:1:1	0.468116(0.53913:0.436957:0.428261)	NA	NA	NA	NA
	Unigene26758_All	Unigene22311_All	YN	0.0176157	0.0322042	0.546999	0.2032	945	254.924	690.076	NA	20	8	12	NA	NA	0.0215511	3.78536:3.78536:1:1:1:1	0.41592(0.420896:0.416418:0.410448)	NA	NA	NA	NA
	Unigene27073_All	Unigene10550_All	YN	0.0113022	0.0206738	0.546692	0.13148	1098	295.571	802.429	NA	15	6	9	NA	NA	0.0138249	3.84864:3.84864:1:1:1:1	0.46164(0.612434:0.437831:0.334656)	NA	NA	NA	NA
	Unigene27299_All	Unigene3520_All	YN	0.01015	0.0185802	0.546281	0.353354	660	163.771	496.229	NA	8	3	5	NA	NA	0.0122419	3.01292:3.01292:1:1:1:1	0.420455(0.518182:0.379545:0.363636)	NA	NA	NA	NA
	Unigene26495_All	Unigene5451_All	YN	0.0103661	0.0189939	0.545761	0.321948	1044	266.717	777.283	NA	13	5	8	NA	NA	0.0125703	2:2:1:1:1:1	0.42381(0.495714:0.332857:0.442857)	NA	NA	NA	NA
	Unigene28276_All	Unigene8806_All	YN	0.00302474	0.00559304	0.540805	0.477176	1353	358.922	994.078	NA	5	2	3	NA	NA	0.00370605	2:2:1:1:1:1	0.465233(0.530108:0.417204:0.448387)	NA	NA	NA	NA
	Unigene9297_All	Unigene14990_All	YN	0.0118337	0.0218908	0.540577	0.238289	1131	278.715	852.285	NA	16	6	10	NA	NA	0.0143121	5.87473:5.87473:1:1:1:1	0.451641(0.576425:0.472798:0.305699)	NA	NA	NA	NA
	Unigene9996_All	Unigene22684_All	YN	0.00952564	0.0176688	0.539122	0.441632	864	229.606	634.394	NA	10	4	6	NA	NA	0.0116897	8.06283:8.06283:1:1:1:1	0.429066(0.546713:0.446367:0.294118)	NA	NA	NA	NA
	Unigene6558_All	Unigene587_All	YN	0.00541426	0.0100637	0.538	0.346513	1227	300.15	926.85	NA	8	3	5	NA	NA	0.0065516	1.80511:1.80511:1:1:1:1	0.440618(0.492874:0.414489:0.414489)	NA	NA	NA	NA
	Unigene4130_All	Unigene25332_All	YN	0.00652436	0.0121368	0.537567	0.454115	936	166.204	769.796	NA	7	2	5	NA	NA	0.00752096	0.611234:0.611234:1:1:1:1	0.439103(0.544872:0.370192:0.402244)	NA	NA	NA	NA
	Unigene24936_All	Unigene24890_All	YN	0.0111449	0.0207345	0.537503	0.318991	1059	245.412	813.588	NA	14	5	9	NA	NA	0.0133672	1.96849:1.96849:1:1:1:1	0.422939(0.514785:0.360215:0.393817)	NA	NA	NA	NA
	Unigene5099_All	Unigene26169_All	YN	0.0141441	0.0263878	0.536009	0.181801	1128	271.525	856.475	NA	19	7	12	NA	NA	0.0170913	2.00999:2.00999:1:1:1:1	0.43484(0.433511:0.429521:0.441489)	NA	NA	NA	NA
	Unigene80684_All	Unigene25860_All	YN	0.0064348	0.0120238	0.53517	0.439852	1116	335.346	780.654	NA	9	4	5	NA	NA	0.00811424	5.87665:5.87665:1:1:1:1	0.46595(0.525538:0.393817:0.478495)	NA	NA	NA	NA
	Unigene37847_All	Unigene12507_All	YN	0.00901719	0.0168655	0.534654	0.267959	1536	420.054	1115.95	NA	17	7	10	NA	NA	0.0111635	3.58966:3.58966:1:1:1:1	0.435872(0.506836:0.352539:0.448242)	NA	NA	NA	NA
	Unigene17214_All	Unigene22457_All	YN	0.00510025	0.00954204	0.534503	0.195736	2298	527.337	1770.66	NA	14	5	9	NA	NA	0.00611954	1.44851:1.44851:1:1:1:1	0.445289(0.550063:0.448669:0.337136)	NA	NA	NA	NA
	Unigene9793_All	Unigene39585_All	YN	0.00418112	0.00782315	0.534454	0.31969	2082	642.468	1439.53	NA	11	5	6	NA	NA	0.00530498	8.02725:8.02725:1:1:1:1	0.476945(0.506484:0.430836:0.493516)	NA	NA	NA	NA
	Unigene35107_All	Unigene15795_All	YN	0.00790276	0.0148049	0.533793	0.356424	714	204.642	509.358	NA	7	3	4	NA	NA	0.00988102	5.91979:5.91979:1:1:1:1	0.435574(0.533613:0.401261:0.371849)	NA	NA	NA	NA
	Unigene21243_All	Unigene20583_All	YN	0.00515492	0.00966187	0.533533	0.460202	987	208.335	778.665	NA	6	2	4	NA	NA	0.00610625	0.983724:0.983724:1:1:1:1	0.418946(0.445289:0.401216:0.410334)	NA	NA	NA	NA
	Unigene29839_All	Unigene23095_All	YN	0.00947529	0.0177668	0.533315	0.319103	924	285.619	638.381	NA	11	5	6	NA	NA	0.0120383	8.39456:8.39456:1:1:1:1	0.441017(0.464286:0.399351:0.459416)	NA	NA	NA	NA
	Unigene23517_All	Unigene19748_All	YN	0.00686824	0.0128913	0.532779	0.197124	2091	625.92	1465.08	NA	18	8	10	NA	NA	0.00867119	17.9103:17.9103:1:1:1:1	0.419982(0.495358:0.401857:0.362732)	NA	NA	NA	NA
	Unigene26370_All	Unigene5862_All	YN	0.00357235	0.00670818	0.532536	0.683593	711	149.739	561.261	NA	3	1	2	NA	NA	0.00423277	2:2:1:1:1:1	0.422222(0.46875:0.354167:0.44375)	NA	NA	NA	NA
	Unigene8812_All	Unigene18731_All	YN	0.0123117	0.023133	0.532213	0.256335	831	175.71	655.29	NA	12	4	8	NA	NA	0.0145998	1.40776:1.40776:1:1:1:1	0.415162(0.465704:0.391697:0.388087)	NA	NA	NA	NA
	Unigene37405_All	Unigene8754_All	YN	0.00397077	0.00750183	0.529307	0.457731	1278	267.937	1010.06	NA	6	2	4	NA	NA	0.00471107	0.637224:0.637224:1:1:1:1	0.442529(0.497701:0.437931:0.391954)	NA	NA	NA	NA
	Unigene36532_All	Unigene33939_All	YN	0.00518066	0.00979074	0.529139	0.340236	1278	308.708	969.292	NA	8	3	5	NA	NA	0.00629425	2:2:1:1:1:1	0.448748(0.534038:0.399061:0.413146)	NA	NA	NA	NA
	Unigene41876_All	Unigene37622_All	YN	0.0188534	0.0356698	0.528553	0.123884	1071	318.526	752.474	NA	25	11	14	NA	NA	0.0238548	4.37681:4.37681:1:1:1:1	0.465004(0.528871:0.555118:0.311024)	NA	NA	NA	NA
	Unigene29129_All	Unigene13350_All	YN	0.00629059	0.0119093	0.528209	0.437614	1137	338.546	798.454	NA	9	4	5	NA	NA	0.00796358	6.15399:6.15399:1:1:1:1	0.403254(0.436675:0.389182:0.383905)	NA	NA	NA	NA
	Unigene1262_All	Unigene16625_All	YN	0.00544745	0.0103466	0.526495	0.351224	1029	291.954	737.046	NA	7	3	4	NA	NA	0.00683747	2.01793:2.01793:1:1:1:1	0.470845(0.508746:0.437318:0.466472)	NA	NA	NA	NA
	Unigene18083_All	Unigene70941_All	YN	0.00575297	0.0109335	0.526176	0.469232	708	184.26	523.74	NA	5	2	3	NA	NA	0.00710123	3.87467:3.87467:1:1:1:1	0.411723(0.485169:0.385593:0.364407)	NA	NA	NA	NA
	Unigene901_All	Unigene68950_All	YN	0.00541294	0.0103316	0.52392	0.26476	1503	390.393	1112.61	NA	10	4	6	NA	NA	0.00669052	2.94227:2.94227:1:1:1:1	0.437126(0.469062:0.389222:0.453094)	NA	NA	NA	NA
	Unigene26454_All	Unigene38412_All	YN	0.0163566	0.031319	0.522259	0.111406	1254	326.392	927.608	NA	25	10	15	NA	NA	0.020251	2.93665:2.93665:1:1:1:1	0.451356(0.471292:0.449761:0.433014)	NA	NA	NA	NA
	Unigene36422_All	Unigene5763_All	YN	0.00890254	0.0170579	0.5219	0.313168	975	296.499	678.501	NA	11	5	6	NA	NA	0.0113826	6.3216:6.3216:1:1:1:1	0.470907(0.591716:0.445266:0.37574)	NA	NA	NA	NA
	Unigene41413_All	Unigene17668_All	YN	0.0101688	0.0195047	0.521351	0.312521	954	260.533	693.467	NA	12	5	7	NA	NA	0.0127184	3.05243:3.05243:1:1:1:1	0.471963(0.574766:0.380062:0.461059)	NA	NA	NA	NA
	Unigene5724_All	Unigene19669_All	YN	0.00945235	0.0181523	0.520725	0.231795	1188	335.767	852.233	NA	14	6	8	NA	NA	0.0119112	6.8416:6.8416:1:1:1:1	0.431373(0.523529:0.395294:0.375294)	NA	NA	NA	NA
	Unigene51866_All	Unigene21948_All	YN	0.00154065	0.00296082	0.520345	0.678984	1638	338.513	1299.49	NA	3	1	2	NA	NA	0.00183415	2:2:1:1:1:1	0.385659(0.460133:0.399502:0.297342)	NA	NA	NA	NA
	Unigene1201_All	Unigene21810_All	YN	0.00845315	0.0162591	0.519902	0.311735	1146	311.719	834.281	NA	12	5	7	NA	NA	0.0105764	4.53128:4.53128:1:1:1:1	0.421711(0.507264:0.312349:0.445521)	NA	NA	NA	NA
	Unigene27135_All	Unigene21755_All	YN	0.00640547	0.0123213	0.519871	0.234644	1590	492.415	1097.59	NA	13	6	7	NA	NA	0.00823756	7.52004:7.52004:1:1:1:1	0.492138(0.592453:0.546226:0.337736)	NA	NA	NA	NA
	Unigene24640_All	Unigene4758_All	YN	0.0162732	0.0313381	0.519277	0.191198	945	260.844	684.156	NA	19	8	11	NA	NA	0.0204315	3.21346:3.21346:1:1:1:1	0.451323(0.555556:0.380952:0.41746)	NA	NA	NA	NA
	Unigene5002_All	Unigene24953_All	YN	0.00323095	0.00622498	0.51903	0.345823	1725	484.218	1240.78	NA	7	3	4	NA	NA	0.0040714	3.95308:3.95308:1:1:1:1	0.453913(0.507826:0.437391:0.416522)	NA	NA	NA	NA
	Unigene19518_All	Unigene14788_All	YN	0.00385478	0.00744175	0.517994	0.344764	1446	405.134	1040.87	NA	7	3	4	NA	NA	0.00485977	5.95166:5.95166:1:1:1:1	0.443292(0.520747:0.4139:0.395228)	NA	NA	NA	NA
	Unigene22426_All	Unigene577_All	YN	0.00371688	0.0071868	0.517182	0.450849	1359	279.624	1079.38	NA	6	2	4	NA	NA	0.00443084	2:2:1:1:1:1	0.433696(0.517391:0.4:0.383696)	NA	NA	NA	NA
	Unigene885_All	Unigene23477_All	YN	0.00337127	0.00652468	0.516694	0.463656	1200	307.864	892.136	NA	5	2	3	NA	NA	0.00418029	3.83497:3.83497:1:1:1:1	0.439884(0.528607:0.414179:0.376866)	NA	NA	NA	NA
	Unigene63609_All	Unigene22507_All	YN	0.00494831	0.00959879	0.515514	0.269735	1434	419.948	1014.05	NA	9	4	5	NA	NA	0.00631021	5.40966:5.40966:1:1:1:1	0.402584(0.464215:0.359841:0.383698)	NA	NA	NA	NA
	Unigene35971_All	Unigene21170_All	YN	0.00851102	0.0165135	0.515397	0.228913	1314	368.524	945.476	NA	14	6	8	NA	NA	0.0107554	2.76795:2.76795:1:1:1:1	0.44102(0.487443:0.365297:0.47032)	NA	NA	NA	NA
	Unigene3781_All	Unigene2142_All	YN	0.0131178	0.0255033	0.514356	0.226643	933	240.459	692.541	NA	15	6	9	NA	NA	0.0163099	4.16953:4.16953:1:1:1:1	0.413183(0.5:0.38746:0.35209)	NA	NA	NA	NA
	Unigene40426_All	Unigene33619_All	YN	0.010303	0.0200677	0.513411	0.224831	1281	303.57	977.43	NA	16	6	10	NA	NA	0.012617	0.951433:0.951433:1:1:1:1	0.446651(0.469626:0.413551:0.456776)	NA	NA	NA	NA
	Unigene2003_All	Unigene33487_All	YN	0.00919084	0.0179144	0.513041	0.136719	717	169.547	547.453	NA	8	3	5	NA	NA	0.0112537	1.02172:1.02172:1:1:1:1	0.444212(0.458159:0.393305:0.481172)	NA	NA	NA	NA
	Unigene36548_All	Unigene36583_All	YN	0.00294694	0.00577041	0.510698	0.460333	1368	347.978	1020.02	NA	5	2	3	NA	NA	0.00366514	1.97089:1.97089:1:1:1:1	0.452485(0.503289:0.385965:0.468202)	NA	NA	NA	NA
	Unigene24617_All	Unigene35458_All	YN	0.00442348	0.00867645	0.509827	0.326827	1482	348.056	1133.94	NA	8	3	5	NA	NA	0.00542232	2.05026:2.05026:1:1:1:1	0.436955(0.501006:0.429577:0.380282)	NA	NA	NA	NA
	Unigene28464_All	Unigene8909_All	YN	0.00540409	0.0106089	0.509391	0.459856	747	189.857	557.143	NA	5	2	3	NA	NA	0.00672694	2.02198:2.02198:1:1:1:1	0.455128(0.530769:0.440385:0.394231)	NA	NA	NA	NA
	Unigene16429_All	Unigene24473_All	YN	0.0222526	0.0437604	0.50851	0.18724	693	189.309	503.691	NA	19	8	11	NA	NA	0.028128	7.68385:7.68385:1:1:1:1	0.390625(0.453125:0.384766:0.333984)	NA	NA	NA	NA
	Unigene36399_All	Unigene18227_All	YN	0.00601343	0.0118295	0.508342	0.337956	924	255.608	668.392	NA	7	3	4	NA	NA	0.00762235	5.37808:5.37808:1:1:1:1	0.462121(0.470779:0.532468:0.383117)	NA	NA	NA	NA
	Unigene9727_All	Unigene16075_All	YN	0.0111852	0.0220034	0.508338	0.225159	999	277.898	721.102	NA	14	6	8	NA	NA	0.0141945	4.00648:4.00648:1:1:1:1	0.452452(0.528529:0.438438:0.39039)	NA	NA	NA	NA
	Unigene9969_All	Unigene11582_All	YN	0.00240705	0.00473727	0.50811	0.196288	2088	423.519	1664.48	NA	6	2	4	NA	NA	0.0028797	0.658984:0.658984:1:1:1:1	0.399738(0.454784:0.366317:0.378113)	NA	NA	NA	NA
	Unigene9679_All	Unigene34921_All	YN	0.0105678	0.0208105	0.507813	0.106001	1824	488.311	1335.69	NA	24	10	14	NA	NA	0.01331	5.88516:5.88516:1:1:1:1	0.463328(0.57225:0.435961:0.381773)	NA	NA	NA	NA
	Unigene9255_All	Unigene20230_All	YN	0.0142109	0.0280743	0.50619	0.221406	858	217.89	640.11	NA	15	6	9	NA	NA	0.0177315	4.5124:4.5124:1:1:1:1	0.404057(0.526316:0.358553:0.327303)	NA	NA	NA	NA
	Unigene14967_All	Unigene16145_All	YN	0.0051751	0.0102546	0.504658	0.444201	972	196.37	775.63	NA	6	2	4	NA	NA	0.0062013	0.66704:0.66704:1:1:1:1	0.437757(0.513889:0.42284:0.376543)	NA	NA	NA	NA
	Unigene7735_All	Unigene24076_All	YN	0.00934675	0.0185366	0.504232	0.305744	921	273.916	647.084	NA	11	5	6	NA	NA	0.0120799	9.58855:9.58855:1:1:1:1	0.400651(0.477199:0.350163:0.374593)	NA	NA	NA	NA
	Unigene5926_All	Unigene19743_All	YN	0.0119319	0.023697	0.503518	0.210734	942	250.598	691.402	NA	14	5.81568	8.18432	NA	NA	0.0150617	2.98044:2.98044:1:1:1:1	0.438429(0.565287:0.36465:0.38535)	NA	NA	NA	NA
	Unigene20798_All	Unigene35558_All	YN	0.00719738	0.014302	0.503241	0.334858	771	212.042	558.958	NA	7	3	4	NA	NA	0.00915132	5.15311:5.15311:1:1:1:1	0.47406(0.529183:0.523346:0.36965)	NA	NA	NA	NA
	Unigene5824_All	Unigene59103_All	YN	0.00969127	0.0193062	0.501977	0.21997	1458	315.362	1142.64	NA	17	6	11	NA	NA	0.011771	2.35372:2.35372:1:1:1:1	0.43107(0.526749:0.4393:0.32716)	NA	NA	NA	NA
	Unigene5485_All	Unigene6998_All	YN	0.00926973	0.018468	0.501934	0.190822	1143	274.461	868.539	NA	13	5	8	NA	NA	0.0114785	2.40211:2.40211:1:1:1:1	0.423885(0.496063:0.418635:0.356955)	NA	NA	NA	NA
	Unigene6809_All	Unigene8822_All	YN	0.011914	0.0237512	0.501616	0.219676	1188	257.21	930.79	NA	17	6	11	NA	NA	0.0144768	1.94945:1.94945:1:1:1:1	0.424013(0.52267:0.38539:0.36398)	NA	NA	NA	NA
	Unigene20936_All	Unigene59653_All	YN	0.00418426	0.00834414	0.50146	0.455209	960	241.025	718.975	NA	5	2	3	NA	NA	0.00522867	2:2:1:1:1:1	0.476563(0.575:0.398438:0.45625)	NA	NA	NA	NA
	Unigene9393_All	Unigene33988_All	YN	0.00866883	0.0173436	0.49983	0.189696	1221	292.517	928.483	NA	13	5	8	NA	NA	0.0107471	3.19426:3.19426:1:1:1:1	0.445924(0.535109:0.422518:0.380145)	NA	NA	NA	NA
	Unigene4959_All	Unigene13445_All	YN	0.00864099	0.0172886	0.499808	0.245325	933	234.043	698.957	NA	10	4	6	NA	NA	0.0108102	3.0829:3.0829:1:1:1:1	0.450561(0.547401:0.394495:0.409786)	NA	NA	NA	NA
	Unigene6392_All	Unigene21375_All	YN	0.00681078	0.0136392	0.499352	0.319895	960	222.233	737.767	NA	8	3	5	NA	NA	0.00839152	1.84541:1.84541:1:1:1:1	0.430729(0.464062:0.40625:0.421875)	NA	NA	NA	NA
	Unigene25256_All	Unigene20482_All	YN	0.0112909	0.0226204	0.499144	0.221715	894	269.267	624.733	NA	13	6	7	NA	NA	0.0147032	5.84639:5.84639:1:1:1:1	0.462541(0.539088:0.372964:0.47557)	NA	NA	NA	NA
	Unigene36471_All	Unigene24905_All	YN	0.0071921	0.0144502	0.497717	0.318104	909	209.616	699.384	NA	8	3	5	NA	NA	0.00886582	2:2:1:1:1:1	0.39602(0.426866:0.352239:0.408955)	NA	NA	NA	NA
	Unigene29825_All	Unigene8917_All	YN	0.00384989	0.00774717	0.496941	0.452505	1041	259.494	781.506	NA	5	2	3	NA	NA	0.00482138	3.82393:3.82393:1:1:1:1	0.412584(0.520173:0.351585:0.365994)	NA	NA	NA	NA
	Unigene62842_All	Unigene17341_All	YN	0.00278559	0.0056551	0.492579	0.669213	897	177.499	719.501	NA	3	1	2	NA	NA	0.00335341	2:2:1:1:1:1	0.411929(0.463211:0.41806:0.354515)	NA	NA	NA	NA
	Unigene26321_All	Unigene38029_All	YN	0.019094	0.0387644	0.492566	0.0396733	1596	425.813	1170.19	NA	38	16	22	NA	NA	0.0243421	7.71691:7.71691:1:1:1:1	0.433757(0.518149:0.441924:0.341198)	NA	NA	NA	NA
	Unigene41326_All	Unigene26196_All	YN	0.00353357	0.00717723	0.49233	0.449935	1131	279.994	851.006	NA	5	2	3	NA	NA	0.00443561	1.00035:1.00035:1:1:1:1	0.452697(0.484085:0.419098:0.454907)	NA	NA	NA	NA
	Unigene24221_All	Unigene33049_All	YN	0.0148506	0.0301707	0.492218	0.185303	714	169.928	544.072	NA	13	5	8	NA	NA	0.0184967	1.50329:1.50329:1:1:1:1	0.472656(0.492188:0.447266:0.478516)	NA	NA	NA	NA
	Unigene19545_All	Unigene5211_All	YN	0.00499598	0.0101621	0.491626	0.182481	2103	496.271	1606.73	NA	13	5	8	NA	NA	0.0062151	1.97787:1.97787:1:1:1:1	0.392519(0.488636:0.317472:0.371449)	NA	NA	NA	NA
	Unigene27814_All	Unigene5833_All	YN	0.00382013	0.00778798	0.490516	0.668736	654	129.071	524.929	NA	3	1	2	NA	NA	0.00460321	1.91326:1.91326:1:1:1:1	0.436544(0.490826:0.426606:0.392202)	NA	NA	NA	NA
	Unigene36418_All	Unigene11688_All	YN	0.00543528	0.0110959	0.489848	0.24928	1287	363.702	923.298	NA	9	4	5	NA	NA	0.00703494	3.54493:3.54493:1:1:1:1	0.464744(0.516026:0.394231:0.483974)	NA	NA	NA	NA
	Unigene42846_All	Unigene14793_All	YN	0.00480541	0.00984703	0.488006	0.447512	831	204.443	626.557	NA	5	2	3	NA	NA	0.00604576	2:2:1:1:1:1	0.409586(0.482026:0.343137:0.403595)	NA	NA	NA	NA
	Unigene5154_All	Unigene66768_All	YN	0.0105917	0.0217222	0.487596	0.161769	1089	327.268	761.732	NA	15	7	8	NA	NA	0.0139367	9.46819:9.46819:1:1:1:1	0.437557(0.50551:0.404959:0.402204)	NA	NA	NA	NA
	Unigene35295_All	Unigene67124_All	YN	0.00992161	0.0203591	0.487331	0.312305	657	149.662	507.338	NA	8	3	5	NA	NA	0.0122992	1.9718:1.9718:1:1:1:1	0.392285(0.484716:0.316594:0.375546)	NA	NA	NA	NA
	Unigene42537_All	Unigene14422_All	YN	0.00788307	0.0162033	0.486511	0.247098	888	250.115	637.885	NA	9	4	5	NA	NA	0.0102266	5.13183:5.13183:1:1:1:1	0.449887(0.508446:0.459459:0.381757)	NA	NA	NA	NA
	Unigene30010_All	Unigene20008_All	YN	0.0063213	0.0130297	0.485144	0.213818	1737	465.035	1271.96	NA	14	6	8	NA	NA	0.0081173	5.60704:5.60704:1:1:1:1	0.398724(0.489633:0.351675:0.354864)	NA	NA	NA	NA
	Unigene36812_All	Unigene4572_All	YN	0.00635083	0.0131049	0.484617	0.321024	864	230.929	633.071	NA	7	3	4	NA	NA	0.00815603	5.03239:5.03239:1:1:1:1	0.475694(0.576389:0.477431:0.373264)	NA	NA	NA	NA
	Unigene42210_All	Unigene36051_All	YN	0.00472635	0.00977472	0.483528	0.444927	843	205.946	637.054	NA	5	2	3	NA	NA	0.00595967	2:2:1:1:1:1	0.454923(0.514235:0.409253:0.441281)	NA	NA	NA	NA
	Unigene7475_All	Unigene6792_All	YN	0.0144683	0.0299318	0.483375	0.298517	660	171.32	488.68	NA	12	5	7	NA	NA	0.0184823	3.3588:3.3588:1:1:1:1	0.460606(0.563636:0.425:0.393182)	NA	NA	NA	NA
	Unigene20895_All	Unigene1342_All	YN	0.00959205	0.0198965	0.482097	0.297023	885	254.937	630.063	NA	11	5	6	NA	NA	0.0125604	6.27423:6.27423:1:1:1:1	0.462147(0.533898:0.4:0.452542)	NA	NA	NA	NA
	Unigene27595_All	Unigene28051_All	YN	0.00944727	0.0196233	0.481431	0.0987944	1191	283.749	907.251	NA	14	5.48398	8.51602	NA	NA	0.0118717	1.79474:1.79474:1:1:1:1	0.447523(0.544081:0.40932:0.389169)	NA	NA	NA	NA
	Unigene19332_All	Unigene26017_All	YN	0.00507372	0.0105434	0.481223	0.241975	1371	382.172	988.828	NA	9	4	5	NA	NA	0.00659841	1.85842:1.85842:1:1:1:1	0.456236(0.506565:0.407002:0.455142)	NA	NA	NA	NA
	Unigene40871_All	Unigene19789_All	YN	0.0137478	0.0286001	0.480692	0.183475	693	179.073	513.927	NA	12	5	7	NA	NA	0.0175857	3.15541:3.15541:1:1:1:1	0.423928(0.56639:0.323651:0.381743)	NA	NA	NA	NA
	Unigene22871_All	Unigene27009_All	YN	0.00509901	0.010609	0.480632	0.241621	1365	380.247	984.753	NA	9	4	5	NA	NA	0.00663391	7.50248:7.50248:1:1:1:1	0.430037(0.456044:0.474725:0.359341)	NA	NA	NA	NA
	Unigene19212_All	Unigene16282_All	YN	0.00872134	0.0181594	0.480265	0.306641	744	167.212	576.788	NA	8	3	5	NA	NA	0.0108425	2:2:1:1:1:1	0.425403(0.475806:0.41129:0.389113)	NA	NA	NA	NA
	Unigene34777_All	Unigene8883_All	YN	0.00602827	0.0125552	0.480141	0.306264	1074	240.95	833.05	NA	8	3	5	NA	NA	0.00749258	2.92917:2.92917:1:1:1:1	0.387337(0.445531:0.410615:0.305866)	NA	NA	NA	NA
	Unigene21946_All	Unigene24847_All	YN	0.00722963	0.015059	0.480087	0.167881	1587	335.67	1251.33	NA	14	5	9	NA	NA	0.00888563	2.20281:2.20281:1:1:1:1	0.41604(0.457707:0.431391:0.359023)	NA	NA	NA	NA
	Unigene9165_All	Unigene26285_All	YN	0.00601611	0.0125549	0.479186	0.11569	2481	644.467	1836.53	NA	19	8	11	NA	NA	0.00771462	7.03924:7.03924:1:1:1:1	0.429884(0.524747:0.448819:0.316085)	NA	NA	NA	NA
	Unigene42797_All	Unigene10710_All	YN	0.0054906	0.011493	0.477736	0.296148	1536	438.681	1097.32	NA	11	5	6	NA	NA	0.00720487	6.15234:6.15234:1:1:1:1	0.429956(0.546904:0.363039:0.379925)	NA	NA	NA	NA
	Unigene3_All	Unigene525_All	YN	0.0105022	0.0219942	0.477499	0.295842	807	231.537	575.463	NA	11	5	6	NA	NA	0.0137994	5.32957:5.32957:1:1:1:1	0.45449(0.546125:0.391144:0.426199)	NA	NA	NA	NA
	Unigene1937_All	Unigene3394_All	YN	0.00371578	0.00778325	0.477407	0.441446	1068	258.378	809.622	NA	5	2	3	NA	NA	0.00469981	4.00936:4.00936:1:1:1:1	0.459738(0.588483:0.435393:0.355337)	NA	NA	NA	NA
	Unigene42827_All	Unigene31302_All	YN	0.00438054	0.00918499	0.476924	0.441314	906	219.138	686.862	NA	5	2	3	NA	NA	0.00554261	1.17931:1.17931:1:1:1:1	0.439533(0.510671:0.38872:0.419207)	NA	NA	NA	NA
	Unigene25280_All	Unigene34226_All	YN	0.00482106	0.0101837	0.473408	0.439295	822	197.728	624.272	NA	5	2	3	NA	NA	0.00611102	2:2:1:1:1:1	0.433698(0.463504:0.406934:0.430657)	NA	NA	NA	NA
	Unigene42849_All	Unigene35417_All	YN	0.00890144	0.0188195	0.472991	0.29411	948	269.327	678.673	NA	11	5	6	NA	NA	0.0117192	6.77127:6.77127:1:1:1:1	0.486814(0.564873:0.503165:0.392405)	NA	NA	NA	NA
	Unigene5314_All	Unigene8644_All	YN	0.00794279	0.0168708	0.470801	0.300729	813	180.111	632.889	NA	8	3	5	NA	NA	0.00992069	1.98096:1.98096:1:1:1:1	0.410209(0.483395:0.363469:0.383764)	NA	NA	NA	NA
	Unigene14607_All	Unigene51929_All	YN	0.00515569	0.0109578	0.470503	0.437553	768	183.855	584.145	NA	5	2	3	NA	NA	0.00654469	2:2:1:1:1:1	0.432555(0.536965:0.354086:0.406615)	NA	NA	NA	NA
	Unigene52620_All	Unigene1074_All	YN	0.00626261	0.0133178	0.470245	0.437544	633	151.571	481.429	NA	5	2	3	NA	NA	0.00795195	2.2175:2.2175:1:1:1:1	0.418519(0.462222:0.426667:0.366667)	NA	NA	NA	NA
	Unigene9038_All	Unigene4656_All	YN	0.00531499	0.0113549	0.468081	0.436436	744	177.557	566.443	NA	5	2	3	NA	NA	0.00675642	2:2:1:1:1:1	0.404762(0.449807:0.359073:0.405405)	NA	NA	NA	NA
	Unigene19490_All	Unigene1198_All	YN	0.00639569	0.0137552	0.464967	0.207561	1383	440.347	942.653	NA	12	6	6	NA	NA	0.00873894	7.82638:7.82638:1:1:1:1	0.46129(0.546237:0.387097:0.450538)	NA	NA	NA	NA
	Unigene34631_All	Unigene37181_All	YN	0.00341305	0.00734201	0.464866	0.434158	1155	273.74	881.26	NA	5	2	3	NA	NA	0.00434424	2:2:1:1:1:1	0.431347(0.528497:0.413212:0.352332)	NA	NA	NA	NA
	Unigene40378_All	Unigene20560_All	YN	0.0103261	0.02224	0.464301	0.147148	1296	320.276	975.724	NA	17	7	10	NA	NA	0.0132703	2.3509:2.3509:1:1:1:1	0.458998(0.54328:0.452164:0.381549)	NA	NA	NA	NA
	Unigene9307_All	Unigene1345_All	YN	0.00217578	0.00468627	0.464288	0.433809	1809	428.183	1380.82	NA	5	2	3	NA	NA	0.00277	2.64854:2.64854:1:1:1:1	0.422056(0.481758:0.424544:0.359867)	NA	NA	NA	NA
	Unigene6465_All	Unigene20358_All	YN	0.0107688	0.0232053	0.464064	0.205171	1011	262.582	748.418	NA	14	6	8	NA	NA	0.0139989	2.66077:2.66077:1:1:1:1	0.468416(0.523324:0.386297:0.495627)	NA	NA	NA	NA
	Unigene71379_All	Unigene19081_All	YN	0.0213095	0.0460354	0.462893	0.0810793	822	203.06	618.94	NA	22	9	13	NA	NA	0.0274175	1.82303:1.82303:1:1:1:1	0.409347(0.408784:0.364865:0.454392)	NA	NA	NA	NA
	Unigene27150_All	Unigene21627_All	YN	0.0222118	0.0479909	0.462834	0.0906374	687	161.839	525.161	NA	19	7.50802	11.492	NA	NA	0.0282847	1.08213:1.08213:1:1:1:1	0.442436(0.483936:0.459839:0.383534)	NA	NA	NA	NA
	Unigene8654_All	Unigene24576_All	YN	0.0112173	0.0242389	0.462781	0.151467	924	293.818	630.182	NA	14	7	7	NA	NA	0.015358	8.81012:8.81012:1:1:1:1	0.410455(0.451863:0.36646:0.413043)	NA	NA	NA	NA
	Unigene9847_All	Unigene21921_All	YN	0.0170302	0.0369086	0.461415	0.162963	615	139.87	475.13	NA	13	5	8	NA	NA	0.0215511	1.82493:1.82493:1:1:1:1	0.409455(0.456731:0.451923:0.319712)	NA	NA	NA	NA
	Unigene23251_All	Unigene23576_All	YN	0.00285433	0.00620365	0.460105	0.431648	1377	323.964	1053.04	NA	5	2	3	NA	NA	0.00364232	2:2:1:1:1:1	0.4329(0.495671:0.354978:0.448052)	NA	NA	NA	NA
	Unigene23306_All	Unigene70491_All	YN	0.00558824	0.0121541	0.459784	0.431465	705	165.891	539.109	NA	5	2	3	NA	NA	0.00713322	2:2:1:1:1:1	0.412821(0.482692:0.375:0.380769)	NA	NA	NA	NA
	Unigene3518_All	Unigene82817_All	YN	0.00391237	0.0085156	0.459436	0.431196	1005	236.199	768.801	NA	5	2	3	NA	NA	0.00499424	2:2:1:1:1:1	0.415675(0.511905:0.349702:0.385417)	NA	NA	NA	NA
	Unigene6482_All	Unigene24184_All	YN	0.00658009	0.0143256	0.459324	0.204264	1644	422.844	1221.16	NA	14	6	8	NA	NA	0.00857226	2.00939:2.00939:1:1:1:1	0.418266(0.490401:0.378709:0.385689)	NA	NA	NA	NA
	Unigene38311_All	Unigene24254_All	YN	0.00704459	0.0153525	0.458857	0.303216	768	197.415	570.585	NA	7	3	4	NA	NA	0.00918014	3.95362:3.95362:1:1:1:1	0.405599(0.435547:0.404297:0.376953)	NA	NA	NA	NA
	Unigene16662_All	Unigene21518_All	YN	0.00929866	0.0202666	0.458818	0.0225555	3291	801.474	2489.53	NA	39	16	23	NA	NA	0.0119697	2.70514:2.70514:1:1:1:1	0.439433(0.539029:0.400694:0.378578)	NA	NA	NA	NA
	Unigene724_All	Unigene5196_All	YN	0.00737605	0.0160873	0.458502	0.224483	933	251.417	681.583	NA	9	4	5	NA	NA	0.00972348	4.41962:4.41962:1:1:1:1	0.427445(0.5:0.397476:0.384858)	NA	NA	NA	NA
	Unigene27445_All	Unigene25441_All	YN	0.00554338	0.0120938	0.458367	0.30297	975	250.351	724.649	NA	7	3	4	NA	NA	0.00722532	2:2:1:1:1:1	0.457949(0.470769:0.432308:0.470769)	NA	NA	NA	NA
	Unigene39156_All	Unigene28974_All	YN	0.00776123	0.0169378	0.45822	0.214879	1017	239.396	777.604	NA	10	4	6	NA	NA	0.00992134	4.1283:4.1283:1:1:1:1	0.415238(0.514286:0.415714:0.315714)	NA	NA	NA	NA
	Unigene20791_All	Unigene68882_All	YN	0.00910482	0.0199213	0.457038	0.213322	867	203.468	663.532	NA	10	4	6	NA	NA	0.0116432	2:2:1:1:1:1	0.412341(0.475779:0.366782:0.394464)	NA	NA	NA	NA
	Unigene25359_All	Unigene20101_All	YN	0.00712368	0.0155934	0.45684	0.291313	900	194.694	705.306	NA	8	3	5	NA	NA	0.00895591	1.34923:1.34923:1:1:1:1	0.423841(0.468543:0.425497:0.377483)	NA	NA	NA	NA
	Unigene29346_All	Unigene33753_All	YN	0.00386049	0.00846397	0.456109	0.429199	1017	237.632	779.368	NA	5	2	3	NA	NA	0.00493614	3.75821:3.75821:1:1:1:1	0.448682(0.543785:0.470339:0.331921)	NA	NA	NA	NA
	Unigene7739_All	Unigene3008_All	YN	0.00232331	0.00509958	0.455589	0.655029	1059	196.762	862.238	NA	3	1	2	NA	NA	0.00283914	2:2:1:1:1:1	0.403153(0.474324:0.37027:0.364865)	NA	NA	NA	NA
	Unigene29866_All	Unigene33875_All	YN	0.00580289	0.012741	0.455449	0.300557	930	237.481	692.519	NA	7	3	4	NA	NA	0.00757458	4.78156:4.78156:1:1:1:1	0.418817(0.516129:0.380645:0.359677)	NA	NA	NA	NA
	Unigene40439_All	Unigene33353_All	YN	0.00647402	0.0142228	0.455187	0.212062	1215	284.02	930.98	NA	10	4	6	NA	NA	0.00828538	1.84444:1.84444:1:1:1:1	0.438956(0.544578:0.33012:0.442169)	NA	NA	NA	NA
	Unigene37283_All	Unigene25545_All	YN	0.00737985	0.0162223	0.454919	0.300954	732	187.2	544.8	NA	7	3	4	NA	NA	0.00964121	1.92312:1.92312:1:1:1:1	0.428279(0.485656:0.379098:0.420082)	NA	NA	NA	NA
	Unigene5026_All	Unigene26358_All	YN	0.00349651	0.0076983	0.454193	0.220858	1956	522.365	1433.64	NA	9	4	5	NA	NA	0.00461863	5.55866:5.55866:1:1:1:1	0.43226(0.495399:0.440184:0.361196)	NA	NA	NA	NA
	Unigene31301_All	Unigene28298_All	YN	0.00453644	0.00999221	0.453998	0.416071	1086	201.492	884.508	NA	6	2	4	NA	NA	0.00554868	0.591145:0.591145:1:1:1:1	0.42081(0.516575:0.389503:0.356354)	NA	NA	NA	NA
	Unigene9902_All	Unigene17359_All	YN	0.00709088	0.0156514	0.453052	0.141657	1056	304.248	751.752	NA	10	4.69616	5.30384	NA	NA	0.00955728	3.96757:3.96757:1:1:1:1	0.470205(0.484637:0.462291:0.463687)	NA	NA	NA	NA
	Unigene41233_All	Unigene26568_All	YN	0.00356915	0.00787811	0.453046	0.427423	1098	255.204	842.796	NA	5	2	3	NA	NA	0.00457066	2:2:1:1:1:1	0.433064(0.473046:0.41779:0.408356)	NA	NA	NA	NA
	Unigene8134_All	Unigene33576_All	YN	0.0140894	0.0310992	0.453045	0.160449	666	164.168	501.832	NA	12	5	7	NA	NA	0.0182823	1.79733:1.79733:1:1:1:1	0.418168(0.486486:0.362613:0.405405)	NA	NA	NA	NA
	Unigene23837_All	Unigene36540_All	YN	0.0115565	0.0255286	0.452686	0.160592	810	199.539	610.461	NA	12	5	7	NA	NA	0.0149984	2.11701:2.11701:1:1:1:1	0.411111(0.459259:0.401852:0.372222)	NA	NA	NA	NA
	Unigene28611_All	Unigene36390_All	YN	0.00668313	0.0147682	0.452534	0.143698	1833	480.186	1352.81	NA	16	7	9	NA	NA	0.00880117	6.23524:6.23524:1:1:1:1	0.419176(0.527734:0.406498:0.323296)	NA	NA	NA	NA
	Unigene7905_All	Unigene35477_All	YN	0.00689282	0.0152562	0.451805	0.209576	1140	264.987	875.013	NA	10	4	6	NA	NA	0.00883684	3.18135:3.18135:1:1:1:1	0.409976(0.49635:0.40146:0.332117)	NA	NA	NA	NA
	Unigene36607_All	Unigene19340_All	YN	0.00491226	0.0109018	0.450591	0.297495	1095	277.509	817.491	NA	7	3	4	NA	NA	0.00643022	2:2:1:1:1:1	0.480366(0.519634:0.374346:0.54712)	NA	NA	NA	NA
	Unigene4997_All	Unigene23176_All	YN	0.00716468	0.0159372	0.449557	0.151996	1440	318.023	1121.98	NA	13	5	8	NA	NA	0.00910209	2.13308:2.13308:1:1:1:1	0.45(0.540625:0.439583:0.369792)	NA	NA	NA	NA
	Unigene4944_All	Unigene4510_All	YN	0.0104084	0.0232632	0.44742	0.0921733	1533	332.253	1200.75	NA	20	7.59527	12.4047	NA	NA	0.0131945	2.94764:2.94764:1:1:1:1	0.388487(0.479204:0.389693:0.296564)	NA	NA	NA	NA
	Unigene2935_All	Unigene15715_All	YN	0.0092547	0.0207463	0.446089	0.0761123	1638	441.234	1196.77	NA	20	9	11	NA	NA	0.0123502	5.70177:5.70177:1:1:1:1	0.413043(0.483696:0.372283:0.383152)	NA	NA	NA	NA
	Unigene5054_All	Unigene21640_All	YN	0.00499022	0.0112054	0.445342	0.423264	783	179.822	603.178	NA	5	2	3	NA	NA	0.00641759	2:2:1:1:1:1	0.400383(0.494253:0.331418:0.375479)	NA	NA	NA	NA
	Unigene41213_All	Unigene33852_All	YN	0.00361313	0.00812064	0.444932	0.422943	1080	247.694	832.306	NA	5	2	3	NA	NA	0.00464691	2.14929:2.14929:1:1:1:1	0.424537(0.468056:0.408333:0.397222)	NA	NA	NA	NA
	Unigene35952_All	Unigene30781_All	YN	0.00745573	0.0167867	0.444145	0.293087	720	180.72	539.28	NA	7	3	4	NA	NA	0.00979781	3.75162:3.75162:1:1:1:1	0.46888(0.537344:0.425311:0.443983)	NA	NA	NA	NA
	Unigene19317_All	Unigene4252_All	YN	0.00945075	0.0213323	0.443026	0.198088	1032	285.854	746.146	NA	13	6	7	NA	NA	0.0127418	8.62226:8.62226:1:1:1:1	0.406309(0.471751:0.411017:0.336158)	NA	NA	NA	NA
	Unigene4258_All	Unigene27007_All	YN	0.0162595	0.0367106	0.44291	0.117458	813	252.05	560.95	NA	18	9	9	NA	NA	0.0225999	10.9574:10.9574:1:1:1:1	0.457721(0.488971:0.40625:0.477941)	NA	NA	NA	NA
	Unigene6721_All	Unigene19953_All	YN	0.00430287	0.00976085	0.440829	0.290821	1242	309.623	932.377	NA	7	3	4	NA	NA	0.00566351	1.99469:1.99469:1:1:1:1	0.42662(0.462529:0.368852:0.448478)	NA	NA	NA	NA
	Unigene19285_All	Unigene36508_All	YN	0.00661329	0.0150219	0.440242	0.211453	1029	269.53	759.47	NA	9	4	5	NA	NA	0.00881581	4.61651:4.61651:1:1:1:1	0.434659(0.545455:0.401989:0.356534)	NA	NA	NA	NA
	Unigene1418_All	Unigene11847_All	YN	0.00298021	0.00678083	0.439505	0.419759	1305	296.358	1008.64	NA	5	2	3	NA	NA	0.00384331	2.55955:2.55955:1:1:1:1	0.417012(0.461618:0.48029:0.309129)	NA	NA	NA	NA
	Unigene36427_All	Unigene31492_All	YN	0.0118166	0.0268894	0.439452	0.196356	825	227.16	597.84	NA	13	6	7	NA	NA	0.0159668	8.03221:8.03221:1:1:1:1	0.447212(0.441281:0.530249:0.370107)	NA	NA	NA	NA
	Unigene2171_All	Unigene20245_All	YN	0.00726508	0.0166094	0.437407	0.098111	2010	488.142	1521.86	NA	19	8	11	NA	NA	0.00953442	3.27839:3.27839:1:1:1:1	0.418033(0.492548:0.40462:0.35693)	NA	NA	NA	NA
	Unigene35117_All	Unigene38499_All	YN	0.00889401	0.0204093	0.435783	0.0579195	927	248.379	678.621	NA	11	5	6	NA	NA	0.0119794	1.06325:1.06325:1:1:1:1	0.508091(0.537217:0.480583:0.506472)	NA	NA	NA	NA
	Unigene32730_All	Unigene56812_All	YN	0.00515321	0.0118374	0.435333	0.166858	1401	426.568	974.432	NA	10	5	5	NA	NA	0.00718837	9.04389:9.04389:1:1:1:1	0.427195(0.480728:0.381156:0.4197)	NA	NA	NA	NA
	Unigene785_All	Unigene17179_All	YN	0.0181739	0.041926	0.433475	0.096343	921	196.956	724.044	NA	21	8	13	NA	NA	0.0232533	1.44532:1.44532:1:1:1:1	0.42316(0.512987:0.435065:0.321429)	NA	NA	NA	NA
	Unigene63686_All	Unigene23464_All	YN	0.00475819	0.0109788	0.433397	0.416415	816	183.505	632.495	NA	5	2	3	NA	NA	0.00615711	2:2:1:1:1:1	0.435662(0.485294:0.384191:0.4375)	NA	NA	NA	NA
	Unigene32815_All	Unigene63611_All	YN	0.0115519	0.0267348	0.432092	0.118303	840	229.053	610.947	NA	13	6	7	NA	NA	0.015692	2.38228:2.38228:1:1:1:1	0.468085(0.437943:0.473404:0.492908)	NA	NA	NA	NA
	Unigene42390_All	Unigene7849_All	YN	0.00702883	0.0162768	0.431833	0.40421	696	124.213	571.787	NA	6	2	4	NA	NA	0.00867928	0.649579:0.649579:1:1:1:1	0.419492(0.476695:0.381356:0.400424)	NA	NA	NA	NA
	Unigene2689_All	Unigene2545_All	YN	0.00543976	0.012606	0.431521	0.415306	714	160.047	553.953	NA	5	2	3	NA	NA	0.00704612	2.16861:2.16861:1:1:1:1	0.439076(0.510504:0.468487:0.338235)	NA	NA	NA	NA
	Unigene25186_All	Unigene18879_All	YN	0.00382224	0.00886061	0.431374	0.301095	1128	340.855	787.145	NA	6	3	3	NA	NA	0.00534472	4.33742:4.33742:1:1:1:1	0.469775(0.547927:0.431347:0.430052)	NA	NA	NA	NA
	Unigene20903_All	Unigene33586_All	YN	0.00834601	0.0193937	0.430346	0.189438	1053	209.516	843.484	NA	11	4	7	NA	NA	0.0105442	1.57623:1.57623:1:1:1:1	0.419753(0.549858:0.358974:0.350427)	NA	NA	NA	NA
	Unigene37834_All	Unigene28820_All	YN	0.00765474	0.0178129	0.429731	0.216654	753	227.234	525.766	NA	8	4	4	NA	NA	0.0107202	5.89392:5.89392:1:1:1:1	0.427367(0.496109:0.348249:0.437743)	NA	NA	NA	NA
	Unigene17194_All	Unigene17023_All	YN	0.00647117	0.0150605	0.429678	0.283242	822	201.203	620.797	NA	7	3	4	NA	NA	0.0085736	2:2:1:1:1:1	0.443847(0.519713:0.415771:0.396057)	NA	NA	NA	NA
	Unigene20092_All	Unigene20923_All	YN	0.0137708	0.0321611	0.428181	0.0242564	1200	320.144	879.856	NA	22	10	12	NA	NA	0.0186771	6.06348:6.06348:1:1:1:1	0.415(0.5375:0.375:0.3325)	NA	NA	NA	NA
	Unigene26661_All	Unigene32950_All	YN	0.00330351	0.00773889	0.426872	0.412598	1170	259.848	910.152	NA	5	2	3	NA	NA	0.00428858	1.80694:1.80694:1:1:1:1	0.446581(0.488462:0.437179:0.414103)	NA	NA	NA	NA
	Unigene28618_All	Unigene38430_All	YN	0.00966641	0.0226621	0.426544	0.149264	849	224.141	624.859	NA	11	5	6	NA	NA	0.0130973	1.7315:1.7315:1:1:1:1	0.469032(0.493243:0.459459:0.454392)	NA	NA	NA	NA
	Unigene36528_All	Unigene39322_All	YN	0.00675368	0.0158419	0.426317	0.0786441	1935	447.384	1487.62	NA	17	7	10	NA	NA	0.00885494	4.63425:4.63425:1:1:1:1	0.407494(0.503101:0.382171:0.337209)	NA	NA	NA	NA
	Unigene41970_All	Unigene21571_All	YN	0.0190982	0.0449054	0.4253	0.0751696	744	160.597	583.403	NA	18	7	11	NA	NA	0.0246688	1.54863:1.54863:1:1:1:1	0.429435(0.491935:0.385081:0.41129)	NA	NA	NA	NA
	Unigene40450_All	Unigene39402_All	YN	0.00290808	0.0068639	0.423677	0.29526	1473	439.136	1033.86	NA	6	3	3	NA	NA	0.0040874	4.00987:4.00987:1:1:1:1	0.470129(0.480652:0.473523:0.456212)	NA	NA	NA	NA
	Unigene6724_All	Unigene6463_All	YN	0.00929288	0.0219641	0.423094	0.104473	912	209.989	702.011	NA	11	4.52072	6.47928	NA	NA	0.0122104	3.6146:3.6146:1:1:1:1	0.411732(0.481908:0.414474:0.338816)	NA	NA	NA	NA
	Unigene7247_All	Unigene37641_All	YN	0.0150249	0.0355629	0.422487	0.120548	693	187.787	505.213	NA	14	6.48522	7.51478	NA	NA	0.0205902	2.90579:2.90579:1:1:1:1	0.409091(0.444215:0.415289:0.367769)	NA	NA	NA	NA
	Unigene9761_All	Unigene13584_All	YN	0.00615643	0.0145895	0.421976	0.191036	1395	415.267	979.733	NA	12	6	6	NA	NA	0.00866682	10.0848:10.0848:1:1:1:1	0.455193(0.50611:0.452138:0.407332)	NA	NA	NA	NA
	Unigene28667_All	Unigene70770_All	YN	0.0110958	0.0263048	0.421817	0.0503881	1128	310.104	817.896	NA	17	8	9	NA	NA	0.015277	10.684:10.684:1:1:1:1	0.445887(0.501299:0.480519:0.355844)	NA	NA	NA	NA
	Unigene71176_All	Unigene24226_All	YN	0.00593495	0.0140985	0.420962	0.409314	651	143.196	507.804	NA	5	2	3	NA	NA	0.00773064	2:2:1:1:1:1	0.384793(0.414747:0.343318:0.396313)	NA	NA	NA	NA
	Unigene9991_All	Unigene8073_All	YN	0.004449	0.0105767	0.420642	0.409026	867	190.432	676.568	NA	5	2	3	NA	NA	0.00579491	1.90603:1.90603:1:1:1:1	0.422145(0.444637:0.418685:0.403114)	NA	NA	NA	NA
	Unigene2589_All	Unigene62008_All	YN	0.00441631	0.0105003	0.420591	0.194894	1485	576.023	908.977	NA	10	6	4	NA	NA	0.00677624	6.63363:6.63363:1:1:1:1	0.470272(0.570209:0.411765:0.428843)	NA	NA	NA	NA
	Unigene9259_All	Unigene25601_All	YN	0.0087707	0.0208751	0.420151	0.10889	1095	291.442	803.558	NA	13	6	7	NA	NA	0.0119924	10.0862:10.0862:1:1:1:1	0.40617(0.505141:0.377892:0.335476)	NA	NA	NA	NA
	Unigene14358_All	Unigene8744_All	YN	0.00393951	0.00939263	0.419426	0.408609	978	214.483	763.517	NA	5	2	3	NA	NA	0.00513542	2:2:1:1:1:1	0.431548(0.616071:0.415179:0.263393)	NA	NA	NA	NA
	Unigene26915_All	Unigene23840_All	YN	0.00736701	0.0175737	0.419207	0.209339	777	230.838	546.162	NA	8	4	4	NA	NA	0.0103993	5.24359:5.24359:1:1:1:1	0.43758(0.492278:0.349421:0.471042)	NA	NA	NA	NA
	Unigene38112_All	Unigene33880_All	YN	0.00918691	0.0219527	0.418486	0.132467	1092	325.028	766.972	NA	14	7	7	NA	NA	0.0129866	7.65942:7.65942:1:1:1:1	0.437271(0.486264:0.399725:0.425824)	NA	NA	NA	NA
	Unigene711_All	Unigene17167_All	YN	0.0080457	0.0192659	0.417613	0.107766	1191	315.973	875.027	NA	13	6	7	NA	NA	0.0110224	3.97245:3.97245:1:1:1:1	0.458853(0.503741:0.432668:0.44015)	NA	NA	NA	NA
	Unigene39773_All	Unigene22712_All	YN	0.0111928	0.0268124	0.417447	0.033649	1704	531.935	1172.07	NA	27	14	13	NA	NA	0.0160687	9.1049:9.1049:1:1:1:1	0.386444(0.431338:0.324824:0.403169)	NA	NA	NA	NA
	Unigene22400_All	Unigene70980_All	YN	0.0047862	0.0115101	0.415824	0.264877	1311	262.951	1048.05	NA	8	3	5	NA	NA	0.00613484	0.940357:0.940357:1:1:1:1	0.427155(0.455378:0.425629:0.400458)	NA	NA	NA	NA
	Unigene29882_All	Unigene31921_All	YN	0.00872197	0.0209917	0.415496	0.0917618	1425	386.764	1038.24	NA	17	8	9	NA	NA	0.0120521	2.86608:2.86608:1:1:1:1	0.441754(0.464211:0.462105:0.398947)	NA	NA	NA	NA
	Unigene28341_All	Unigene37071_All	YN	0.00393112	0.00946707	0.415242	0.405914	978	212.595	765.405	NA	5	2	3	NA	NA	0.00513451	2:2:1:1:1:1	0.417689(0.484663:0.386503:0.381902)	NA	NA	NA	NA
	Unigene27699_All	Unigene5502_All	YN	0.0024371	0.00587985	0.414483	0.272911	2157	512.506	1644.49	NA	7	3	4	NA	NA	0.0032551	2:2:1:1:1:1	0.438161(0.533103:0.375862:0.405517)	NA	NA	NA	NA
	Unigene9573_All	Unigene8296_All	YN	0.00335843	0.00810366	0.414433	0.272864	1566	372.207	1193.79	NA	7	3	4	NA	NA	0.00448627	2.00234:2.00234:1:1:1:1	0.421775(0.469349:0.398467:0.39751)	NA	NA	NA	NA
	Unigene36368_All	Unigene34670_All	YN	0.00486392	0.011738	0.414375	0.131011	2046	601.375	1444.62	NA	14	7	7	NA	NA	0.00688439	4.15381:4.15381:1:1:1:1	0.434983(0.551674:0.350073:0.403202)	NA	NA	NA	NA
	Unigene36186_All	Unigene33418_All	YN	0.0115774	0.0279417	0.414343	0.134003	792	182.628	609.372	NA	12	5	7	NA	NA	0.0153509	1.95486:1.95486:1:1:1:1	0.408066(0.510676:0.346975:0.366548)	NA	NA	NA	NA
	Unigene41986_All	Unigene18090_All	YN	0.00996278	0.0240572	0.41413	0.188901	861	254.621	606.379	NA	12	6	6	NA	NA	0.0141309	4.52912:4.52912:1:1:1:1	0.505807(0.520906:0.484321:0.512195)	NA	NA	NA	NA
	Unigene9161_All	Unigene2918_All	YN	0.0148005	0.0358779	0.412523	0.0949858	786	171.869	614.131	NA	15	6	9	NA	NA	0.0194093	1.20475:1.20475:1:1:1:1	0.400763(0.501908:0.322519:0.377863)	NA	NA	NA	NA
	Unigene1582_All	Unigene18595_All	YN	0.00646509	0.0156975	0.411856	0.0472466	2355	645.424	1709.58	NA	21	10	11	NA	NA	0.00899537	4.21424:4.21424:1:1:1:1	0.425729(0.529551:0.369976:0.37766)	NA	NA	NA	NA
	Unigene3931_All	Unigene19021_All	YN	0.00597198	0.0145072	0.411656	0.112098	1428	418.747	1009.25	NA	12	6	6	NA	NA	0.00847485	6.1067:6.1067:1:1:1:1	0.416158(0.460285:0.329939:0.458248)	NA	NA	NA	NA
	Unigene20928_All	Unigene22153_All	YN	0.00558823	0.0135937	0.41109	0.137912	1449	371.161	1077.84	NA	11	5	6	NA	NA	0.00763882	2.85669:2.85669:1:1:1:1	0.437198(0.534161:0.379917:0.397516)	NA	NA	NA	NA
	Unigene1511_All	Unigene22137_All	YN	0.00751015	0.0182895	0.410626	0.255822	969	166.037	802.963	NA	9	3	6	NA	NA	0.00935718	1.23116:1.23116:1:1:1:1	0.40261(0.545181:0.340361:0.322289)	NA	NA	NA	NA
	Unigene9121_All	Unigene27658_All	YN	0.0058202	0.014191	0.410133	0.201652	975	284.543	690.457	NA	8	4	4	NA	NA	0.00826314	6.30072:6.30072:1:1:1:1	0.432203(0.548023:0.387006:0.361582)	NA	NA	NA	NA
	Unigene19669_All	Unigene34163_All	YN	0.00301199	0.0073925	0.407439	0.283655	1407	408.09	998.91	NA	6	3	3	NA	NA	0.00428253	5.15841:5.15841:1:1:1:1	0.379725(0.460825:0.305155:0.373196)	NA	NA	NA	NA
	Unigene27891_All	Unigene14563_All	YN	0.00649381	0.0159536	0.407043	0.20022	873	254.013	618.987	NA	8	4	4	NA	NA	0.0092463	5.20433:5.20433:1:1:1:1	0.430599(0.509464:0.438486:0.343849)	NA	NA	NA	NA
	Unigene21730_All	Unigene26043_All	YN	0.0137123	0.0337201	0.40665	0.0953004	771	182.197	588.803	NA	14	6	8	NA	NA	0.0184404	1.29448:1.29448:1:1:1:1	0.441634(0.542802:0.396887:0.385214)	NA	NA	NA	NA
	Unigene39720_All	Unigene14286_All	YN	0.00721958	0.0178599	0.404234	0.0940658	1455	341.388	1113.61	NA	14	6	8	NA	NA	0.00971613	2.7091:2.7091:1:1:1:1	0.431683(0.529703:0.455446:0.309901)	NA	NA	NA	NA
	Unigene18887_All	Unigene15946_All	YN	0.0088939	0.0220054	0.404169	0.185491	750	184.453	565.547	NA	9	4	5	NA	NA	0.0121185	2.00027:2.00027:1:1:1:1	0.439744(0.561538:0.396154:0.361538)	NA	NA	NA	NA
	Unigene22031_All	Unigene71631_All	YN	0.00700076	0.017351	0.403479	0.281623	606	175.204	430.796	NA	6	3	3	NA	NA	0.00999318	3.83875:3.83875:1:1:1:1	0.499179(0.502463:0.55665:0.438424)	NA	NA	NA	NA
	Unigene24164_All	Unigene33722_All	YN	0.00460084	0.0114128	0.403129	0.399215	831	176.653	654.347	NA	5	2	3	NA	NA	0.00604893	1.84008:1.84008:1:1:1:1	0.419374(0.541516:0.32852:0.388087)	NA	NA	NA	NA
	Unigene5648_All	Unigene66957_All	YN	0.0129093	0.0320277	0.403066	0.0698652	927	223.582	703.418	NA	16	7	9	NA	NA	0.0175204	2.57892:2.57892:1:1:1:1	0.39899(0.443939:0.343939:0.409091)	NA	NA	NA	NA
	Unigene3774_All	Unigene21840_All	YN	0.00511559	0.0127055	0.402628	0.0316386	3426	875.233	2550.77	NA	24	11	13	NA	NA	0.00705457	4.55652:4.55652:1:1:1:1	0.454466(0.549912:0.455342:0.358144)	NA	NA	NA	NA
	Unigene31343_All	Unigene25533_All	YN	0.00622426	0.0154736	0.402252	0.184121	1068	261.299	806.701	NA	9	4	5	NA	NA	0.00848721	1.93072:1.93072:1:1:1:1	0.435393(0.488764:0.372191:0.445225)	NA	NA	NA	NA
	Unigene37939_All	Unigene15468_All	YN	0.00615756	0.0153416	0.401363	0.398542	621	131.789	489.211	NA	5	2	3	NA	NA	0.00810661	0.988906:0.988906:1:1:1:1	0.432367(0.456522:0.444444:0.396135)	NA	NA	NA	NA
	Unigene41928_All	Unigene308_All	YN	0.0117763	0.0293505	0.401229	0.0625218	1185	243.489	941.511	NA	18	7	11	NA	NA	0.0153873	1.13665:1.13665:1:1:1:1	0.447257(0.511392:0.472152:0.358228)	NA	NA	NA	NA
	Unigene22260_All	Unigene11249_All	YN	0.00412623	0.0103033	0.400477	0.0616289	3555	881.771	2673.23	NA	20	9	11	NA	NA	0.00565837	3.18499:3.18499:1:1:1:1	0.415552(0.486622:0.397157:0.362876)	NA	NA	NA	NA
	Unigene39503_All	Unigene16106_All	YN	0.00892183	0.0222873	0.400309	0.0950071	1047	207.961	839.039	NA	12	4.559	7.441	NA	NA	0.0115766	1.02577:1.02577:1:1:1:1	0.412653(0.470255:0.356941:0.410765)	NA	NA	NA	NA
	Unigene4974_All	Unigene2101_All	YN	0.0179389	0.044813	0.400305	0.0872553	693	185.019	507.981	NA	17	8	9	NA	NA	0.0251138	3.10565:3.10565:1:1:1:1	0.437229(0.558442:0.350649:0.402597)	NA	NA	NA	NA
	Unigene21442_All	Unigene18360_All	YN	0.00789963	0.0197717	0.399542	0.00701904	3420	872.143	2547.86	NA	37	17	20	NA	NA	0.0109272	5.88822:5.88822:1:1:1:1	0.443666(0.514011:0.455779:0.361208)	NA	NA	NA	NA
	Unigene2648_All	Unigene3463_All	YN	0.0196327	0.049241	0.398706	0.0110013	1059	306.362	752.638	NA	29	14.428	14.572	NA	NA	0.0281982	4.9789:4.9789:1:1:1:1	0.442455(0.502558:0.382353:0.442455)	NA	NA	NA	NA
	Unigene17097_All	Unigene25169_All	YN	0.00647397	0.0162718	0.397863	0.262414	807	186.375	620.625	NA	7	3	4	NA	NA	0.00873676	2:2:1:1:1:1	0.431134(0.484375:0.427083:0.381944)	NA	NA	NA	NA
	Unigene30323_All	Unigene37081_All	YN	0.014704	0.0370113	0.397285	0.124838	675	193.837	481.163	NA	14	7	7	NA	NA	0.0211099	4.92967:4.92967:1:1:1:1	0.441532(0.546371:0.393145:0.385081)	NA	NA	NA	NA
	Unigene25199_All	Unigene25348_All	YN	0.00824086	0.0207783	0.396608	0.168947	1050	195.805	854.195	NA	11	4	7	NA	NA	0.0105789	1.96989:1.96989:1:1:1:1	0.432456(0.523684:0.373684:0.4)	NA	NA	NA	NA
	Unigene42346_All	Unigene60951_All	YN	0.00532942	0.013446	0.396358	0.137417	1317	375.202	941.798	NA	10	5	5	NA	NA	0.00764175	6.35091:6.35091:1:1:1:1	0.415338(0.482916:0.375854:0.387244)	NA	NA	NA	NA
	Unigene42081_All	Unigene17019_All	YN	0.00586891	0.0148143	0.396166	0.179961	1128	272.685	855.315	NA	9	4	5	NA	NA	0.00803139	1.8864:1.8864:1:1:1:1	0.454506(0.570866:0.419948:0.372703)	NA	NA	NA	NA
	Unigene20766_All	Unigene38186_All	YN	0.00662082	0.0167147	0.396108	0.261584	789	181.775	607.225	NA	7	3	4	NA	NA	0.00894631	2.11096:2.11096:1:1:1:1	0.429024(0.454373:0.442966:0.389734)	NA	NA	NA	NA
	Unigene4787_All	Unigene33969_All	YN	0.00399684	0.0101015	0.395668	0.179516	1653	398.653	1254.35	NA	9	4	5	NA	NA	0.0054691	2:2:1:1:1:1	0.432547(0.529038:0.415608:0.352995)	NA	NA	NA	NA
	Unigene38331_All	Unigene7967_All	YN	0.0224231	0.0569173	0.393959	0.0029706	1593	303.096	1289.9	NA	45	16.5164	28.4836	NA	NA	0.0289862	1.41722:1.41722:1:1:1:1	0.409918(0.5:0.408663:0.321092)	NA	NA	NA	NA
	Unigene1399_All	Unigene34896_All	YN	0.00281222	0.00714342	0.39368	0.274009	1491	421.97	1069.03	NA	6	3	3	NA	NA	0.004038	4.09412:4.09412:1:1:1:1	0.427308(0.483301:0.401768:0.396857)	NA	NA	NA	NA
	Unigene41356_All	Unigene15647_All	YN	0.00231557	0.00589334	0.392913	0.624562	603	170.351	432.649	NA	2	1	1	NA	NA	0.00332631	2:2:1:1:1:1	0.503044(0.582192:0.413242:0.513699)	NA	NA	NA	NA
	Unigene3118_All	Unigene295_All	YN	0.00562731	0.0143567	0.391965	0.273778	747	211.58	535.42	NA	6	3	3	NA	NA	0.00809982	2:2:1:1:1:1	0.477602(0.470356:0.454545:0.507905)	NA	NA	NA	NA
	Unigene51589_All	Unigene49794_All	YN	0.00609354	0.0155575	0.391678	0.0981812	1380	390.208	989.792	NA	12	6	6	NA	NA	0.00876958	8.91301:8.91301:1:1:1:1	0.413978(0.511828:0.382796:0.347312)	NA	NA	NA	NA
	Unigene19450_All	Unigene8066_All	YN	0.0078913	0.020176	0.391123	0.102437	795	230.611	564.389	NA	9	4.57	4.43	NA	NA	0.0114548	4.07923:4.07923:1:1:1:1	0.432598(0.430147:0.420956:0.446691)	NA	NA	NA	NA
	Unigene7797_All	Unigene23914_All	YN	0.00706406	0.0180821	0.390666	0.176335	936	224.021	711.979	NA	9	4	5	NA	NA	0.00970112	2:2:1:1:1:1	0.424145(0.546474:0.342949:0.383013)	NA	NA	NA	NA
	Unigene9551_All	Unigene33959_All	YN	0.00651384	0.0166773	0.390582	0.0730802	1506	425.907	1080.09	NA	14	7	7	NA	NA	0.00938814	6.38242:6.38242:1:1:1:1	0.419302(0.48419:0.389328:0.384387)	NA	NA	NA	NA
	Unigene37428_All	Unigene65942_All	YN	0.00731719	0.0187526	0.390197	0.0815199	1560	323.973	1236.03	NA	15	6	9	NA	NA	0.00969203	1.16645:1.16645:1:1:1:1	0.429487(0.468269:0.448077:0.372115)	NA	NA	NA	NA
	Unigene35155_All	Unigene4919_All	YN	0.00917968	0.0235371	0.390008	0.169908	831	173.189	657.811	NA	10	4	6	NA	NA	0.0121719	1.02883:1.02883:1:1:1:1	0.458333(0.526786:0.403571:0.444643)	NA	NA	NA	NA
	Unigene28096_All	Unigene16947_All	YN	0.010969	0.028158	0.389553	0.119355	825	181.84	643.16	NA	12	5	7	NA	NA	0.0147577	2.0372:2.0372:1:1:1:1	0.408485(0.456364:0.398182:0.370909)	NA	NA	NA	NA
	Unigene24178_All	Unigene40339_All	YN	0.0071443	0.0183419	0.389507	0.271828	588	165.824	422.176	NA	6	3	3	NA	NA	0.0103022	4.32279:4.32279:1:1:1:1	0.454932(0.540816:0.372449:0.451531)	NA	NA	NA	NA
	Unigene42938_All	Unigene21366_All	YN	0.00216883	0.00557142	0.389278	0.62349	642	180.155	461.845	NA	2	1	1	NA	NA	0.00312365	2:2:1:1:1:1	0.559969(0.61215:0.523364:0.544393)	NA	NA	NA	NA
	Unigene17733_All	Unigene16308_All	YN	0.00950953	0.0245156	0.387896	0.0653345	1017	231.836	785.164	NA	13	5.58125	7.41875	NA	NA	0.0129303	1.85815:1.85815:1:1:1:1	0.430187(0.483776:0.361357:0.445428)	NA	NA	NA	NA
	Unigene13782_All	Unigene22430_All	YN	0.00742846	0.0191541	0.387826	0.185638	753	211.51	541.49	NA	8	4	4	NA	NA	0.0107221	2:2:1:1:1:1	0.490157(0.547244:0.442913:0.480315)	NA	NA	NA	NA
	Unigene12732_All	Unigene32754_All	YN	0.0015489	0.00400086	0.387143	0.622758	897	250.715	646.285	NA	2	1	1	NA	NA	0.00223424	2:2:1:1:1:1	0.477249(0.584127:0.41746:0.430159)	NA	NA	NA	NA
	Unigene36540_All	Unigene5472_All	YN	0.00867488	0.022411	0.387081	0.131011	807	226.455	580.545	NA	10	5	5	NA	NA	0.0125294	7.95527:7.95527:1:1:1:1	0.441975(0.5:0.444444:0.381481)	NA	NA	NA	NA
	Unigene4833_All	Unigene31687_All	YN	0.00432572	0.0111881	0.386635	0.269317	966	270.213	695.787	NA	6	3	3	NA	NA	0.00624529	3.76442:3.76442:1:1:1:1	0.458075(0.554348:0.352484:0.467391)	NA	NA	NA	NA
	Unigene18489_All	Unigene20502_All	YN	0.0136135	0.0352428	0.386277	0.123802	591	146.086	444.914	NA	11	5	6	NA	NA	0.0189599	1.95672:1.95672:1:1:1:1	0.422783(0.486239:0.355505:0.426606)	NA	NA	NA	NA
	Unigene72789_All	Unigene3819_All	YN	0.00423501	0.0109727	0.385961	0.121471	1881	459.087	1421.91	NA	11	5	6	NA	NA	0.00587943	7.77197:7.77197:1:1:1:1	0.416667(0.492834:0.372611:0.384554)	NA	NA	NA	NA
	Unigene40615_All	Unigene33790_All	YN	0.00750822	0.0194786	0.38546	0.0841885	1488	416.629	1071.37	NA	16	8	8	NA	NA	0.0108598	4.37158:4.37158:1:1:1:1	0.444887(0.49502:0.439243:0.400398)	NA	NA	NA	NA
	Unigene28852_All	Unigene24410_All	YN	0.00594777	0.0154602	0.384715	0.0876893	1575	393.399	1181.6	NA	13	6	7	NA	NA	0.00832376	2.23804:2.23804:1:1:1:1	0.421979(0.479964:0.424408:0.361566)	NA	NA	NA	NA
	Unigene42338_All	Unigene33559_All	YN	0.00832368	0.0216387	0.384666	0.254276	624	140.65	483.35	NA	7	3	4	NA	NA	0.0113249	1.83775:1.83775:1:1:1:1	0.429487(0.512019:0.403846:0.372596)	NA	NA	NA	NA
	Unigene20926_All	Unigene34592_All	YN	0.00568459	0.0147832	0.384531	0.268434	735	205.255	529.745	NA	6	3	3	NA	NA	0.00822545	3.41175:3.41175:1:1:1:1	0.450062(0.496255:0.406367:0.447566)	NA	NA	NA	NA
	Unigene30085_All	Unigene8352_All	YN	0.00934919	0.0243165	0.384479	0.0486214	1305	336.247	968.753	NA	17	8	9	NA	NA	0.0132057	4.9519:4.9519:1:1:1:1	0.429281(0.491972:0.432339:0.363532)	NA	NA	NA	NA
	Unigene9694_All	Unigene17263_All	YN	0.00790657	0.0205736	0.384306	0.165821	960	197.102	762.898	NA	10	4	6	NA	NA	0.0105073	1.23282:1.23282:1:1:1:1	0.423958(0.54375:0.36875:0.359375)	NA	NA	NA	NA
	Unigene1556_All	Unigene35952_All	YN	0.00831516	0.0216408	0.384235	0.0932475	1008	281.273	726.727	NA	12	6	6	NA	NA	0.0120336	9.79883:9.79883:1:1:1:1	0.445578(0.507289:0.440233:0.389213)	NA	NA	NA	NA
	Unigene36338_All	Unigene9012_All	YN	0.00420444	0.0109462	0.384102	0.0686978	2316	644.972	1671.03	NA	14	7	7	NA	NA	0.00608191	9.93047:9.93047:1:1:1:1	0.432911(0.513924:0.410759:0.374051)	NA	NA	NA	NA
	Unigene42557_All	Unigene26613_All	YN	0.011015	0.0286918	0.383908	0.0216709	1365	357.047	1007.95	NA	21	10	11	NA	NA	0.0156388	9.04623:9.04623:1:1:1:1	0.431868(0.494505:0.452747:0.348352)	NA	NA	NA	NA
	Unigene4073_All	Unigene8349_All	YN	0.0138457	0.0360834	0.383712	0.0933898	609	170.495	438.505	NA	12	6	6	NA	NA	0.0200713	6.4842:6.4842:1:1:1:1	0.468801(0.559113:0.460591:0.3867)	NA	NA	NA	NA
	Unigene21630_All	Unigene1136_All	YN	0.00605874	0.015804	0.383369	0.0839246	1839	512.19	1326.81	NA	16	8	8	NA	NA	0.00877294	4.65964:4.65964:1:1:1:1	0.442119(0.505426:0.415504:0.405426)	NA	NA	NA	NA
	Unigene37477_All	Unigene2061_All	YN	0.00440087	0.0115052	0.382513	0.182097	1263	350.875	912.125	NA	8	4	4	NA	NA	0.00637451	6.52552:6.52552:1:1:1:1	0.427425(0.485777:0.365427:0.431072)	NA	NA	NA	NA
	Unigene42637_All	Unigene1707_All	YN	0.0108605	0.0284205	0.382137	0.00538116	2433	577.627	1855.37	NA	36	16	20	NA	NA	0.0150295	3.31359:3.31359:1:1:1:1	0.41232(0.487791:0.441176:0.307991)	NA	NA	NA	NA
	Unigene22438_All	Unigene1910_All	YN	0.0117992	0.0308772	0.382133	0.0925502	711	198.346	512.654	NA	12	6	6	NA	NA	0.0171213	3.05676:3.05676:1:1:1:1	0.426471(0.518908:0.329832:0.430672)	NA	NA	NA	NA
	Unigene32511_All	Unigene9916_All	YN	0.011395	0.0298544	0.381687	0.0413113	1140	343.379	796.621	NA	19	10	9	NA	NA	0.0169552	3.50611:3.50611:1:1:1:1	0.472585(0.486945:0.402089:0.528721)	NA	NA	NA	NA
	Unigene21170_All	Unigene16330_All	YN	0.00365758	0.00959902	0.381037	0.386825	1032	209.761	822.239	NA	5	2	3	NA	NA	0.00486522	0.911584:0.911584:1:1:1:1	0.426357(0.459302:0.37936:0.440407)	NA	NA	NA	NA
	Unigene25874_All	Unigene5625_All	YN	0.00551527	0.0144763	0.380985	0.181211	1008	279.538	728.462	NA	8	4	4	NA	NA	0.00800034	6.70697:6.70697:1:1:1:1	0.48368(0.547478:0.424332:0.479228)	NA	NA	NA	NA
	Unigene29512_All	Unigene85530_All	YN	0.0134201	0.0352297	0.380931	0.0868997	702	175.616	526.384	NA	13	6	7	NA	NA	0.0188761	2.92606:2.92606:1:1:1:1	0.39886(0.455128:0.378205:0.363248)	NA	NA	NA	NA
	Unigene25620_All	Unigene22115_All	YN	0.00989907	0.0260344	0.38023	0.0673153	987	274.387	712.613	NA	14	7	7	NA	NA	0.0143847	4.35071:4.35071:1:1:1:1	0.417404(0.467552:0.386431:0.39823)	NA	NA	NA	NA
	Unigene42063_All	Unigene34793_All	YN	0.0313026	0.0824247	0.379772	0.00719273	768	202.002	565.998	NA	33	15.679	17.321	NA	NA	0.0447489	2.8076:2.8076:1:1:1:1	0.448529(0.474265:0.459559:0.411765)	NA	NA	NA	NA
	Unigene19308_All	Unigene6007_All	YN	0.01148	0.0303623	0.378099	0.039127	1305	338.597	966.403	NA	21	10	11	NA	NA	0.0163792	8.27661:8.27661:1:1:1:1	0.432531(0.547046:0.43326:0.317287)	NA	NA	NA	NA
	Unigene8191_All	Unigene33740_All	YN	0.00524821	0.0138875	0.37791	0.0897882	1584	436.601	1147.4	NA	12	6	6	NA	NA	0.00762947	5.6405:5.6405:1:1:1:1	0.4375(0.53125:0.388258:0.392992)	NA	NA	NA	NA
	Unigene47879_All	Unigene16414_All	YN	0.0115924	0.0306877	0.377753	0.0388396	1290	333.7	956.3	NA	21	10	11	NA	NA	0.016532	2.44959:2.44959:1:1:1:1	0.467816(0.495402:0.471264:0.436782)	NA	NA	NA	NA
	Unigene2078_All	Unigene59829_All	YN	0.0138861	0.0368665	0.376659	0.00324305	2220	474.617	1745.38	NA	41	17	24	NA	NA	0.0187991	1.51211:1.51211:1:1:1:1	0.427616(0.498783:0.395985:0.388078)	NA	NA	NA	NA
	Unigene24607_All	Unigene18450_All	YN	0.014447	0.0384023	0.376201	0.0386646	1038	269.105	768.895	NA	21	10	11	NA	NA	0.0206575	4.01054:4.01054:1:1:1:1	0.417344(0.501355:0.422764:0.327913)	NA	NA	NA	NA
	Unigene41207_All	Unigene18842_All	YN	0.00466903	0.0124326	0.375548	0.0476993	2370	650.727	1719.27	NA	16	8	8	NA	NA	0.00680066	7.2508:7.2508:1:1:1:1	0.447512(0.535132:0.464241:0.343162)	NA	NA	NA	NA
	Unigene19105_All	Unigene26233_All	YN	0.00205908	0.00549692	0.374588	0.399988	1338	365.175	972.825	NA	4	2	2	NA	NA	0.00299736	2:2:1:1:1:1	0.450299(0.554933:0.329596:0.466368)	NA	NA	NA	NA
	Unigene5424_All	Unigene27318_All	YN	0.00954012	0.0254716	0.37454	0.0996229	747	188.862	558.138	NA	10	4.70902	5.29098	NA	NA	0.013568	2:2:1:1:1:1	0.444233(0.492395:0.431559:0.408745)	NA	NA	NA	NA
	Unigene38659_All	Unigene27252_All	YN	0.00157668	0.00421255	0.374281	0.39982	1746	476.174	1269.83	NA	4	2	2	NA	NA	0.00229554	2.27466:2.27466:1:1:1:1	0.445304(0.488832:0.434708:0.412371)	NA	NA	NA	NA
	Unigene7826_All	Unigene39263_All	YN	0.00383881	0.0102707	0.373763	0.165801	1698	392.13	1305.87	NA	9	4	5	NA	NA	0.00532417	1.90556:1.90556:1:1:1:1	0.426384(0.525618:0.341873:0.411661)	NA	NA	NA	NA
	Unigene26711_All	Unigene25529_All	YN	0.0105667	0.0282782	0.37367	0.122498	657	180.169	476.831	NA	10	5	5	NA	NA	0.0154237	5.54002:5.54002:1:1:1:1	0.43025(0.572687:0.38326:0.334802)	NA	NA	NA	NA
	Unigene9663_All	Unigene16500_All	YN	0.00387152	0.0103609	0.373666	0.021797	2496	681.802	1814.2	NA	14	7	7	NA	NA	0.00564415	10.9416:10.9416:1:1:1:1	0.441538(0.548157:0.419738:0.356718)	NA	NA	NA	NA
	Unigene28604_All	Unigene22990_All	YN	0.00598186	0.0160096	0.373642	0.383233	630	126.468	503.532	NA	5	2	3	NA	NA	0.00799486	0.957284:0.957284:1:1:1:1	0.438889(0.514286:0.395238:0.407143)	NA	NA	NA	NA
	Unigene25809_All	Unigene5414_All	YN	0.00912158	0.0244238	0.37347	0.114444	870	208.069	661.931	NA	11	5	6	NA	NA	0.0127813	2:2:1:1:1:1	0.407471(0.439655:0.389655:0.393103)	NA	NA	NA	NA
	Unigene8455_All	Unigene22798_All	YN	0.0028637	0.0076699	0.373368	0.260194	1443	393.143	1049.86	NA	6	3	3	NA	NA	0.00417314	3.9926:3.9926:1:1:1:1	0.440402(0.513514:0.444906:0.362786)	NA	NA	NA	NA
	Unigene24539_All	Unigene21676_All	YN	0.0192901	0.0516733	0.373308	0.00224406	1539	417.486	1121.51	NA	42	20.6562	21.3438	NA	NA	0.0280747	3.98452:3.98452:1:1:1:1	0.403205(0.466346:0.358654:0.384615)	NA	NA	NA	NA
	Unigene63688_All	Unigene26738_All	YN	0.00792625	0.0212384	0.373203	0.24776	651	143.543	507.457	NA	7	3	4	NA	NA	0.0108615	1.82419:1.82419:1:1:1:1	0.425926(0.48:0.391111:0.406667)	NA	NA	NA	NA
	Unigene41519_All	Unigene32773_All	YN	0.0084446	0.022664	0.372599	0.0811946	1074	358.343	715.657	NA	14	8	6	NA	NA	0.0131889	10.617:10.617:1:1:1:1	0.43622(0.48324:0.388268:0.437151)	NA	NA	NA	NA
	Unigene3214_All	Unigene24127_All	YN	0.00747082	0.0201004	0.371674	0.0555805	1668	455.948	1212.05	NA	18	9	9	NA	NA	0.0109231	7.92456:7.92456:1:1:1:1	0.428657(0.501799:0.430755:0.353417)	NA	NA	NA	NA
	Unigene26322_All	Unigene24916_All	YN	0.00172184	0.00463407	0.37156	0.618102	798	216.46	581.54	NA	2	1	1	NA	NA	0.00251179	2:2:1:1:1:1	0.471805(0.586466:0.432331:0.396617)	NA	NA	NA	NA
	Unigene9312_All	Unigene79352_All	YN	0.0069434	0.0187588	0.370141	0.245938	741	162.242	578.758	NA	7	3	4	NA	NA	0.00953038	2:2:1:1:1:1	0.435223(0.459514:0.489879:0.356275)	NA	NA	NA	NA
	Unigene41531_All	Unigene24713_All	YN	0.00621143	0.0167981	0.36977	0.120097	1110	301.417	808.583	NA	10	5	5	NA	NA	0.0090862	5.34473:5.34473:1:1:1:1	0.420934(0.459569:0.376011:0.427224)	NA	NA	NA	NA
	Unigene18797_All	Unigene21361_All	YN	0.0170868	0.0462956	0.36908	0.0267043	840	246.394	593.606	NA	21	11	10	NA	NA	0.0256545	6.02547:6.02547:1:1:1:1	0.456747(0.553633:0.422145:0.394464)	NA	NA	NA	NA
	Unigene23501_All	Unigene27177_All	YN	0.00101732	0.00275779	0.36889	0.617067	1347	363.276	983.724	NA	2	1	1	NA	NA	0.00148671	2:2:1:1:1:1	0.487751(0.502227:0.442094:0.518931)	NA	NA	NA	NA
	Unigene4506_All	Unigene31383_All	YN	0.00214729	0.00582134	0.368866	0.617461	639	172.54	466.46	NA	2	1	1	NA	NA	0.00313934	2:2:1:1:1:1	0.454617(0.568075:0.356808:0.438967)	NA	NA	NA	NA
	Unigene18708_All	Unigene8826_All	YN	0.00453876	0.0123086	0.368747	0.257594	909	246.024	662.976	NA	6	3	3	NA	NA	0.00664169	2.06698:2.06698:1:1:1:1	0.454345(0.508251:0.410891:0.443894)	NA	NA	NA	NA
	Unigene40462_All	Unigene18096_All	YN	0.00847964	0.0230629	0.367674	0.0605769	1140	309.025	830.975	NA	14	7	7	NA	NA	0.0124328	6.93585:6.93585:1:1:1:1	0.435088(0.480263:0.451316:0.373684)	NA	NA	NA	NA
	Unigene21528_All	Unigene19573_All	YN	0.0290451	0.0790508	0.367423	0.00208018	1029	276.812	752.188	NA	42	20.6131	21.3869	NA	NA	0.0424971	4.48592:4.48592:1:1:1:1	0.42381(0.54:0.337143:0.394286)	NA	NA	NA	NA
	Unigene33216_All	Unigene36480_All	YN	0.00273644	0.00745329	0.367146	0.379016	1368	269.673	1098.33	NA	5	2	3	NA	NA	0.00366628	0.921408:0.921408:1:1:1:1	0.441886(0.544956:0.370614:0.410088)	NA	NA	NA	NA
	Unigene8162_All	Unigene7647_All	YN	0.00951549	0.0259664	0.366454	0.0708721	1188	235.7	952.3	NA	15	6	9	NA	NA	0.0127793	1.10373:1.10373:1:1:1:1	0.40549(0.474118:0.383529:0.358824)	NA	NA	NA	NA
	Unigene6033_All	Unigene30798_All	YN	0.00520406	0.0142192	0.365988	0.255735	792	213.262	578.738	NA	6	3	3	NA	NA	0.00763156	1.97305:1.97305:1:1:1:1	0.45098(0.431985:0.435662:0.485294)	NA	NA	NA	NA
	Unigene36654_All	Unigene37116_All	YN	0.00210771	0.00575943	0.365958	0.394911	1299	348.592	950.408	NA	4	2	2	NA	NA	0.00308766	2:2:1:1:1:1	0.423913(0.423913:0.443478:0.404348)	NA	NA	NA	NA
	Unigene23551_All	Unigene16427_All	YN	0.0132989	0.0363762	0.365593	0.0131802	1365	453.011	911.989	NA	28	16	12	NA	NA	0.0209577	5.91697:5.91697:1:1:1:1	0.465403(0.500998:0.506986:0.388224)	NA	NA	NA	NA
	Unigene24180_All	Unigene3903_All	YN	0.00926279	0.0253409	0.365528	0.156277	813	161.148	651.852	NA	10	4	6	NA	NA	0.0124497	1.77292:1.77292:1:1:1:1	0.448529(0.534926:0.441176:0.369485)	NA	NA	NA	NA
	Unigene1369_All	Unigene5542_All	YN	0.00429164	0.0117585	0.364983	0.394832	639	171.594	467.406	NA	4	2	2	NA	NA	0.00629674	1.84962:1.84962:1:1:1:1	0.484351(0.495305:0.507042:0.450704)	NA	NA	NA	NA
	Unigene1130_All	Unigene8944_All	YN	0.00491642	0.0134974	0.364248	0.254561	837	224.542	612.458	NA	6	3	3	NA	NA	0.00721845	4.1034:4.1034:1:1:1:1	0.428649(0.473856:0.45098:0.361111)	NA	NA	NA	NA
	Unigene32907_All	Unigene33897_All	YN	0.00699625	0.0192075	0.364245	0.10461	1269	263.751	1005.25	NA	12	5	7	NA	NA	0.00953427	1.27672:1.27672:1:1:1:1	0.426667(0.518824:0.395294:0.365882)	NA	NA	NA	NA
	Unigene27086_All	Unigene19489_All	YN	0.00657865	0.0180861	0.36374	0.109531	1197	280.737	916.263	NA	11	5	6	NA	NA	0.00927755	2.5552:2.5552:1:1:1:1	0.436825(0.549875:0.390274:0.370324)	NA	NA	NA	NA
	Unigene42218_All	Unigene15980_All	YN	0.00581246	0.0159968	0.363352	0.253781	708	189.593	518.407	NA	6	3	3	NA	NA	0.00853968	2:2:1:1:1:1	0.41596(0.45339:0.341102:0.45339)	NA	NA	NA	NA
	Unigene29859_All	Unigene3270_All	YN	0.00296904	0.00817508	0.363181	0.154207	2517	491.963	2025.04	NA	10	4	6	NA	NA	0.00398659	1.122:1.122:1:1:1:1	0.416964(0.51962:0.35434:0.376932)	NA	NA	NA	NA
	Unigene37114_All	Unigene20776_All	YN	0.00775223	0.0213496	0.363109	0.108582	1017	237.861	779.139	NA	11	5	6	NA	NA	0.0109324	2.14866:2.14866:1:1:1:1	0.442871(0.46034:0.463173:0.405099)	NA	NA	NA	NA
	Unigene8842_All	Unigene24568_All	YN	0.0155392	0.0428453	0.362681	0.000323864	2295	561.611	1733.39	NA	50	23.3618	26.6382	NA	NA	0.0222213	3.33624:3.33624:1:1:1:1	0.424242(0.52013:0.402597:0.35)	NA	NA	NA	NA
	Unigene3357_All	Unigene38247_All	YN	0.0120873	0.0333489	0.36245	0.108844	654	153.593	500.407	NA	11	5	6	NA	NA	0.0170806	1.81862:1.81862:1:1:1:1	0.470183(0.53211:0.5:0.37844)	NA	NA	NA	NA
	Unigene3948_All	Unigene45134_All	YN	0.00639092	0.0176399	0.362298	0.241304	801	172.392	628.608	NA	7	3	4	NA	NA	0.00881194	1.37114:1.37114:1:1:1:1	0.436954(0.483146:0.449438:0.378277)	NA	NA	NA	NA
	Unigene26303_All	Unigene36065_All	YN	0.00202688	0.00560765	0.361448	0.355691	1407	323.61	1083.39	NA	4	1.80746	2.19254	NA	NA	0.00285045	2:2:1:1:1:1	0.430142(0.524468:0.381915:0.384043)	NA	NA	NA	NA
	Unigene9767_All	Unigene376_All	YN	0.00333214	0.00921916	0.361436	0.25236	1230	327.413	902.587	NA	6	3	3	NA	NA	0.0048992	4.07369:4.07369:1:1:1:1	0.421951(0.464634:0.4:0.40122)	NA	NA	NA	NA
	Unigene28405_All	Unigene7591_All	YN	0.00210531	0.00582493	0.361431	0.615074	648	172.343	475.657	NA	2	1	1	NA	NA	0.00309459	2:2:1:1:1:1	0.412037(0.414352:0.337963:0.483796)	NA	NA	NA	NA
	Unigene19762_All	Unigene8604_All	YN	0.0112285	0.0310802	0.361274	0.0248585	1374	297.136	1076.86	NA	21	9	12	NA	NA	0.0155215	1.94222:1.94222:1:1:1:1	0.409534(0.474948:0.417537:0.336117)	NA	NA	NA	NA
	Unigene36441_All	Unigene17416_All	YN	0.00550867	0.0152511	0.3612	0.15855	1176	264.953	911.047	NA	9	4	5	NA	NA	0.00770363	1.89695:1.89695:1:1:1:1	0.408939(0.497494:0.379699:0.349624)	NA	NA	NA	NA
	Unigene6360_All	Unigene34413_All	YN	0.00542373	0.0150222	0.361047	0.240148	942	201.711	740.289	NA	7	3	4	NA	NA	0.00747906	3.68155:3.68155:1:1:1:1	0.407625(0.517595:0.423754:0.281525)	NA	NA	NA	NA
	Unigene40216_All	Unigene30249_All	YN	0.00419997	0.0116341	0.361005	0.392284	651	173.302	477.698	NA	4	2	2	NA	NA	0.00617901	1.99995:1.99995:1:1:1:1	0.466206(0.552995:0.359447:0.486175)	NA	NA	NA	NA
	Unigene72148_All	Unigene68973_All	YN	0.00853733	0.0236612	0.360815	0.0408951	1287	343.467	943.533	NA	16	8	8	NA	NA	0.0125735	6.82494:6.82494:1:1:1:1	0.429681(0.483683:0.441725:0.363636)	NA	NA	NA	NA
	Unigene27364_All	Unigene68603_All	YN	0.0106721	0.0296456	0.359989	0.115079	645	172.866	472.134	NA	10	5	5	NA	NA	0.0157572	3.98583:3.98583:1:1:1:1	0.506912(0.495392:0.426267:0.599078)	NA	NA	NA	NA
	Unigene5057_All	Unigene1481_All	YN	0.00347164	0.00966214	0.359303	0.113344	1965	521.128	1443.87	NA	10	5	5	NA	NA	0.00511339	4.80324:4.80324:1:1:1:1	0.432726(0.540971:0.376328:0.38088)	NA	NA	NA	NA
	Unigene6644_All	Unigene30205_All	YN	0.00113682	0.00316438	0.359254	0.614069	1197	316.685	880.315	NA	2	1	1	NA	NA	0.00167324	2:2:1:1:1:1	0.460317(0.56015:0.453634:0.367168)	NA	NA	NA	NA
	Unigene1294_All	Unigene20084_All	YN	0.00902268	0.0251672	0.35851	0.0182371	1743	404.394	1338.61	NA	22	10	12	NA	NA	0.0127684	2.5016:2.5016:1:1:1:1	0.43126(0.520458:0.428805:0.344517)	NA	NA	NA	NA
	Unigene40319_All	Unigene37741_All	YN	0.00622992	0.0174145	0.357743	0.0787952	1317	349.719	967.281	NA	12	6	6	NA	NA	0.0091999	4.16209:4.16209:1:1:1:1	0.433857(0.534753:0.363229:0.403587)	NA	NA	NA	NA
	Unigene19469_All	Unigene12863_All	YN	0.0161871	0.0453155	0.357208	4.04967e-05	3054	729.565	2324.44	NA	69	31.8168	37.1832	NA	NA	0.0231455	4.3768:4.3768:1:1:1:1	0.427536(0.543478:0.428166:0.310964)	NA	NA	NA	NA
	Unigene34180_All	Unigene24689_All	YN	0.00760223	0.0212987	0.356934	0.0300125	1218	358.341	859.659	NA	14	7.51065	6.48935	NA	NA	0.0116318	7.39266:7.39266:1:1:1:1	0.424806(0.494186:0.395349:0.384884)	NA	NA	NA	NA
	Unigene62250_All	Unigene65318_All	YN	0.00217905	0.00610685	0.356821	0.613616	624	164.418	459.582	NA	2	1	1	NA	NA	0.00321399	2:2:1:1:1:1	0.464744(0.567308:0.372596:0.454327)	NA	NA	NA	NA
	Unigene27224_All	Unigene31158_All	YN	0.000994474	0.00279244	0.35613	0.613012	1365	358.776	1006.22	NA	2	1	1	NA	NA	0.00146705	2:2:1:1:1:1	0.468132(0.498901:0.451648:0.453846)	NA	NA	NA	NA
	Unigene22587_All	Unigene21338_All	YN	0.00387799	0.0108967	0.355888	0.389305	702	184.934	517.066	NA	4	2	2	NA	NA	0.00572698	2.13568:2.13568:1:1:1:1	0.480057(0.527778:0.485043:0.42735)	NA	NA	NA	NA
	Unigene35864_All	Unigene21912_All	YN	0.00523715	0.0147238	0.355692	0.0855675	1371	412.672	958.328	NA	11	6	5	NA	NA	0.00809265	6.05707:6.05707:1:1:1:1	0.465354(0.4814:0.387309:0.527352)	NA	NA	NA	NA
	Unigene39041_All	Unigene21780_All	YN	0.00791499	0.0222555	0.355642	0.072739	1164	274.843	889.157	NA	13	6	7	NA	NA	0.0113011	2.90125:2.90125:1:1:1:1	0.410588(0.504706:0.391765:0.335294)	NA	NA	NA	NA
	Unigene36266_All	Unigene33255_All	YN	0.00679148	0.0190965	0.35564	0.164275	804	212.261	591.739	NA	8	4	4	NA	NA	0.0100401	3.46684:3.46684:1:1:1:1	0.428483(0.595149:0.341418:0.348881)	NA	NA	NA	NA
	Unigene19457_All	Unigene33883_All	YN	0.007402	0.02083	0.355352	0.0430515	1059	244.254	814.746	NA	11	5	6	NA	NA	0.0104991	2.4396:2.4396:1:1:1:1	0.427762(0.484419:0.398017:0.40085)	NA	NA	NA	NA
	Unigene15877_All	Unigene30679_All	YN	0.009212	0.0259346	0.355202	0.0167139	1785	474.067	1310.93	NA	24	12	12	NA	NA	0.0136532	4.94371:4.94371:1:1:1:1	0.407283(0.510084:0.372269:0.339496)	NA	NA	NA	NA
	Unigene7496_All	Unigene6809_All	YN	0.00725825	0.0204349	0.355189	0.0503222	1455	347.436	1107.56	NA	15	7	8	NA	NA	0.0104047	1.56419:1.56419:1:1:1:1	0.449931(0.559671:0.446502:0.343621)	NA	NA	NA	NA
	Unigene18640_All	Unigene30227_All	YN	0.00371587	0.010472	0.35484	0.388644	732	192.377	539.623	NA	4	2	2	NA	NA	0.00549143	1.83315:1.83315:1:1:1:1	0.479508(0.594262:0.444672:0.39959)	NA	NA	NA	NA
	Unigene29142_All	Unigene37935_All	YN	0.00202945	0.00572327	0.354596	0.612898	669	175.504	493.496	NA	2	1	1	NA	NA	0.00299848	2:2:1:1:1:1	0.444196(0.470982:0.502232:0.359375)	NA	NA	NA	NA
	Unigene7768_All	Unigene4106_All	YN	0.00696629	0.0196928	0.353749	0.0203577	1959	516.252	1442.75	NA	20	10	10	NA	NA	0.0103201	5.9048:5.9048:1:1:1:1	0.408714(0.512448:0.369295:0.344398)	NA	NA	NA	NA
	Unigene40108_All	Unigene28150_All	YN	0.00749555	0.021194	0.353663	0.121931	777	240.152	536.848	NA	9	5	4	NA	NA	0.0117294	6.08:6.08:1:1:1:1	0.472973(0.525097:0.496139:0.397683)	NA	NA	NA	NA
	Unigene74320_All	Unigene26989_All	YN	0.00378333	0.0107003	0.353573	0.0836026	1890	564.743	1325.26	NA	11	6	5	NA	NA	0.00585015	5.32929:5.32929:1:1:1:1	0.403431(0.530882:0.302941:0.376471)	NA	NA	NA	NA
	Unigene26352_All	Unigene70555_All	YN	0.000940386	0.00266534	0.352821	0.6119	1440	375.854	1064.15	NA	2	1	1	NA	NA	0.00139062	2:2:1:1:1:1	0.435069(0.508333:0.441667:0.355208)	NA	NA	NA	NA
	Unigene18445_All	Unigene24368_All	YN	0.00909587	0.0258022	0.352523	0.153983	711	157.845	553.155	NA	9	4	5	NA	NA	0.0128048	0.952772:0.952772:1:1:1:1	0.42827(0.512658:0.383966:0.388186)	NA	NA	NA	NA
	Unigene641_All	Unigene17116_All	YN	0.00804516	0.0228358	0.352305	0.024667	1617	491.863	1125.14	NA	20	11	9	NA	NA	0.0125442	8.54694:8.54694:1:1:1:1	0.410019(0.457328:0.3859:0.386827)	NA	NA	NA	NA
	Unigene83_All	Unigene61221_All	YN	0.00532855	0.0151294	0.352198	0.153734	1209	267.279	941.721	NA	9	4	5	NA	NA	0.00749527	1.01939:1.01939:1:1:1:1	0.459259(0.535802:0.488889:0.353086)	NA	NA	NA	NA
	Unigene33828_All	Unigene26681_All	YN	0.00758698	0.0215853	0.351489	0.0199574	1665	472.504	1192.5	NA	19	10	9	NA	NA	0.0115595	9.37095:9.37095:1:1:1:1	0.42497(0.475089:0.44573:0.354093)	NA	NA	NA	NA
	Unigene26787_All	Unigene4610_All	YN	0.00268239	0.00764653	0.350798	0.245525	1515	394.338	1120.66	NA	6	3	3	NA	NA	0.0039745	3.99784:3.99784:1:1:1:1	0.441267(0.547048:0.447417:0.329336)	NA	NA	NA	NA
	Unigene39763_All	Unigene32899_All	YN	0.00209872	0.00598454	0.35069	0.611558	645	167.765	477.235	NA	2	1	1	NA	NA	0.00310942	2:2:1:1:1:1	0.450388(0.488372:0.409302:0.453488)	NA	NA	NA	NA
	Unigene40618_All	Unigene11142_All	YN	0.00864671	0.0246941	0.350153	0.0576191	987	288.555	698.445	NA	13	7	6	NA	NA	0.0133383	4.03895:4.03895:1:1:1:1	0.511477(0.537425:0.568862:0.428144)	NA	NA	NA	NA
	Unigene41221_All	Unigene7332_All	YN	0.00533833	0.0152586	0.349857	0.234159	951	198.891	752.109	NA	7	3	4	NA	NA	0.00741305	1.61362:1.61362:1:1:1:1	0.429089(0.526398:0.369565:0.391304)	NA	NA	NA	NA
	Unigene40193_All	Unigene33627_All	YN	0.0037941	0.0108638	0.349244	0.385372	714	185.485	528.515	NA	4	2	2	NA	NA	0.00563068	1.91708:1.91708:1:1:1:1	0.470588(0.497899:0.453782:0.460084)	NA	NA	NA	NA
	Unigene16924_All	Unigene31241_All	YN	0.00134816	0.00386358	0.34894	0.61074	1002	259.495	742.505	NA	2	1	1	NA	NA	0.00199959	2:2:1:1:1:1	0.434631(0.464072:0.392216:0.447605)	NA	NA	NA	NA
	Unigene39775_All	Unigene16731_All	YN	0.00579991	0.0166216	0.348939	0.24447	702	182.496	519.504	NA	6	3	3	NA	NA	0.00861317	2:2:1:1:1:1	0.472789(0.479592:0.491837:0.446939)	NA	NA	NA	NA
	Unigene29646_All	Unigene26340_All	YN	0.00494105	0.0141616	0.348905	0.159856	1098	285.249	812.751	NA	8	4	4	NA	NA	0.00733645	3.32782:3.32782:1:1:1:1	0.453097(0.494536:0.423497:0.441257)	NA	NA	NA	NA
	Unigene18324_All	Unigene18937_All	YN	0.00900863	0.0258835	0.348045	0.0365699	1209	315.533	893.467	NA	16	8	8	NA	NA	0.0134127	3.07717:3.07717:1:1:1:1	0.43424(0.484127:0.391156:0.427438)	NA	NA	NA	NA
	Unigene5787_All	Unigene26966_All	YN	0.00352564	0.0101404	0.347683	0.0969452	2487	496.766	1990.23	NA	12	5	7	NA	NA	0.00484691	1.49998:1.49998:1:1:1:1	0.423418(0.515046:0.322338:0.43287)	NA	NA	NA	NA
	Unigene25296_All	Unigene16375_All	YN	0.00750574	0.0215906	0.34764	0.0733385	1086	282.449	803.551	NA	12	6	6	NA	NA	0.011169	2.8528:2.8528:1:1:1:1	0.444751(0.520718:0.383978:0.429558)	NA	NA	NA	NA
	Unigene12821_All	Unigene2341_All	YN	0.00777545	0.022368	0.347615	0.151163	828	181.507	646.493	NA	9	4	5	NA	NA	0.0109743	3.67145:3.67145:1:1:1:1	0.424134(0.510753:0.408602:0.353047)	NA	NA	NA	NA
	Unigene18730_All	Unigene15800_All	YN	0.0058197	0.0167468	0.347511	0.244115	699	181.504	517.496	NA	6	3	3	NA	NA	0.00865706	2.45659:2.45659:1:1:1:1	0.454604(0.511673:0.455253:0.396887)	NA	NA	NA	NA
	Unigene298_All	Unigene16792_All	YN	0.0041403	0.0119188	0.347376	0.0731724	1962	508.695	1453.3	NA	12	6	6	NA	NA	0.00615706	4.52984:4.52984:1:1:1:1	0.429812(0.485211:0.464789:0.339437)	NA	NA	NA	NA
	Unigene35185_All	Unigene16418_All	YN	0.00190195	0.00548275	0.346898	0.383743	1419	366.116	1052.88	NA	4	2	2	NA	NA	0.00282583	2:2:1:1:1:1	0.457364(0.548626:0.385835:0.437632)	NA	NA	NA	NA
	Unigene42635_All	Unigene15753_All	YN	0.00911601	0.026303	0.346577	0.028325	1233	349.011	883.989	NA	17	9	8	NA	NA	0.0139809	4.98944:4.98944:1:1:1:1	0.459951(0.501214:0.451456:0.427184)	NA	NA	NA	NA
	Unigene36391_All	Unigene16442_All	YN	0.00789553	0.022821	0.345976	0.0222377	1440	390.535	1049.47	NA	17	8.7586	8.2414	NA	NA	0.0119434	3.03062:3.03062:1:1:1:1	0.432292(0.501042:0.385417:0.410417)	NA	NA	NA	NA
	Unigene40242_All	Unigene632_All	YN	0.00472442	0.0136569	0.345937	0.158367	1146	296.131	849.869	NA	8	4	4	NA	NA	0.0070326	2:2:1:1:1:1	0.444859(0.458955:0.38806:0.487562)	NA	NA	NA	NA
	Unigene19266_All	Unigene38621_All	YN	0.00307212	0.00888064	0.345934	0.383353	879	226.604	652.396	NA	4	2	2	NA	NA	0.00456954	2:2:1:1:1:1	0.430603(0.448805:0.341297:0.501706)	NA	NA	NA	NA
	Unigene23045_All	Unigene24196_All	YN	0.00693646	0.0200905	0.345261	0.0725497	1173	303.938	869.062	NA	12	6	6	NA	NA	0.0103448	2.24106:2.24106:1:1:1:1	0.459932(0.575448:0.441176:0.363171)	NA	NA	NA	NA
	Unigene18859_All	Unigene14392_All	YN	0.00186337	0.00540529	0.344731	0.609503	723	185.672	537.328	NA	2	1	1	NA	NA	0.00277296	2:2:1:1:1:1	0.466113(0.504149:0.406639:0.487552)	NA	NA	NA	NA
	Unigene1124_All	Unigene25939_All	YN	0.0104003	0.0302154	0.344206	0.0626084	705	194.289	510.711	NA	11	5.72567	5.27433	NA	NA	0.0158611	1.66778:1.66778:1:1:1:1	0.476871(0.565306:0.512245:0.353061)	NA	NA	NA	NA
	Unigene41943_All	Unigene16323_All	YN	0.00286246	0.00831915	0.34408	0.382392	942	241.965	700.035	NA	4	2	2	NA	NA	0.00426408	2:2:1:1:1:1	0.475584(0.539809:0.41242:0.474522)	NA	NA	NA	NA
	Unigene4967_All	Unigene35752_All	YN	0.00774624	0.0225731	0.343163	0.0488913	1224	314.884	909.116	NA	14	7	7	NA	NA	0.0115606	7.88253:7.88253:1:1:1:1	0.405267(0.527123:0.350236:0.338443)	NA	NA	NA	NA
	Unigene42035_All	Unigene7802_All	YN	0.00538614	0.0156982	0.343106	0.114742	1068	322.683	745.317	NA	9	5	4	NA	NA	0.00850179	9.23423:9.23423:1:1:1:1	0.415989(0.51355:0.327913:0.406504)	NA	NA	NA	NA
	Unigene35990_All	Unigene15592_All	YN	0.0075223	0.0219301	0.343013	0.0381355	1308	371.307	936.693	NA	15	8	7	NA	NA	0.0116123	5.60899:5.60899:1:1:1:1	0.432722(0.481651:0.428899:0.387615)	NA	NA	NA	NA
	Unigene19294_All	Unigene16298_All	YN	0.00350998	0.0102385	0.342821	0.381482	768	196.678	571.322	NA	4	2	2	NA	NA	0.00523309	2:2:1:1:1:1	0.483073(0.578125:0.40625:0.464844)	NA	NA	NA	NA
	Unigene7555_All	Unigene32022_All	YN	0.00201994	0.00589919	0.342409	0.608743	666	170.182	495.818	NA	2	1	1	NA	NA	0.0030112	2:2:1:1:1:1	0.460961(0.59009:0.423423:0.369369)	NA	NA	NA	NA
	Unigene13342_All	Unigene26788_All	YN	0.00224192	0.00655228	0.342159	0.60875	600	153.286	446.714	NA	2	1	1	NA	NA	0.00334312	2:2:1:1:1:1	0.465(0.5525:0.3875:0.455)	NA	NA	NA	NA
	Unigene38868_All	Unigene19690_All	YN	0.0098662	0.0288459	0.342031	0.0945033	891	176.749	714.251	NA	12	5	7	NA	NA	0.0136312	1.9156:1.9156:1:1:1:1	0.404167(0.440625:0.390625:0.38125)	NA	NA	NA	NA
	Unigene38599_All	Unigene68077_All	YN	0.00101058	0.0029582	0.34162	0.608149	1329	338.711	990.289	NA	2	1	1	NA	NA	0.00150695	2:2:1:1:1:1	0.48909(0.536117:0.462754:0.468397)	NA	NA	NA	NA
	Unigene4092_All	Unigene26983_All	YN	0.0113275	0.0331735	0.341463	0.0112206	1407	338.978	1068.02	NA	23	11	12	NA	NA	0.0165907	3.37473:3.37473:1:1:1:1	0.399443(0.458246:0.361169:0.378914)	NA	NA	NA	NA
	Unigene35962_All	Unigene38223_All	YN	0.00222948	0.00653429	0.341198	0.608487	603	153.799	449.201	NA	2	1	1	NA	NA	0.00332745	2:2:1:1:1:1	0.461028(0.517413:0.410448:0.455224)	NA	NA	NA	NA
	Unigene21956_All	Unigene39754_All	YN	0.00274169	0.00803889	0.341053	0.380478	981	250.188	730.812	NA	4	2	2	NA	NA	0.00409265	2.34006:2.34006:1:1:1:1	0.437309(0.510703:0.428135:0.373089)	NA	NA	NA	NA
	Unigene3195_All	Unigene26420_All	YN	0.00682495	0.0200148	0.340995	0.155787	792	203.12	588.88	NA	8	4	4	NA	NA	0.0102077	3.78646:3.78646:1:1:1:1	0.495597(0.45283:0.39434:0.639623)	NA	NA	NA	NA
	Unigene358_All	Unigene20330_All	YN	0.00882119	0.0258855	0.340777	0.0225788	1575	433.659	1141.34	NA	21	11	10	NA	NA	0.0135197	10.3977:10.3977:1:1:1:1	0.420952(0.511429:0.4:0.351429)	NA	NA	NA	NA
	Unigene11127_All	Unigene46773_All	YN	0.00772555	0.0226884	0.340507	0.0770578	921	269.628	651.372	NA	11	6	5	NA	NA	0.012106	6.9102:6.9102:1:1:1:1	0.421105(0.485207:0.383136:0.39497)	NA	NA	NA	NA
	Unigene3968_All	Unigene21975_All	YN	0.00196266	0.00578345	0.339357	0.607777	684	173.729	510.271	NA	2	1	1	NA	NA	0.0029331	2:2:1:1:1:1	0.434211(0.475877:0.403509:0.423246)	NA	NA	NA	NA
	Unigene23043_All	Unigene25423_All	YN	0.00611532	0.0180486	0.338824	0.0693145	1323	337.721	985.279	NA	12	6	6	NA	NA	0.00916153	4.06187:4.06187:1:1:1:1	0.423363(0.457589:0.405134:0.407366)	NA	NA	NA	NA
	Unigene42719_All	Unigene39649_All	YN	0.00750231	0.0221739	0.338339	0.154111	720	183.626	536.374	NA	8	4	4	NA	NA	0.0112441	2.19309:2.19309:1:1:1:1	0.455688(0.553571:0.390873:0.422619)	NA	NA	NA	NA
	Unigene1708_All	Unigene61243_All	YN	0.00427711	0.0126483	0.338158	0.111322	1338	399.555	938.445	NA	9	5	4	NA	NA	0.00677692	8.53492:8.53492:1:1:1:1	0.425(0.506522:0.306522:0.461957)	NA	NA	NA	NA
	Unigene32801_All	Unigene32490_All	YN	0.00335266	0.00991496	0.338142	0.378874	801	203.125	597.875	NA	4	2	2	NA	NA	0.00501679	2:2:1:1:1:1	0.429463(0.47191:0.441948:0.374532)	NA	NA	NA	NA
	Unigene25930_All	Unigene20909_All	YN	0.00403458	0.0119356	0.338029	0.378871	666	168.951	497.049	NA	4	2	2	NA	NA	0.00603891	2.04636:2.04636:1:1:1:1	0.508258(0.481982:0.441441:0.601351)	NA	NA	NA	NA
	Unigene9796_All	Unigene8784_All	YN	0.00135243	0.00401562	0.336791	0.606651	990	249.837	740.163	NA	2	1	1	NA	NA	0.00202451	2:2:1:1:1:1	0.425758(0.474242:0.409091:0.393939)	NA	NA	NA	NA
	Unigene36754_All	Unigene36109_All	YN	0.00357746	0.0106258	0.336677	0.37803	750	189.609	560.391	NA	4	2	2	NA	NA	0.00535936	2:2:1:1:1:1	0.467333(0.548:0.424:0.43)	NA	NA	NA	NA
	Unigene7079_All	Unigene8174_All	YN	0.00299355	0.00889714	0.336462	0.102359	1344	339.454	1004.55	NA	6	3	3	NA	NA	0.00448462	5.32944:5.32944:1:1:1:1	0.406622(0.486607:0.388393:0.344866)	NA	NA	NA	NA
	Unigene1709_All	Unigene9164_All	YN	0.00152262	0.00452683	0.336355	0.606501	879	221.572	657.428	NA	2	1	1	NA	NA	0.0022799	2:2:1:1:1:1	0.466439(0.552901:0.435154:0.411263)	NA	NA	NA	NA
	Unigene5268_All	Unigene37583_All	YN	0.00436406	0.0129837	0.336119	0.37774	615	155.377	459.623	NA	4	2	2	NA	NA	0.00654177	2:2:1:1:1:1	0.460163(0.553659:0.460976:0.365854)	NA	NA	NA	NA
	Unigene9421_All	Unigene25762_All	YN	0.00843291	0.025101	0.335959	0.145901	759	162.672	596.328	NA	9	4	5	NA	NA	0.0120053	0.863214:0.863214:1:1:1:1	0.452381(0.525:0.469643:0.3625)	NA	NA	NA	NA
	Unigene27434_All	Unigene33996_All	YN	0.00567264	0.016885	0.335957	0.0354237	1719	480.274	1238.73	NA	15	8	7	NA	NA	0.00880529	3.0806:3.0806:1:1:1:1	0.43379(0.444349:0.40839:0.44863)	NA	NA	NA	NA
	Unigene60288_All	Unigene16554_All	YN	0.00732316	0.021798	0.335956	0.0743448	966	279.837	686.163	NA	11	6	5	NA	NA	0.0115163	3.5367:3.5367:1:1:1:1	0.511905(0.572981:0.534161:0.428571)	NA	NA	NA	NA
	Unigene25141_All	Unigene5205_All	YN	0.00625258	0.0186119	0.335945	0.236566	645	163.195	481.805	NA	6	3	3	NA	NA	0.00937969	2:2:1:1:1:1	0.493023(0.576744:0.467442:0.434884)	NA	NA	NA	NA
	Unigene23175_All	Unigene34402_All	YN	0.00459952	0.0136987	0.335764	0.152123	1167	294.674	872.326	NA	8	4	4	NA	NA	0.0068971	2:2:1:1:1:1	0.427296(0.477041:0.399235:0.405612)	NA	NA	NA	NA
	Unigene28608_All	Unigene24907_All	YN	0.00744764	0.0221901	0.335628	0.152328	723	183.155	539.845	NA	8	4	4	NA	NA	0.0111823	2.00635:2.00635:1:1:1:1	0.488243(0.470954:0.473029:0.520747)	NA	NA	NA	NA
	Unigene13928_All	Unigene27665_All	YN	0.00202774	0.00604879	0.335231	0.606315	660	166.078	493.922	NA	2	1	1	NA	NA	0.00303957	2:2:1:1:1:1	0.453788(0.545455:0.459091:0.356818)	NA	NA	NA	NA
	Unigene29108_All	Unigene23134_All	YN	0.00321206	0.00958985	0.334944	0.376989	834	209.968	624.032	NA	4	2	2	NA	NA	0.00481774	2:2:1:1:1:1	0.436451(0.519784:0.410072:0.379496)	NA	NA	NA	NA
	Unigene9564_All	Unigene23018_All	YN	0.0156355	0.0467017	0.334794	0.0103282	1002	290.694	711.306	NA	24	13	11	NA	NA	0.0246482	4.83581:4.83581:1:1:1:1	0.473632(0.507463:0.479104:0.434328)	NA	NA	NA	NA
	Unigene9658_All	Unigene33691_All	YN	0.0045749	0.0136837	0.334333	0.235523	879	221.246	657.754	NA	6	3	3	NA	NA	0.00686759	2:2:1:1:1:1	0.433223(0.509934:0.403974:0.385762)	NA	NA	NA	NA
	Unigene36347_All	Unigene21797_All	YN	0.00706438	0.0211574	0.333897	0.144382	903	191.886	711.114	NA	9	4	5	NA	NA	0.0100591	1.24997:1.24997:1:1:1:1	0.468439(0.593023:0.388704:0.423588)	NA	NA	NA	NA
	Unigene21776_All	Unigene22386_All	YN	0.0031137	0.00932578	0.333881	0.0636928	1719	431.591	1287.41	NA	8	4	4	NA	NA	0.00467338	3.87335:3.87335:1:1:1:1	0.414194(0.518325:0.388307:0.335951)	NA	NA	NA	NA
	Unigene74143_All	Unigene4397_All	YN	0.0121761	0.0365101	0.333499	0.0600201	831	168.371	662.629	NA	14	6	8	NA	NA	0.0171064	1.74628:1.74628:1:1:1:1	0.40484(0.478548:0.425743:0.310231)	NA	NA	NA	NA
	Unigene37849_All	Unigene16685_All	YN	0.0164626	0.0493667	0.333477	0.021746	849	233.212	615.788	NA	21	11	10	NA	NA	0.0255011	6.57758:6.57758:1:1:1:1	0.44523(0.530035:0.44523:0.360424)	NA	NA	NA	NA
	Unigene42152_All	Unigene29982_All	YN	0.00563667	0.0169032	0.333468	0.101829	714	179.769	534.231	NA	6	3	3	NA	NA	0.00847332	2.50629:2.50629:1:1:1:1	0.42507(0.556723:0.361345:0.357143)	NA	NA	NA	NA
	Unigene21889_All	Unigene21800_All	YN	0.00322261	0.00967515	0.333081	0.234722	1245	312.077	932.923	NA	6	3	3	NA	NA	0.00484003	2:2:1:1:1:1	0.43026(0.50591:0.393617:0.391253)	NA	NA	NA	NA
	Unigene24256_All	Unigene37487_All	YN	0.00125621	0.00377896	0.332423	0.605023	1062	265.29	796.71	NA	2	1	1	NA	NA	0.0018864	2:2:1:1:1:1	0.456685(0.471751:0.411017:0.487288)	NA	NA	NA	NA
	Unigene38591_All	Unigene32867_All	YN	0.00396898	0.0119463	0.332235	0.234244	1011	253.129	757.871	NA	6	3	3	NA	NA	0.0059663	1.95552:1.95552:1:1:1:1	0.476401(0.556047:0.501475:0.371681)	NA	NA	NA	NA
	Unigene20043_All	Unigene18191_All	YN	0.0036981	0.0111449	0.331819	0.375152	723	180.791	542.209	NA	4	2	2	NA	NA	0.00556022	2:2:1:1:1:1	0.48686(0.578838:0.340249:0.541494)	NA	NA	NA	NA
	Unigene24446_All	Unigene37497_All	YN	0.00329937	0.00994478	0.331769	0.375086	810	202.447	607.553	NA	4	2	2	NA	NA	0.00496029	1.99581:1.99581:1:1:1:1	0.491358(0.561111:0.42037:0.492593)	NA	NA	NA	NA
	Unigene28399_All	Unigene34409_All	YN	0.00197656	0.00596179	0.331537	0.22991	675	168.402	506.598	NA	2	1	1	NA	NA	0.00297081	2:2:1:1:1:1	0.462222(0.48:0.38:0.526667)	NA	NA	NA	NA
	Unigene12856_All	Unigene9504_All	YN	0.0105733	0.031914	0.331306	0.00601683	1611	442.678	1168.32	NA	26	13.7566	12.2434	NA	NA	0.0164374	8.56795:8.56795:1:1:1:1	0.418367(0.473098:0.424861:0.357143)	NA	NA	NA	NA
	Unigene31109_All	Unigene8832_All	YN	0.00262541	0.00792712	0.331193	0.164233	1017	253.711	763.289	NA	4	2	2	NA	NA	0.00394803	2:2:1:1:1:1	0.423795(0.482301:0.427729:0.361357)	NA	NA	NA	NA
	Unigene25253_All	Unigene6607_All	YN	0.00401435	0.0121299	0.330947	0.374902	666	166.407	499.593	NA	4	2	2	NA	NA	0.0060421	2:2:1:1:1:1	0.425532(0.489362:0.395745:0.391489)	NA	NA	NA	NA
	Unigene39384_All	Unigene16303_All	YN	0.00801701	0.0242316	0.33085	0.142918	795	167.901	627.099	NA	9	4	5	NA	NA	0.0114414	0.721085:0.721085:1:1:1:1	0.443609(0.567669:0.390977:0.37218)	NA	NA	NA	NA
	Unigene36265_All	Unigene33626_All	YN	0.00168942	0.00511125	0.330531	0.604473	789	196.314	592.686	NA	2	1	1	NA	NA	0.00254082	2:2:1:1:1:1	0.488722(0.580827:0.387218:0.49812)	NA	NA	NA	NA
	Unigene15852_All	Unigene16404_All	YN	0.00841834	0.025476	0.330442	0.0712641	837	239.683	597.317	NA	11	6	5	NA	NA	0.0133029	3.61721:3.61721:1:1:1:1	0.418757(0.464158:0.351254:0.44086)	NA	NA	NA	NA
	Unigene23891_All	Unigene79400_All	YN	0.0121886	0.0368875	0.330426	0.0623249	747	167.93	579.07	NA	13	6	7	NA	NA	0.017741	1.69966:1.69966:1:1:1:1	0.394913(0.467871:0.321285:0.395582)	NA	NA	NA	NA
	Unigene37997_All	Unigene38327_All	YN	0.00765192	0.0231602	0.330391	0.223729	657	131.543	525.457	NA	7	3	4	NA	NA	0.0107569	0.995902:0.995902:1:1:1:1	0.388393(0.430804:0.375:0.359375)	NA	NA	NA	NA
	Unigene26687_All	Unigene5145_All	YN	0.00369882	0.0111972	0.330334	0.102199	1083	269.929	813.071	NA	6	3	3	NA	NA	0.00556773	2:2:1:1:1:1	0.470639(0.511658:0.40544:0.494819)	NA	NA	NA	NA
	Unigene4431_All	Unigene9816_All	YN	0.00143727	0.0043537	0.330127	0.604316	927	230.487	696.513	NA	2	1	1	NA	NA	0.00216241	2:2:1:1:1:1	0.421222(0.524116:0.382637:0.356913)	NA	NA	NA	NA
	Unigene16435_All	Unigene33505_All	YN	0.0018583	0.00563252	0.329924	0.230269	717	178.208	538.792	NA	2	1	1	NA	NA	0.00279637	2:2:1:1:1:1	0.425384(0.493724:0.393305:0.389121)	NA	NA	NA	NA
	Unigene8942_All	Unigene19769_All	YN	0.00447488	0.0135695	0.329774	0.374073	597	148.726	448.274	NA	4	2	2	NA	NA	0.00674057	2:2:1:1:1:1	0.430746(0.5:0.39726:0.394977)	NA	NA	NA	NA
	Unigene2985_All	Unigene26644_All	YN	0.0103091	0.0312712	0.329668	0.0185668	1110	327.799	782.201	NA	18	10	8	NA	NA	0.0164995	9.29896:9.29896:1:1:1:1	0.432082(0.525469:0.396783:0.373995)	NA	NA	NA	NA
	Unigene8788_All	Unigene23811_All	YN	0.0103821	0.0314962	0.329631	0.0646013	777	194.527	582.473	NA	12	6	6	NA	NA	0.0156682	2.69884:2.69884:1:1:1:1	0.447876(0.573359:0.430502:0.339768)	NA	NA	NA	NA
	Unigene7101_All	Unigene7107_All	YN	0.00421316	0.0127984	0.329195	0.232605	951	236.679	714.321	NA	6	3	3	NA	NA	0.00634979	3.6771:3.6771:1:1:1:1	0.406096(0.488201:0.379056:0.351032)	NA	NA	NA	NA
	Unigene17912_All	Unigene15216_All	YN	0.00309771	0.00941125	0.32915	0.373724	861	214.027	646.973	NA	4	2	2	NA	NA	0.00466713	2:2:1:1:1:1	0.436121(0.531359:0.381533:0.39547)	NA	NA	NA	NA
	Unigene7653_All	Unigene35614_All	YN	0.00170373	0.00517795	0.329036	0.37332	1563	387.588	1175.41	NA	4	2	2	NA	NA	0.00256526	2:2:1:1:1:1	0.443378(0.498081:0.389635:0.442418)	NA	NA	NA	NA
	Unigene19478_All	Unigene39564_All	YN	0.00428711	0.0130357	0.328874	0.0436258	2181	543.188	1637.81	NA	14	7	7	NA	NA	0.00646598	4.37467:4.37467:1:1:1:1	0.417928(0.515818:0.365199:0.372765)	NA	NA	NA	NA
	Unigene35798_All	Unigene12496_All	YN	0.00790361	0.0240354	0.328832	0.148416	678	169.207	508.793	NA	8	4	4	NA	NA	0.0119296	1.19382:1.19382:1:1:1:1	0.540404(0.519481:0.504329:0.597403)	NA	NA	NA	NA
	Unigene42861_All	Unigene40466_All	YN	0.00325408	0.00991487	0.328202	0.373034	819	203.053	615.947	NA	4	2	2	NA	NA	0.00490548	2:2:1:1:1:1	0.461538(0.604396:0.470696:0.309524)	NA	NA	NA	NA
	Unigene35705_All	Unigene27200_All	YN	0.00613212	0.0186924	0.328053	0.232173	654	162.77	491.23	NA	6	3	3	NA	NA	0.00925817	2.26065:2.26065:1:1:1:1	0.429664(0.488532:0.357798:0.442661)	NA	NA	NA	NA
	Unigene9986_All	Unigene33014_All	YN	0.00330298	0.01007	0.328	0.372858	807	199.945	607.055	NA	4	2	2	NA	NA	0.00497961	2:2:1:1:1:1	0.433815(0.469314:0.361011:0.471119)	NA	NA	NA	NA
	Unigene35928_All	Unigene23681_All	YN	0.0169854	0.0517865	0.32799	0.00989586	858	261.824	596.176	NA	23	13	10	NA	NA	0.0276052	5.43762:5.43762:1:1:1:1	0.418403(0.503472:0.333333:0.418403)	NA	NA	NA	NA
	Unigene36440_All	Unigene33792_All	YN	0.00147765	0.00450822	0.327767	0.603479	900	222.582	677.418	NA	2	1	1	NA	NA	0.00222715	2:2:1:1:1:1	0.476111(0.521667:0.48:0.426667)	NA	NA	NA	NA
	Unigene2610_All	Unigene34586_All	YN	0.00466363	0.0142372	0.327567	0.231514	858	212.722	645.278	NA	6	3	3	NA	NA	0.00703718	2:2:1:1:1:1	0.462704(0.552448:0.407343:0.428322)	NA	NA	NA	NA
	Unigene38254_All	Unigene14694_All	YN	0.00121372	0.00370712	0.327402	0.603205	1095	270.419	824.581	NA	2	1	1	NA	NA	0.00182948	2:2:1:1:1:1	0.459361(0.549315:0.416438:0.412329)	NA	NA	NA	NA
	Unigene29916_All	Unigene7032_All	YN	0.00150435	0.00459974	0.32705	0.372179	1767	436.142	1330.86	NA	4	2	2	NA	NA	0.00226837	2.00424:2.00424:1:1:1:1	0.430956(0.529711:0.404924:0.358234)	NA	NA	NA	NA
	Unigene4907_All	Unigene18006_All	YN	0.00464261	0.0141985	0.326979	0.0185809	2802	640.68	2161.32	NA	19	9	10	NA	NA	0.00682758	2.84463:2.84463:1:1:1:1	0.451159(0.518717:0.449733:0.385027)	NA	NA	NA	NA
	Unigene9602_All	Unigene5055_All	YN	0.00400062	0.0122428	0.326774	0.372273	666	164.699	501.301	NA	4	2	2	NA	NA	0.00603886	1.99695:1.99695:1:1:1:1	0.427928(0.441441:0.423423:0.418919)	NA	NA	NA	NA
	Unigene19955_All	Unigene67161_All	YN	0.00266608	0.00816336	0.326591	0.23084	1497	369.499	1127.5	NA	6	3	3	NA	NA	0.00402295	4.06357:4.06357:1:1:1:1	0.4499(0.514028:0.526052:0.309619)	NA	NA	NA	NA
	Unigene5293_All	Unigene21899_All	YN	0.00612905	0.0187693	0.326547	0.0155102	2016	541.192	1474.81	NA	19	10	9	NA	NA	0.0095223	5.27356:5.27356:1:1:1:1	0.428081(0.5081:0.431517:0.344624)	NA	NA	NA	NA
	Unigene20916_All	Unigene27016_All	YN	0.00571689	0.0175163	0.326375	0.0464869	1458	404.312	1053.69	NA	13	7	6	NA	NA	0.00898894	3.84159:3.84159:1:1:1:1	0.451303(0.514403:0.378601:0.460905)	NA	NA	NA	NA
	Unigene16418_All	Unigene16366_All	YN	0.00137901	0.00423175	0.325872	0.602746	963	237.087	725.913	NA	2	1	1	NA	NA	0.00208134	2:2:1:1:1:1	0.443925(0.545171:0.395639:0.390966)	NA	NA	NA	NA
	Unigene21396_All	Unigene29245_All	YN	0.00718255	0.0220504	0.325733	0.0629079	1116	276.123	839.877	NA	12	6	6	NA	NA	0.0108612	3.97015:3.97015:1:1:1:1	0.444298(0.553947:0.421053:0.357895)	NA	NA	NA	NA
	Unigene41231_All	Unigene19294_All	YN	0.00989307	0.0303851	0.32559	0.020296	1221	304.489	916.511	NA	18	9	9	NA	NA	0.0150033	3.97012:3.97012:1:1:1:1	0.418509(0.502457:0.416462:0.336609)	NA	NA	NA	NA
	Unigene36521_All	Unigene34882_All	YN	0.00335274	0.0102987	0.32555	0.146472	1587	391.181	1195.82	NA	8	4	4	NA	NA	0.00506485	1.8785:1.8785:1:1:1:1	0.433092(0.490054:0.387884:0.421338)	NA	NA	NA	NA
	Unigene34327_All	Unigene16311_All	YN	0.00302484	0.00929636	0.325379	0.371383	879	216.474	662.526	NA	4	2	2	NA	NA	0.00456935	2:2:1:1:1:1	0.459613(0.448805:0.414676:0.515358)	NA	NA	NA	NA
	Unigene2038_All	Unigene33791_All	YN	0.00712528	0.0219071	0.32525	0.146879	750	185.861	564.139	NA	8	4	4	NA	NA	0.0107884	2:2:1:1:1:1	0.474(0.528:0.46:0.434)	NA	NA	NA	NA
	Unigene39764_All	Unigene33614_All	YN	0.00628457	0.0193354	0.325029	0.0105814	1539	419.664	1119.34	NA	15	8	7	NA	NA	0.00984336	4.1208:4.1208:1:1:1:1	0.4238(0.532101:0.331712:0.407588)	NA	NA	NA	NA
	Unigene7917_All	Unigene28482_All	YN	0.00428613	0.013188	0.325001	0.371365	621	153.044	467.956	NA	4	2	2	NA	NA	0.00647998	2.56235:2.56235:1:1:1:1	0.416279(0.502326:0.344186:0.402326)	NA	NA	NA	NA
	Unigene29008_All	Unigene24094_All	YN	0.0108538	0.0335093	0.323905	0.028392	987	244.414	742.586	NA	16	8	8	NA	NA	0.0164641	2.92743:2.92743:1:1:1:1	0.440729(0.547112:0.457447:0.317629)	NA	NA	NA	NA
	Unigene23971_All	Unigene64152_All	YN	0.00894107	0.02761	0.323835	0.0419896	1047	259.085	787.915	NA	14	7	7	NA	NA	0.0135608	3.46676:3.46676:1:1:1:1	0.472779(0.575931:0.422636:0.419771)	NA	NA	NA	NA
	Unigene20547_All	Unigene33134_All	YN	0.00718122	0.0221802	0.323767	0.0166448	1578	457.551	1120.45	NA	18	10	8	NA	NA	0.0115303	8.78952:8.78952:1:1:1:1	0.405975(0.522847:0.336555:0.358524)	NA	NA	NA	NA
	Unigene25757_All	Unigene33425_All	YN	0.00618701	0.0191107	0.323746	0.0626689	1293	319.207	973.793	NA	12	6	6	NA	NA	0.00937752	2.41477:2.41477:1:1:1:1	0.412861(0.462329:0.430365:0.34589)	NA	NA	NA	NA
	Unigene29200_All	Unigene24977_All	YN	0.00326756	0.0100944	0.3237	0.370502	813	199.543	613.457	NA	4	2	2	NA	NA	0.00494314	2.01158:2.01158:1:1:1:1	0.418204(0.535055:0.367159:0.352399)	NA	NA	NA	NA
	Unigene24078_All	Unigene37815_All	YN	0.000817487	0.00252905	0.323238	0.601547	1620	396.072	1223.93	NA	2	1	1	NA	NA	0.00123595	2:2:1:1:1:1	0.451401(0.51458:0.401372:0.43825)	NA	NA	NA	NA
	Unigene39917_All	Unigene3627_All	YN	0.00576319	0.0178488	0.322889	0.355747	636	113.391	522.609	NA	5	2	3	NA	NA	0.00791791	2:2:1:1:1:1	0.414308(0.481132:0.304245:0.457547)	NA	NA	NA	NA
	Unigene37883_All	Unigene79423_All	YN	0.00785498	0.0243468	0.322629	0.00724412	1911	502.866	1408.13	NA	23	12	11	NA	NA	0.0121947	4.16445:4.16445:1:1:1:1	0.452119(0.526688:0.50471:0.324961)	NA	NA	NA	NA
	Unigene25107_All	Unigene20770_All	YN	0.00835564	0.0259324	0.322209	0.145347	639	157.518	481.482	NA	8	4	4	NA	NA	0.0126884	3.62721:3.62721:1:1:1:1	0.419697(0.459091:0.436364:0.363636)	NA	NA	NA	NA
	Unigene27772_All	Unigene20749_All	YN	0.00293531	0.00912224	0.321775	0.354931	1245	220.58	1024.42	NA	5	2	3	NA	NA	0.00403147	2:2:1:1:1:1	0.405495(0.503297:0.351648:0.361538)	NA	NA	NA	NA
	Unigene6103_All	Unigene17110_All	YN	0.00976881	0.0303618	0.321746	0.0189223	1230	302.657	927.343	NA	18	9	9	NA	NA	0.014836	1.76772:1.76772:1:1:1:1	0.433862(0.543084:0.42517:0.333333)	NA	NA	NA	NA
	Unigene42145_All	Unigene1009_All	YN	0.00538322	0.0167371	0.321634	0.219438	927	181.25	745.75	NA	7	3	4	NA	NA	0.00760317	0.669477:0.669477:1:1:1:1	0.451456(0.522654:0.435275:0.39644)	NA	NA	NA	NA
	Unigene25157_All	Unigene7478_All	YN	0.00245362	0.00762878	0.321628	0.36916	1080	263.501	816.499	NA	4	2	2	NA	NA	0.00371627	2.03258:2.03258:1:1:1:1	0.385129(0.447368:0.334586:0.373434)	NA	NA	NA	NA
	Unigene19192_All	Unigene33848_All	YN	0.00275215	0.00856068	0.321487	0.369121	963	234.962	728.038	NA	4	2	2	NA	NA	0.00416937	2:2:1:1:1:1	0.43406(0.442368:0.380062:0.479751)	NA	NA	NA	NA
	Unigene19401_All	Unigene37133_All	YN	0.00279609	0.008703	0.321279	0.369011	948	231.205	716.795	NA	4	2	2	NA	NA	0.00423671	2.17729:2.17729:1:1:1:1	0.436181(0.501582:0.411392:0.39557)	NA	NA	NA	NA
	Unigene29273_All	Unigene38201_All	YN	0.00648255	0.0202039	0.320856	0.156744	666	201.212	464.788	NA	7	4	3	NA	NA	0.0106281	4.00083:4.00083:1:1:1:1	0.445946(0.509009:0.403153:0.425676)	NA	NA	NA	NA
	Unigene28103_All	Unigene67186_All	YN	0.00761738	0.0237486	0.320751	0.0246624	1287	333.076	953.924	NA	15	7.77122	7.22878	NA	NA	0.0117921	3.16715:3.16715:1:1:1:1	0.452765(0.504608:0.440092:0.413594)	NA	NA	NA	NA
	Unigene20451_All	Unigene15116_All	YN	0.00158046	0.00492761	0.320736	0.600883	837	203.606	633.394	NA	2	1	1	NA	NA	0.00239467	2:2:1:1:1:1	0.441275(0.421141:0.446309:0.456376)	NA	NA	NA	NA
	Unigene39475_All	Unigene135_All	YN	0.00627179	0.0195583	0.320672	0.227471	636	155.397	480.603	NA	6	3	3	NA	NA	0.00951813	2:2:1:1:1:1	0.448899(0.474057:0.398585:0.474057)	NA	NA	NA	NA
	Unigene12092_All	Unigene13442_All	YN	0.00596883	0.0186155	0.320638	0.0581421	723	218.114	504.886	NA	7	4	3	NA	NA	0.00978405	4.43335:4.43335:1:1:1:1	0.517981(0.543568:0.589212:0.421162)	NA	NA	NA	NA
	Unigene3382_All	Unigene40574_All	YN	0.00588009	0.018349	0.320458	0.227335	678	165.505	512.495	NA	6	3	3	NA	NA	0.00892385	2:2:1:1:1:1	0.43906(0.462555:0.431718:0.422907)	NA	NA	NA	NA
	Unigene19451_All	Unigene15735_All	YN	0.00644167	0.0201428	0.3198	0.00342999	2580	707.531	1872.47	NA	26	14	12	NA	NA	0.010199	5.68057:5.68057:1:1:1:1	0.441187(0.548691:0.451832:0.323037)	NA	NA	NA	NA
	Unigene7429_All	Unigene1577_All	YN	0.00458721	0.0143448	0.319781	0.0405483	2025	494.272	1530.73	NA	14	7	7	NA	NA	0.0069689	2.39872:2.39872:1:1:1:1	0.429739(0.483894:0.442577:0.362745)	NA	NA	NA	NA
	Unigene17952_All	Unigene27541_All	YN	0.00220512	0.00689772	0.319688	0.600764	600	145.743	454.257	NA	2	1	1	NA	NA	0.00334498	2:2:1:1:1:1	0.493333(0.495:0.51:0.475)	NA	NA	NA	NA
	Unigene26241_All	Unigene3668_All	YN	0.00500268	0.0156535	0.319588	0.033648	1722	517.504	1204.5	NA	14	8	6	NA	NA	0.00820353	6.92786:6.92786:1:1:1:1	0.433679(0.484429:0.387543:0.429066)	NA	NA	NA	NA
	Unigene36555_All	Unigene33992_All	YN	0.00427758	0.0133885	0.319497	0.0439042	1935	528.318	1406.68	NA	13	7	6	NA	NA	0.00676515	2.38626:2.38626:1:1:1:1	0.471256(0.497826:0.458696:0.457246)	NA	NA	NA	NA
	Unigene1781_All	Unigene2770_All	YN	0.00524399	0.0164158	0.319448	0.0365523	2154	431.533	1722.47	NA	16	7	9	NA	NA	0.00748214	1.19993:1.19993:1:1:1:1	0.409132(0.485616:0.399315:0.342466)	NA	NA	NA	NA
	Unigene39180_All	Unigene17845_All	YN	0.0036631	0.0114717	0.319317	0.367971	723	175.679	547.321	NA	4	2	2	NA	NA	0.00556047	2:2:1:1:1:1	0.413748(0.488327:0.350195:0.402724)	NA	NA	NA	NA
	Unigene5119_All	Unigene36599_All	YN	0.00862057	0.0270094	0.319169	0.00434581	2010	492.765	1517.24	NA	26	13	13	NA	NA	0.0131287	4.41453:4.41453:1:1:1:1	0.412242(0.469764:0.413717:0.353245)	NA	NA	NA	NA
	Unigene21070_All	Unigene59610_All	YN	0.0015673	0.00491097	0.319143	0.600285	843	204.293	638.707	NA	2	1	1	NA	NA	0.00237761	2:2:1:1:1:1	0.448399(0.521352:0.430605:0.393238)	NA	NA	NA	NA
	Unigene28329_All	Unigene26308_All	YN	0.00770781	0.024167	0.31894	0.0230347	1293	379.816	913.184	NA	16	9	7	NA	NA	0.0125427	7.46637:7.46637:1:1:1:1	0.450889(0.515081:0.417633:0.419954)	NA	NA	NA	NA
	Unigene19609_All	Unigene40428_All	YN	0.00399491	0.0125275	0.318892	0.367746	663	160.986	502.014	NA	4	2	2	NA	NA	0.00606674	2:2:1:1:1:1	0.430618(0.556561:0.386878:0.348416)	NA	NA	NA	NA
	Unigene9948_All	Unigene8912_All	YN	0.00317914	0.00997226	0.318798	0.09973	1767	505.578	1261.42	NA	9	5	4	NA	NA	0.0051228	5.52729:5.52729:1:1:1:1	0.398023(0.505085:0.294915:0.394068)	NA	NA	NA	NA
	Unigene15907_All	Unigene56810_All	YN	0.00221406	0.00694548	0.318777	0.367505	1194	289.293	904.707	NA	4	2	2	NA	NA	0.00336043	2:2:1:1:1:1	0.452261(0.518844:0.410804:0.427136)	NA	NA	NA	NA
	Unigene21487_All	Unigene71556_All	YN	0.00561139	0.0176063	0.318715	0.0391827	1182	287.336	894.664	NA	10	5	5	NA	NA	0.00852726	2.89503:2.89503:1:1:1:1	0.418143(0.505063:0.364557:0.38481)	NA	NA	NA	NA
	Unigene26956_All	Unigene23983_All	YN	0.00532023	0.0166979	0.318618	0.0657087	1308	364.582	943.418	NA	11	6	5	NA	NA	0.00849155	5.41492:5.41492:1:1:1:1	0.441514(0.549312:0.456422:0.318807)	NA	NA	NA	NA
	Unigene42765_All	Unigene31132_All	YN	0.00887086	0.0278447	0.318584	0.0919633	750	182.983	567.017	NA	10	5	5	NA	NA	0.0135	1.69246:1.69246:1:1:1:1	0.459132(0.484674:0.43295:0.45977)	NA	NA	NA	NA
	Unigene22848_All	Unigene8098_All	YN	0.00435032	0.0136605	0.318461	0.367478	609	147.745	461.255	NA	4	2	2	NA	NA	0.00660899	2:2:1:1:1:1	0.414692(0.433649:0.469194:0.341232)	NA	NA	NA	NA
	Unigene19974_All	Unigene18996_All	YN	0.00398716	0.0125235	0.318374	0.226218	996	241.564	754.436	NA	6	3	3	NA	NA	0.00605752	2:2:1:1:1:1	0.395954(0.456647:0.323699:0.407514)	NA	NA	NA	NA
	Unigene7034_All	Unigene35466_All	YN	0.00191466	0.00601454	0.318339	0.600187	690	167.047	522.953	NA	2	1	1	NA	NA	0.00290723	2:2:1:1:1:1	0.442754(0.491304:0.415217:0.421739)	NA	NA	NA	NA
	Unigene25326_All	Unigene27058_All	YN	0.00458688	0.0144247	0.317989	0.0433372	1803	490.761	1312.24	NA	13	7	6	NA	NA	0.00726464	2.9039:2.9039:1:1:1:1	0.470882(0.556572:0.409318:0.446755)	NA	NA	NA	NA
	Unigene23438_All	Unigene8715_All	YN	0.00142398	0.00447816	0.317982	0.599854	927	224.074	702.926	NA	2	1	1	NA	NA	0.00216223	2:2:1:1:1:1	0.439051(0.522654:0.401294:0.393204)	NA	NA	NA	NA
	Unigene27243_All	Unigene22739_All	YN	0.0049054	0.0154505	0.31749	0.0993013	1146	327.815	818.185	NA	9	5	4	NA	NA	0.00792186	3.97441:3.97441:1:1:1:1	0.461039(0.541558:0.427273:0.414286)	NA	NA	NA	NA
	Unigene2598_All	Unigene11845_All	YN	0.00536424	0.0169147	0.317134	0.0597221	1482	359.327	1122.67	NA	12	6	6	NA	NA	0.00816478	2.91625:2.91625:1:1:1:1	0.406998(0.468692:0.407919:0.344383)	NA	NA	NA	NA
	Unigene14164_All	Unigene14976_All	YN	0.00215685	0.00680155	0.317111	0.23295	612	147.693	464.307	NA	2	1	1	NA	NA	0.00327774	2:2:1:1:1:1	0.454248(0.585784:0.465686:0.311275)	NA	NA	NA	NA
	Unigene11855_All	Unigene27827_All	YN	0.00336149	0.0106214	0.316483	0.366305	786	189.635	596.365	NA	4	2	2	NA	NA	0.00511307	2:2:1:1:1:1	0.433206(0.576336:0.34542:0.377863)	NA	NA	NA	NA
	Unigene8008_All	Unigene33751_All	YN	0.00323677	0.0102365	0.316199	0.366133	816	196.716	619.284	NA	4	2	2	NA	NA	0.00492422	1.92519:1.92519:1:1:1:1	0.434436(0.507353:0.420956:0.375)	NA	NA	NA	NA
	Unigene36322_All	Unigene33770_All	YN	0.00144955	0.00459145	0.315706	0.598951	909	218.464	690.536	NA	2	1	1	NA	NA	0.00220465	2:2:1:1:1:1	0.443605(0.537764:0.418429:0.374622)	NA	NA	NA	NA
	Unigene8332_All	Unigene4762_All	YN	0.0102728	0.032556	0.315542	0.091447	648	157.906	490.094	NA	10	5	5	NA	NA	0.0157028	1.53234:1.53234:1:1:1:1	0.416315(0.491561:0.398734:0.35865)	NA	NA	NA	NA
	Unigene8977_All	Unigene4104_All	YN	0.0113438	0.035952	0.315525	0.0221502	879	257.163	621.837	NA	16	9	7	NA	NA	0.0185432	2.7007:2.7007:1:1:1:1	0.507395(0.573379:0.453925:0.494881)	NA	NA	NA	NA
	Unigene8531_All	Unigene26323_All	YN	0.00788904	0.0250149	0.315374	0.0219862	1260	367.237	892.763	NA	16	9	7	NA	NA	0.0128805	4.63989:4.63989:1:1:1:1	0.427381(0.510714:0.357143:0.414286)	NA	NA	NA	NA
	Unigene20844_All	Unigene17771_All	YN	0.00744496	0.023621	0.315184	0.216438	669	129.053	539.947	NA	7	3	4	NA	NA	0.0105654	1.13735:1.13735:1:1:1:1	0.408072(0.5:0.360987:0.363229)	NA	NA	NA	NA
	Unigene35800_All	Unigene34943_All	YN	0.00317964	0.0100944	0.314992	0.224269	1245	299.215	945.785	NA	6	3	3	NA	NA	0.00484147	3.47764:3.47764:1:1:1:1	0.471084(0.563855:0.372289:0.477108)	NA	NA	NA	NA
	Unigene19386_All	Unigene21991_All	YN	0.00236198	0.00750359	0.31478	0.165499	1116	267.875	848.125	NA	4	2	2	NA	NA	0.00359612	2.00706:2.00706:1:1:1:1	0.411219(0.460048:0.393462:0.380145)	NA	NA	NA	NA
	Unigene6504_All	Unigene1129_All	YN	0.00670085	0.0213479	0.313888	0.05827	1185	285.077	899.923	NA	12	6	6	NA	NA	0.0102245	7.91361:7.91361:1:1:1:1	0.424473(0.567089:0.405063:0.301266)	NA	NA	NA	NA
	Unigene50803_All	Unigene33783_All	YN	0.00366478	0.0116807	0.313747	0.223775	1080	259.133	820.867	NA	6	3	3	NA	NA	0.00558811	3.92048:3.92048:1:1:1:1	0.401299(0.467532:0.392208:0.344156)	NA	NA	NA	NA
	Unigene1009_All	Unigene32901_All	YN	0.00369328	0.0117782	0.313568	0.364696	714	171.142	542.858	NA	4	2	2	NA	NA	0.0056312	2:2:1:1:1:1	0.396086(0.487854:0.313765:0.38664)	NA	NA	NA	NA
	Unigene17984_All	Unigene16256_All	YN	0.00407297	0.0129894	0.313562	0.151646	1050	311.168	738.832	NA	7	4	3	NA	NA	0.00671536	3.77849:3.77849:1:1:1:1	0.443429(0.480418:0.374674:0.475196)	NA	NA	NA	NA
	Unigene8941_All	Unigene40457_All	YN	0.00179789	0.00573493	0.313498	0.598214	732	175.037	556.963	NA	2	1	1	NA	NA	0.00273933	2:2:1:1:1:1	0.450137(0.581967:0.413934:0.354508)	NA	NA	NA	NA
	Unigene40056_All	Unigene20698_All	YN	0.00201224	0.00642232	0.31332	0.59824	654	156.375	497.625	NA	2	1	1	NA	NA	0.00306671	2:2:1:1:1:1	0.432722(0.451835:0.392202:0.454128)	NA	NA	NA	NA
	Unigene27531_All	Unigene8845_All	YN	0.00351384	0.0112266	0.312992	0.223215	1125	269.228	855.772	NA	6	3	3	NA	NA	0.00535961	2:2:1:1:1:1	0.441778(0.485333:0.448:0.392)	NA	NA	NA	NA
	Unigene20493_All	Unigene24922_All	YN	0.00844463	0.026996	0.312811	0.0314474	1017	302.345	714.655	NA	14	8	6	NA	NA	0.0139598	2.62037:2.62037:1:1:1:1	0.503441(0.522124:0.545723:0.442478)	NA	NA	NA	NA
	Unigene9484_All	Unigene6308_All	YN	0.00629637	0.0201321	0.312753	0.140248	840	201.915	638.085	NA	8	4	4	NA	NA	0.00962214	2.03969:2.03969:1:1:1:1	0.444643(0.510714:0.382143:0.441071)	NA	NA	NA	NA
	Unigene2865_All	Unigene16893_All	YN	0.00539137	0.0172448	0.312637	0.0159798	2391	529.424	1861.58	NA	19	9	10	NA	NA	0.008016	2.28395:2.28395:1:1:1:1	0.392493(0.482252:0.342105:0.353121)	NA	NA	NA	NA
	Unigene35469_All	Unigene36499_All	YN	0.00191416	0.00612584	0.312473	0.597881	687	163.91	523.09	NA	2	1	1	NA	NA	0.00291902	2:2:1:1:1:1	0.413392(0.482533:0.358079:0.399563)	NA	NA	NA	NA
	Unigene19382_All	Unigene33068_All	YN	0.00292494	0.00936137	0.312448	0.150631	1458	430.086	1027.91	NA	7	4	3	NA	NA	0.00482358	3.96501:3.96501:1:1:1:1	0.474623(0.488683:0.451646:0.483539)	NA	NA	NA	NA
	Unigene39131_All	Unigene16080_All	YN	0.0051732	0.0165684	0.312233	0.222834	765	183.086	581.914	NA	6	3	3	NA	NA	0.0079004	2:2:1:1:1:1	0.447059(0.429412:0.384314:0.527451)	NA	NA	NA	NA
	Unigene40400_All	Unigene91345_All	YN	0.00394554	0.012638	0.312195	0.222726	1002	239.384	762.616	NA	6	3	3	NA	NA	0.00602223	1.95975:1.95975:1:1:1:1	0.418663(0.453593:0.377246:0.42515)	NA	NA	NA	NA
	Unigene17793_All	Unigene33711_All	YN	0.0164664	0.0528096	0.311806	0.0226872	771	156.954	614.046	NA	18	8	10	NA	NA	0.0238649	0.856761:0.856761:1:1:1:1	0.458495(0.554475:0.365759:0.455253)	NA	NA	NA	NA
	Unigene1989_All	Unigene40443_All	YN	0.00135561	0.00434802	0.311776	0.597418	969	230.657	738.343	NA	2	1	1	NA	NA	0.00206791	2:2:1:1:1:1	0.434469(0.481424:0.352941:0.46904)	NA	NA	NA	NA
	Unigene41703_All	Unigene33307_All	YN	0.00430585	0.0138146	0.311688	0.363773	612	146.181	465.819	NA	4	2	2	NA	NA	0.00657709	2.48987:2.48987:1:1:1:1	0.443902(0.546341:0.37561:0.409756)	NA	NA	NA	NA
	Unigene19119_All	Unigene19553_All	YN	0.00578386	0.0185591	0.311646	0.214868	858	163.729	694.271	NA	7	3	4	NA	NA	0.0082217	0.65965:0.65965:1:1:1:1	0.456876(0.587413:0.426573:0.356643)	NA	NA	NA	NA
	Unigene18120_All	Unigene25214_All	YN	0.00783951	0.0251677	0.311491	0.0627101	885	243.586	641.414	NA	11	6	5	NA	NA	0.0126089	3.94119:3.94119:1:1:1:1	0.465537(0.513559:0.423729:0.459322)	NA	NA	NA	NA
	Unigene36295_All	Unigene24937_All	YN	0.00519686	0.016694	0.311302	0.15006	822	242.466	579.534	NA	7	4	3	NA	NA	0.00858817	4.16861:4.16861:1:1:1:1	0.422939(0.428315:0.456989:0.383513)	NA	NA	NA	NA
	Unigene21704_All	Unigene35196_All	YN	0.00698374	0.0224611	0.310926	0.0716523	1188	180.765	1007.23	NA	11	4	7	NA	NA	0.00933877	0.472888:0.472888:1:1:1:1	0.423822(0.516414:0.373737:0.381313)	NA	NA	NA	NA
	Unigene42364_All	Unigene27920_All	YN	0.00698612	0.0224783	0.310795	0.088567	945	225.93	719.07	NA	10	5	5	NA	NA	0.01069	1.70487:1.70487:1:1:1:1	0.462434(0.498413:0.520635:0.368254)	NA	NA	NA	NA
	Unigene863_All	Unigene32996_All	YN	0.00647227	0.0208388	0.310588	0.139219	816	195.207	620.793	NA	8	4	4	NA	NA	0.0099091	1.86624:1.86624:1:1:1:1	0.439338(0.492647:0.378676:0.446691)	NA	NA	NA	NA
	Unigene9211_All	Unigene31106_All	YN	0.00186671	0.00601201	0.310497	0.362781	1407	334.066	1072.93	NA	4	2	2	NA	NA	0.00285094	2.14133:2.14133:1:1:1:1	0.447163(0.518085:0.440426:0.382979)	NA	NA	NA	NA
	Unigene3207_All	Unigene359_All	YN	0.00169165	0.00544883	0.310461	0.221818	2328	552.579	1775.42	NA	6	3	3	NA	NA	0.00258346	2:2:1:1:1:1	0.457369(0.579049:0.413882:0.379177)	NA	NA	NA	NA
	Unigene22044_All	Unigene16391_All	YN	0.00384795	0.012395	0.310445	0.222031	1026	244.335	781.665	NA	6	3	3	NA	NA	0.00588336	1.93043:1.93043:1:1:1:1	0.417154(0.505848:0.355263:0.390351)	NA	NA	NA	NA
	Unigene27885_All	Unigene35962_All	YN	0.00191955	0.00618755	0.310228	0.596998	684	162.283	521.717	NA	2	1	1	NA	NA	0.00293216	2:2:1:1:1:1	0.46345(0.557018:0.427632:0.405702)	NA	NA	NA	NA
	Unigene535_All	Unigene9040_All	YN	0.00432285	0.0139407	0.31009	0.0632888	1218	289.606	928.394	NA	8	4	4	NA	NA	0.00660969	2:2:1:1:1:1	0.41954(0.435961:0.410099:0.412562)	NA	NA	NA	NA
	Unigene42512_All	Unigene59969_All	YN	0.00691525	0.0223166	0.309871	0.149069	618	181.919	436.081	NA	7	4	3	NA	NA	0.0114489	4.10749:4.10749:1:1:1:1	0.403722(0.449029:0.354369:0.407767)	NA	NA	NA	NA
	Unigene20795_All	Unigene37926_All	YN	0.00116555	0.00376591	0.309501	0.2348	1125	266.372	858.628	NA	2	1	1	NA	NA	0.00178125	2:2:1:1:1:1	0.412889(0.430667:0.429333:0.378667)	NA	NA	NA	NA
	Unigene42115_All	Unigene16095_All	YN	0.00232034	0.00750786	0.309055	0.362008	1131	267.723	863.277	NA	4	2	2	NA	NA	0.0035483	2:2:1:1:1:1	0.396994(0.458886:0.323607:0.408488)	NA	NA	NA	NA
	Unigene4230_All	Unigene13328_All	YN	0.00625471	0.020253	0.308828	0.0568688	1266	301.569	964.431	NA	12	6	6	NA	NA	0.00958921	2:2:1:1:1:1	0.449173(0.469267:0.469267:0.408983)	NA	NA	NA	NA
	Unigene43148_All	Unigene11469_All	YN	0.00546946	0.017727	0.308539	0.138151	963	228.887	734.113	NA	8	4	4	NA	NA	0.00838284	1.97216:1.97216:1:1:1:1	0.40625(0.456845:0.354167:0.407738)	NA	NA	NA	NA
	Unigene14124_All	Unigene33154_All	YN	0.00371169	0.0120324	0.308473	0.361864	708	167.656	540.344	NA	4	2	2	NA	NA	0.00568206	2:2:1:1:1:1	0.458333(0.489407:0.444915:0.440678)	NA	NA	NA	NA
	Unigene783_All	Unigene21937_All	YN	0.0105168	0.0341026	0.308386	0.040639	786	211.473	574.527	NA	13	7	6	NA	NA	0.0168625	13.4247:13.4247:1:1:1:1	0.424632(0.509191:0.459559:0.305147)	NA	NA	NA	NA
	Unigene19542_All	Unigene27694_All	YN	0.00637262	0.0206811	0.308138	0.00174205	2886	836.538	2049.46	NA	30	17	13	NA	NA	0.0105201	5.23362:5.23362:1:1:1:1	0.419612(0.465177:0.37422:0.419439)	NA	NA	NA	NA
	Unigene38446_All	Unigene1953_All	YN	0.00520281	0.0169307	0.307301	0.137575	1011	239.515	771.485	NA	8	4	4	NA	NA	0.00798124	2:2:1:1:1:1	0.413947(0.468843:0.393175:0.379822)	NA	NA	NA	NA
	Unigene32984_All	Unigene34002_All	YN	0.00503356	0.0163942	0.307033	0.137093	1044	246.665	797.335	NA	8	4	4	NA	NA	0.00771773	2:2:1:1:1:1	0.400691(0.465026:0.335492:0.401554)	NA	NA	NA	NA
	Unigene36490_All	Unigene23030_All	YN	0.00921107	0.0300076	0.306958	0.0131989	1215	340.598	874.402	NA	18	10	8	NA	NA	0.0150409	4.26459:4.26459:1:1:1:1	0.478189(0.490123:0.420988:0.523457)	NA	NA	NA	NA
	Unigene37375_All	Unigene556_All	YN	0.00383133	0.0124846	0.306884	0.068347	1533	485.779	1047.22	NA	10	6	4	NA	NA	0.00657339	5.5861:5.5861:1:1:1:1	0.461414(0.550584:0.349222:0.484436)	NA	NA	NA	NA
	Unigene25667_All	Unigene26774_All	YN	0.00803538	0.0262096	0.306582	0.0937109	696	194.999	501.001	NA	9	5	4	NA	NA	0.0131273	6.23646:6.23646:1:1:1:1	0.436782(0.482759:0.424569:0.403017)	NA	NA	NA	NA
	Unigene48316_All	Unigene19544_All	YN	0.00688077	0.0224557	0.306415	0.0388946	957	226.878	730.122	NA	10	5	5	NA	NA	0.0105732	1.1904:1.1904:1:1:1:1	0.461577(0.522455:0.441617:0.420659)	NA	NA	NA	NA
	Unigene22619_All	Unigene36674_All	YN	0.00188854	0.00616689	0.306239	0.595457	693	162.824	530.176	NA	2	1	1	NA	NA	0.00289376	2:2:1:1:1:1	0.466089(0.478355:0.437229:0.482684)	NA	NA	NA	NA
	Unigene29781_All	Unigene5583_All	YN	0.0090038	0.0294152	0.306093	0.0558825	879	208.588	670.412	NA	12	6	6	NA	NA	0.0138475	1.85747:1.85747:1:1:1:1	0.399782(0.439542:0.388889:0.370915)	NA	NA	NA	NA
	Unigene36455_All	Unigene25497_All	YN	0.00153006	0.00499973	0.306029	0.595231	855	200.678	654.322	NA	2	1	1	NA	NA	0.00234443	2:2:1:1:1:1	0.414676(0.5:0.399317:0.34471)	NA	NA	NA	NA
	Unigene39806_All	Unigene1718_All	YN	0.00198234	0.00648459	0.3057	0.595279	660	154.879	505.121	NA	2	1	1	NA	NA	0.00303887	2:2:1:1:1:1	0.508076(0.526432:0.477974:0.519824)	NA	NA	NA	NA
	Unigene42860_All	Unigene37013_All	YN	0.00441792	0.0144647	0.305428	0.219298	891	209.682	681.318	NA	6	3	3	NA	NA	0.00678226	2:2:1:1:1:1	0.429854(0.459596:0.392256:0.43771)	NA	NA	NA	NA
	Unigene2736_All	Unigene32598_All	YN	0.00379952	0.0124402	0.305423	0.166081	690	162.106	527.894	NA	4	2	2	NA	NA	0.00582953	2:2:1:1:1:1	0.421739(0.465217:0.393478:0.406522)	NA	NA	NA	NA
	Unigene29836_All	Unigene749_All	YN	0.00713942	0.0233925	0.305201	0.0360985	1290	304.745	985.255	NA	14	7	7	NA	NA	0.010979	2.08992:2.08992:1:1:1:1	0.426312(0.458333:0.355324:0.465278)	NA	NA	NA	NA
	Unigene21040_All	Unigene33138_All	YN	0.0144987	0.047574	0.30476	0.0215524	942	175.652	766.348	NA	19	8	11	NA	NA	0.0206661	0.708316:0.708316:1:1:1:1	0.435244(0.542994:0.351911:0.410828)	NA	NA	NA	NA
	Unigene18095_All	Unigene23770_All	YN	0.002148	0.00705022	0.304672	0.595023	609	142.654	466.346	NA	2	1	1	NA	NA	0.00329631	2:2:1:1:1:1	0.458949(0.546798:0.384236:0.445813)	NA	NA	NA	NA
	Unigene19412_All	Unigene26244_All	YN	0.0105721	0.0347509	0.304224	0.0138593	1044	258.794	785.206	NA	17	8.75741	8.24259	NA	NA	0.0165657	2.9254:2.9254:1:1:1:1	0.43553(0.505731:0.426934:0.373926)	NA	NA	NA	NA
	Unigene23715_All	Unigene14662_All	YN	0.00169471	0.00557089	0.304207	0.594647	771	180.26	590.74	NA	2	1	1	NA	NA	0.00260096	2:2:1:1:1:1	0.421835(0.498062:0.348837:0.418605)	NA	NA	NA	NA
	Unigene7807_All	Unigene33882_All	YN	0.00152241	0.00500474	0.304193	0.594521	858	200.478	657.522	NA	2	1	1	NA	NA	0.00233608	2:2:1:1:1:1	0.451049(0.552448:0.396853:0.403846)	NA	NA	NA	NA
	Unigene34946_All	Unigene23507_All	YN	0.00784828	0.0258011	0.304184	0.0289381	1086	317.363	768.637	NA	14	8	6	NA	NA	0.0130947	2.05662:2.05662:1:1:1:1	0.518416(0.546961:0.571823:0.436464)	NA	NA	NA	NA
	Unigene4158_All	Unigene3864_All	YN	0.00200789	0.00660376	0.304052	0.594693	651	152.197	498.803	NA	2	1	1	NA	NA	0.00308235	2:2:1:1:1:1	0.437879(0.5:0.445455:0.368182)	NA	NA	NA	NA
	Unigene7987_All	Unigene2034_All	YN	0.00609579	0.0200605	0.30387	0.0386099	1344	355.179	988.821	NA	13	7	6	NA	NA	0.00978625	3.83153:3.83153:1:1:1:1	0.417783(0.462054:0.410714:0.38058)	NA	NA	NA	NA
	Unigene18741_All	Unigene33069_All	YN	0.0040588	0.013382	0.303302	0.359	645	150.863	494.137	NA	4	2	2	NA	NA	0.00623947	2.02715:2.02715:1:1:1:1	0.435484(0.562212:0.398618:0.345622)	NA	NA	NA	NA
	Unigene23989_All	Unigene26695_All	YN	0.002123	0.00701101	0.302809	0.236174	615	143.3	471.7	NA	2	1	1	NA	NA	0.00326195	2:2:1:1:1:1	0.425566(0.514563:0.398058:0.364078)	NA	NA	NA	NA
	Unigene24618_All	Unigene21305_All	YN	0.00702821	0.0232106	0.302802	0.0218276	1254	395.152	858.848	NA	15	9	6	NA	NA	0.0121275	8.48602:8.48602:1:1:1:1	0.449362(0.462919:0.342105:0.543062)	NA	NA	NA	NA
	Unigene16543_All	Unigene26128_All	YN	0.00994955	0.0328838	0.302567	0.00127985	1917	500.358	1416.64	NA	30	16	14	NA	NA	0.0159356	2.81589:2.81589:1:1:1:1	0.412868(0.507835:0.358974:0.371795)	NA	NA	NA	NA
	Unigene9741_All	Unigene8808_All	YN	0.00547021	0.0180927	0.302343	0.0910961	1014	279.983	734.017	NA	9	5	4	NA	NA	0.00895551	3.70284:3.70284:1:1:1:1	0.478922(0.482353:0.416176:0.538235)	NA	NA	NA	NA
	Unigene24098_All	Unigene18427_All	YN	0.00691484	0.022939	0.301444	0.00152711	2553	602.797	1950.2	NA	27	13.5781	13.4219	NA	NA	0.0106984	2.73125:2.73125:1:1:1:1	0.403539(0.469078:0.365811:0.375729)	NA	NA	NA	NA
	Unigene15149_All	Unigene31317_All	YN	0.00184891	0.00614601	0.300831	0.593374	705	163.474	541.526	NA	2	1	1	NA	NA	0.00284531	2:2:1:1:1:1	0.446099(0.442553:0.423404:0.47234)	NA	NA	NA	NA
	Unigene28581_All	Unigene7179_All	YN	0.0078052	0.0259458	0.300828	0.134181	672	156.85	515.15	NA	8	4	4	NA	NA	0.0120393	2:2:1:1:1:1	0.417758(0.504367:0.327511:0.421397)	NA	NA	NA	NA
	Unigene9503_All	Unigene31700_All	YN	0.00107177	0.00356343	0.300769	0.592996	1215	281.296	933.704	NA	2	1	1	NA	NA	0.00164864	2:2:1:1:1:1	0.418651(0.520238:0.37619:0.359524)	NA	NA	NA	NA
	Unigene3457_All	Unigene58823_All	YN	0.00939286	0.0312332	0.300733	0.0101031	1401	329.482	1071.52	NA	20	10	10	NA	NA	0.0145292	2.42724:2.42724:1:1:1:1	0.428167(0.537155:0.376858:0.370488)	NA	NA	NA	NA
	Unigene20871_All	Unigene17787_All	YN	0.0028175	0.00937629	0.300492	0.216535	1389	321.96	1067.04	NA	6	3	3	NA	NA	0.00433778	2:2:1:1:1:1	0.437322(0.49359:0.391026:0.42735)	NA	NA	NA	NA
	Unigene39139_All	Unigene26678_All	YN	0.0030628	0.0101968	0.300369	0.216661	1278	296.503	981.497	NA	6	3	3	NA	NA	0.00471793	2.33297:2.33297:1:1:1:1	0.403569(0.48861:0.339408:0.382688)	NA	NA	NA	NA
	Unigene38321_All	Unigene25742_All	YN	0.0230468	0.0767473	0.300294	0.00167471	942	192.793	749.207	NA	31	14	17	NA	NA	0.0340373	1.83841:1.83841:1:1:1:1	0.41745(0.49373:0.401254:0.357367)	NA	NA	NA	NA
	Unigene36485_All	Unigene6068_All	YN	0.00471973	0.0157306	0.300035	0.0539659	1662	386.689	1275.31	NA	12	6	6	NA	NA	0.00728157	2.02686:2.02686:1:1:1:1	0.44284(0.518953:0.424188:0.385379)	NA	NA	NA	NA
	Unigene27457_All	Unigene2445_All	YN	0.0133716	0.0445727	0.299996	0.000463161	1779	419.575	1359.43	NA	36	18	18	NA	NA	0.0207304	4.06023:4.06023:1:1:1:1	0.404722(0.482293:0.369309:0.362563)	NA	NA	NA	NA
	Unigene37553_All	Unigene3352_All	YN	0.00585187	0.0195126	0.299902	0.0817349	1290	259.931	1030.07	NA	11	5	6	NA	NA	0.00860447	2:2:1:1:1:1	0.397491(0.474194:0.347312:0.370968)	NA	NA	NA	NA
	Unigene38947_All	Unigene26942_All	YN	0.00391176	0.0130466	0.299831	0.0361398	1413	387.434	1025.57	NA	9	5	4	NA	NA	0.00641645	8.98861:8.98861:1:1:1:1	0.412597(0.435244:0.421444:0.381104)	NA	NA	NA	NA
	Unigene32921_All	Unigene309_All	YN	0.00331865	0.0110725	0.29972	0.356853	786	181.964	604.036	NA	4	2	2	NA	NA	0.00511372	2:2:1:1:1:1	0.414336(0.538462:0.407343:0.297203)	NA	NA	NA	NA
	Unigene9984_All	Unigene39130_All	YN	0.00207757	0.00693257	0.299683	0.592901	627	144.914	482.086	NA	2	1	1	NA	NA	0.00319968	2:2:1:1:1:1	0.440989(0.488038:0.392344:0.442584)	NA	NA	NA	NA
	Unigene37000_All	Unigene6224_All	YN	0.00202797	0.00677681	0.299252	0.356492	1284	296.459	987.541	NA	4	2	2	NA	NA	0.00312442	2:2:1:1:1:1	0.435659(0.537209:0.37907:0.390698)	NA	NA	NA	NA
	Unigene34168_All	Unigene30854_All	YN	0.00212704	0.00711604	0.298907	0.237081	612	141.195	470.805	NA	2	1	1	NA	NA	0.00327806	2:2:1:1:1:1	0.44281(0.52451:0.394608:0.409314)	NA	NA	NA	NA
	Unigene9274_All	Unigene5178_All	YN	0.0115866	0.0387858	0.298733	0.0331387	882	186.092	695.908	NA	15	7	8	NA	NA	0.0173253	1.24219:1.24219:1:1:1:1	0.441176(0.545752:0.415033:0.362745)	NA	NA	NA	NA
	Unigene24226_All	Unigene4171_All	YN	0.00446812	0.0149734	0.298405	0.0360285	1236	337.561	898.439	NA	9	5	4	NA	NA	0.00733718	4.37836:4.37836:1:1:1:1	0.418285(0.463592:0.345874:0.445388)	NA	NA	NA	NA
	Unigene4818_All	Unigene18969_All	YN	0.00164676	0.00554357	0.297058	0.355236	1578	362.113	1215.89	NA	4	2	2	NA	NA	0.00254099	1.9707:1.9707:1:1:1:1	0.447719(0.500951:0.442966:0.39924)	NA	NA	NA	NA
	Unigene528_All	Unigene9356_All	YN	0.00641971	0.0216155	0.296996	0.0529042	1221	282.217	938.783	NA	12	6	6	NA	NA	0.009932	3.03065:3.03065:1:1:1:1	0.432084(0.509368:0.459016:0.327869)	NA	NA	NA	NA
	Unigene42806_All	Unigene26868_All	YN	0.0124476	0.041922	0.296924	0.0102357	828	240.29	587.71	NA	17	9.7552	7.2448	NA	NA	0.0210013	4.59271:4.59271:1:1:1:1	0.443237(0.485507:0.427536:0.416667)	NA	NA	NA	NA
	Unigene27249_All	Unigene25109_All	YN	0.00203413	0.0068572	0.296642	0.591764	639	146.631	492.369	NA	2	1	1	NA	NA	0.00314087	2:2:1:1:1:1	0.428795(0.507042:0.422535:0.356808)	NA	NA	NA	NA
	Unigene29206_All	Unigene17667_All	YN	0.00195991	0.00660831	0.296583	0.591718	663	152.106	510.894	NA	2	1	1	NA	NA	0.00302635	2:2:1:1:1:1	0.429864(0.538462:0.377828:0.373303)	NA	NA	NA	NA
	Unigene193_All	Unigene23152_All	YN	0.00443542	0.0149783	0.296123	0.0881056	1242	337.472	904.528	NA	9	5	4	NA	NA	0.00730009	2.15036:2.15036:1:1:1:1	0.425926(0.475845:0.431159:0.370773)	NA	NA	NA	NA
	Unigene36525_All	Unigene26854_All	YN	0.00303095	0.0102425	0.29592	0.214399	1287	295.19	991.81	NA	6	3	3	NA	NA	0.004685	2.36396:2.36396:1:1:1:1	0.415695(0.551282:0.329837:0.365967)	NA	NA	NA	NA
	Unigene36601_All	Unigene26964_All	YN	0.00474042	0.0160398	0.295541	0.0825242	1374	315.07	1058.93	NA	10	5	5	NA	NA	0.00733146	2:2:1:1:1:1	0.433914(0.521786:0.360566:0.41939)	NA	NA	NA	NA
	Unigene24372_All	Unigene21779_All	YN	0.0061008	0.0206501	0.295436	0.131944	855	196.556	658.444	NA	8	4	4	NA	NA	0.00944555	1.33706:1.33706:1:1:1:1	0.453107(0.547458:0.464407:0.347458)	NA	NA	NA	NA
	Unigene9114_All	Unigene23574_All	YN	0.00154999	0.00524936	0.295272	0.354248	1674	382.334	1291.67	NA	4	2	2	NA	NA	0.00239491	2:2:1:1:1:1	0.442874(0.515018:0.458481:0.355124)	NA	NA	NA	NA
	Unigene41528_All	Unigene18237_All	YN	0.00699222	0.0236933	0.295114	0.0824431	933	214.511	718.489	NA	10	5	5	NA	NA	0.010832	0.613163:0.613163:1:1:1:1	0.483387(0.512862:0.557878:0.379421)	NA	NA	NA	NA
	Unigene21035_All	Unigene17945_All	YN	0.00293602	0.00994996	0.295079	0.354308	885	202.419	682.581	NA	4	2	2	NA	NA	0.00454026	2.33784:2.33784:1:1:1:1	0.387513(0.405573:0.410217:0.346749)	NA	NA	NA	NA
	Unigene39780_All	Unigene15874_All	YN	0.00380292	0.0128913	0.294998	0.354331	684	156.574	527.426	NA	4	2	2	NA	NA	0.00588334	2:2:1:1:1:1	0.409333(0.5:0.384:0.344)	NA	NA	NA	NA
	Unigene28990_All	Unigene17159_All	YN	0.00854341	0.0290059	0.294541	0.0878164	648	176.602	471.398	NA	9	5	4	NA	NA	0.0141201	6.74497:6.74497:1:1:1:1	0.431193(0.538991:0.40367:0.350917)	NA	NA	NA	NA
	Unigene52706_All	Unigene27476_All	YN	0.00397356	0.0135192	0.293919	0.353686	654	149.275	504.725	NA	4	2	2	NA	NA	0.00615235	1.80901:1.80901:1:1:1:1	0.420489(0.522936:0.362385:0.376147)	NA	NA	NA	NA
	Unigene37079_All	Unigene38404_All	YN	0.00926834	0.0315357	0.2939	0.0227147	1020	259.236	760.764	NA	15	8	7	NA	NA	0.0149277	3.68284:3.68284:1:1:1:1	0.445748(0.485337:0.391496:0.460411)	NA	NA	NA	NA
	Unigene6939_All	Unigene24220_All	YN	0.00135832	0.00462207	0.293876	0.590285	954	217.02	736.98	NA	2	1	1	NA	NA	0.00210077	2:2:1:1:1:1	0.419811(0.471698:0.41195:0.375786)	NA	NA	NA	NA
	Unigene42124_All	Unigene14349_All	YN	0.00500182	0.0170534	0.293303	0.0548096	1359	355.991	1003.01	NA	11	6	5	NA	NA	0.00815875	2.34776:2.34776:1:1:1:1	0.450832(0.518438:0.41757:0.416486)	NA	NA	NA	NA
	Unigene29857_All	Unigene20320_All	YN	0.0010175	0.00347494	0.292811	0.589727	1272	288.442	983.558	NA	2	1	1	NA	NA	0.00157476	2:2:1:1:1:1	0.416858(0.494253:0.41954:0.336782)	NA	NA	NA	NA
	Unigene21693_All	Unigene1343_All	YN	0.00680191	0.0232415	0.292663	0.0204606	1680	350.721	1329.28	NA	17	8	9	NA	NA	0.0102339	3.10873:3.10873:1:1:1:1	0.43631(0.5:0.378571:0.430357)	NA	NA	NA	NA
	Unigene24844_All	Unigene16677_All	YN	0.00871918	0.0298048	0.292542	0.0294508	852	274.384	577.616	NA	13	8	5	NA	NA	0.0155097	6.59695:6.59695:1:1:1:1	0.496479(0.600352:0.496479:0.392606)	NA	NA	NA	NA
	Unigene9496_All	Unigene26508_All	YN	0.00157502	0.00538617	0.292419	0.589841	822	186.42	635.58	NA	2	1	1	NA	NA	0.00243934	2:2:1:1:1:1	0.431111(0.463333:0.42:0.41)	NA	NA	NA	NA
	Unigene39260_All	Unigene17643_All	YN	0.00697682	0.0238787	0.292178	0.13919	603	170.744	432.256	NA	7	4	3	NA	NA	0.0117627	3.5582:3.5582:1:1:1:1	0.455224(0.567164:0.420398:0.378109)	NA	NA	NA	NA
	Unigene39829_All	Unigene38325_All	YN	0.00309765	0.0106026	0.292158	0.352652	837	189.969	647.031	NA	4	2	2	NA	NA	0.00480101	2:2:1:1:1:1	0.432497(0.491039:0.451613:0.354839)	NA	NA	NA	NA
	Unigene80634_All	Unigene8926_All	YN	0.00389317	0.0133733	0.291114	0.352216	666	150.945	515.055	NA	4	2	2	NA	NA	0.0060418	2:2:1:1:1:1	0.407489(0.508811:0.34141:0.372247)	NA	NA	NA	NA
	Unigene2791_All	Unigene2260_All	YN	0.00433834	0.0149308	0.290563	0.211754	897	203.226	693.774	NA	6	3	3	NA	NA	0.00673819	3.54416:3.54416:1:1:1:1	0.419712(0.509967:0.413621:0.335548)	NA	NA	NA	NA
	Unigene36085_All	Unigene24901_All	YN	0.00615578	0.0211928	0.290466	0.0542014	1104	288.358	815.642	NA	11	6	5	NA	NA	0.0100833	3.9087:3.9087:1:1:1:1	0.435236(0.529891:0.403533:0.372283)	NA	NA	NA	NA
	Unigene80688_All	Unigene79404_All	YN	0.00779616	0.0268802	0.290033	0.0157549	1245	341.65	903.35	NA	16	9	7	NA	NA	0.0130332	8.52916:8.52916:1:1:1:1	0.41077(0.461085:0.40566:0.365566)	NA	NA	NA	NA
	Unigene6994_All	Unigene22569_All	YN	0.00135836	0.00468634	0.289854	0.588621	951	214.054	736.946	NA	2	1	1	NA	NA	0.00210743	2:2:1:1:1:1	0.412723(0.492114:0.350158:0.395899)	NA	NA	NA	NA
	Unigene1164_All	Unigene535_All	YN	0.00908933	0.0313797	0.289657	0.00154194	1389	392.234	996.766	NA	21	12	9	NA	NA	0.0153838	3.94211:3.94211:1:1:1:1	0.431246(0.529158:0.340173:0.424406)	NA	NA	NA	NA
	Unigene6989_All	Unigene38329_All	YN	0.0063043	0.0217954	0.28925	0.0848736	870	232.756	637.244	NA	9	5	4	NA	NA	0.0104487	2.01087:2.01087:1:1:1:1	0.443194(0.524116:0.389068:0.416399)	NA	NA	NA	NA
	Unigene3364_All	Unigene16814_All	YN	0.0101785	0.0352091	0.289087	0.0322688	897	204.509	692.491	NA	14	7	7	NA	NA	0.0158853	1.49858:1.49858:1:1:1:1	0.447603(0.531773:0.448161:0.362876)	NA	NA	NA	NA
	Unigene33080_All	Unigene22345_All	YN	0.0096251	0.0333219	0.288852	0.00402498	1521	370.646	1150.35	NA	23	12	11	NA	NA	0.0153997	2.09922:2.09922:1:1:1:1	0.434421(0.492322:0.396353:0.414587)	NA	NA	NA	NA
	Unigene35662_All	Unigene25155_All	YN	0.0044981	0.0155755	0.288793	0.35093	576	129.808	446.192	NA	4	2	2	NA	NA	0.00699451	2:2:1:1:1:1	0.4025(0.405:0.3925:0.41)	NA	NA	NA	NA
	Unigene4795_All	Unigene389_All	YN	0.00119119	0.00412939	0.288465	0.587994	1083	242.834	840.166	NA	2	1	1	NA	NA	0.00185	2:2:1:1:1:1	0.457418(0.46978:0.450549:0.451923)	NA	NA	NA	NA
	Unigene19433_All	Unigene39037_All	YN	0.00794597	0.0275484	0.288436	0.0216678	1182	296.303	885.697	NA	15	8	7	NA	NA	0.0128599	1.96975:1.96975:1:1:1:1	0.454738(0.492386:0.384518:0.48731)	NA	NA	NA	NA
	Unigene29714_All	Unigene14654_All	YN	0.00265743	0.00923132	0.287871	0.35033	972	218.058	753.942	NA	4	2	2	NA	NA	0.00413221	2:2:1:1:1:1	0.410485(0.477745:0.37092:0.382789)	NA	NA	NA	NA
	Unigene80696_All	Unigene8940_All	YN	0.00733993	0.0255057	0.287776	0.0062514	1554	433.613	1120.39	NA	19	10.8204	8.17964	NA	NA	0.0124087	6.05125:6.05125:1:1:1:1	0.438546(0.551158:0.376448:0.388031)	NA	NA	NA	NA
	Unigene29929_All	Unigene39007_All	YN	0.0040468	0.0141082	0.28684	0.349719	639	143.099	495.901	NA	4	2	2	NA	NA	0.00629997	2:2:1:1:1:1	0.413146(0.528169:0.305164:0.406103)	NA	NA	NA	NA
	Unigene26976_All	Unigene26975_All	YN	0.0046378	0.0161764	0.286702	0.0799734	1395	313.481	1081.52	NA	10	5	5	NA	NA	0.00723071	3.00005:3.00005:1:1:1:1	0.424014(0.545161:0.43871:0.288172)	NA	NA	NA	NA
	Unigene21304_All	Unigene37891_All	YN	0.00829694	0.0289449	0.286646	0.0315085	1095	246.571	848.429	NA	14	7	7	NA	NA	0.0129464	1.21711:1.21711:1:1:1:1	0.482192(0.526027:0.464384:0.456164)	NA	NA	NA	NA
	Unigene26004_All	Unigene24688_All	YN	0.00531797	0.0185707	0.286363	0.021212	1758	436.711	1321.29	NA	15	8	7	NA	NA	0.00861013	2.53772:2.53772:1:1:1:1	0.435369(0.514851:0.405941:0.385314)	NA	NA	NA	NA
	Unigene29676_All	Unigene2051_All	YN	0.00116324	0.00406505	0.286157	0.587011	1107	246.667	860.333	NA	2	1	1	NA	NA	0.00180984	2:2:1:1:1:1	0.414634(0.468835:0.356369:0.418699)	NA	NA	NA	NA
	Unigene8828_All	Unigene38330_All	YN	0.00963825	0.033686	0.28612	0.00326169	1443	398.224	1044.78	NA	23	13	10	NA	NA	0.0162747	5.06402:5.06402:1:1:1:1	0.432779(0.508316:0.385655:0.404366)	NA	NA	NA	NA
	Unigene37421_All	Unigene19808_All	YN	0.0037588	0.0131464	0.285919	0.349352	687	153.53	533.47	NA	4	2	2	NA	NA	0.00585673	2.01386:2.01386:1:1:1:1	0.420833(0.504167:0.439583:0.31875)	NA	NA	NA	NA
	Unigene29379_All	Unigene16180_All	YN	0.00149568	0.00523362	0.285782	0.586976	861	191.74	669.26	NA	2	1	1	NA	NA	0.0023281	2:2:1:1:1:1	0.426505(0.486111:0.376736:0.416667)	NA	NA	NA	NA
	Unigene27562_All	Unigene36976_All	YN	0.0056471	0.0197742	0.28558	0.209203	687	153.737	533.263	NA	6	3	3	NA	NA	0.00880845	1.77203:1.77203:1:1:1:1	0.450509(0.534934:0.39083:0.425764)	NA	NA	NA	NA
	Unigene35113_All	Unigene61703_All	YN	0.00153835	0.00539316	0.28524	0.586807	837	186.185	650.815	NA	2	1	1	NA	NA	0.00239582	2:2:1:1:1:1	0.418728(0.492933:0.427562:0.335689)	NA	NA	NA	NA
	Unigene5345_All	Unigene2845_All	YN	0.00203759	0.00715401	0.284818	0.20903	1896	421.659	1474.34	NA	6	3	3	NA	NA	0.00317545	1.22428:1.22428:1:1:1:1	0.423117(0.525542:0.369195:0.374613)	NA	NA	NA	NA
	Unigene41907_All	Unigene69034_All	YN	0.00841167	0.0295375	0.284779	0.00859268	1422	345.263	1076.74	NA	19	10	9	NA	NA	0.013541	3.80407:3.80407:1:1:1:1	0.460267(0.53481:0.436709:0.409283)	NA	NA	NA	NA
	Unigene6480_All	Unigene39470_All	YN	0.00503447	0.017697	0.284483	0.127471	1026	228.705	797.295	NA	8	4	4	NA	NA	0.00785706	1.91324:1.91324:1:1:1:1	0.420565(0.538012:0.346491:0.377193)	NA	NA	NA	NA
	Unigene22596_All	Unigene2695_All	YN	0.00522216	0.0183836	0.284066	0.0359181	1044	275.328	768.672	NA	9	5	4	NA	NA	0.00869316	1.99181:1.99181:1:1:1:1	0.478927(0.541667:0.489943:0.405172)	NA	NA	NA	NA
	Unigene21940_All	Unigene27055_All	YN	0.00410895	0.0144743	0.283879	0.0788453	1569	348.784	1220.22	NA	10	5	5	NA	NA	0.00641313	1.32154:1.32154:1:1:1:1	0.438496(0.560229:0.433078:0.32218)	NA	NA	NA	NA
	Unigene27801_All	Unigene6348_All	YN	0.0252164	0.0890192	0.28327	2.45065e-05	1164	308.266	855.734	NA	47	25.7887	21.2113	NA	NA	0.0421135	2.06951:2.06951:1:1:1:1	0.471649(0.528351:0.420103:0.466495)	NA	NA	NA	NA
	Unigene37598_All	Unigene31740_All	YN	0.00498577	0.017605	0.283203	0.133941	834	230.025	603.975	NA	7	4	3	NA	NA	0.00846625	3.50995:3.50995:1:1:1:1	0.447183(0.517606:0.411972:0.411972)	NA	NA	NA	NA
	Unigene22168_All	Unigene6777_All	YN	0.00548656	0.0193794	0.283113	0.0323145	1464	365.895	1098.11	NA	13	7	6	NA	NA	0.00895878	2:2:1:1:1:1	0.447028(0.520349:0.443798:0.376938)	NA	NA	NA	NA
	Unigene8358_All	Unigene22802_All	YN	0.002615	0.00924208	0.282945	0.347635	984	217.793	766.207	NA	4	2	2	NA	NA	0.0040818	1.90529:1.90529:1:1:1:1	0.402332(0.494169:0.354227:0.358601)	NA	NA	NA	NA
	Unigene407_All	Unigene11555_All	YN	0.00663538	0.023456	0.282887	0.051213	1017	259.819	757.181	NA	11	6	5	NA	NA	0.0109326	2.64458:2.64458:1:1:1:1	0.428977(0.576705:0.372159:0.338068)	NA	NA	NA	NA
	Unigene39805_All	Unigene39578_All	YN	0.0035296	0.0124786	0.282852	0.133957	1176	323.788	852.212	NA	7	4	3	NA	NA	0.00599353	2.17669:2.17669:1:1:1:1	0.456207(0.494898:0.373724:0.5)	NA	NA	NA	NA
	Unigene24461_All	Unigene70625_All	YN	0.00470215	0.0166715	0.282048	0.207606	822	181.992	640.008	NA	6	3	3	NA	NA	0.00735217	2:2:1:1:1:1	0.394649(0.429766:0.349498:0.404682)	NA	NA	NA	NA
	Unigene2157_All	Unigene33061_All	YN	0.00319165	0.0113301	0.281697	0.207433	1209	266.787	942.213	NA	6	3	3	NA	NA	0.00498753	2:2:1:1:1:1	0.433416(0.493797:0.418114:0.388337)	NA	NA	NA	NA
	Unigene29274_All	Unigene16884_All	YN	0.00428048	0.0152074	0.281474	0.126457	1203	265.827	937.173	NA	8	4	4	NA	NA	0.006695	1.24152:1.24152:1:1:1:1	0.404655(0.507883:0.341216:0.364865)	NA	NA	NA	NA
	Unigene4494_All	Unigene33500_All	YN	0.00377788	0.0134348	0.281202	0.346738	681	150.205	530.795	NA	4	2	2	NA	NA	0.00590785	2:2:1:1:1:1	0.406021(0.486784:0.334802:0.396476)	NA	NA	NA	NA
	Unigene38819_All	Unigene7432_All	YN	0.00363217	0.0129289	0.280935	0.346601	708	156.03	551.97	NA	4	2	2	NA	NA	0.00568098	2:2:1:1:1:1	0.430791(0.514831:0.430085:0.347458)	NA	NA	NA	NA
	Unigene38048_All	Unigene3421_All	YN	0.00507261	0.0180731	0.280671	0.207131	762	168.322	593.678	NA	6	3	3	NA	NA	0.00794437	3.76449:3.76449:1:1:1:1	0.432415(0.505906:0.391732:0.399606)	NA	NA	NA	NA
	Unigene3612_All	Unigene35701_All	YN	0.0127364	0.0453985	0.280548	0.0304183	714	159.5	554.5	NA	14	7	7	NA	NA	0.0200328	0.630194:0.630194:1:1:1:1	0.44084(0.564885:0.444656:0.312977)	NA	NA	NA	NA
	Unigene38247_All	Unigene4000_All	YN	0.00668408	0.0238708	0.28001	0.00894151	1629	426.759	1202.24	NA	18	10	8	NA	NA	0.0111866	3.16318:3.16318:1:1:1:1	0.435543(0.535912:0.384899:0.38582)	NA	NA	NA	NA
	Unigene26080_All	Unigene21558_All	YN	0.00644054	0.0230434	0.279496	0.13235	645	176.825	468.175	NA	7	4	3	NA	NA	0.0109922	2.38316:2.38316:1:1:1:1	0.430428(0.603211:0.298165:0.389908)	NA	NA	NA	NA
	Unigene29894_All	Unigene7371_All	YN	0.00129053	0.00461882	0.279406	0.584235	993	217.331	775.669	NA	2	1	1	NA	NA	0.00201897	2:2:1:1:1:1	0.403827(0.540785:0.348943:0.321752)	NA	NA	NA	NA
	Unigene39657_All	Unigene10291_All	YN	0.00585214	0.0209541	0.279283	0.0482561	1320	290.595	1029.41	NA	12	6	6	NA	NA	0.00917681	0.993043:0.993043:1:1:1:1	0.424945(0.486755:0.412804:0.375276)	NA	NA	NA	NA
	Unigene29855_All	Unigene19849_All	YN	0.0012449	0.00445827	0.279234	0.58406	1029	224.969	804.031	NA	2	1	1	NA	NA	0.00194744	2:2:1:1:1:1	0.425766(0.528736:0.425287:0.323276)	NA	NA	NA	NA
	Unigene27059_All	Unigene36074_All	YN	0.00846116	0.0303267	0.279001	0.0550346	678	202.023	475.977	NA	10	6	4	NA	NA	0.0149764	5.44797:5.44797:1:1:1:1	0.457227(0.606195:0.34292:0.422566)	NA	NA	NA	NA
	Unigene35349_All	Unigene8612_All	YN	0.00659058	0.0236679	0.27846	0.0156306	1302	387.095	914.905	NA	15	9	6	NA	NA	0.0116678	2.89219:2.89219:1:1:1:1	0.439847(0.485057:0.394253:0.44023)	NA	NA	NA	NA
	Unigene3848_All	Unigene4600_All	YN	0.00749158	0.0269333	0.278153	0.0773671	861	189.921	671.079	NA	10	5	5	NA	NA	0.0117801	5.41399:5.41399:1:1:1:1	0.413218(0.543103:0.424138:0.272414)	NA	NA	NA	NA
	Unigene7264_All	Unigene51154_All	YN	0.00685406	0.0247905	0.276479	0.0114854	1290	410.083	879.917	NA	16	10	6	NA	NA	0.012556	7.98273:7.98273:1:1:1:1	0.437209(0.483721:0.380233:0.447674)	NA	NA	NA	NA
	Unigene7175_All	Unigene23777_All	YN	0.0015783	0.00571519	0.276159	0.582927	810	175.74	634.26	NA	2	1	1	NA	NA	0.00247585	2:2:1:1:1:1	0.420956(0.483456:0.417279:0.362132)	NA	NA	NA	NA
	Unigene24090_All	Unigene33928_All	YN	0.00306563	0.0111138	0.275841	0.130428	1344	363.149	980.851	NA	7	4	3	NA	NA	0.00524023	3.94427:3.94427:1:1:1:1	0.41891(0.483437:0.388199:0.385093)	NA	NA	NA	NA
	Unigene996_All	Unigene25213_All	YN	0.00363325	0.013176	0.275747	0.34381	705	153.128	551.872	NA	4	2	2	NA	NA	0.00570597	1.91465:1.91465:1:1:1:1	0.404393(0.465116:0.374031:0.374031)	NA	NA	NA	NA
	Unigene39213_All	Unigene35344_All	YN	0.00367129	0.0133169	0.275687	0.204905	1047	227.585	819.415	NA	6	3	3	NA	NA	0.00576793	2:2:1:1:1:1	0.411206(0.525641:0.351852:0.356125)	NA	NA	NA	NA
	Unigene31346_All	Unigene4059_All	YN	0.00364636	0.0132271	0.275674	0.0797254	1482	382.323	1099.68	NA	9	5	4	NA	NA	0.00611798	1.87551:1.87551:1:1:1:1	0.433134(0.500998:0.424152:0.374251)	NA	NA	NA	NA
	Unigene47472_All	Unigene17782_All	YN	0.00304574	0.0110549	0.27551	0.0365095	1773	456.491	1316.51	NA	9	5	4	NA	NA	0.00510784	5.80081:5.80081:1:1:1:1	0.424367(0.472772:0.466172:0.334158)	NA	NA	NA	NA
	Unigene4249_All	Unigene1_All	YN	0.00503999	0.0183041	0.275348	0.0131974	1893	499.109	1393.89	NA	16	9	7	NA	NA	0.0085372	6.9281:6.9281:1:1:1:1	0.393687(0.431818:0.415152:0.334091)	NA	NA	NA	NA
	Unigene9326_All	Unigene5358_All	YN	0.00281382	0.0102275	0.275123	0.34344	909	196.888	712.112	NA	4	2	2	NA	NA	0.00441961	2:2:1:1:1:1	0.407895(0.546053:0.353618:0.324013)	NA	NA	NA	NA
	Unigene27090_All	Unigene18414_All	YN	0.00399096	0.0145122	0.275007	0.0792563	1353	348.043	1004.96	NA	9	5	4	NA	NA	0.00669742	1.9937:1.9937:1:1:1:1	0.453067(0.517738:0.45122:0.390244)	NA	NA	NA	NA
	Unigene52974_All	Unigene26800_All	YN	0.00975496	0.0355057	0.274743	0.00967366	1014	290.962	723.038	NA	17	10	7	NA	NA	0.017144	9.47034:9.47034:1:1:1:1	0.435484(0.555718:0.375367:0.375367)	NA	NA	NA	NA
	Unigene20648_All	Unigene16215_All	YN	0.00649247	0.0236454	0.274576	0.0489362	1032	258.315	773.685	NA	11	6	5	NA	NA	0.010786	3.01613:3.01613:1:1:1:1	0.432171(0.513081:0.322674:0.460756)	NA	NA	NA	NA
	Unigene5319_All	Unigene22338_All	YN	0.00613537	0.022375	0.274206	0.0787663	882	226.813	655.187	NA	9	5	4	NA	NA	0.0103115	5.21762:5.21762:1:1:1:1	0.40011(0.470199:0.354305:0.375828)	NA	NA	NA	NA
	Unigene4963_All	Unigene67478_All	YN	0.00528413	0.0192946	0.273866	0.129194	780	209.99	570.01	NA	7	4	3	NA	NA	0.009056	3.61185:3.61185:1:1:1:1	0.420152(0.494297:0.311787:0.454373)	NA	NA	NA	NA
	Unigene42228_All	Unigene2126_All	YN	0.00238782	0.00872616	0.27364	0.216152	1185	346.083	838.917	NA	5	3	2	NA	NA	0.00423896	3.20931:3.20931:1:1:1:1	0.477806(0.600503:0.442211:0.390704)	NA	NA	NA	NA
	Unigene37019_All	Unigene71689_All	YN	0.00747713	0.0273297	0.27359	0.0489678	897	224.936	672.064	NA	11	6	5	NA	NA	0.0124554	1.50173:1.50173:1:1:1:1	0.46767(0.575251:0.448161:0.379599)	NA	NA	NA	NA
	Unigene2221_All	Unigene18176_All	YN	0.00372085	0.0136085	0.27342	0.020449	2211	594.305	1616.7	NA	14	8	6	NA	NA	0.0063786	4.9682:4.9682:1:1:1:1	0.434452(0.506711:0.416779:0.379866)	NA	NA	NA	NA
	Unigene13587_All	Unigene12759_All	YN	0.000856645	0.00313362	0.273372	0.581377	1488	319.883	1168.12	NA	2	1	1	NA	NA	0.00134614	2:2:1:1:1:1	0.426075(0.538306:0.41129:0.328629)	NA	NA	NA	NA
	Unigene8915_All	Unigene21832_All	YN	0.00805993	0.0295221	0.273014	0.0293464	1116	242.754	873.246	NA	14	7	7	NA	NA	0.0127284	2.67739:2.67739:1:1:1:1	0.394566(0.467153:0.400243:0.316302)	NA	NA	NA	NA
	Unigene7119_All	Unigene23783_All	YN	0.00765602	0.0280936	0.272519	0.00315233	1638	431.613	1206.39	NA	21	11.8138	9.18623	NA	NA	0.0130413	3.34168:3.34168:1:1:1:1	0.435897(0.497253:0.403846:0.406593)	NA	NA	NA	NA
	Unigene36478_All	Unigene33818_All	YN	0.00241186	0.00885533	0.272362	0.203547	1587	341.143	1245.86	NA	6	3	3	NA	NA	0.00379696	1.28571:1.28571:1:1:1:1	0.434783(0.549149:0.42344:0.331758)	NA	NA	NA	NA
	Unigene24904_All	Unigene9005_All	YN	0.00886756	0.0325656	0.272298	0.0617583	693	125.666	567.334	NA	9	4	5	NA	NA	0.0131649	1.70055:1.70055:1:1:1:1	0.473118(0.504032:0.41129:0.504032)	NA	NA	NA	NA
	Unigene27447_All	Unigene13701_All	YN	0.00122368	0.0044974	0.272085	0.580904	1041	223.018	817.982	NA	2	1	1	NA	NA	0.00192502	2:2:1:1:1:1	0.394813(0.48415:0.35879:0.341499)	NA	NA	NA	NA
	Unigene9214_All	Unigene18415_All	YN	0.00630419	0.023179	0.271978	0.0321295	1104	306.688	797.312	NA	12	7	5	NA	NA	0.010992	8.18585:8.18585:1:1:1:1	0.462862(0.55163:0.514946:0.322011)	NA	NA	NA	NA
	Unigene35047_All	Unigene32472_All	YN	0.00773459	0.0284426	0.271937	0.00514987	1566	396.145	1169.86	NA	20	11	9	NA	NA	0.012973	2.35501:2.35501:1:1:1:1	0.436594(0.520833:0.317935:0.471014)	NA	NA	NA	NA
	Unigene299_All	Unigene520_All	YN	0.00646689	0.0237863	0.271875	0.00272783	1956	557.917	1398.08	NA	22	13	9	NA	NA	0.011407	4.91128:4.91128:1:1:1:1	0.424391(0.497191:0.36868:0.407303)	NA	NA	NA	NA
	Unigene40185_All	Unigene33541_All	YN	0.00571655	0.0210429	0.271661	0.128256	720	192.943	527.057	NA	7	4	3	NA	NA	0.00982366	2:2:1:1:1:1	0.481944(0.4625:0.56875:0.414583)	NA	NA	NA	NA
	Unigene40757_All	Unigene37533_All	YN	0.00268213	0.00987913	0.271494	0.214874	1053	305.945	747.055	NA	5	3	2	NA	NA	0.00477319	4.55536:4.55536:1:1:1:1	0.418519(0.456944:0.372222:0.426389)	NA	NA	NA	NA
	Unigene9809_All	Unigene18678_All	YN	0.00891948	0.032857	0.271464	0.00682743	1134	344.223	789.777	NA	18	11	7	NA	NA	0.0161856	4.79751:4.79751:1:1:1:1	0.492945(0.525132:0.473545:0.480159)	NA	NA	NA	NA
	Unigene1097_All	Unigene22335_All	YN	0.00605483	0.0223094	0.271403	0.122868	846	182.149	663.851	NA	8	4	4	NA	NA	0.00955454	1.32343:1.32343:1:1:1:1	0.4013(0.453901:0.39539:0.35461)	NA	NA	NA	NA
	Unigene39488_All	Unigene6731_All	YN	0.0101954	0.037571	0.271365	6.4774e-05	2283	603.931	1679.07	NA	39	22	17	NA	NA	0.0174372	2.80939:2.80939:1:1:1:1	0.455221(0.570773:0.408257:0.386632)	NA	NA	NA	NA
	Unigene9665_All	Unigene5214_All	YN	0.0119558	0.0440639	0.271328	0.00297169	1209	280.746	928.254	NA	23	12	11	NA	NA	0.0194117	3.85846:3.85846:1:1:1:1	0.405691(0.443902:0.47439:0.29878)	NA	NA	NA	NA
	Unigene19336_All	Unigene40467_All	YN	0.00857682	0.0316559	0.270939	0.0201098	963	259.298	703.702	NA	14	8	6	NA	NA	0.0147911	1.2313:1.2313:1:1:1:1	0.517653(0.604361:0.504673:0.443925)	NA	NA	NA	NA
	Unigene42476_All	Unigene40403_All	YN	0.00175369	0.00647509	0.270836	0.580565	726	155.106	570.894	NA	2	1	1	NA	NA	0.00276239	2:2:1:1:1:1	0.453228(0.608696:0.337945:0.413043)	NA	NA	NA	NA
	Unigene8005_All	Unigene70154_All	YN	0.00466984	0.0172681	0.270431	0.127608	879	234.317	644.683	NA	7	4	3	NA	NA	0.00802821	3.83298:3.83298:1:1:1:1	0.460182(0.510239:0.419795:0.450512)	NA	NA	NA	NA
	Unigene22788_All	Unigene19607_All	YN	0.00210161	0.00777174	0.270417	0.244157	606	129.339	476.661	NA	2	1	1	NA	NA	0.00331179	2:2:1:1:1:1	0.395215(0.529703:0.30198:0.35396)	NA	NA	NA	NA
	Unigene41856_All	Unigene21435_All	YN	0.00677169	0.025059	0.27023	0.0197563	1215	324.822	890.178	NA	14	8	6	NA	NA	0.0116607	2.87283:2.87283:1:1:1:1	0.434156(0.482716:0.446914:0.37284)	NA	NA	NA	NA
	Unigene39122_All	Unigene36148_All	YN	0.00431057	0.015956	0.270154	0.202406	888	190.024	697.976	NA	6	3	3	NA	NA	0.00680259	0.973005:0.973005:1:1:1:1	0.460586(0.476351:0.451014:0.454392)	NA	NA	NA	NA
	Unigene22638_All	Unigene82234_All	YN	0.00917867	0.0339973	0.269982	0.0138984	930	271.157	658.843	NA	15	9	6	NA	NA	0.016415	7.95572:7.95572:1:1:1:1	0.431373(0.473529:0.423529:0.397059)	NA	NA	NA	NA
	Unigene39088_All	Unigene3472_All	YN	0.00458911	0.0170441	0.269249	0.127331	894	237.902	656.098	NA	7	4	3	NA	NA	0.00790349	4.77563:4.77563:1:1:1:1	0.421141(0.513423:0.392617:0.357383)	NA	NA	NA	NA
	Unigene20474_All	Unigene8129_All	YN	0.0104764	0.0390674	0.268162	0.0285937	858	184.8	673.2	NA	14	7	7	NA	NA	0.0166345	1.72106:1.72106:1:1:1:1	0.456876(0.545455:0.472028:0.353147)	NA	NA	NA	NA
	Unigene35039_All	Unigene51028_All	YN	0.00327992	0.012245	0.267858	0.201664	1164	247.321	916.679	NA	6	3	3	NA	NA	0.00518479	1.20677:1.20677:1:1:1:1	0.458333(0.550258:0.466495:0.358247)	NA	NA	NA	NA
	Unigene20740_All	Unigene17658_All	YN	0.00338663	0.0126638	0.267426	0.0674637	1503	318.679	1184.32	NA	8	4	4	NA	NA	0.00535366	1.1888:1.1888:1:1:1:1	0.434447(0.533395:0.394249:0.375696)	NA	NA	NA	NA
	Unigene23288_All	Unigene37968_All	YN	0.00259046	0.00969827	0.267105	0.339214	981	207.559	773.441	NA	4	2	2	NA	NA	0.00409432	2:2:1:1:1:1	0.413725(0.463235:0.429412:0.348529)	NA	NA	NA	NA
	Unigene36529_All	Unigene36767_All	YN	0.00329661	0.012347	0.266998	0.12615	1239	326.717	912.283	NA	7	4	3	NA	NA	0.00568313	2:2:1:1:1:1	0.467829(0.52093:0.439535:0.443023)	NA	NA	NA	NA
	Unigene19538_All	Unigene25521_All	YN	0.00224809	0.00842022	0.266987	0.126304	1815	478.262	1336.74	NA	7	4	3	NA	NA	0.00387448	3.78637:3.78637:1:1:1:1	0.428375(0.475207:0.381818:0.428099)	NA	NA	NA	NA
	Unigene36424_All	Unigene21244_All	YN	0.00550613	0.0206252	0.266961	0.0763523	975	245.77	729.23	NA	9	5	4	NA	NA	0.00931723	3.96789:3.96789:1:1:1:1	0.412675(0.473054:0.371257:0.393713)	NA	NA	NA	NA
	Unigene26636_All	Unigene14434_All	YN	0.00726656	0.0272233	0.266924	0.0763299	741	187.32	553.68	NA	9	5	4	NA	NA	0.0123115	1.73842:1.73842:1:1:1:1	0.441532(0.578629:0.302419:0.443548)	NA	NA	NA	NA
	Unigene36395_All	Unigene33571_All	YN	0.00474684	0.0178062	0.266583	0.0505659	1188	342.133	845.867	NA	10	6	4	NA	NA	0.00850781	4.2106:4.2106:1:1:1:1	0.461279(0.477273:0.407828:0.498737)	NA	NA	NA	NA
	Unigene29984_All	Unigene28539_All	YN	0.00246222	0.00925141	0.266145	0.125962	1656	435.585	1220.41	NA	7	4	3	NA	NA	0.00424801	4.71759:4.71759:1:1:1:1	0.443442(0.517148:0.418773:0.394404)	NA	NA	NA	NA
	Unigene306_All	Unigene18016_All	YN	0.00649976	0.02443	0.266057	0.00272353	1863	625.733	1237.27	NA	23	15	8	NA	NA	0.0125221	9.0972:9.0972:1:1:1:1	0.443371(0.549919:0.362319:0.417874)	NA	NA	NA	NA
	Unigene28861_All	Unigene67_All	YN	0.00467657	0.0175959	0.265776	0.200609	816	172.502	643.498	NA	6	3	3	NA	NA	0.00740771	2:2:1:1:1:1	0.433824(0.466912:0.369485:0.465074)	NA	NA	NA	NA
	Unigene40824_All	Unigene22679_All	YN	0.00623536	0.0234634	0.265748	0.0690583	732	205.005	526.995	NA	8	4.72963	3.27037	NA	NA	0.0110603	4.06038:4.06038:1:1:1:1	0.45709(0.472015:0.436567:0.462687)	NA	NA	NA	NA
	Unigene833_All	Unigene2106_All	YN	0.00654658	0.0246694	0.265372	0.049862	861	247.238	613.762	NA	10	6	4	NA	NA	0.0117506	4.00571:4.00571:1:1:1:1	0.455407(0.5301:0.429766:0.406355)	NA	NA	NA	NA
	Unigene3659_All	Unigene30329_All	YN	0.0050088	0.0188916	0.265134	0.125617	816	215.052	600.948	NA	7	4	3	NA	NA	0.00866754	2:2:1:1:1:1	0.427511(0.455479:0.441781:0.385274)	NA	NA	NA	NA
	Unigene3882_All	Unigene25602_All	YN	0.00647091	0.0244267	0.264911	0.00206391	2097	544.581	1552.42	NA	23	13	10	NA	NA	0.0111339	4.54122:4.54122:1:1:1:1	0.441822(0.521459:0.351931:0.452074)	NA	NA	NA	NA
	Unigene42830_All	Unigene33797_All	YN	0.0052134	0.0196851	0.26484	0.0500301	1080	309.968	770.032	NA	10	6	4	NA	NA	0.00936689	3.83862:3.83862:1:1:1:1	0.469444(0.516667:0.422222:0.469444)	NA	NA	NA	NA
	Unigene8967_All	Unigene33253_All	YN	0.00429182	0.0162065	0.264822	0.00816653	2262	626.243	1635.76	NA	17	10	7	NA	NA	0.00759043	3.59366:3.59366:1:1:1:1	0.46397(0.547745:0.435013:0.409151)	NA	NA	NA	NA
	Unigene26567_All	Unigene23117_All	YN	0.0042917	0.0162135	0.2647	0.125382	951	249.974	701.026	NA	7	4	3	NA	NA	0.00742538	2.02873:2.02873:1:1:1:1	0.464322(0.547401:0.399083:0.446483)	NA	NA	NA	NA
	Unigene6812_All	Unigene2151_All	YN	0.00474752	0.0179551	0.26441	0.0758389	1128	282.698	845.302	NA	9	5	4	NA	NA	0.0080576	4.5412:4.5412:1:1:1:1	0.438834(0.506158:0.438424:0.371921)	NA	NA	NA	NA
	Unigene5260_All	Unigene16537_All	YN	0.0078804	0.0298317	0.264162	0.0461158	843	205.155	637.845	NA	11	6	5	NA	NA	0.0132225	1.33862:1.33862:1:1:1:1	0.418618(0.444816:0.454849:0.356187)	NA	NA	NA	NA
	Unigene10022_All	Unigene3360_All	YN	0.00383586	0.0145386	0.26384	0.200009	993	208.643	784.357	NA	6	3	3	NA	NA	0.00608465	2.13043:2.13043:1:1:1:1	0.413394(0.47281:0.429003:0.338369)	NA	NA	NA	NA
	Unigene34967_All	Unigene28927_All	YN	0.00496384	0.0188168	0.263798	0.0463793	1335	324.09	1010.91	NA	11	6	5	NA	NA	0.00832685	3.66858:3.66858:1:1:1:1	0.4603(0.538202:0.48427:0.358427)	NA	NA	NA	NA
	Unigene21639_All	Unigene17663_All	YN	0.0080527	0.0305285	0.263777	0.035211	735	235.516	499.484	NA	11	7	4	NA	NA	0.0152546	7.61731:7.61731:1:1:1:1	0.429932(0.487755:0.338776:0.463265)	NA	NA	NA	NA
	Unigene29479_All	Unigene16507_All	YN	0.00344642	0.013071	0.263669	0.124876	1182	309.262	872.738	NA	7	4	3	NA	NA	0.00596462	3.60072:3.60072:1:1:1:1	0.452743(0.548101:0.435443:0.374684)	NA	NA	NA	NA
	Unigene39554_All	Unigene18080_All	YN	0.00344575	0.0130689	0.26366	0.188092	864	213.734	650.266	NA	5	2.76457	2.23543	NA	NA	0.0058263	2:2:1:1:1:1	0.441456(0.458861:0.393987:0.471519)	NA	NA	NA	NA
	Unigene5089_All	Unigene9885_All	YN	0.00181853	0.00690754	0.263267	0.337198	1392	290.874	1101.13	NA	4	2	2	NA	NA	0.00288193	2:2:1:1:1:1	0.409853(0.509434:0.397275:0.322851)	NA	NA	NA	NA
	Unigene1026_All	Unigene1746_All	YN	0.0124099	0.0471475	0.263214	9.30467e-06	2133	570.819	1562.18	NA	45	25.7897	19.2103	NA	NA	0.0217061	4.72184:4.72184:1:1:1:1	0.463901(0.540084:0.466948:0.384669)	NA	NA	NA	NA
	Unigene2914_All	Unigene3342_All	YN	0.00643889	0.024479	0.263037	0.0115823	1467	375.121	1091.88	NA	16	9	7	NA	NA	0.0110519	2.79591:2.79591:1:1:1:1	0.429(0.488:0.391:0.408)	NA	NA	NA	NA
	Unigene20828_All	Unigene3424_All	YN	0.0101362	0.0385516	0.262926	0.0184998	810	213.514	596.486	NA	14	8	6	NA	NA	0.0176264	3.51674:3.51674:1:1:1:1	0.454657(0.501838:0.40625:0.455882)	NA	NA	NA	NA
	Unigene40576_All	Unigene36810_All	YN	0.00293233	0.0111562	0.262844	0.199574	1296	270.914	1025.09	NA	6	3	3	NA	NA	0.00465144	0.96909:0.96909:1:1:1:1	0.450617(0.516204:0.443287:0.392361)	NA	NA	NA	NA
	Unigene18897_All	Unigene26742_All	YN	0.00651485	0.0247903	0.262798	0.0126761	1059	287.871	771.129	NA	12	7	5	NA	NA	0.0114827	5.56821:5.56821:1:1:1:1	0.454674(0.507082:0.407932:0.449008)	NA	NA	NA	NA
	Unigene38791_All	Unigene18985_All	YN	0.00730669	0.0278124	0.262713	0.0176492	1257	294.111	962.889	NA	15	8	7	NA	NA	0.0121046	2.34655:2.34655:1:1:1:1	0.423132(0.492457:0.377155:0.399784)	NA	NA	NA	NA
	Unigene19008_All	Unigene15435_All	YN	0.00419836	0.0159987	0.262418	0.0488482	1335	379.044	955.956	NA	10	6	4	NA	NA	0.00754882	5.81612:5.81612:1:1:1:1	0.468984(0.524664:0.382287:0.5)	NA	NA	NA	NA
	Unigene40863_All	Unigene26419_All	YN	0.00485757	0.0185211	0.262272	0.0817697	894	274.144	619.856	NA	8	5	3	NA	NA	0.00904749	4.14544:4.14544:1:1:1:1	0.436242(0.491611:0.322148:0.494966)	NA	NA	NA	NA
	Unigene39881_All	Unigene19005_All	YN	0.00842031	0.0321139	0.262202	0.0346935	702	224.2	477.8	NA	11	7	4	NA	NA	0.0159874	5.51739:5.51739:1:1:1:1	0.513085(0.557851:0.510331:0.471074)	NA	NA	NA	NA
	Unigene20244_All	Unigene6415_All	YN	0.0102101	0.0389658	0.262027	0.0129504	831	239.204	591.796	NA	15	9	6	NA	NA	0.0184875	2.84785:2.84785:1:1:1:1	0.507794(0.523381:0.505396:0.494604)	NA	NA	NA	NA
	Unigene6928_All	Unigene3927_All	YN	0.00615302	0.0234925	0.261915	0.00430824	2109	477.074	1631.93	NA	21	11	10	NA	NA	0.0100753	1.60902:1.60902:1:1:1:1	0.4578(0.523471:0.423898:0.426031)	NA	NA	NA	NA
	Unigene7894_All	Unigene36712_All	YN	0.00261684	0.010003	0.261605	0.209114	1068	302.178	765.822	NA	5	3	2	NA	NA	0.00470667	4.04541:4.04541:1:1:1:1	0.441417(0.56267:0.354223:0.407357)	NA	NA	NA	NA
	Unigene40486_All	Unigene6649_All	YN	0.00374219	0.014323	0.261271	0.0748857	1425	353.348	1071.65	NA	9	5	4	NA	NA	0.00636585	3.69264:3.69264:1:1:1:1	0.431228(0.555789:0.381053:0.356842)	NA	NA	NA	NA
	Unigene38264_All	Unigene33921_All	YN	0.0096461	0.0369526	0.26104	0.00301974	1275	334.565	940.435	NA	21	12	9	NA	NA	0.0168114	6.58124:6.58124:1:1:1:1	0.436434(0.484884:0.484884:0.339535)	NA	NA	NA	NA
	Unigene19345_All	Unigene8997_All	YN	0.00396982	0.0152401	0.260486	0.0682389	1395	313.016	1081.98	NA	9	4.71639	4.28361	NA	NA	0.00649869	1.98075:1.98075:1:1:1:1	0.448179(0.516807:0.42437:0.403361)	NA	NA	NA	NA
	Unigene25866_All	Unigene33961_All	YN	0.00585741	0.0225013	0.260314	0.00703288	1824	452.832	1371.17	NA	18	10	8	NA	NA	0.00998947	2.17033:2.17033:1:1:1:1	0.416667(0.486842:0.354441:0.408717)	NA	NA	NA	NA
	Unigene30957_All	Unigene10330_All	YN	0.0030217	0.011608	0.260311	0.335828	837	173.737	663.263	NA	4	2	2	NA	NA	0.00480398	2.02322:2.02322:1:1:1:1	0.409605(0.510169:0.401695:0.316949)	NA	NA	NA	NA
	Unigene28359_All	Unigene33093_All	YN	0.00377036	0.0144906	0.260193	0.123464	1077	279.317	797.683	NA	7	4	3	NA	NA	0.00655063	2.51562:2.51562:1:1:1:1	0.440568(0.555556:0.414729:0.351421)	NA	NA	NA	NA
	Unigene9424_All	Unigene16440_All	YN	0.00553582	0.0212879	0.260045	0.0203172	1290	383.169	906.831	NA	13	8	5	NA	NA	0.0102147	6.99966:6.99966:1:1:1:1	0.471871(0.510549:0.53481:0.370253)	NA	NA	NA	NA
	Unigene20809_All	Unigene22321_All	YN	0.00342281	0.0132438	0.258446	0.334832	738	152.351	585.649	NA	4	2	2	NA	NA	0.00545024	2:2:1:1:1:1	0.424837(0.509804:0.380392:0.384314)	NA	NA	NA	NA
	Unigene26720_All	Unigene15909_All	YN	0.0053132	0.020565	0.258361	0.0202246	1053	296.952	756.048	NA	10	6	4	NA	NA	0.00961431	5.65113:5.65113:1:1:1:1	0.44213(0.536111:0.373611:0.416667)	NA	NA	NA	NA
	Unigene19476_All	Unigene16302_All	YN	0.00357639	0.0138437	0.258341	0.0196646	1986	583.78	1402.22	NA	13	8	5	NA	NA	0.00659444	6.75004:6.75004:1:1:1:1	0.451662(0.573263:0.392749:0.388973)	NA	NA	NA	NA
	Unigene804_All	Unigene7735_All	YN	0.00637401	0.0247021	0.258035	0.0620221	795	164.611	630.389	NA	8	4	4	NA	NA	0.010169	2:2:1:1:1:1	0.419497(0.518868:0.358491:0.381132)	NA	NA	NA	NA
	Unigene6739_All	Unigene27575_All	YN	0.00797998	0.0309484	0.257848	0.00518181	1245	362.814	882.186	NA	18	11	7	NA	NA	0.0146734	7.88282:7.88282:1:1:1:1	0.456731(0.558894:0.44351:0.367788)	NA	NA	NA	NA
	Unigene60980_All	Unigene4091_All	YN	0.022251	0.0863234	0.257763	0.000634266	918	187.679	730.321	NA	31	15	16	NA	NA	0.0353501	2.71883:2.71883:1:1:1:1	0.406623(0.483713:0.413681:0.322476)	NA	NA	NA	NA
	Unigene21606_All	Unigene15958_All	YN	0.00186676	0.0072475	0.257573	0.574525	675	138.646	536.354	NA	2	1	1	NA	NA	0.00297198	2:2:1:1:1:1	0.39727(0.532328:0.368534:0.290948)	NA	NA	NA	NA
	Unigene51658_All	Unigene18986_All	YN	0.00410931	0.0159834	0.257099	0.0471813	1356	379.404	976.596	NA	10	6	4	NA	NA	0.00743164	5.78064:5.78064:1:1:1:1	0.452065(0.553097:0.409292:0.393805)	NA	NA	NA	NA
	Unigene2882_All	Unigene401_All	YN	0.00516803	0.0201275	0.256765	0.0732841	1029	251.81	777.19	NA	9	5	4	NA	NA	0.00882881	2:2:1:1:1:1	0.431149(0.498575:0.403134:0.391738)	NA	NA	NA	NA
	Unigene1932_All	Unigene7759_All	YN	0.00431051	0.0167929	0.256687	0.121853	939	241.023	697.977	NA	7	4	3	NA	NA	0.00751448	2.11772:2.11772:1:1:1:1	0.467519(0.525559:0.463259:0.413738)	NA	NA	NA	NA
	Unigene10016_All	Unigene34395_All	YN	0.00527757	0.0205975	0.256224	0.046925	1056	295.315	760.685	NA	10	6	4	NA	NA	0.00956187	3.98366:3.98366:1:1:1:1	0.429379(0.54096:0.353107:0.394068)	NA	NA	NA	NA
	Unigene25476_All	Unigene34887_All	YN	0.00934001	0.0364774	0.256049	0.0443353	708	168.685	539.315	NA	11	6	5	NA	NA	0.0158056	2.16602:2.16602:1:1:1:1	0.397829(0.517241:0.302682:0.373563)	NA	NA	NA	NA
	Unigene2017_All	Unigene17282_All	YN	0.00140681	0.00549943	0.25581	0.573509	894	182.504	711.496	NA	2	1	1	NA	NA	0.00224229	2:2:1:1:1:1	0.402685(0.503356:0.36745:0.337248)	NA	NA	NA	NA
	Unigene20703_All	Unigene20160_All	YN	0.0039175	0.0153237	0.25565	0.0784812	1098	329.916	768.084	NA	8	5	3	NA	NA	0.00734472	7.11137:7.11137:1:1:1:1	0.424051(0.512658:0.378481:0.381013)	NA	NA	NA	NA
	Unigene38045_All	Unigene16542_All	YN	0.0045607	0.0178619	0.255331	0.0601259	1107	226.735	880.265	NA	8	4	4	NA	NA	0.00728504	2:2:1:1:1:1	0.425393(0.534031:0.424084:0.318063)	NA	NA	NA	NA
	Unigene24182_All	Unigene20850_All	YN	0.00846779	0.0332053	0.255013	0.0445815	780	186.156	593.844	NA	11	6	5	NA	NA	0.0143717	1.52848:1.52848:1:1:1:1	0.462287(0.523723:0.485401:0.377737)	NA	NA	NA	NA
	Unigene4360_All	Unigene23534_All	YN	0.00779776	0.0306084	0.254759	0.0468822	717	201.231	515.769	NA	10	6	4	NA	NA	0.0141997	3.45185:3.45185:1:1:1:1	0.422131(0.47541:0.331967:0.459016)	NA	NA	NA	NA
	Unigene19442_All	Unigene5429_All	YN	0.00302703	0.0118864	0.254664	0.0465284	1833	508.79	1324.21	NA	10	6	4	NA	NA	0.00548614	3.71122:3.71122:1:1:1:1	0.445079(0.514682:0.372757:0.447798)	NA	NA	NA	NA
	Unigene38481_All	Unigene35233_All	YN	0.00608051	0.0238903	0.254518	0.0600552	831	170.341	660.659	NA	8	4	4	NA	NA	0.0097312	1.50764:1.50764:1:1:1:1	0.420264(0.473022:0.330935:0.456835)	NA	NA	NA	NA
	Unigene35592_All	Unigene25535_All	YN	0.0126749	0.0498243	0.254391	0.00191689	1104	228.552	875.448	NA	22	11	11	NA	NA	0.0203656	0.705655:0.705655:1:1:1:1	0.452575(0.439024:0.407859:0.51084)	NA	NA	NA	NA
	Unigene23538_All	Unigene18465_All	YN	0.00565644	0.0223145	0.253487	0.0464335	984	274.076	709.924	NA	10	6	4	NA	NA	0.0102962	4.40307:4.40307:1:1:1:1	0.441504(0.502786:0.437326:0.384401)	NA	NA	NA	NA
	Unigene3863_All	Unigene20405_All	YN	0.00432708	0.0170868	0.25324	0.332242	582	118.387	463.613	NA	4	2	2	NA	NA	0.0069226	1.58261:1.58261:1:1:1:1	0.460481(0.515464:0.443299:0.42268)	NA	NA	NA	NA
	Unigene35467_All	Unigene39677_All	YN	0.00360168	0.0142287	0.253128	0.120442	1119	283.797	835.203	NA	7	4	3	NA	NA	0.00629687	3.97932:3.97932:1:1:1:1	0.415794(0.468586:0.426702:0.352094)	NA	NA	NA	NA
	Unigene38542_All	Unigene21385_All	YN	0.00825186	0.0326233	0.252944	0.0427325	687	184.384	502.616	NA	10	5.87925	4.12075	NA	NA	0.0147929	5.46371:5.46371:1:1:1:1	0.425764(0.475983:0.412664:0.388646)	NA	NA	NA	NA
	Unigene21527_All	Unigene19045_All	YN	0.00319832	0.0126641	0.25255	0.0582456	1572	318.527	1253.47	NA	8	4	4	NA	NA	0.00511634	3.48678:3.48678:1:1:1:1	0.408621(0.448276:0.376724:0.400862)	NA	NA	NA	NA
	Unigene20995_All	Unigene18531_All	YN	0.00130204	0.00516427	0.252124	0.571709	963	194.306	768.694	NA	2	1	1	NA	NA	0.00208132	2:2:1:1:1:1	0.426096(0.518349:0.429664:0.330275)	NA	NA	NA	NA
	Unigene11538_All	Unigene1512_All	YN	0.00612863	0.0243395	0.251798	0.0440031	1071	251.731	819.269	NA	11	6	5	NA	NA	0.0104089	2.11827:2.11827:1:1:1:1	0.439551(0.509067:0.395078:0.414508)	NA	NA	NA	NA
	Unigene14356_All	Unigene1972_All	YN	0.0135249	0.0537206	0.251764	0.00421708	810	213.119	596.881	NA	19	11	8	NA	NA	0.0241008	2.79419:2.79419:1:1:1:1	0.417901(0.47963:0.366667:0.407407)	NA	NA	NA	NA
	Unigene7617_All	Unigene23687_All	YN	0.00647212	0.0257234	0.251604	0.00678231	1482	395.68	1086.32	NA	17	10	7	NA	NA	0.011612	2.50022:2.50022:1:1:1:1	0.428571(0.518797:0.37688:0.390038)	NA	NA	NA	NA
	Unigene74408_All	Unigene25825_All	YN	0.00447477	0.0177963	0.251443	0.0458186	1239	342.322	896.678	NA	10	6	4	NA	NA	0.00815538	4.39405:4.39405:1:1:1:1	0.428457(0.492806:0.384892:0.407674)	NA	NA	NA	NA
	Unigene3572_All	Unigene9956_All	YN	0.00427803	0.0170161	0.25141	0.0277591	1590	417.632	1172.37	NA	12	7	5	NA	NA	0.00762384	3.27362:3.27362:1:1:1:1	0.43825(0.517153:0.43482:0.362779)	NA	NA	NA	NA
	Unigene2509_All	Unigene26772_All	YN	0.00681102	0.0270943	0.251382	0.00905929	1335	302.513	1032.49	NA	15	8	7	NA	NA	0.0114072	2.59506:2.59506:1:1:1:1	0.400641(0.464744:0.386752:0.350427)	NA	NA	NA	NA
	Unigene35855_All	Unigene29164_All	YN	0.0086546	0.0344771	0.251025	0.0182135	819	237.663	581.337	NA	13	8	5	NA	NA	0.0161479	4.92004:4.92004:1:1:1:1	0.449879(0.543478:0.40942:0.396739)	NA	NA	NA	NA
	Unigene38558_All	Unigene30637_All	YN	0.0154072	0.0614751	0.250625	0.000568625	987	251.945	735.055	NA	26	14.7942	11.2058	NA	NA	0.0271667	3.40696:3.40696:1:1:1:1	0.432731(0.52259:0.337349:0.438253)	NA	NA	NA	NA
	Unigene41823_All	Unigene24560_All	YN	0.00344396	0.013743	0.250598	0.330974	729	146.94	582.06	NA	4	2	2	NA	NA	0.00551987	2:2:1:1:1:1	0.394376(0.481481:0.349794:0.351852)	NA	NA	NA	NA
	Unigene23511_All	Unigene20325_All	YN	0.00342808	0.0137118	0.250008	0.330609	732	147.197	584.803	NA	4	2	2	NA	NA	0.00549602	1.8292:1.8292:1:1:1:1	0.432927(0.518293:0.426829:0.353659)	NA	NA	NA	NA
	Unigene41020_All	Unigene16914_All	YN	0.00419965	0.0168035	0.249928	0.0274877	1617	422.785	1194.22	NA	12	7	5	NA	NA	0.00749507	4.75325:4.75325:1:1:1:1	0.401979(0.454545:0.353432:0.397959)	NA	NA	NA	NA
	Unigene40440_All	Unigene40465_All	YN	0.00416895	0.0167037	0.249582	0.202672	663	181.883	481.117	NA	5	3	2	NA	NA	0.00760766	2.05946:2.05946:1:1:1:1	0.446456(0.450226:0.38914:0.5)	NA	NA	NA	NA
	Unigene25610_All	Unigene23233_All	YN	0.0117573	0.0471113	0.249565	0.000725224	1191	329.689	861.311	NA	25	14.9587	10.0413	NA	NA	0.0215439	3.89445:3.89445:1:1:1:1	0.446667(0.48625:0.49625:0.3575)	NA	NA	NA	NA
	Unigene1793_All	Unigene19041_All	YN	0.00727061	0.0291457	0.249458	0.00406971	1491	385.253	1105.75	NA	19	11	8	NA	NA	0.0129228	2.52039:2.52039:1:1:1:1	0.470942(0.486974:0.436874:0.488978)	NA	NA	NA	NA
	Unigene35710_All	Unigene15420_All	YN	0.0111767	0.0448714	0.249084	0.0110619	750	208.812	541.188	NA	15	9	6	NA	NA	0.0205579	3.49919:3.49919:1:1:1:1	0.449333(0.488:0.362:0.498)	NA	NA	NA	NA
	Unigene42165_All	Unigene19708_All	YN	0.00526948	0.0211565	0.249071	0.0713344	1002	239.683	762.317	NA	9	5	4	NA	NA	0.00906973	2:2:1:1:1:1	0.402077(0.449555:0.326409:0.430267)	NA	NA	NA	NA
	Unigene17712_All	Unigene21522_All	YN	0.00456937	0.018368	0.248768	0.118815	879	220.448	658.552	NA	7	4	3	NA	NA	0.00802998	1.98656:1.98656:1:1:1:1	0.425509(0.524116:0.348875:0.403537)	NA	NA	NA	NA
	Unigene24093_All	Unigene22807_All	YN	0.00455613	0.0183491	0.248302	0.118858	882	221.272	660.728	NA	7	4	3	NA	NA	0.00801644	3.82086:3.82086:1:1:1:1	0.419063(0.423323:0.480831:0.353035)	NA	NA	NA	NA
	Unigene36504_All	Unigene35966_All	YN	0.00622941	0.0251685	0.247508	0.00529358	1413	445.306	967.694	NA	17	11	6	NA	NA	0.0121981	6.81973:6.81973:1:1:1:1	0.473815(0.536093:0.437367:0.447983)	NA	NA	NA	NA
	Unigene42864_All	Unigene38474_All	YN	0.00394938	0.0160187	0.246548	0.118101	1014	252.385	761.615	NA	7	4	3	NA	NA	0.00695343	2:2:1:1:1:1	0.456114(0.507396:0.443787:0.41716)	NA	NA	NA	NA
	Unigene9500_All	Unigene26886_All	YN	0.00248891	0.010109	0.246208	0.200914	1104	299.052	804.948	NA	5	3	2	NA	NA	0.00455303	2.4511:2.4511:1:1:1:1	0.431159(0.471467:0.387228:0.434783)	NA	NA	NA	NA
	Unigene21413_All	Unigene71503_All	YN	0.0105064	0.0427412	0.245815	0.0264055	648	168.487	479.513	NA	12	7	5	NA	NA	0.0188878	3.0114:3.0114:1:1:1:1	0.438356(0.518265:0.442922:0.353881)	NA	NA	NA	NA
	Unigene9465_All	Unigene20800_All	YN	0.00936783	0.0381364	0.24564	0.017362	753	215.894	537.106	NA	13	8	5	NA	NA	0.0176161	3.83239:3.83239:1:1:1:1	0.440239(0.416335:0.492032:0.412351)	NA	NA	NA	NA
	Unigene30344_All	Unigene12701_All	YN	0.00706472	0.0287784	0.245487	0.00286584	1635	355.029	1279.97	NA	19	10	9	NA	NA	0.0117797	1.72293:1.72293:1:1:1:1	0.470018(0.609347:0.483245:0.31746)	NA	NA	NA	NA
	Unigene19362_All	Unigene25966_All	YN	0.00611842	0.0249743	0.244989	0.0222698	1065	244.426	820.574	NA	11	6	5	NA	NA	0.010446	1.20638:1.20638:1:1:1:1	0.465258(0.556338:0.353521:0.485915)	NA	NA	NA	NA
	Unigene42731_All	Unigene26726_All	YN	0.00431852	0.0176285	0.244973	0.0441123	1275	345.551	929.449	NA	10	6	4	NA	NA	0.00792581	5.02845:5.02845:1:1:1:1	0.436471(0.495294:0.422353:0.391765)	NA	NA	NA	NA
	Unigene36710_All	Unigene8815_All	YN	0.00548568	0.0224073	0.244816	0.044125	1005	273.06	731.94	NA	10	6	4	NA	NA	0.0100833	2.42868:2.42868:1:1:1:1	0.485572(0.59403:0.467164:0.395522)	NA	NA	NA	NA
	Unigene36497_All	Unigene20647_All	YN	0.00284008	0.0116236	0.244339	0.199996	966	260.417	705.583	NA	5	3	2	NA	NA	0.00520796	1.99467:1.99467:1:1:1:1	0.457039(0.492236:0.439441:0.439441)	NA	NA	NA	NA
	Unigene32975_All	Unigene1110_All	YN	0.002689	0.0110055	0.244332	0.199991	1020	274.896	745.104	NA	5	3	2	NA	NA	0.00493035	2.39066:2.39066:1:1:1:1	0.435788(0.531161:0.42068:0.355524)	NA	NA	NA	NA
	Unigene53102_All	Unigene40439_All	YN	0.00575452	0.0235618	0.244231	0.117271	696	172.668	523.332	NA	7	4	3	NA	NA	0.0101723	2.70109:2.70109:1:1:1:1	0.438937(0.484914:0.478448:0.353448)	NA	NA	NA	NA
	Unigene9359_All	Unigene18221_All	YN	0.0119935	0.0491741	0.2439	0.00492775	864	191.337	672.663	NA	17	9	8	NA	NA	0.0202273	1.88606:1.88606:1:1:1:1	0.420139(0.409722:0.425347:0.425347)	NA	NA	NA	NA
	Unigene36553_All	Unigene34001_All	YN	0.0045434	0.0186446	0.243684	0.00630742	2091	545.581	1545.42	NA	17	10	7	NA	NA	0.00822268	5.25334:5.25334:1:1:1:1	0.427889(0.497851:0.440544:0.345272)	NA	NA	NA	NA
	Unigene8029_All	Unigene20572_All	YN	0.00582775	0.0239419	0.243412	0.0284962	987	297.428	689.572	NA	11	7	4	NA	NA	0.0112864	5.24587:5.24587:1:1:1:1	0.448835(0.486322:0.420973:0.43921)	NA	NA	NA	NA
	Unigene9033_All	Unigene21151_All	YN	0.00336463	0.0138271	0.243335	0.0947582	1113	219.369	893.631	NA	6	3	3	NA	NA	0.00542675	2:2:1:1:1:1	0.415993(0.490566:0.369272:0.38814)	NA	NA	NA	NA
	Unigene21389_All	Unigene16159_All	YN	0.00417645	0.0171753	0.243166	0.0170072	1674	472.955	1201.05	NA	13	8	5	NA	NA	0.00784903	8.30517:8.30517:1:1:1:1	0.441159(0.517921:0.413978:0.391577)	NA	NA	NA	NA
	Unigene1293_All	Unigene33977_All	YN	0.00383991	0.0158628	0.24207	0.0261619	1752	446.097	1305.9	NA	12	7	5	NA	NA	0.00690121	2:2:1:1:1:1	0.466155(0.536689:0.408703:0.453072)	NA	NA	NA	NA
	Unigene37894_All	Unigene25242_All	YN	0.0103805	0.0429183	0.241866	0.000150135	1698	436.734	1261.27	NA	31	18	13	NA	NA	0.0187494	4.97702:4.97702:1:1:1:1	0.438596(0.526316:0.414912:0.374561)	NA	NA	NA	NA
	Unigene33054_All	Unigene15703_All	YN	0.00666107	0.0275439	0.241835	0.000437873	2103	594.477	1508.52	NA	26	16	10	NA	NA	0.0125642	10.9465:10.9465:1:1:1:1	0.417737(0.525678:0.386591:0.340942)	NA	NA	NA	NA
	Unigene38014_All	Unigene3858_All	YN	0.00385891	0.0159618	0.241759	0.0366977	1356	316.676	1039.32	NA	9	5	4	NA	NA	0.00668537	1.68315:1.68315:1:1:1:1	0.426309(0.496901:0.402893:0.379132)	NA	NA	NA	NA
	Unigene17047_All	Unigene17798_All	YN	0.00702313	0.0290608	0.24167	0.0216486	927	211.701	715.299	NA	11	6	5	NA	NA	0.0120559	1.31814:1.31814:1:1:1:1	0.463675(0.512821:0.427885:0.450321)	NA	NA	NA	NA
	Unigene9320_All	Unigene20103_All	YN	0.00928641	0.0384815	0.241321	0.0279957	621	187.061	433.939	NA	11	7	4	NA	NA	0.0180807	5.38333:5.38333:1:1:1:1	0.41868(0.492754:0.326087:0.437198)	NA	NA	NA	NA
	Unigene5029_All	Unigene15491_All	YN	0.00392181	0.0162566	0.241244	0.0165891	1776	497.461	1278.54	NA	13	8	5	NA	NA	0.0073768	5.80991:5.80991:1:1:1:1	0.431869(0.476351:0.429054:0.390203)	NA	NA	NA	NA
	Unigene28156_All	Unigene16235_All	YN	0.00256917	0.0106565	0.241089	0.172339	969	189.205	779.795	NA	4	2	2	NA	NA	0.00414829	2:2:1:1:1:1	0.392929(0.493939:0.375758:0.309091)	NA	NA	NA	NA
	Unigene6618_All	Unigene34008_All	YN	0.00220089	0.00913914	0.24082	0.116526	1806	440.901	1365.1	NA	7	4	3	NA	NA	0.00389473	1.94136:1.94136:1:1:1:1	0.458472(0.512458:0.421927:0.44103)	NA	NA	NA	NA
	Unigene12011_All	Unigene33608_All	YN	0.00589753	0.0245296	0.240425	0.00405153	1101	249.81	851.19	NA	11	6	5	NA	NA	0.010125	2.3631:2.3631:1:1:1:1	0.398274(0.440054:0.366485:0.388283)	NA	NA	NA	NA
	Unigene27180_All	Unigene36863_All	YN	0.00682937	0.028453	0.240023	0.00516017	1353	323.266	1029.73	NA	16	9	7	NA	NA	0.0119958	2.16231:2.16231:1:1:1:1	0.427215(0.473629:0.429325:0.378692)	NA	NA	NA	NA
	Unigene40969_All	Unigene36561_All	YN	0.003652	0.0152156	0.240017	0.0919155	1023	199.239	823.761	NA	6	3	3	NA	NA	0.00590411	1.34624:1.34624:1:1:1:1	0.40958(0.472141:0.398827:0.357771)	NA	NA	NA	NA
	Unigene40727_All	Unigene7283_All	YN	0.00342635	0.0143255	0.239179	0.0912243	1089	211.424	877.576	NA	6	3	3	NA	NA	0.00554236	0.985519:0.985519:1:1:1:1	0.436421(0.517711:0.422343:0.36921)	NA	NA	NA	NA
	Unigene36228_All	Unigene3222_All	YN	0.00562856	0.0235658	0.238845	0.115715	708	172.974	535.026	NA	7	4	3	NA	NA	0.0100109	1.96762:1.96762:1:1:1:1	0.439972(0.480932:0.425847:0.413136)	NA	NA	NA	NA
	Unigene29643_All	Unigene20889_All	YN	0.00316582	0.0132592	0.238765	0.0243611	2280	380.615	1899.39	NA	11	5	6	NA	NA	0.00485077	0.374767:0.374767:1:1:1:1	0.427771(0.503881:0.437257:0.342173)	NA	NA	NA	NA
	Unigene43757_All	Unigene41_All	YN	0.00678368	0.0284292	0.238616	0.0163902	1029	288.598	740.402	NA	13	8	5	NA	NA	0.0128545	10.7327:10.7327:1:1:1:1	0.417326(0.526385:0.407652:0.317942)	NA	NA	NA	NA
	Unigene32606_All	Unigene25838_All	YN	0.00508121	0.0212985	0.238571	0.115497	783	190.588	592.412	NA	7	4	3	NA	NA	0.00902861	2:2:1:1:1:1	0.430925(0.496198:0.406844:0.389734)	NA	NA	NA	NA
	Unigene29330_All	Unigene29975_All	YN	0.00724857	0.0303935	0.23849	0.00176038	1485	324.627	1160.37	NA	18	9.62959	8.37041	NA	NA	0.0123082	1.79287:1.79287:1:1:1:1	0.416164(0.466801:0.39839:0.3833)	NA	NA	NA	NA
	Unigene42024_All	Unigene25391_All	YN	0.00617431	0.0259051	0.238344	0.0626007	645	157.092	487.908	NA	7	4	3	NA	NA	0.0109798	2:2:1:1:1:1	0.417829(0.513953:0.27907:0.460465)	NA	NA	NA	NA
	Unigene19501_All	Unigene715_All	YN	0.0038534	0.0161871	0.238054	0.0215972	1416	375.258	1040.74	NA	10	6	4	NA	NA	0.00712198	3.64527:3.64527:1:1:1:1	0.435381(0.509534:0.412076:0.384534)	NA	NA	NA	NA
	Unigene69918_All	Unigene16077_All	YN	0.00759985	0.0319648	0.237757	0.030879	699	157.073	541.927	NA	9	4.90263	4.09737	NA	NA	0.0130749	0.689849:0.689849:1:1:1:1	0.399089(0.423828:0.375:0.398438)	NA	NA	NA	NA
	Unigene18192_All	Unigene14973_All	YN	0.00459767	0.0193511	0.237592	0.0629962	864	209.481	654.519	NA	7	4	3	NA	NA	0.00817472	1.82962:1.82962:1:1:1:1	0.451968(0.477431:0.355903:0.522569)	NA	NA	NA	NA
	Unigene22042_All	Unigene23322_All	YN	0.0108389	0.045694	0.237206	0.00671051	831	180.465	650.535	NA	15	8	7	NA	NA	0.0184082	0.777034:0.777034:1:1:1:1	0.441035(0.563177:0.438628:0.3213)	NA	NA	NA	NA
	Unigene31316_All	Unigene5161_All	YN	0.0032298	0.0136299	0.236965	0.0622837	1227	296.148	930.852	NA	7	4	3	NA	NA	0.00573995	2:2:1:1:1:1	0.448655(0.479218:0.427873:0.438875)	NA	NA	NA	NA
	Unigene20131_All	Unigene6763_All	YN	0.00429405	0.0181259	0.236902	0.0624209	924	223.357	700.643	NA	7	4	3	NA	NA	0.00763758	2:2:1:1:1:1	0.509199(0.519481:0.449675:0.558442)	NA	NA	NA	NA
	Unigene58783_All	Unigene22874_All	YN	0.0073508	0.0310305	0.23689	0.00482075	1254	296.977	957.023	NA	16	9	7	NA	NA	0.0129587	2.19913:2.19913:1:1:1:1	0.455343(0.507177:0.489234:0.369617)	NA	NA	NA	NA
	Unigene24122_All	Unigene34784_All	YN	0.00810145	0.0342304	0.236674	0.0198985	801	179.993	621.007	NA	11	6	5	NA	NA	0.0139729	1.28404:1.28404:1:1:1:1	0.449943(0.486348:0.452218:0.411263)	NA	NA	NA	NA
	Unigene23680_All	Unigene6676_All	YN	0.0191637	0.0810178	0.236537	3.01211e-06	1302	339.616	962.384	NA	44	25.7964	18.2036	NA	NA	0.0352979	2.87552:2.87552:1:1:1:1	0.436088(0.462924:0.433263:0.412076)	NA	NA	NA	NA
	Unigene6286_All	Unigene4592_All	YN	0.0108981	0.0460963	0.236421	0.00949295	756	201.406	554.594	NA	15	9	6	NA	NA	0.0202753	1.8356:1.8356:1:1:1:1	0.480545(0.515564:0.447471:0.478599)	NA	NA	NA	NA
	Unigene3907_All	Unigene26250_All	YN	0.00455438	0.0192694	0.236353	0.0254992	1470	368.82	1101.18	NA	12	7	5	NA	NA	0.00824635	2.37403:2.37403:1:1:1:1	0.403042(0.495247:0.36692:0.346958)	NA	NA	NA	NA
	Unigene24874_All	Unigene32639_All	YN	0.00160414	0.00678978	0.236257	0.196037	1692	443.843	1248.16	NA	5	3	2	NA	NA	0.00296443	1.95198:1.95198:1:1:1:1	0.453798(0.470238:0.411565:0.479592)	NA	NA	NA	NA
	Unigene5458_All	Unigene1712_All	YN	0.00680724	0.0288377	0.236053	0.00268796	1536	353.65	1182.35	NA	18	10	8	NA	NA	0.0118796	0.877969:0.877969:1:1:1:1	0.448568(0.47168:0.449219:0.424805)	NA	NA	NA	NA
	Unigene41556_All	Unigene35537_All	YN	0.00658878	0.0279732	0.235539	0.0619143	603	145.677	457.323	NA	7	4	3	NA	NA	0.011755	2:2:1:1:1:1	0.433665(0.49005:0.320896:0.49005)	NA	NA	NA	NA
	Unigene8792_All	Unigene10105_All	YN	0.00446383	0.0189583	0.235455	0.0105269	888	213.667	674.333	NA	7	4	3	NA	NA	0.00795144	2:2:1:1:1:1	0.41723(0.486486:0.393581:0.371622)	NA	NA	NA	NA
	Unigene6861_All	Unigene20690_All	YN	0.00957271	0.0406661	0.235398	0.0137711	756	193.715	562.285	NA	13	7.65383	5.34617	NA	NA	0.01754	2.90184:2.90184:1:1:1:1	0.509921(0.482143:0.430556:0.617063)	NA	NA	NA	NA
	Unigene4568_All	Unigene1868_All	YN	0.00417939	0.0177575	0.23536	0.061338	948	227.935	720.065	NA	7	4	3	NA	NA	0.00744407	2:2:1:1:1:1	0.418763(0.444969:0.389937:0.421384)	NA	NA	NA	NA
	Unigene26403_All	Unigene24080_All	YN	0.0067271	0.02862	0.235049	0.0622069	591	142.996	448.004	NA	7	4	3	NA	NA	0.0120242	1.81257:1.81257:1:1:1:1	0.444444(0.431925:0.420188:0.481221)	NA	NA	NA	NA
	Unigene13001_All	Unigene12614_All	YN	0.00148734	0.00635632	0.233994	0.164813	1662	315.983	1346.02	NA	4	2	2	NA	NA	0.00241304	2:2:1:1:1:1	0.40012(0.451264:0.397112:0.351986)	NA	NA	NA	NA
	Unigene1954_All	Unigene16684_All	YN	0.00577492	0.0246897	0.2339	0.0611402	687	165.237	521.763	NA	7	4	3	NA	NA	0.0103243	2:2:1:1:1:1	0.432314(0.49345:0.366812:0.436681)	NA	NA	NA	NA
	Unigene26114_All	Unigene68107_All	YN	0.00625389	0.0267736	0.233584	0.0106622	1230	266.542	963.458	NA	13	7	6	NA	NA	0.0107005	1.97427:1.97427:1:1:1:1	0.40015(0.495495:0.384009:0.320946)	NA	NA	NA	NA
	Unigene9071_All	Unigene35569_All	YN	0.00320374	0.0137171	0.233557	0.0600284	1233	294.307	938.693	NA	7	4	3	NA	NA	0.0057132	3.08367:3.08367:1:1:1:1	0.415653(0.510949:0.364964:0.371046)	NA	NA	NA	NA
	Unigene22949_All	Unigene6328_All	YN	0.0124703	0.0533937	0.233554	0.00344483	861	213.908	647.092	NA	19	11	8	NA	NA	0.0226374	3.31546:3.31546:1:1:1:1	0.416376(0.442509:0.383275:0.423345)	NA	NA	NA	NA
	Unigene19047_All	Unigene23557_All	YN	0.00210649	0.00902238	0.233474	0.301834	783	197.171	585.829	NA	3	1.76769	1.23231	NA	NA	0.00384801	2:2:1:1:1:1	0.432214(0.498134:0.408582:0.389925)	NA	NA	NA	NA
	Unigene21585_All	Unigene18814_All	YN	0.00441442	0.018923	0.233284	0.194497	615	160.546	454.454	NA	5	3	2	NA	NA	0.00820188	1.82781:1.82781:1:1:1:1	0.501626(0.563415:0.402439:0.539024)	NA	NA	NA	NA
	Unigene40313_All	Unigene7437_All	YN	0.0039859	0.017088	0.233258	0.194688	681	177.854	503.146	NA	5	3	2	NA	NA	0.00740771	1.90362:1.90362:1:1:1:1	0.513216(0.528634:0.460352:0.550661)	NA	NA	NA	NA
	Unigene8086_All	Unigene8681_All	YN	0.00591925	0.0254072	0.232975	0.0262082	960	281.035	678.965	NA	11	7	4	NA	NA	0.0116243	6.10703:6.10703:1:1:1:1	0.417187(0.448437:0.360938:0.442188)	NA	NA	NA	NA
	Unigene9698_All	Unigene18818_All	YN	0.00903525	0.0390125	0.231599	0.000179441	1845	397.391	1447.61	NA	28	15	13	NA	NA	0.015492	1.62944:1.62944:1:1:1:1	0.467315(0.547812:0.420583:0.433549)	NA	NA	NA	NA
	Unigene2090_All	Unigene30503_All	YN	0.00410268	0.0177186	0.231546	0.00217972	2643	687.658	1955.34	NA	20	12	8	NA	NA	0.00764528	2.51537:2.51537:1:1:1:1	0.43377(0.472707:0.385917:0.442686)	NA	NA	NA	NA
	Unigene23847_All	Unigene1267_All	YN	0.00327629	0.0141516	0.231513	0.0587592	1203	285.328	917.672	NA	7	4	3	NA	NA	0.00585571	2:2:1:1:1:1	0.424921(0.510613:0.379717:0.384434)	NA	NA	NA	NA
	Unigene35839_All	Unigene40446_All	YN	0.00576969	0.0249493	0.231257	0.0100661	1239	368.916	870.084	NA	14	9	5	NA	NA	0.0114805	6.53912:6.53912:1:1:1:1	0.426683(0.465144:0.379808:0.435096)	NA	NA	NA	NA
	Unigene33580_All	Unigene35659_All	YN	0.00423622	0.0183486	0.230874	0.0694919	987	276.706	710.294	NA	8	5	3	NA	NA	0.00819264	2.4172:2.4172:1:1:1:1	0.41784(0.528169:0.269014:0.456338)	NA	NA	NA	NA
	Unigene35752_All	Unigene62437_All	YN	0.00429981	0.0186352	0.230735	0.193501	630	163.276	466.724	NA	5	3	2	NA	NA	0.0080151	2.1472:2.1472:1:1:1:1	0.45873(0.578571:0.385714:0.411905)	NA	NA	NA	NA
	Unigene39114_All	Unigene732_All	YN	0.00181086	0.00785017	0.230678	0.161696	1362	256.107	1105.89	NA	4	2	2	NA	NA	0.00294648	1.29459:1.29459:1:1:1:1	0.383808(0.473577:0.227642:0.450203)	NA	NA	NA	NA
	Unigene38928_All	Unigene16348_All	YN	0.0121022	0.052509	0.230479	0.00182165	885	218.36	666.64	NA	19	11	8	NA	NA	0.022072	2.86277:2.86277:1:1:1:1	0.460586(0.5:0.476351:0.405405)	NA	NA	NA	NA
	Unigene36301_All	Unigene40484_All	YN	0.00241297	0.0104768	0.230316	0.193396	1119	288.617	830.383	NA	5	3	2	NA	NA	0.00449283	1.96934:1.96934:1:1:1:1	0.48168(0.55496:0.439678:0.450402)	NA	NA	NA	NA
	Unigene8514_All	Unigene32979_All	YN	0.00651508	0.0283042	0.23018	0.0126753	879	202.585	676.415	NA	10	5.61974	4.38026	NA	NA	0.0115369	0.986349:0.986349:1:1:1:1	0.434463(0.49661:0.371186:0.435593)	NA	NA	NA	NA
	Unigene19452_All	Unigene50200_All	YN	0.00288251	0.0125231	0.230176	0.0315789	1794	403.569	1390.43	NA	9	5	4	NA	NA	0.0050512	2.04868:2.04868:1:1:1:1	0.392966(0.482416:0.357034:0.33945)	NA	NA	NA	NA
	Unigene35699_All	Unigene6140_All	YN	0.00401384	0.017454	0.229966	0.0257206	1407	407.249	999.751	NA	11	7	4	NA	NA	0.00790402	5.51328:5.51328:1:1:1:1	0.429282(0.533049:0.362473:0.392324)	NA	NA	NA	NA
	Unigene37780_All	Unigene21850_All	YN	0.0037896	0.0164933	0.229766	0.0691853	1101	307.359	793.641	NA	8	5	3	NA	NA	0.00733602	7.37633:7.37633:1:1:1:1	0.443993(0.552846:0.418699:0.360434)	NA	NA	NA	NA
	Unigene28967_All	Unigene26915_All	YN	0.00673916	0.0293466	0.22964	0.00349608	1428	384.301	1043.7	NA	18	11	7	NA	NA	0.0128232	4.7272:4.7272:1:1:1:1	0.397759(0.476891:0.352941:0.363445)	NA	NA	NA	NA
	Unigene8889_All	Unigene25362_All	YN	0.00276773	0.0120546	0.2296	0.192965	975	250.873	724.127	NA	5	3	2	NA	NA	0.00515729	2:2:1:1:1:1	0.473846(0.516923:0.470769:0.433846)	NA	NA	NA	NA
	Unigene26918_All	Unigene19110_All	YN	0.0116978	0.0512302	0.228338	0.00984404	615	183.917	431.083	NA	14	9	5	NA	NA	0.0235201	7.09364:7.09364:1:1:1:1	0.437702(0.526699:0.36165:0.424757)	NA	NA	NA	NA
	Unigene4628_All	Unigene20059_All	YN	0.002036	0.00896873	0.227011	0.0299714	2529	561.303	1967.7	NA	9	5	4	NA	NA	0.00357469	2:2:1:1:1:1	0.411572(0.515284:0.35917:0.360262)	NA	NA	NA	NA
	Unigene37100_All	Unigene11149_All	YN	0.00451342	0.0199025	0.226777	0.00490473	1794	460.495	1333.5	NA	15	9	6	NA	NA	0.00846358	3.36745:3.36745:1:1:1:1	0.441291(0.525042:0.434891:0.36394)	NA	NA	NA	NA
	Unigene29307_All	Unigene16374_All	YN	0.0104714	0.0462883	0.226221	0.000899957	1134	268.469	865.531	NA	21	12	9	NA	NA	0.0189509	1.34265:1.34265:1:1:1:1	0.44723(0.514512:0.402375:0.424802)	NA	NA	NA	NA
	Unigene39540_All	Unigene25516_All	YN	0.00276522	0.0122281	0.226136	0.191514	972	247.341	724.659	NA	5	3	2	NA	NA	0.00517322	2:2:1:1:1:1	0.423354(0.408951:0.407407:0.453704)	NA	NA	NA	NA
	Unigene1014_All	Unigene1913_All	YN	0.00478807	0.0212071	0.225777	0.0106196	1197	265.968	931.032	NA	10	5.5568	4.4432	NA	NA	0.0084363	3.37886:3.37886:1:1:1:1	0.413965(0.506234:0.369077:0.366584)	NA	NA	NA	NA
	Unigene2885_All	Unigene19502_All	YN	0.00411411	0.0182239	0.225753	0.0556387	954	222.77	731.23	NA	7	4	3	NA	NA	0.00740891	2.47591:2.47591:1:1:1:1	0.433962(0.498428:0.433962:0.369497)	NA	NA	NA	NA
	Unigene2568_All	Unigene10667_All	YN	0.00668249	0.0296051	0.225721	0.00211964	1467	413.992	1053.01	NA	19	12	7	NA	NA	0.0131513	7.94765:7.94765:1:1:1:1	0.439484(0.505952:0.386905:0.425595)	NA	NA	NA	NA
	Unigene21083_All	Unigene1089_All	YN	0.00436798	0.0194214	0.224905	0.0888305	636	150.609	485.391	NA	5	2.88612	2.11388	NA	NA	0.00793272	2.01295:2.01295:1:1:1:1	0.442685(0.479638:0.502262:0.346154)	NA	NA	NA	NA
	Unigene9913_All	Unigene35582_All	YN	0.00390096	0.0173689	0.224595	0.0549019	1005	233.705	771.295	NA	7	4	3	NA	NA	0.00703281	2.29339:2.29339:1:1:1:1	0.423383(0.540299:0.441791:0.28806)	NA	NA	NA	NA
	Unigene6583_All	Unigene26830_All	YN	0.00688541	0.0307014	0.22427	0.00545779	1209	333.015	875.985	NA	16	10	6	NA	NA	0.0134454	6.27544:6.27544:1:1:1:1	0.402905(0.446101:0.332569:0.430046)	NA	NA	NA	NA
	Unigene27106_All	Unigene18373_All	YN	0.00330808	0.0147829	0.223778	0.0674685	1251	341.869	909.131	NA	8	5	3	NA	NA	0.00644388	3.63166:3.63166:1:1:1:1	0.451878(0.498826:0.456573:0.400235)	NA	NA	NA	NA
	Unigene39055_All	Unigene19899_All	YN	0.0186025	0.0832168	0.223543	1.12575e-07	1668	408.154	1259.85	NA	55	31.8528	23.1472	NA	NA	0.0344134	1.99154:1.99154:1:1:1:1	0.434053(0.463129:0.448741:0.390288)	NA	NA	NA	NA
	Unigene29686_All	Unigene24468_All	YN	0.00410646	0.0183766	0.223462	0.190478	654	165.582	488.418	NA	5	3	2	NA	NA	0.00771943	2.07134:2.07134:1:1:1:1	0.442943(0.527027:0.418919:0.382883)	NA	NA	NA	NA
	Unigene4209_All	Unigene33469_All	YN	0.00602467	0.0269903	0.223216	0.0206041	894	226.852	667.148	NA	10	6	4	NA	NA	0.0113447	5.11915:5.11915:1:1:1:1	0.416667(0.498418:0.368671:0.382911)	NA	NA	NA	NA
	Unigene18927_All	Unigene15775_All	YN	0.00696872	0.0312827	0.222766	0.00615784	1383	229.536	1153.46	NA	15	7	8	NA	NA	0.0110041	0.56783:0.56783:1:1:1:1	0.420824(0.519523:0.318872:0.424078)	NA	NA	NA	NA
	Unigene1290_All	Unigene56791_All	YN	0.00430147	0.0193293	0.222537	0.190062	624	157.526	466.474	NA	5	3	2	NA	NA	0.00809517	2.18466:2.18466:1:1:1:1	0.412403(0.446512:0.413953:0.376744)	NA	NA	NA	NA
	Unigene47780_All	Unigene6172_All	YN	0.00401849	0.0180585	0.222526	0.00358383	1335	336.83	998.17	NA	10	6	4	NA	NA	0.00756089	3.54365:3.54365:1:1:1:1	0.433908(0.503233:0.414871:0.383621)	NA	NA	NA	NA
	Unigene29598_All	Unigene32304_All	YN	0.00253407	0.0113982	0.222321	0.067253	1629	442.878	1186.12	NA	8	5	3	NA	NA	0.00494397	2.93272:2.93272:1:1:1:1	0.438306(0.497238:0.411602:0.406077)	NA	NA	NA	NA
	Unigene36503_All	Unigene69363_All	YN	0.00324132	0.0145925	0.222123	0.0199914	1653	415.742	1237.26	NA	10	6	4	NA	NA	0.00609622	2.43319:2.43319:1:1:1:1	0.440714(0.539927:0.395644:0.38657)	NA	NA	NA	NA
	Unigene25385_All	Unigene18916_All	YN	0.00747978	0.0336756	0.222113	0.0144333	915	243.193	671.807	NA	13	8	5	NA	NA	0.0144422	2:2:1:1:1:1	0.443935(0.524465:0.432722:0.374618)	NA	NA	NA	NA
	Unigene29705_All	Unigene2103_All	YN	0.00753832	0.0339639	0.221951	0.0144241	909	241.543	667.457	NA	13	8	5	NA	NA	0.0145602	6.7673:6.7673:1:1:1:1	0.449387(0.503067:0.444785:0.400307)	NA	NA	NA	NA
	Unigene41890_All	Unigene33670_All	YN	0.00411487	0.0185544	0.221774	0.0670214	1005	273.678	731.322	NA	8	5	3	NA	NA	0.00804698	3.46007:3.46007:1:1:1:1	0.450249(0.525373:0.392537:0.432836)	NA	NA	NA	NA
	Unigene2107_All	Unigene6869_All	YN	0.00566795	0.0255871	0.221516	0.00685016	1518	278.269	1239.73	NA	14	7	7	NA	NA	0.00931938	1.2819:1.2819:1:1:1:1	0.419631(0.514822:0.382411:0.36166)	NA	NA	NA	NA
	Unigene9204_All	Unigene12291_All	YN	0.00378264	0.0170854	0.221396	0.189642	708	177.879	530.121	NA	5	3	2	NA	NA	0.00712484	1.86261:1.86261:1:1:1:1	0.442797(0.474576:0.334746:0.519068)	NA	NA	NA	NA
	Unigene29791_All	Unigene39596_All	YN	0.00672471	0.0304417	0.220905	0.00237798	1383	337.08	1045.92	NA	17	10	7	NA	NA	0.0125053	3.99712:3.99712:1:1:1:1	0.417932(0.515184:0.402386:0.336226)	NA	NA	NA	NA
	Unigene3817_All	Unigene6712_All	YN	0.00481394	0.0217931	0.220893	0.0411207	1020	186.355	833.645	NA	8	4	4	NA	NA	0.00791606	0.905378:0.905378:1:1:1:1	0.449805(0.545322:0.402047:0.402047)	NA	NA	NA	NA
	Unigene32256_All	Unigene38098_All	YN	0.00535956	0.0243438	0.220161	0.0519612	729	166.994	562.006	NA	7	4	3	NA	NA	0.00970833	1.88618:1.88618:1:1:1:1	0.439922(0.556202:0.352713:0.410853)	NA	NA	NA	NA
	Unigene21168_All	Unigene38812_All	YN	0.00756403	0.0344705	0.219434	0.0056443	1035	237.611	797.389	NA	14	8	6	NA	NA	0.0137411	1.76127:1.76127:1:1:1:1	0.439524(0.468571:0.447143:0.402857)	NA	NA	NA	NA
	Unigene53396_All	Unigene26903_All	YN	0.00541039	0.0246597	0.219402	0.0193484	990	247.915	742.085	NA	10	6	4	NA	NA	0.0102308	3.35751:3.35751:1:1:1:1	0.423737(0.484848:0.404545:0.381818)	NA	NA	NA	NA
	Unigene19238_All	Unigene38800_All	YN	0.00442837	0.0201876	0.219362	0.0074833	1536	402.753	1133.25	NA	13	8	5	NA	NA	0.00856057	3.85553:3.85553:1:1:1:1	0.419075(0.518304:0.357418:0.381503)	NA	NA	NA	NA
	Unigene18728_All	Unigene9463_All	YN	0.00365724	0.016687	0.219167	0.0239547	1521	424.52	1096.48	NA	11	7	4	NA	NA	0.00729392	3.35424:3.35424:1:1:1:1	0.458251(0.50789:0.374753:0.49211)	NA	NA	NA	NA
	Unigene8898_All	Unigene37557_All	YN	0.00635573	0.0290111	0.219079	0.0516078	615	140.724	474.276	NA	7	4	3	NA	NA	0.0115397	1.11847:1.11847:1:1:1:1	0.430081(0.536585:0.385366:0.368293)	NA	NA	NA	NA
	Unigene19257_All	Unigene6924_All	YN	0.00679889	0.0310364	0.219062	0.00743101	1002	263.132	738.868	NA	13	8	5	NA	NA	0.0131638	3.62416:3.62416:1:1:1:1	0.445609(0.522455:0.378743:0.435629)	NA	NA	NA	NA
	Unigene19697_All	Unigene27051_All	YN	0.00371932	0.0169977	0.218813	0.0412555	1167	358.382	808.618	NA	9	6	3	NA	NA	0.00779706	2.94896:2.94896:1:1:1:1	0.483719(0.613111:0.446015:0.392031)	NA	NA	NA	NA
	Unigene29478_All	Unigene24154_All	YN	0.00585297	0.0267651	0.218679	0.0075538	1164	306.118	857.882	NA	13	8	5	NA	NA	0.0113526	3.42554:3.42554:1:1:1:1	0.445717(0.47201:0.440204:0.424936)	NA	NA	NA	NA
	Unigene29246_All	Unigene3753_All	YN	0.00437858	0.0200454	0.218433	0.00391775	1830	455.539	1374.46	NA	15	9	6	NA	NA	0.00827851	2.005:2.005:1:1:1:1	0.46089(0.595092:0.437883:0.349693)	NA	NA	NA	NA
	Unigene19255_All	Unigene1339_All	YN	0.00526199	0.0241258	0.218106	0.050812	741	168.609	572.391	NA	7	4	3	NA	NA	0.00955431	2:2:1:1:1:1	0.428475(0.475709:0.451417:0.3583)	NA	NA	NA	NA
	Unigene4321_All	Unigene4992_All	YN	0.00275438	0.0126309	0.218066	0.036106	1491	399.567	1091.43	NA	8	5	3	NA	NA	0.00540116	2.34552:2.34552:1:1:1:1	0.42844(0.442202:0.391743:0.451376)	NA	NA	NA	NA
	Unigene38603_All	Unigene24553_All	YN	0.0082411	0.0378187	0.217911	0.0235269	678	189.868	488.132	NA	11	7	4	NA	NA	0.016524	3.33528:3.33528:1:1:1:1	0.508112(0.471239:0.482301:0.570796)	NA	NA	NA	NA
	Unigene27684_All	Unigene35234_All	YN	0.00419646	0.0192651	0.217827	0.100467	636	158.002	477.998	NA	5	3	2	NA	NA	0.00793998	1.86308:1.86308:1:1:1:1	0.437107(0.471698:0.358491:0.481132)	NA	NA	NA	NA
	Unigene38714_All	Unigene1079_All	YN	0.0216575	0.0994294	0.217818	1.17884e-11	2115	553.736	1561.26	NA	84	50.6975	33.3025	NA	NA	0.0420193	4.1389:4.1389:1:1:1:1	0.4462(0.528846:0.42239:0.387363)	NA	NA	NA	NA
	Unigene40100_All	Unigene23689_All	YN	0.00766158	0.0351821	0.217769	0.00785406	876	199.096	676.904	NA	12	6.84065	5.15935	NA	NA	0.0139164	0.706922:0.706922:1:1:1:1	0.479522(0.518771:0.438567:0.481229)	NA	NA	NA	NA
	Unigene8396_All	Unigene25883_All	YN	0.00675961	0.0310495	0.217705	0.0102344	975	231.659	743.341	NA	12	7	5	NA	NA	0.0125309	2:2:1:1:1:1	0.429744(0.469231:0.358462:0.461538)	NA	NA	NA	NA
	Unigene8872_All	Unigene26066_All	YN	0.00871923	0.0401181	0.217339	0.000660318	1347	308.384	1038.62	NA	21	12	9	NA	NA	0.0159077	2.40508:2.40508:1:1:1:1	0.410542(0.453229:0.351893:0.426503)	NA	NA	NA	NA
	Unigene19303_All	Unigene16321_All	YN	0.00331247	0.0152516	0.217188	0.099314	804	198.707	605.293	NA	5	3	2	NA	NA	0.00626321	2:2:1:1:1:1	0.461443(0.535448:0.380597:0.468284)	NA	NA	NA	NA
	Unigene19656_All	Unigene10143_All	YN	0.00897654	0.0413662	0.217002	0.00065556	1308	299.33	1008.67	NA	21	12	9	NA	NA	0.0163888	1.19817:1.19817:1:1:1:1	0.477189(0.52649:0.441501:0.463576)	NA	NA	NA	NA
	Unigene22265_All	Unigene3845_All	YN	0.00750571	0.0345897	0.216993	0.0002743	1680	474.54	1205.46	NA	25	16	9	NA	NA	0.015156	4.80911:4.80911:1:1:1:1	0.450683(0.529412:0.428699:0.393939)	NA	NA	NA	NA
	Unigene52150_All	Unigene27946_All	YN	0.0151123	0.0697356	0.216709	6.93118e-05	813	211.419	601.581	NA	23	14	9	NA	NA	0.029317	1.83474:1.83474:1:1:1:1	0.407345(0.423729:0.388136:0.410169)	NA	NA	NA	NA
	Unigene18961_All	Unigene30579_All	YN	0.00574443	0.0265131	0.216664	0.0406421	756	231.496	524.504	NA	9	6	3	NA	NA	0.012104	12.3206:12.3206:1:1:1:1	0.453704(0.587302:0.40873:0.365079)	NA	NA	NA	NA
	Unigene31187_All	Unigene33521_All	YN	0.00601403	0.0277653	0.216603	0.0500669	648	146.909	501.091	NA	7	4	3	NA	NA	0.0109453	1.015:1.015:1:1:1:1	0.472222(0.615741:0.407407:0.393519)	NA	NA	NA	NA
	Unigene26220_All	Unigene13367_All	YN	0.00315684	0.0145787	0.216537	0.0990094	843	208.071	634.929	NA	5	3	2	NA	NA	0.00597602	1.89114:1.89114:1:1:1:1	0.455241(0.531802:0.438163:0.39576)	NA	NA	NA	NA
	Unigene36005_All	Unigene16954_All	YN	0.00394059	0.0182095	0.216403	0.00287108	2283	501.888	1781.11	NA	16	9	7	NA	NA	0.00707744	2.08406:2.08406:1:1:1:1	0.427384(0.526903:0.414042:0.341207)	NA	NA	NA	NA
	Unigene5283_All	Unigene16275_All	YN	0.006622	0.0306375	0.216141	0.00977646	993	234.053	758.947	NA	12	7	5	NA	NA	0.0122825	2.30586:2.30586:1:1:1:1	0.42723(0.550704:0.366197:0.364789)	NA	NA	NA	NA
	Unigene19499_All	Unigene28883_All	YN	0.00197543	0.00914809	0.215939	0.0980955	1344	330.23	1013.77	NA	5	3	2	NA	NA	0.0037378	2:2:1:1:1:1	0.444568(0.508929:0.427455:0.397321)	NA	NA	NA	NA
	Unigene36120_All	Unigene17636_All	YN	0.0041958	0.0194315	0.215928	0.0070105	1614	418.934	1195.07	NA	13	8	5	NA	NA	0.00815041	2.74066:2.74066:1:1:1:1	0.413569(0.540892:0.312268:0.387546)	NA	NA	NA	NA
	Unigene24743_All	Unigene27571_All	YN	0.0125685	0.0582386	0.215811	0.00209463	741	179.051	561.949	NA	17	10	7	NA	NA	0.023604	3.64815:3.64815:1:1:1:1	0.400135(0.463563:0.366397:0.370445)	NA	NA	NA	NA
	Unigene38167_All	Unigene22660_All	YN	0.0048868	0.0226442	0.215809	0.00690704	1386	359.222	1026.78	NA	13	8	5	NA	NA	0.00948913	2.93916:2.93916:1:1:1:1	0.448052(0.568182:0.392857:0.383117)	NA	NA	NA	NA
	Unigene70180_All	Unigene5241_All	YN	0.0104378	0.048388	0.21571	0.0002686	1212	343.396	868.604	NA	25	16	9	NA	NA	0.0211902	8.33866:8.33866:1:1:1:1	0.466255(0.498765:0.441975:0.458025)	NA	NA	NA	NA
	Unigene30694_All	Unigene37723_All	YN	0.00325768	0.0151151	0.215525	0.0978333	816	200.483	615.517	NA	5	3	2	NA	NA	0.00617094	2:2:1:1:1:1	0.443431(0.594891:0.386861:0.34854)	NA	NA	NA	NA
	Unigene29634_All	Unigene402_All	YN	0.00395527	0.0183577	0.215455	0.0254579	1290	275.84	1014.16	NA	9	5	4	NA	NA	0.00703493	1.54638:1.54638:1:1:1:1	0.444317(0.455378:0.389016:0.488558)	NA	NA	NA	NA
	Unigene35967_All	Unigene70830_All	YN	0.00399537	0.0185476	0.215412	0.0983133	666	164.035	501.965	NA	5	3	2	NA	NA	0.00757958	1.91209:1.91209:1:1:1:1	0.475225(0.547297:0.466216:0.412162)	NA	NA	NA	NA
	Unigene19363_All	Unigene8425_All	YN	0.00507625	0.0235654	0.215411	0.00317741	1662	475.508	1186.49	NA	17	11	6	NA	NA	0.0103661	7.32848:7.32848:1:1:1:1	0.430806(0.494585:0.401625:0.396209)	NA	NA	NA	NA
	Unigene25295_All	Unigene1075_All	YN	0.00642555	0.0298401	0.215333	0.0181568	831	205.694	625.306	NA	10	6	4	NA	NA	0.0122213	4.23044:4.23044:1:1:1:1	0.425993(0.534296:0.406137:0.337545)	NA	NA	NA	NA
	Unigene6841_All	Unigene20604_All	YN	0.0048195	0.0223982	0.215173	0.035281	852	227.526	624.474	NA	8	5	3	NA	NA	0.00951389	2.4097:2.4097:1:1:1:1	0.434109(0.445183:0.471761:0.385382)	NA	NA	NA	NA
	Unigene66_All	Unigene25913_All	YN	0.00560451	0.0260613	0.215051	0.0255909	912	195.594	716.406	NA	9	5	4	NA	NA	0.00999181	1.00125:1.00125:1:1:1:1	0.438998(0.539216:0.392157:0.385621)	NA	NA	NA	NA
	Unigene25940_All	Unigene16423_All	YN	0.00194706	0.00905923	0.214925	0.0971847	1362	333.425	1028.58	NA	5	3	2	NA	NA	0.00368816	2.11194:2.11194:1:1:1:1	0.441263(0.476872:0.367841:0.479075)	NA	NA	NA	NA
	Unigene4303_All	Unigene20903_All	YN	0.00566086	0.0264012	0.214416	0.0493519	687	155.041	531.959	NA	7	4	3	NA	NA	0.0103415	1.32503:1.32503:1:1:1:1	0.411936(0.467249:0.445415:0.323144)	NA	NA	NA	NA
	Unigene18255_All	Unigene28901_All	YN	0.00619209	0.0289196	0.214114	0.0344128	663	176.248	486.752	NA	8	5	3	NA	NA	0.0122338	3.8059:3.8059:1:1:1:1	0.441441(0.52027:0.396396:0.407658)	NA	NA	NA	NA
	Unigene9308_All	Unigene39449_All	YN	0.00511761	0.0239149	0.213993	0.0486535	759	170.485	588.515	NA	7	4	3	NA	NA	0.00933981	2:2:1:1:1:1	0.449934(0.488142:0.363636:0.498024)	NA	NA	NA	NA
	Unigene23624_All	Unigene9000_All	YN	0.00392528	0.018415	0.213157	0.00254405	2085	552.248	1532.75	NA	16	10	6	NA	NA	0.00776313	6.77576:6.77576:1:1:1:1	0.454197(0.548201:0.416547:0.397842)	NA	NA	NA	NA
	Unigene29006_All	Unigene1308_All	YN	0.00435734	0.0204655	0.212911	0.0959405	609	148.616	460.384	NA	5	3	2	NA	NA	0.00828827	2:2:1:1:1:1	0.435015(0.516055:0.415138:0.373853)	NA	NA	NA	NA
	Unigene28445_All	Unigene5435_All	YN	0.00569584	0.0267532	0.212903	0.00528186	1263	381.554	881.446	NA	15	10	5	NA	NA	0.0120573	6.65362:6.65362:1:1:1:1	0.456057(0.548694:0.414489:0.404988)	NA	NA	NA	NA
	Unigene13485_All	Unigene33943_All	YN	0.00300247	0.0141246	0.212571	0.0169216	1764	428.965	1335.03	NA	10	6	4	NA	NA	0.00570711	3.07733:3.07733:1:1:1:1	0.438701(0.537288:0.398305:0.380508)	NA	NA	NA	NA
	Unigene5968_All	Unigene21570_All	YN	0.00742859	0.0350007	0.212242	0.0127038	801	227.756	573.244	NA	12	7.76596	4.23404	NA	NA	0.0152684	5.91451:5.91451:1:1:1:1	0.425718(0.479401:0.38015:0.417603)	NA	NA	NA	NA
	Unigene38847_All	Unigene31958_All	YN	0.00355546	0.0167585	0.212158	0.0123189	1551	423.199	1127.8	NA	11	7	4	NA	NA	0.00715798	3.75905:3.75905:1:1:1:1	0.448077(0.543269:0.397115:0.403846)	NA	NA	NA	NA
	Unigene7715_All	Unigene34030_All	YN	0.00215418	0.0101629	0.211965	0.0945343	1227	297.195	929.805	NA	5	3	2	NA	NA	0.004094	2.00683:2.00683:1:1:1:1	0.394245(0.457399:0.378924:0.346413)	NA	NA	NA	NA
	Unigene30201_All	Unigene463_All	YN	0.0206179	0.0973514	0.211788	9.03593e-07	1122	275.633	846.367	NA	42	24.7892	17.2108	NA	NA	0.0394684	2.33961:2.33961:1:1:1:1	0.429639(0.513193:0.368074:0.407652)	NA	NA	NA	NA
	Unigene30090_All	Unigene38367_All	YN	0.00595228	0.0281854	0.211183	0.0468398	651	144.719	506.281	NA	7	4	3	NA	NA	0.0108948	1.00464:1.00464:1:1:1:1	0.482335(0.548387:0.437788:0.460829)	NA	NA	NA	NA
	Unigene15223_All	Unigene33878_All	YN	0.00372896	0.0176991	0.210686	0.0119225	1476	400.559	1075.44	NA	11	7	4	NA	NA	0.0075202	3.61453:3.61453:1:1:1:1	0.449569(0.52952:0.395756:0.423432)	NA	NA	NA	NA
	Unigene29618_All	Unigene16092_All	YN	0.0129173	0.061414	0.210332	0.00028055	900	274.265	625.735	NA	24	16	8	NA	NA	0.0276962	10.506:10.506:1:1:1:1	0.510556(0.581667:0.541667:0.408333)	NA	NA	NA	NA
	Unigene40421_All	Unigene16170_All	YN	0.00567143	0.0269724	0.210268	0.0327099	720	189.02	530.98	NA	8	5	3	NA	NA	0.0112635	1.98186:1.98186:1:1:1:1	0.466667(0.510417:0.389583:0.5)	NA	NA	NA	NA
	Unigene6333_All	Unigene16453_All	YN	0.00249849	0.0118987	0.20998	0.0128431	1056	254.133	801.867	NA	5	3	2	NA	NA	0.00476072	2:2:1:1:1:1	0.442708(0.507102:0.401989:0.419034)	NA	NA	NA	NA
	Unigene34299_All	Unigene71477_All	YN	0.00735049	0.0350061	0.209978	0.00048816	1476	382.089	1093.91	NA	21	13	8	NA	NA	0.0145096	2.89806:2.89806:1:1:1:1	0.434959(0.488821:0.365854:0.450203)	NA	NA	NA	NA
	Unigene40016_All	Unigene21727_All	YN	0.00696027	0.0331788	0.209781	0.0133887	777	181.181	595.819	NA	10	5.87279	4.12721	NA	NA	0.0130739	1.76661:1.76661:1:1:1:1	0.442085(0.523166:0.397683:0.405405)	NA	NA	NA	NA
	Unigene6283_All	Unigene509_All	YN	0.00661401	0.0315556	0.209599	0.00299602	1269	357.316	911.684	NA	17	11	6	NA	NA	0.0136369	6.74529:6.74529:1:1:1:1	0.396296(0.487778:0.345556:0.355556)	NA	NA	NA	NA
	Unigene38145_All	Unigene23594_All	YN	0.00538747	0.0257481	0.209238	0.00845019	1209	277.551	931.449	NA	12	7	5	NA	NA	0.0100617	1.50228:1.50228:1:1:1:1	0.447865(0.549261:0.419951:0.374384)	NA	NA	NA	NA
	Unigene19318_All	Unigene16260_All	YN	0.0036068	0.0172542	0.209039	0.0927031	732	176.158	555.842	NA	5	3	2	NA	NA	0.00689109	1.95042:1.95042:1:1:1:1	0.452186(0.497951:0.407787:0.45082)	NA	NA	NA	NA
	Unigene27154_All	Unigene18375_All	YN	0.0049802	0.0238967	0.208405	0.0387205	861	256.276	604.724	NA	9	6	3	NA	NA	0.0106107	4.50221:4.50221:1:1:1:1	0.39657(0.509646:0.287781:0.392283)	NA	NA	NA	NA
	Unigene19508_All	Unigene38846_All	YN	0.00431598	0.0207479	0.20802	0.0159194	1224	294.482	929.518	NA	10	6	4	NA	NA	0.00826933	2.65226:2.65226:1:1:1:1	0.435615(0.551345:0.430318:0.325183)	NA	NA	NA	NA
	Unigene21582_All	Unigene8811_All	YN	0.00127728	0.00614135	0.20798	0.0909996	2058	490.772	1567.23	NA	5	3	2	NA	NA	0.00243722	1.84465:1.84465:1:1:1:1	0.427714(0.512248:0.325648:0.445245)	NA	NA	NA	NA
	Unigene20698_All	Unigene59015_All	YN	0.00666572	0.0321076	0.207606	0.0119663	945	191.507	753.493	NA	11	6	5	NA	NA	0.0118216	1.16461:1.16461:1:1:1:1	0.424714(0.439252:0.417445:0.417445)	NA	NA	NA	NA
	Unigene16254_All	Unigene22523_All	YN	0.00316958	0.0152801	0.207432	0.0911656	831	198.617	632.383	NA	5	3	2	NA	NA	0.0060641	1.91531:1.91531:1:1:1:1	0.429733(0.480836:0.416376:0.391986)	NA	NA	NA	NA
	Unigene38841_All	Unigene25034_All	YN	0.0023887	0.0115383	0.207023	0.0906383	1101	262.389	838.611	NA	5	3	2	NA	NA	0.00456923	2:2:1:1:1:1	0.442779(0.558583:0.440054:0.3297)	NA	NA	NA	NA
	Unigene18985_All	Unigene15805_All	YN	0.00515872	0.0249644	0.206644	0.00948454	1239	239.368	999.632	NA	11	5.86135	5.13865	NA	NA	0.00898506	0.899622:0.899622:1:1:1:1	0.43814(0.481087:0.458629:0.374704)	NA	NA	NA	NA
	Unigene72074_All	Unigene26851_All	YN	0.00778523	0.0377104	0.206448	0.00567064	864	218.134	645.866	NA	13	8	5	NA	NA	0.0153404	2.50207:2.50207:1:1:1:1	0.40625(0.5375:0.328125:0.353125)	NA	NA	NA	NA
	Unigene42862_All	Unigene34980_All	YN	0.00413358	0.0200378	0.206289	0.0382572	1032	303.978	728.022	NA	9	6	3	NA	NA	0.0088182	2.94126:2.94126:1:1:1:1	0.478682(0.513081:0.440407:0.482558)	NA	NA	NA	NA
	Unigene16222_All	Unigene8659_All	YN	0.006583	0.0319361	0.20613	0.00566378	1020	257.108	762.892	NA	13	8	5	NA	NA	0.0129737	3.38489:3.38489:1:1:1:1	0.434211(0.555556:0.418129:0.328947)	NA	NA	NA	NA
	Unigene41636_All	Unigene36019_All	YN	0.00467953	0.022751	0.205685	0.00595635	1599	312.796	1286.2	NA	13	7	6	NA	NA	0.00821466	1.43894:1.43894:1:1:1:1	0.399939(0.47354:0.37865:0.347628)	NA	NA	NA	NA
	Unigene19358_All	Unigene8113_All	YN	0.00857034	0.0417062	0.205493	0.013532	669	199.065	469.935	NA	12	8	4	NA	NA	0.0184301	6.01489:6.01489:1:1:1:1	0.470852(0.455157:0.493274:0.464126)	NA	NA	NA	NA
	Unigene35131_All	Unigene5832_All	YN	0.00379373	0.0184648	0.205457	0.0894182	693	164.48	528.52	NA	5	3	2	NA	NA	0.00727582	2:2:1:1:1:1	0.432507(0.559917:0.400826:0.336777)	NA	NA	NA	NA
	Unigene1820_All	Unigene6910_All	YN	0.00167065	0.00814169	0.205197	0.0886413	1569	370.477	1198.52	NA	5	3	2	NA	NA	0.00319862	1.91456:1.91456:1:1:1:1	0.427024(0.497132:0.40153:0.382409)	NA	NA	NA	NA
	Unigene29040_All	Unigene8924_All	YN	0.00953699	0.0465138	0.205036	2.14715e-06	2181	491.595	1689.4	NA	38	22	16	NA	NA	0.0178715	4.47604:4.47604:1:1:1:1	0.420823(0.533666:0.455112:0.273691)	NA	NA	NA	NA
	Unigene18584_All	Unigene6066_All	YN	0.00353102	0.0172498	0.204699	0.0106506	1548	411.986	1136.01	NA	11	7	4	NA	NA	0.00718215	6.18564:6.18564:1:1:1:1	0.418282(0.512597:0.391473:0.350775)	NA	NA	NA	NA
	Unigene28239_All	Unigene4058_All	YN	0.00222104	0.0108511	0.204683	0.0297528	1818	465.028	1352.97	NA	8	5	3	NA	NA	0.00442854	2:2:1:1:1:1	0.431793(0.459571:0.39769:0.438119)	NA	NA	NA	NA
	Unigene38462_All	Unigene4114_All	YN	0.00312421	0.0152674	0.204633	0.0885475	840	198.504	641.496	NA	5	3	2	NA	NA	0.00599382	2:2:1:1:1:1	0.438048(0.5:0.465461:0.348684)	NA	NA	NA	NA
	Unigene31050_All	Unigene15233_All	YN	0.00667022	0.0326173	0.204499	0.00200209	1218	314.452	903.548	NA	16	10	6	NA	NA	0.013369	2.60963:2.60963:1:1:1:1	0.462233(0.490148:0.455665:0.440887)	NA	NA	NA	NA
	Unigene42591_All	Unigene13606_All	YN	0.00300616	0.0147029	0.204461	0.109434	942	275.319	666.681	NA	6	4	2	NA	NA	0.00642476	3.46472:3.46472:1:1:1:1	0.508493(0.563694:0.466561:0.495223)	NA	NA	NA	NA
	Unigene36870_All	Unigene40008_All	YN	0.00392888	0.0192441	0.204161	0.0295033	1029	263.168	765.832	NA	8	5	3	NA	NA	0.00784576	2:2:1:1:1:1	0.453839(0.48688:0.472303:0.402332)	NA	NA	NA	NA
	Unigene9568_All	Unigene23916_All	YN	0.00634537	0.03109	0.204097	0.000762628	1629	362.69	1266.31	NA	19	11	8	NA	NA	0.0118547	2.53217:2.53217:1:1:1:1	0.4469(0.489871:0.457643:0.393186)	NA	NA	NA	NA
	Unigene16583_All	Unigene19883_All	YN	0.00211853	0.0104076	0.203556	0.0875582	1236	290.568	945.432	NA	5	3	2	NA	NA	0.00406719	2.03999:2.03999:1:1:1:1	0.413112(0.526066:0.341232:0.372038)	NA	NA	NA	NA
	Unigene2757_All	Unigene34909_All	YN	0.0031555	0.0155024	0.203549	0.0878634	831	195.793	635.207	NA	5	3	2	NA	NA	0.00606457	1.88761:1.88761:1:1:1:1	0.429001(0.454874:0.409747:0.422383)	NA	NA	NA	NA
	Unigene36566_All	Unigene35242_All	YN	0.00145292	0.00714943	0.203222	0.0870166	1800	421.901	1378.1	NA	5	3	2	NA	NA	0.00278813	2.36537:2.36537:1:1:1:1	0.418889(0.505833:0.391667:0.359167)	NA	NA	NA	NA
	Unigene27070_All	Unigene6043_All	YN	0.00666174	0.0328082	0.203051	0.00731342	972	218.062	753.938	NA	12	7	5	NA	NA	0.0125275	1.92116:1.92116:1:1:1:1	0.405314(0.523188:0.363768:0.328986)	NA	NA	NA	NA
	Unigene690_All	Unigene25327_All	YN	0.00471671	0.0232338	0.20301	0.00740727	1371	307.506	1063.49	NA	12	7	5	NA	NA	0.00886998	1.6708:1.6708:1:1:1:1	0.393508(0.428884:0.363239:0.388403)	NA	NA	NA	NA
	Unigene8982_All	Unigene40269_All	YN	0.00427338	0.0210639	0.202877	0.0289613	945	240.722	704.278	NA	8	5	3	NA	NA	0.00855046	2:2:1:1:1:1	0.426984(0.561905:0.387302:0.331746)	NA	NA	NA	NA
	Unigene20504_All	Unigene37637_All	YN	0.00471654	0.0232507	0.202856	0.000144141	2742	615.041	2126.96	NA	24	14	10	NA	NA	0.00887383	1.56477:1.56477:1:1:1:1	0.441648(0.498906:0.456783:0.369256)	NA	NA	NA	NA
	Unigene27167_All	Unigene23605_All	YN	0.00286078	0.0141144	0.202685	0.0868396	915	214.555	700.445	NA	5	3	2	NA	NA	0.0054996	2:2:1:1:1:1	0.406011(0.414754:0.404918:0.398361)	NA	NA	NA	NA
	Unigene23182_All	Unigene32421_All	YN	0.00313624	0.0154735	0.202684	0.00366482	2187	589.123	1597.88	NA	14	9	5	NA	NA	0.0064596	3.1668:3.1668:1:1:1:1	0.438793(0.465654:0.453104:0.397622)	NA	NA	NA	NA
	Unigene72316_All	Unigene24873_All	YN	0.00155792	0.00769525	0.202452	0.0863039	1677	391.854	1285.15	NA	5	3	2	NA	NA	0.00299199	2.04097:2.04097:1:1:1:1	0.411612(0.454073:0.410745:0.370017)	NA	NA	NA	NA
	Unigene2528_All	Unigene22408_All	YN	0.00741281	0.0367709	0.201594	0.00999532	738	195.189	542.811	NA	11	7	4	NA	NA	0.0151775	5.10168:5.10168:1:1:1:1	0.403704(0.511111:0.357407:0.342593)	NA	NA	NA	NA
	Unigene28538_All	Unigene18866_All	YN	0.00430034	0.0213452	0.201467	0.0862252	609	142.586	466.414	NA	5	3	2	NA	NA	0.00829109	2:2:1:1:1:1	0.463054(0.522167:0.536946:0.330049)	NA	NA	NA	NA
	Unigene652_All	Unigene37976_All	YN	0.00382561	0.0189967	0.201382	0.00436575	1053	266.55	786.45	NA	8	5	3	NA	NA	0.00766594	2:2:1:1:1:1	0.41982(0.458108:0.417568:0.383784)	NA	NA	NA	NA
	Unigene41263_All	Unigene16179_All	YN	0.00281951	0.0140036	0.201342	0.085719	927	216.272	710.728	NA	5	3	2	NA	NA	0.00542879	1.71144:1.71144:1:1:1:1	0.460626(0.511327:0.446602:0.423948)	NA	NA	NA	NA
	Unigene5672_All	Unigene18809_All	YN	0.00679223	0.0337603	0.20119	0.00226958	774	182.371	591.629	NA	10	6	4	NA	NA	0.0131465	1.36395:1.36395:1:1:1:1	0.450258(0.498062:0.406977:0.445736)	NA	NA	NA	NA
	Unigene7984_All	Unigene5146_All	YN	0.00138653	0.00689403	0.20112	0.0851463	1881	437.162	1443.84	NA	5	3	2	NA	NA	0.00266652	1.93012:1.93012:1:1:1:1	0.421318(0.511164:0.381978:0.370813)	NA	NA	NA	NA
	Unigene2359_All	Unigene7570_All	YN	0.00872046	0.0434179	0.20085	0.00252498	906	213.809	692.191	NA	15	9	6	NA	NA	0.0169088	1.95226:1.95226:1:1:1:1	0.477124(0.486928:0.50817:0.436275)	NA	NA	NA	NA
	Unigene17835_All	Unigene9016_All	YN	0.00371162	0.0184816	0.200827	0.0096891	1464	383.494	1080.51	NA	11	7	4	NA	NA	0.00758062	3.03803:3.03803:1:1:1:1	0.419777(0.459725:0.349705:0.449902)	NA	NA	NA	NA
	Unigene37800_All	Unigene33938_All	YN	0.00541759	0.0269898	0.200727	0.0048895	1230	302.902	927.098	NA	13	8	5	NA	NA	0.01073	2:2:1:1:1:1	0.422897(0.464953:0.363318:0.440421)	NA	NA	NA	NA
	Unigene39059_All	Unigene16524_All	YN	0.00282182	0.0140625	0.200663	0.0374816	1497	431.832	1065.17	NA	9	6	3	NA	NA	0.00606438	7.24745:7.24745:1:1:1:1	0.414708(0.459313:0.403255:0.381555)	NA	NA	NA	NA
	Unigene31022_All	Unigene14956_All	YN	0.00490811	0.0244791	0.200502	0.0283581	822	208.501	613.499	NA	8	5	3	NA	NA	0.00987233	4.45862:4.45862:1:1:1:1	0.430657(0.558394:0.368613:0.364964)	NA	NA	NA	NA
	Unigene9281_All	Unigene26083_All	YN	0.00500068	0.0249689	0.200276	0.0407133	765	163.08	601.92	NA	7	4	3	NA	NA	0.00925743	1.40118:1.40118:1:1:1:1	0.407738(0.483929:0.425:0.314286)	NA	NA	NA	NA
	Unigene74025_All	Unigene62738_All	YN	0.0126878	0.0633612	0.200246	0.000140373	897	227.679	669.321	NA	22	13.5818	8.41817	NA	NA	0.0255499	2.67813:2.67813:1:1:1:1	0.398882(0.402439:0.39939:0.394817)	NA	NA	NA	NA
	Unigene36396_All	Unigene22688_All	YN	0.00423423	0.0211891	0.199831	0.0280734	951	240.475	710.525	NA	8	5	3	NA	NA	0.00852152	1.36753:1.36753:1:1:1:1	0.419033(0.509464:0.416404:0.33123)	NA	NA	NA	NA
	Unigene18630_All	Unigene39737_All	YN	0.005608	0.0280656	0.199818	0.0371853	756	219.047	536.953	NA	9	6	3	NA	NA	0.012115	2.4939:2.4939:1:1:1:1	0.527778(0.561508:0.47619:0.545635)	NA	NA	NA	NA
	Unigene20165_All	Unigene800_All	YN	0.00490979	0.0245897	0.199669	0.000430722	1437	414.467	1022.53	NA	15	10	5	NA	NA	0.010586	7.10853:7.10853:1:1:1:1	0.453612(0.503976:0.429423:0.427435)	NA	NA	NA	NA
	Unigene73418_All	Unigene66116_All	YN	0.00289274	0.0144993	0.199508	0.107778	972	279.096	692.904	NA	6	4	2	NA	NA	0.00622542	4.51102:4.51102:1:1:1:1	0.432645(0.436578:0.415929:0.445428)	NA	NA	NA	NA
	Unigene15824_All	Unigene2698_All	YN	0.00890479	0.0446398	0.199481	0.00512031	654	180.845	473.155	NA	12	7.8122	4.1878	NA	NA	0.0187863	4.46034:4.46034:1:1:1:1	0.538991(0.454128:0.541284:0.62156)	NA	NA	NA	NA
	Unigene9935_All	Unigene16287_All	YN	0.00705497	0.0353786	0.199413	0.00123429	1287	289.973	997.027	NA	17	10	7	NA	NA	0.0134366	1.61425:1.61425:1:1:1:1	0.458042(0.561772:0.39627:0.416084)	NA	NA	NA	NA
	Unigene9485_All	Unigene35491_All	YN	0.00600221	0.030106	0.199369	0.0135546	873	203.876	669.124	NA	10	6	4	NA	NA	0.0116313	0.922165:0.922165:1:1:1:1	0.452463(0.510309:0.407216:0.439863)	NA	NA	NA	NA
	Unigene25497_All	Unigene37705_All	YN	0.00404576	0.020311	0.19919	0.107567	696	200.152	495.848	NA	6	4	2	NA	NA	0.00872323	4.45054:4.45054:1:1:1:1	0.509186(0.525591:0.419291:0.582677)	NA	NA	NA	NA
	Unigene19298_All	Unigene34712_All	YN	0.00542142	0.0272213	0.199161	0.0400373	705	149.626	555.374	NA	7	4	3	NA	NA	0.0100481	0.966738:0.966738:1:1:1:1	0.433333(0.570213:0.355319:0.374468)	NA	NA	NA	NA
	Unigene10779_All	Unigene33767_All	YN	0.00302788	0.0152223	0.198911	0.0837188	861	199.086	661.914	NA	5	3	2	NA	NA	0.00584755	2:2:1:1:1:1	0.436121(0.541812:0.376307:0.390244)	NA	NA	NA	NA
	Unigene8078_All	Unigene16468_All	YN	0.00412893	0.020786	0.198639	0.00242522	1704	488.865	1215.13	NA	15	10	5	NA	NA	0.00890773	6.96399:6.96399:1:1:1:1	0.438674(0.493838:0.390845:0.431338)	NA	NA	NA	NA
	Unigene19245_All	Unigene36575_All	YN	0.00302654	0.0152448	0.198529	0.0834013	861	198.795	662.205	NA	5	3	2	NA	NA	0.0058476	2:2:1:1:1:1	0.460069(0.559028:0.465278:0.355903)	NA	NA	NA	NA
	Unigene21343_All	Unigene2794_All	YN	0.00733992	0.0369813	0.198477	0.000614261	1293	334.313	958.687	NA	19	12	7	NA	NA	0.0150039	3.15745:3.15745:1:1:1:1	0.435367(0.507625:0.41939:0.379085)	NA	NA	NA	NA
	Unigene26683_All	Unigene3290_All	YN	0.00432041	0.021784	0.19833	0.0271532	930	233.356	696.644	NA	8	5	3	NA	NA	0.00870238	2:2:1:1:1:1	0.452151(0.485484:0.493548:0.377419)	NA	NA	NA	NA
	Unigene1718_All	Unigene32153_All	YN	0.00639959	0.032285	0.198222	0.00280266	1134	348.533	785.467	NA	16	11	5	NA	NA	0.0143554	6.91015:6.91015:1:1:1:1	0.501764(0.517196:0.421958:0.566138)	NA	NA	NA	NA
	Unigene20256_All	Unigene4584_All	YN	0.00546018	0.0275602	0.198119	0.00335956	1254	334.879	919.121	NA	14	9	5	NA	NA	0.011362	4.94727:4.94727:1:1:1:1	0.409888(0.449761:0.381579:0.398325)	NA	NA	NA	NA
	Unigene36317_All	Unigene33662_All	YN	0.00325241	0.0164222	0.198049	0.0830609	801	184.687	616.313	NA	5	3	2	NA	NA	0.00628897	1.91101:1.91101:1:1:1:1	0.456305(0.496255:0.357678:0.514981)	NA	NA	NA	NA
	Unigene41693_All	Unigene26457_All	YN	0.00624559	0.0316091	0.197588	0.0393899	612	129.39	482.61	NA	7	4	3	NA	NA	0.011608	0.809431:0.809431:1:1:1:1	0.419118(0.441176:0.372549:0.443627)	NA	NA	NA	NA
	Unigene17001_All	Unigene5444_All	YN	0.00559056	0.0283088	0.197485	2.0372e-06	3165	830.555	2334.44	NA	36	23	13	NA	NA	0.0115523	3.33365:3.33365:1:1:1:1	0.410606(0.499091:0.382273:0.350455)	NA	NA	NA	NA
	Unigene1017_All	Unigene7140_All	YN	0.00369393	0.018729	0.197231	0.0824941	705	162.188	542.812	NA	5	3	2	NA	NA	0.0071528	1.88895:1.88895:1:1:1:1	0.385897(0.492308:0.371154:0.294231)	NA	NA	NA	NA
	Unigene30598_All	Unigene18973_All	YN	0.00716214	0.0363183	0.197205	0.0153236	843	141.459	701.541	NA	10	5	5	NA	NA	0.0120547	0.553077:0.553077:1:1:1:1	0.428803(0.522654:0.404531:0.359223)	NA	NA	NA	NA
	Unigene19437_All	Unigene8898_All	YN	0.00672293	0.0342538	0.196268	0.00624807	957	209.088	747.912	NA	12	7	5	NA	NA	0.012738	0.366103:0.366103:1:1:1:1	0.507837(0.590909:0.471787:0.460815)	NA	NA	NA	NA
	Unigene9893_All	Unigene45533_All	YN	0.00294505	0.0150397	0.195818	0.0812198	882	201.56	680.44	NA	5	3	2	NA	NA	0.00570899	2:2:1:1:1:1	0.416402(0.506349:0.406349:0.336508)	NA	NA	NA	NA
	Unigene36501_All	Unigene17457_All	YN	0.00681387	0.0348056	0.19577	0.00222408	1032	294.029	737.971	NA	15	10	5	NA	NA	0.014789	7.6553:7.6553:1:1:1:1	0.446705(0.491279:0.4375:0.411337)	NA	NA	NA	NA
	Unigene4901_All	Unigene23613_All	YN	0.0031295	0.0159939	0.195669	0.0572558	894	253.523	640.477	NA	6	4	2	NA	NA	0.00677761	1.86764:1.86764:1:1:1:1	0.519575(0.525168:0.521812:0.511745)	NA	NA	NA	NA
	Unigene19990_All	Unigene34131_All	YN	0.00311696	0.0159466	0.195462	0.0377658	1218	253.513	964.487	NA	7	4	3	NA	NA	0.00578731	1.01666:1.01666:1:1:1:1	0.416256(0.460591:0.359606:0.428571)	NA	NA	NA	NA
	Unigene22105_All	Unigene20888_All	YN	0.00354939	0.0181696	0.195348	0.0809292	732	167.142	564.858	NA	5	3	2	NA	NA	0.00688771	1.20097:1.20097:1:1:1:1	0.41735(0.454918:0.403689:0.393443)	NA	NA	NA	NA
	Unigene38438_All	Unigene33869_All	YN	0.00276524	0.0141587	0.195303	0.0808535	939	214.178	724.822	NA	5	3	2	NA	NA	0.00536399	2:2:1:1:1:1	0.421725(0.472843:0.42492:0.367412)	NA	NA	NA	NA
	Unigene16114_All	Unigene16499_All	YN	0.00324501	0.0166184	0.195267	0.0185932	1293	366.24	926.76	NA	9	6	3	NA	NA	0.00703298	6.55661:6.55661:1:1:1:1	0.411265(0.461806:0.375:0.396991)	NA	NA	NA	NA
	Unigene5052_All	Unigene4094_All	YN	0.0103429	0.05298	0.195223	5.04997e-05	1287	313.433	973.567	NA	26	16	10	NA	NA	0.0207266	2.20951:2.20951:1:1:1:1	0.413633(0.5:0.385439:0.35546)	NA	NA	NA	NA
	Unigene9517_All	Unigene24163_All	YN	0.00342835	0.0176021	0.19477	0.0374475	1107	229.923	877.077	NA	7	4	3	NA	NA	0.00637223	1.91267:1.91267:1:1:1:1	0.429991(0.544715:0.373984:0.371274)	NA	NA	NA	NA
	Unigene36325_All	Unigene33554_All	YN	0.00483148	0.0248191	0.194668	0.0254766	828	204.81	623.19	NA	8	5	3	NA	NA	0.0097755	2:2:1:1:1:1	0.424242(0.520202:0.378788:0.373737)	NA	NA	NA	NA
	Unigene9681_All	Unigene33830_All	YN	0.00287183	0.014761	0.194556	0.0800997	903	205.245	697.755	NA	5	3	2	NA	NA	0.00557414	2:2:1:1:1:1	0.421373(0.466777:0.416944:0.380399)	NA	NA	NA	NA
	Unigene36374_All	Unigene35969_All	YN	0.00412276	0.0212057	0.194418	0.0373591	921	191.308	729.692	NA	7	4	3	NA	NA	0.00767118	0.934658:0.934658:1:1:1:1	0.422367(0.506515:0.36645:0.394137)	NA	NA	NA	NA
	Unigene4650_All	Unigene3330_All	YN	0.00266784	0.0137223	0.194416	0.0802026	972	220.997	751.003	NA	5	3	2	NA	NA	0.00518122	2.98618:2.98618:1:1:1:1	0.419718(0.428169:0.477465:0.353521)	NA	NA	NA	NA
	Unigene73264_All	Unigene67149_All	YN	0.00232147	0.0119648	0.194025	0.0797433	1116	253.096	862.904	NA	5	3	2	NA	NA	0.00450847	2.14328:2.14328:1:1:1:1	0.417323(0.465879:0.459318:0.326772)	NA	NA	NA	NA
	Unigene29690_All	Unigene30231_All	YN	0.00352698	0.0181902	0.193894	0.00210774	1980	558.197	1421.8	NA	15	10	5	NA	NA	0.0076608	7.66082:7.66082:1:1:1:1	0.446072(0.51046:0.463738:0.364017)	NA	NA	NA	NA
	Unigene20686_All	Unigene18112_All	YN	0.00351353	0.0181413	0.193675	0.0795239	738	167.376	570.624	NA	5	3	2	NA	NA	0.00683107	2:2:1:1:1:1	0.432927(0.522358:0.406504:0.369919)	NA	NA	NA	NA
	Unigene19282_All	Unigene31836_All	YN	0.0046435	0.0240038	0.193449	0.0180255	903	254.64	648.36	NA	9	6	3	NA	NA	0.010103	3.0896:3.0896:1:1:1:1	0.426919(0.55205:0.312303:0.416404)	NA	NA	NA	NA
	Unigene17667_All	Unigene33233_All	YN	0.00475374	0.0246095	0.193167	0.0250063	840	206.86	633.14	NA	8	5	3	NA	NA	0.00964344	2.275:2.275:1:1:1:1	0.410714(0.517857:0.333929:0.380357)	NA	NA	NA	NA
	Unigene24270_All	Unigene2657_All	YN	0.00713209	0.0369258	0.193146	9.57063e-05	1800	391.131	1408.87	NA	24	14	10	NA	NA	0.0136061	1.79917:1.79917:1:1:1:1	0.422222(0.4925:0.406667:0.3675)	NA	NA	NA	NA
	Unigene16818_All	Unigene33119_All	YN	0.00690222	0.0357472	0.193084	0.0179775	609	172.097	436.903	NA	9	6	3	NA	NA	0.0150535	3.48817:3.48817:1:1:1:1	0.454023(0.522167:0.41133:0.428571)	NA	NA	NA	NA
	Unigene31300_All	Unigene33591_All	YN	0.00329296	0.0171004	0.192566	0.0549796	846	237.137	608.863	NA	6	4	2	NA	NA	0.00716324	2:2:1:1:1:1	0.444052(0.514134:0.393993:0.424028)	NA	NA	NA	NA
	Unigene14650_All	Unigene33776_All	YN	0.00338445	0.0175778	0.192541	0.0785694	765	172.677	592.323	NA	5	3	2	NA	NA	0.00658821	2:2:1:1:1:1	0.434641(0.521569:0.362745:0.419608)	NA	NA	NA	NA
	Unigene37185_All	Unigene33825_All	YN	0.00933087	0.0485334	0.192257	0.00101949	969	214.104	754.896	NA	17	10	7	NA	NA	0.0179928	0.94683:0.94683:1:1:1:1	0.431256(0.522255:0.384273:0.38724)	NA	NA	NA	NA
	Unigene3570_All	Unigene16416_All	YN	0.0025647	0.0133702	0.191822	0.054051	1083	301.847	781.153	NA	6	4	2	NA	NA	0.00557634	2:2:1:1:1:1	0.444892(0.508065:0.412634:0.413978)	NA	NA	NA	NA
	Unigene35776_All	Unigene15858_All	YN	0.00188249	0.00985304	0.191057	0.0535582	1473	409.166	1063.83	NA	6	4	2	NA	NA	0.00409653	7.64039:7.64039:1:1:1:1	0.397436(0.499038:0.333654:0.359615)	NA	NA	NA	NA
	Unigene25896_All	Unigene36678_All	YN	0.00203222	0.0106667	0.19052	0.00971124	1269	283.253	985.747	NA	5	3	2	NA	NA	0.00395953	2:2:1:1:1:1	0.446275(0.562353:0.370588:0.405882)	NA	NA	NA	NA
	Unigene42444_All	Unigene26646_All	YN	0.00193068	0.0101435	0.190337	0.0764336	1335	297.762	1037.24	NA	5	3	2	NA	NA	0.00376248	2:2:1:1:1:1	0.423596(0.504494:0.407865:0.358427)	NA	NA	NA	NA
	Unigene19247_All	Unigene5294_All	YN	0.00254277	0.013386	0.189958	0.0762791	1014	226.121	787.879	NA	5	3	2	NA	NA	0.00496079	2:2:1:1:1:1	0.422584(0.492604:0.424556:0.350592)	NA	NA	NA	NA
	Unigene40697_All	Unigene38840_All	YN	0.00256541	0.01351	0.189889	0.0762295	1005	224.063	780.937	NA	5	3	2	NA	NA	0.0050055	2:2:1:1:1:1	0.413433(0.480597:0.39403:0.365672)	NA	NA	NA	NA
	Unigene36084_All	Unigene38705_All	YN	0.00357159	0.0188283	0.189692	0.0531143	777	215.691	561.309	NA	6	4	2	NA	NA	0.00780677	4.3073:4.3073:1:1:1:1	0.424296(0.498239:0.366197:0.408451)	NA	NA	NA	NA
	Unigene2493_All	Unigene32261_All	YN	0.00811694	0.0428332	0.189501	0.00270582	936	192.798	743.202	NA	14	8	6	NA	NA	0.0152678	1.67797:1.67797:1:1:1:1	0.430245(0.517572:0.407348:0.365815)	NA	NA	NA	NA
	Unigene20786_All	Unigene34107_All	YN	0.0019204	0.0101426	0.18934	0.312276	720	198.609	521.391	NA	3	2	1	NA	NA	0.00418846	2.4615:2.4615:1:1:1:1	0.444444(0.50625:0.454167:0.372917)	NA	NA	NA	NA
	Unigene6312_All	Unigene27_All	YN	0.0102086	0.053996	0.189062	0.00180615	765	173.156	591.844	NA	15	9	6	NA	NA	0.0201198	1.61229:1.61229:1:1:1:1	0.43268(0.490196:0.386275:0.421569)	NA	NA	NA	NA
	Unigene36997_All	Unigene37993_All	YN	0.00695241	0.0368209	0.188817	8.60228e-05	1593	417.197	1175.8	NA	23	14.8667	8.13331	NA	NA	0.0147748	4.33624:4.33624:1:1:1:1	0.401489(0.469072:0.380584:0.354811)	NA	NA	NA	NA
	Unigene4748_All	Unigene20285_All	YN	0.00230192	0.0122315	0.188197	0.311714	600	164.913	435.087	NA	3	2	1	NA	NA	0.00503111	2.82119:2.82119:1:1:1:1	0.450833(0.5425:0.455:0.355)	NA	NA	NA	NA
	Unigene8312_All	Unigene21002_All	YN	0.00368459	0.0195976	0.188013	0.0340621	1023	206.785	816.215	NA	7	4	3	NA	NA	0.00690118	1.02107:1.02107:1:1:1:1	0.409091(0.460411:0.368035:0.398827)	NA	NA	NA	NA
	Unigene23263_All	Unigene58978_All	YN	0.00611079	0.0326173	0.187348	0.00528722	909	251.75	657.25	NA	12	8	4	NA	NA	0.0134518	4.47598:4.47598:1:1:1:1	0.417211(0.421569:0.400327:0.429739)	NA	NA	NA	NA
	Unigene36560_All	Unigene22817_All	YN	0.00406823	0.0217165	0.187333	0.000568346	2040	560.613	1479.39	NA	18	12	6	NA	NA	0.00891817	7.3397:7.3397:1:1:1:1	0.436275(0.535294:0.414706:0.358824)	NA	NA	NA	NA
	Unigene9108_All	Unigene8953_All	YN	0.00419035	0.0223897	0.187155	0.0511361	660	181.333	478.667	NA	6	4	2	NA	NA	0.00919058	2.00628:2.00628:1:1:1:1	0.475575(0.517241:0.398707:0.510776)	NA	NA	NA	NA
	Unigene28765_All	Unigene34013_All	YN	0.0043308	0.0231465	0.187104	0.00057452	1917	527.568	1389.43	NA	18	12	6	NA	NA	0.00950896	1.99446:1.99446:1:1:1:1	0.491654(0.535994:0.442879:0.496088)	NA	NA	NA	NA
	Unigene25790_All	Unigene40068_All	YN	0.00382308	0.0204365	0.187071	0.0223394	1035	248.008	786.992	NA	8	5	3	NA	NA	0.00780403	3.69911:3.69911:1:1:1:1	0.496135(0.542029:0.431884:0.514493)	NA	NA	NA	NA
	Unigene20416_All	Unigene14671_All	YN	0.00562936	0.0300946	0.187056	0.0107041	918	204.644	713.356	NA	10	6	4	NA	NA	0.0110833	2.66813:2.66813:1:1:1:1	0.450597(0.522801:0.454397:0.374593)	NA	NA	NA	NA
	Unigene7451_All	Unigene1735_All	YN	0.00500044	0.0267433	0.186979	4.87868e-05	2247	604.188	1642.81	NA	24	15.8141	8.1859	NA	NA	0.0108468	6.85437:6.85437:1:1:1:1	0.44679(0.515831:0.417546:0.406992)	NA	NA	NA	NA
	Unigene13806_All	Unigene20316_All	YN	0.00754103	0.0403349	0.18696	0.00164164	1029	229.186	799.814	NA	15	9	6	NA	NA	0.0148451	2:2:1:1:1:1	0.413496(0.539402:0.346467:0.35462)	NA	NA	NA	NA
	Unigene31288_All	Unigene33861_All	YN	0.00373821	0.0200011	0.1869	0.0159248	1110	305.221	804.779	NA	9	6	3	NA	NA	0.00821009	3.92791:3.92791:1:1:1:1	0.420966(0.488943:0.405405:0.36855)	NA	NA	NA	NA
	Unigene25608_All	Unigene22182_All	YN	0.00404599	0.0216858	0.186573	0.0739354	636	140.349	495.651	NA	5	3	2	NA	NA	0.00793865	2:2:1:1:1:1	0.421739(0.484783:0.397826:0.382609)	NA	NA	NA	NA
	Unigene24431_All	Unigene8807_All	YN	0.00305841	0.0164011	0.186476	0.0155143	1353	369.844	983.156	NA	9	6	3	NA	NA	0.00670565	3.90338:3.90338:1:1:1:1	0.448454(0.489691:0.4:0.45567)	NA	NA	NA	NA
	Unigene10751_All	Unigene37095_All	YN	0.00710913	0.0381897	0.186153	0.0058613	768	185.741	582.259	NA	11	6.88081	4.11919	NA	NA	0.014626	1.9483:1.9483:1:1:1:1	0.429858(0.559846:0.353282:0.376448)	NA	NA	NA	NA
	Unigene25618_All	Unigene20077_All	YN	0.0041268	0.022175	0.186101	0.0103749	1248	275.979	972.021	NA	10	6	4	NA	NA	0.00811793	2.90958:2.90958:1:1:1:1	0.454078(0.571259:0.47981:0.311164)	NA	NA	NA	NA
	Unigene30004_All	Unigene19273_All	YN	0.00371003	0.0199423	0.186038	0.0220458	1065	254.38	810.62	NA	8	5	3	NA	NA	0.00758718	1.97142:1.97142:1:1:1:1	0.433849(0.443299:0.435567:0.42268)	NA	NA	NA	NA
	Unigene40822_All	Unigene18362_All	YN	0.00187012	0.01006	0.185897	0.0728619	1371	300.216	1070.78	NA	5	3	2	NA	NA	0.0036635	2:2:1:1:1:1	0.422684(0.512035:0.393873:0.362144)	NA	NA	NA	NA
	Unigene16680_All	Unigene16116_All	YN	0.00330574	0.0177935	0.185783	0.0731112	777	170.608	606.392	NA	5	3	2	NA	NA	0.00648688	1.88172:1.88172:1:1:1:1	0.402778(0.482955:0.373106:0.352273)	NA	NA	NA	NA
	Unigene24004_All	Unigene20473_All	YN	0.0105004	0.0565865	0.185564	9.90778e-05	1047	278.71	768.29	NA	23	15	8	NA	NA	0.0227685	5.32142:5.32142:1:1:1:1	0.460733(0.543194:0.439791:0.399215)	NA	NA	NA	NA
	Unigene20274_All	Unigene23752_All	YN	0.00374985	0.0202237	0.185418	0.0154696	1104	301.871	802.129	NA	9	6	3	NA	NA	0.00825437	6.28271:6.28271:1:1:1:1	0.444303(0.489796:0.403061:0.440051)	NA	NA	NA	NA
	Unigene397_All	Unigene65216_All	YN	0.00563998	0.0304753	0.185068	0.00586417	1269	200.908	1068.09	NA	12	6	6	NA	NA	0.0095719	0.510712:0.510712:1:1:1:1	0.427909(0.448608:0.406852:0.428266)	NA	NA	NA	NA
	Unigene42388_All	Unigene23905_All	YN	0.00397791	0.0215016	0.185005	0.00105608	1986	473.501	1512.5	NA	16	10	6	NA	NA	0.00815591	3.05839:3.05839:1:1:1:1	0.429507(0.515106:0.382931:0.390483)	NA	NA	NA	NA
	Unigene19707_All	Unigene9936_All	YN	0.0026863	0.0145566	0.184541	0.071976	954	208.098	745.902	NA	5	3	2	NA	NA	0.0052756	1.94092:1.94092:1:1:1:1	0.417715(0.514151:0.356918:0.382075)	NA	NA	NA	NA
	Unigene36286_All	Unigene33202_All	YN	0.00136484	0.00740029	0.184431	0.309809	1005	271.647	733.353	NA	3	2	1	NA	NA	0.00299619	2.04138:2.04138:1:1:1:1	0.454726(0.497015:0.38806:0.479104)	NA	NA	NA	NA
	Unigene4108_All	Unigene26384_All	YN	0.00296633	0.0161195	0.184021	0.0490968	927	251.388	675.612	NA	6	4	2	NA	NA	0.00653326	2.39571:2.39571:1:1:1:1	0.44822(0.377023:0.519417:0.44822)	NA	NA	NA	NA
	Unigene21642_All	Unigene8416_All	YN	0.0020259	0.0110128	0.183959	0.0713824	1263	274.449	988.551	NA	5	3	2	NA	NA	0.00397874	1.11363:1.11363:1:1:1:1	0.4327(0.510689:0.375297:0.412114)	NA	NA	NA	NA
	Unigene29766_All	Unigene36733_All	YN	0.00344415	0.0187254	0.183929	0.00474889	1599	434.408	1164.59	NA	12	8	4	NA	NA	0.00759569	6.16408:6.16408:1:1:1:1	0.424015(0.461538:0.358349:0.452158)	NA	NA	NA	NA
	Unigene19025_All	Unigene12752_All	YN	0.00619919	0.0337398	0.183736	0.0152832	669	183.058	485.942	NA	9	6	3	NA	NA	0.0137351	2.37102:2.37102:1:1:1:1	0.481315(0.486547:0.43722:0.520179)	NA	NA	NA	NA
	Unigene8349_All	Unigene23543_All	YN	0.00544733	0.0296534	0.1837	0.00427529	1083	345.683	737.317	NA	14	10	4	NA	NA	0.0131737	9.64284:9.64284:1:1:1:1	0.475069(0.473684:0.429363:0.522161)	NA	NA	NA	NA
	Unigene36484_All	Unigene33903_All	YN	0.00367488	0.0200486	0.183299	0.00656655	1446	354.769	1091.23	NA	11	7	4	NA	NA	0.00769209	1.98379:1.98379:1:1:1:1	0.442254(0.490664:0.41805:0.41805)	NA	NA	NA	NA
	Unigene21740_All	Unigene40028_All	YN	0.00799012	0.0437496	0.182633	0.00100142	669	165.6	503.4	NA	11	7	4	NA	NA	0.0168418	2.29807:2.29807:1:1:1:1	0.437967(0.513453:0.430493:0.369955)	NA	NA	NA	NA
	Unigene7847_All	Unigene6591_All	YN	0.00261794	0.0143511	0.182421	0.047715	1047	281.495	765.505	NA	6	4	2	NA	NA	0.0057725	4.91004:4.91004:1:1:1:1	0.439828(0.514327:0.422636:0.382521)	NA	NA	NA	NA
	Unigene39546_All	Unigene22117_All	YN	0.00599208	0.032851	0.182402	0.000364522	1413	407.15	1005.85	NA	19	13	6	NA	NA	0.0137314	6.93326:6.93326:1:1:1:1	0.431352(0.509554:0.359873:0.424628)	NA	NA	NA	NA
	Unigene42811_All	Unigene33698_All	YN	0.00187703	0.0103024	0.182194	0.308767	729	195.577	533.423	NA	3	2	1	NA	NA	0.00413739	2:2:1:1:1:1	0.449057(0.467925:0.507547:0.371698)	NA	NA	NA	NA
	Unigene19302_All	Unigene5608_All	YN	0.00133584	0.00734564	0.181855	0.308549	1023	273.656	749.344	NA	3	2	1	NA	NA	0.00294348	2:2:1:1:1:1	0.440442(0.442363:0.430836:0.448127)	NA	NA	NA	NA
	Unigene4707_All	Unigene2014_All	YN	0.00300624	0.0165317	0.181847	0.0476498	912	245.209	666.791	NA	6	4	2	NA	NA	0.00664283	4.37766:4.37766:1:1:1:1	0.428783(0.514837:0.418398:0.353116)	NA	NA	NA	NA
	Unigene19107_All	Unigene25451_All	YN	0.00162742	0.0089508	0.181819	0.308519	840	224.78	615.22	NA	3	2	1	NA	NA	0.00358712	2:2:1:1:1:1	0.47658(0.5:0.437908:0.49183)	NA	NA	NA	NA
	Unigene122791_All	Unigene79546_All	YN	0.00188371	0.0103607	0.181814	0.308518	726	194.374	531.626	NA	3	2	1	NA	NA	0.00415327	2:2:1:1:1:1	0.460317(0.56746:0.376984:0.436508)	NA	NA	NA	NA
	Unigene40287_All	Unigene14137_All	YN	0.00414053	0.0228139	0.181492	0.0477463	663	178.59	484.41	NA	6	4	2	NA	NA	0.00917051	1.86188:1.86188:1:1:1:1	0.460489(0.50431:0.413793:0.463362)	NA	NA	NA	NA
	Unigene34987_All	Unigene38396_All	YN	0.0102516	0.0566343	0.181014	0.0030504	639	147.815	491.185	NA	13	8	5	NA	NA	0.0209809	1.52319:1.52319:1:1:1:1	0.470266(0.497653:0.408451:0.504695)	NA	NA	NA	NA
	Unigene495_All	Unigene39692_All	YN	0.00698997	0.0386312	0.180941	0.00938905	735	160.047	574.953	NA	10	6	4	NA	NA	0.0138799	1.0071:1.0071:1:1:1:1	0.436387(0.492366:0.448473:0.368321)	NA	NA	NA	NA
	Unigene7043_All	Unigene36178_All	YN	0.00169809	0.00938521	0.180933	0.308106	804	214.437	589.563	NA	3	2	1	NA	NA	0.00374835	2:2:1:1:1:1	0.468284(0.494403:0.440299:0.470149)	NA	NA	NA	NA
	Unigene37839_All	Unigene37165_All	YN	0.00776549	0.042925	0.180908	0.00331321	735	217.122	517.878	NA	13	9	4	NA	NA	0.0181517	5.90665:5.90665:1:1:1:1	0.433735(0.524096:0.385542:0.391566)	NA	NA	NA	NA
	Unigene48654_All	Unigene33514_All	YN	0.00613662	0.0339292	0.180865	0.014032	672	180.869	491.131	NA	9	6	3	NA	NA	0.013617	3.9103:3.9103:1:1:1:1	0.427083(0.482143:0.388393:0.410714)	NA	NA	NA	NA
	Unigene39186_All	Unigene16292_All	YN	0.00289616	0.016022	0.180761	0.0469221	945	252.928	692.072	NA	6	4	2	NA	NA	0.00640928	3.77702:3.77702:1:1:1:1	0.437566(0.504762:0.444444:0.363492)	NA	NA	NA	NA
	Unigene25587_All	Unigene10379_All	YN	0.00850745	0.0470797	0.180703	0.000645544	951	241.595	709.405	NA	17	11	6	NA	NA	0.0183064	1.7644:1.7644:1:1:1:1	0.448835(0.466565:0.487842:0.392097)	NA	NA	NA	NA
	Unigene36020_All	Unigene15582_All	YN	0.00496117	0.0274769	0.180558	0.00915784	1032	223.017	808.983	NA	10	6	4	NA	NA	0.00982686	1.21802:1.21802:1:1:1:1	0.428779(0.572674:0.361919:0.351744)	NA	NA	NA	NA
	Unigene24830_All	Unigene56809_All	YN	0.00557533	0.0308834	0.180528	0.000452536	1479	398.304	1080.7	NA	18	12	6	NA	NA	0.012391	3.9864:3.9864:1:1:1:1	0.447799(0.587736:0.39717:0.358491)	NA	NA	NA	NA
	Unigene18777_All	Unigene9015_All	YN	0.00171889	0.00953632	0.180246	0.0461312	1587	422.121	1164.88	NA	6	4	2	NA	NA	0.00379822	2:2:1:1:1:1	0.469554(0.531073:0.417137:0.460452)	NA	NA	NA	NA
	Unigene38397_All	Unigene16384_All	YN	0.00384649	0.0213572	0.180103	0.030315	972	190.036	781.964	NA	7	4	3	NA	NA	0.00727001	0.904023:0.904023:1:1:1:1	0.443416(0.555556:0.364198:0.410494)	NA	NA	NA	NA
	Unigene22999_All	Unigene64667_All	YN	0.00693163	0.0385397	0.179857	0.0028677	939	214.262	724.738	NA	13	8	5	NA	NA	0.014144	1.67533:1.67533:1:1:1:1	0.437313(0.516418:0.441791:0.353731)	NA	NA	NA	NA
	Unigene19532_All	Unigene3976_All	YN	0.00336885	0.0187318	0.179847	0.00891129	1515	324.947	1190.05	NA	10	6	4	NA	NA	0.00666399	1.18639:1.18639:1:1:1:1	0.432013(0.505941:0.390099:0.4)	NA	NA	NA	NA
	Unigene36230_All	Unigene39397_All	YN	0.00284033	0.0158311	0.179415	0.00873481	1794	383.014	1410.99	NA	10	6	4	NA	NA	0.00561383	0.968721:0.968721:1:1:1:1	0.431438(0.513378:0.424749:0.356187)	NA	NA	NA	NA
	Unigene36543_All	Unigene40440_All	YN	0.00101417	0.00566872	0.178907	0.307139	1341	354.218	986.782	NA	3	2	1	NA	NA	0.00224365	2:2:1:1:1:1	0.490679(0.559284:0.489933:0.422819)	NA	NA	NA	NA
	Unigene20555_All	Unigene33739_All	YN	0.00249484	0.0139456	0.178897	0.00410463	2187	580.845	1606.15	NA	12	8	4	NA	NA	0.00553605	4.49046:4.49046:1:1:1:1	0.42684(0.528121:0.328532:0.423868)	NA	NA	NA	NA
	Unigene14406_All	Unigene25078_All	YN	0.00418061	0.0233825	0.178792	0.0022028	1395	435.007	959.993	NA	14	10	4	NA	NA	0.0101684	5.32117:5.32117:1:1:1:1	0.492248(0.551797:0.476744:0.448203)	NA	NA	NA	NA
	Unigene39634_All	Unigene6746_All	YN	0.00659288	0.036886	0.178736	0.0135635	624	166.96	457.04	NA	9	6	3	NA	NA	0.0146982	1.75012:1.75012:1:1:1:1	0.483173(0.519231:0.475962:0.454327)	NA	NA	NA	NA
	Unigene39404_All	Unigene19909_All	YN	0.00242909	0.0136035	0.178564	0.0453777	1122	297.269	824.731	NA	6	4	2	NA	NA	0.0053897	2.01636:2.01636:1:1:1:1	0.468806(0.481283:0.430481:0.494652)	NA	NA	NA	NA
	Unigene16279_All	Unigene36858_All	YN	0.00169193	0.00948484	0.178383	0.306877	804	212.199	591.801	NA	3	2	1	NA	NA	0.00374871	2:2:1:1:1:1	0.454812(0.454225:0.489437:0.420775)	NA	NA	NA	NA
	Unigene47483_All	Unigene7495_All	YN	0.00572919	0.0321408	0.178253	0.00291979	987	286.061	700.939	NA	13	9	4	NA	NA	0.013384	2.04756:2.04756:1:1:1:1	0.486355(0.511696:0.524854:0.422515)	NA	NA	NA	NA
	Unigene10012_All	Unigene7799_All	YN	0.00535705	0.0300541	0.178247	0.019205	732	169.722	562.278	NA	8	5	3	NA	NA	0.0110833	2:2:1:1:1:1	0.419399(0.485656:0.383197:0.389344)	NA	NA	NA	NA
	Unigene5442_All	Unigene51168_All	YN	0.00218123	0.0122379	0.178236	0.306806	624	164.763	459.237	NA	3	2	1	NA	NA	0.00483664	2:2:1:1:1:1	0.467742(0.5553:0.460829:0.387097)	NA	NA	NA	NA
	Unigene42747_All	Unigene7092_All	YN	0.00204394	0.0114689	0.178215	0.0450405	1332	351.995	980.005	NA	6	4	2	NA	NA	0.00453459	2:2:1:1:1:1	0.47485(0.55518:0.434685:0.434685)	NA	NA	NA	NA
	Unigene30008_All	Unigene16490_All	YN	0.00574923	0.032282	0.178094	0.000589609	1398	350.328	1047.67	NA	17	11	6	NA	NA	0.0123981	3.11224:3.11224:1:1:1:1	0.441595(0.487179:0.441239:0.396368)	NA	NA	NA	NA
	Unigene5876_All	Unigene71395_All	YN	0.00730352	0.0410323	0.177994	0.00182355	915	226.208	688.792	NA	14	9	5	NA	NA	0.015642	4.68779:4.68779:1:1:1:1	0.430601(0.488525:0.408197:0.395082)	NA	NA	NA	NA
	Unigene7195_All	Unigene16365_All	YN	0.00865006	0.0486271	0.177885	0.000993112	1008	193.869	814.131	NA	16	9	7	NA	NA	0.0163389	0.471249:0.471249:1:1:1:1	0.454635(0.501479:0.522189:0.340237)	NA	NA	NA	NA
	Unigene16897_All	Unigene20794_All	YN	0.0016586	0.00934621	0.177462	0.306443	819	215.327	603.673	NA	3	2	1	NA	NA	0.00367978	2:2:1:1:1:1	0.446276(0.545788:0.386447:0.406593)	NA	NA	NA	NA
	Unigene22576_All	Unigene84_All	YN	0.00619419	0.0349198	0.177383	0.00412857	885	236.472	648.528	NA	12	8	4	NA	NA	0.0138697	4.03536:4.03536:1:1:1:1	0.462147(0.545763:0.50339:0.337288)	NA	NA	NA	NA
	Unigene18482_All	Unigene27091_All	YN	0.00239241	0.0134921	0.177319	0.0445744	1137	299.689	837.311	NA	6	4	2	NA	NA	0.00531807	2.20496:2.20496:1:1:1:1	0.432278(0.496042:0.361478:0.439314)	NA	NA	NA	NA
	Unigene21661_All	Unigene62633_All	YN	0.00323738	0.018346	0.176462	0.0126305	1260	331.063	928.937	NA	9	6	3	NA	NA	0.00720714	3.82718:3.82718:1:1:1:1	0.427877(0.504484:0.367713:0.411435)	NA	NA	NA	NA
	Unigene17278_All	Unigene4891_All	YN	0.00333224	0.0189415	0.175923	0.000364071	2448	643.235	1804.77	NA	18	12	6	NA	NA	0.00743371	3.07133:3.07133:1:1:1:1	0.46213(0.54921:0.425881:0.4113)	NA	NA	NA	NA
	Unigene39471_All	Unigene34889_All	YN	0.00701914	0.0399162	0.175847	0.00122124	975	259.051	715.949	NA	15	10	5	NA	NA	0.0157597	3.32781:3.32781:1:1:1:1	0.447179(0.541538:0.401538:0.398462)	NA	NA	NA	NA
	Unigene9916_All	Unigene19112_All	YN	0.00308956	0.0175747	0.175796	0.0435113	879	230.277	648.723	NA	6	4	2	NA	NA	0.00688432	2:2:1:1:1:1	0.410694(0.453925:0.317406:0.460751)	NA	NA	NA	NA
	Unigene6001_All	Unigene25114_All	YN	0.00424185	0.0241731	0.175478	0.00912429	1005	295.76	709.24	NA	10	7	3	NA	NA	0.0101074	13.1312:13.1312:1:1:1:1	0.433729(0.583086:0.35905:0.35905)	NA	NA	NA	NA
	Unigene36379_All	Unigene23211_All	YN	0.00143671	0.0082004	0.1752	0.305421	942	245.3	696.7	NA	3	2	1	NA	NA	0.003198	2.09706:2.09706:1:1:1:1	0.441511(0.464286:0.381988:0.478261)	NA	NA	NA	NA
	Unigene36487_All	Unigene39554_All	YN	0.000813931	0.00466929	0.174316	0.155431	1659	429.727	1229.27	NA	3	2	1	NA	NA	0.00181258	2:2:1:1:1:1	0.436709(0.452984:0.426763:0.43038)	NA	NA	NA	NA
	Unigene40582_All	Unigene1256_All	YN	0.00348925	0.0200255	0.174241	0.0425995	777	202.424	574.576	NA	6	4	2	NA	NA	0.00779727	2.0925:2.0925:1:1:1:1	0.470399(0.608108:0.413127:0.389961)	NA	NA	NA	NA
	Unigene36383_All	Unigene22537_All	YN	0.00312512	0.017947	0.174131	0.0425455	867	225.69	641.31	NA	6	4	2	NA	NA	0.00698343	2.06788:2.06788:1:1:1:1	0.453735(0.464883:0.444816:0.451505)	NA	NA	NA	NA
	Unigene24241_All	Unigene37482_All	YN	0.00317495	0.0182416	0.17405	0.0121596	1281	334.101	946.899	NA	9	6	3	NA	NA	0.00710451	7.35128:7.35128:1:1:1:1	0.41369(0.504464:0.382813:0.353795)	NA	NA	NA	NA
	Unigene31037_All	Unigene4518_All	YN	0.00257095	0.0148027	0.173681	0.0635278	984	204.672	779.328	NA	5	3	2	NA	NA	0.00511516	1.63423:1.63423:1:1:1:1	0.398017(0.528329:0.305949:0.359773)	NA	NA	NA	NA
	Unigene18917_All	Unigene29292_All	YN	0.00857178	0.0494177	0.173456	0.00377967	639	169.151	469.849	NA	12	8	4	NA	NA	0.0193842	6.46402:6.46402:1:1:1:1	0.428795(0.495305:0.441315:0.349765)	NA	NA	NA	NA
	Unigene2188_All	Unigene2607_All	YN	0.00403773	0.0233116	0.173207	0.00632654	1077	248.33	828.67	NA	9	5.6663	3.3337	NA	NA	0.00848182	2:2:1:1:1:1	0.415974(0.479224:0.398892:0.369806)	NA	NA	NA	NA
	Unigene36404_All	Unigene25833_All	YN	0.00460934	0.0266277	0.173104	0.00166237	1062	191.528	870.472	NA	9	5	4	NA	NA	0.00858027	6.32656:6.32656:1:1:1:1	0.382456(0.382895:0.344737:0.419737)	NA	NA	NA	NA
	Unigene34579_All	Unigene27205_All	YN	0.00294614	0.0170284	0.173014	0.0300894	978	297.813	680.187	NA	7	5	2	NA	NA	0.00723435	7.33149:7.33149:1:1:1:1	0.431911(0.553354:0.352134:0.390244)	NA	NA	NA	NA
	Unigene34630_All	Unigene15887_All	YN	0.00387439	0.0223993	0.17297	0.0419665	699	181.412	517.588	NA	6	4	2	NA	NA	0.00868216	2:2:1:1:1:1	0.45258(0.502092:0.422594:0.433054)	NA	NA	NA	NA
	Unigene40709_All	Unigene26978_All	YN	0.00453436	0.0262432	0.172782	0.000739887	1533	426.949	1106.05	NA	16	11	5	NA	NA	0.0105804	2.08596:2.08596:1:1:1:1	0.498369(0.571429:0.433464:0.490215)	NA	NA	NA	NA
	Unigene29480_All	Unigene26585_All	YN	0.00724124	0.0419924	0.172441	0.000195497	1161	288.967	872.033	NA	18	11.7169	6.28307	NA	NA	0.0158906	1.80111:1.80111:1:1:1:1	0.431133(0.518337:0.420538:0.354523)	NA	NA	NA	NA
	Unigene19333_All	Unigene37465_All	YN	0.0048	0.0278363	0.172436	0.0272413	774	146.956	627.044	NA	7	4	3	NA	NA	0.00917381	1.16656:1.16656:1:1:1:1	0.433584(0.454887:0.398496:0.447368)	NA	NA	NA	NA
	Unigene22436_All	Unigene26621_All	YN	0.00544715	0.0316224	0.172256	0.00244965	1029	291.458	737.542	NA	13	9	4	NA	NA	0.0128611	4.85089:4.85089:1:1:1:1	0.397297(0.482432:0.324324:0.385135)	NA	NA	NA	NA
	Unigene35792_All	Unigene16397_All	YN	0.00247675	0.01438	0.172236	0.00377184	1161	351.879	809.121	NA	7	5	2	NA	NA	0.00608442	6.77931:6.77931:1:1:1:1	0.451157(0.530848:0.417738:0.404884)	NA	NA	NA	NA
	Unigene9405_All	Unigene491_All	YN	0.00567314	0.0329923	0.171953	0.00145651	1164	278.894	885.106	NA	14	9	5	NA	NA	0.0122188	0.992367:0.992367:1:1:1:1	0.471014(0.530691:0.418159:0.464194)	NA	NA	NA	NA
	Unigene19004_All	Unigene33784_All	YN	0.00482008	0.0280334	0.171941	0.0115649	843	218.261	624.739	NA	9	6	3	NA	NA	0.0108302	2:2:1:1:1:1	0.485765(0.574733:0.530249:0.352313)	NA	NA	NA	NA
	Unigene25379_All	Unigene9045_All	YN	0.00405446	0.0235921	0.171857	0.00100126	1668	431.153	1236.85	NA	15	10	5	NA	NA	0.00910464	2.75013:2.75013:1:1:1:1	0.491906(0.52518:0.42446:0.526079)	NA	NA	NA	NA
	Unigene42125_All	Unigene33573_All	YN	0.00133181	0.00775295	0.171781	0.152831	1011	259.379	751.621	NA	3	2	1	NA	NA	0.0029792	2.86792:2.86792:1:1:1:1	0.470821(0.615727:0.462908:0.333828)	NA	NA	NA	NA
	Unigene4905_All	Unigene1180_All	YN	0.00350326	0.0203987	0.171739	0.00501791	771	198.769	572.231	NA	6	4	2	NA	NA	0.00785904	2:2:1:1:1:1	0.397829(0.404215:0.377395:0.411877)	NA	NA	NA	NA
	Unigene9334_All	Unigene25147_All	YN	0.00347509	0.020263	0.1715	0.029395	828	250.954	577.046	NA	7	5	2	NA	NA	0.00856324	6.06261:6.06261:1:1:1:1	0.472826(0.512681:0.469203:0.436594)	NA	NA	NA	NA
	Unigene29457_All	Unigene30239_All	YN	0.0110207	0.0643906	0.171154	0.000107365	870	229.972	640.028	NA	21	14	7	NA	NA	0.0251283	2.8219:2.8219:1:1:1:1	0.425287(0.460345:0.327586:0.487931)	NA	NA	NA	NA
	Unigene27914_All	Unigene32500_All	YN	0.00435499	0.0254585	0.171062	0.0411564	621	160.37	460.63	NA	6	4	2	NA	NA	0.00980489	1.94736:1.94736:1:1:1:1	0.483897(0.548309:0.475845:0.427536)	NA	NA	NA	NA
	Unigene39920_All	Unigene19319_All	YN	0.00311192	0.0182073	0.170916	0.0407422	867	222.915	644.085	NA	6	4	2	NA	NA	0.00699311	2.2522:2.2522:1:1:1:1	0.468468(0.543919:0.400338:0.461149)	NA	NA	NA	NA
	Unigene20632_All	Unigene735_All	YN	0.0026676	0.0156154	0.170832	0.00473141	1956	453.812	1502.19	NA	11	7	4	NA	NA	0.00567162	2.19743:2.19743:1:1:1:1	0.414063(0.459517:0.423295:0.359375)	NA	NA	NA	NA
	Unigene26255_All	Unigene23393_All	YN	0.00580368	0.0340072	0.170661	0.0062117	813	267.565	545.435	NA	12	8.84824	3.15176	NA	NA	0.0150857	8.54956:8.54956:1:1:1:1	0.49033(0.564846:0.447099:0.459044)	NA	NA	NA	NA
	Unigene1403_All	Unigene2649_All	YN	0.0010611	0.00622109	0.170565	0.0060573	1266	322.822	943.178	NA	3	2	1	NA	NA	0.00237686	2:2:1:1:1:1	0.460111(0.541469:0.436019:0.402844)	NA	NA	NA	NA
	Unigene19263_All	Unigene27699_All	YN	0.00363525	0.0213347	0.170391	0.000128122	2778	571.891	2206.11	NA	20	12	8	NA	NA	0.00727893	1.07929:1.07929:1:1:1:1	0.426653(0.540289:0.385847:0.353822)	NA	NA	NA	NA
	Unigene3124_All	Unigene26745_All	YN	0.0040683	0.0239911	0.169575	0.0401904	663	170.005	492.995	NA	6	4	2	NA	NA	0.00917688	2.67385:2.67385:1:1:1:1	0.44721(0.527149:0.418552:0.395928)	NA	NA	NA	NA
	Unigene35223_All	Unigene16027_All	YN	0.00167629	0.0098868	0.169549	0.150474	801	203.687	597.313	NA	3	2	1	NA	NA	0.00376415	2.12843:2.12843:1:1:1:1	0.469435(0.576125:0.434256:0.397924)	NA	NA	NA	NA
	Unigene35908_All	Unigene26640_All	YN	0.00372572	0.0219848	0.169468	0.0161444	1038	230.779	807.221	NA	8	5	3	NA	NA	0.00778527	0.978061:0.978061:1:1:1:1	0.45774(0.595442:0.47151:0.306268)	NA	NA	NA	NA
	Unigene26211_All	Unigene27247_All	YN	0.00660446	0.0389841	0.169414	0.0111374	615	158.49	456.51	NA	9	6	3	NA	NA	0.0149489	3.75653:3.75653:1:1:1:1	0.421951(0.470732:0.429268:0.365854)	NA	NA	NA	NA
	Unigene41160_All	Unigene34258_All	YN	0.0053645	0.0317092	0.169178	0.0111438	756	194.506	561.494	NA	9	6	3	NA	NA	0.0121425	2.18852:2.18852:1:1:1:1	0.475529(0.551587:0.448413:0.426587)	NA	NA	NA	NA
	Unigene28031_All	Unigene63297_All	YN	0.0102137	0.0603912	0.169126	0.000107131	852	259.404	592.596	NA	21	15	6	NA	NA	0.025491	8.57749:8.57749:1:1:1:1	0.412141(0.480831:0.346645:0.408946)	NA	NA	NA	NA
	Unigene24721_All	Unigene18445_All	YN	0.00439652	0.0260057	0.16906	0.00462965	1188	275.369	912.631	NA	11	7	4	NA	NA	0.00940535	2.07968:2.07968:1:1:1:1	0.436027(0.517677:0.380051:0.410354)	NA	NA	NA	NA
	Unigene21232_All	Unigene15860_All	YN	0.0074602	0.0441818	0.168852	0.00223735	750	210.613	539.387	NA	13	9	4	NA	NA	0.0177723	3.44252:3.44252:1:1:1:1	0.503831(0.641762:0.404215:0.465517)	NA	NA	NA	NA
	Unigene40405_All	Unigene21928_All	YN	0.00796448	0.047182	0.168803	0.00322844	681	176.099	504.901	NA	12	8	4	NA	NA	0.0181057	2.86585:2.86585:1:1:1:1	0.449339(0.557269:0.359031:0.431718)	NA	NA	NA	NA
	Unigene38867_All	Unigene4418_All	YN	0.00444179	0.0263582	0.168516	0.000650309	1557	427.706	1129.29	NA	16	11	5	NA	NA	0.0104622	6.66067:6.66067:1:1:1:1	0.430262(0.478887:0.393474:0.418426)	NA	NA	NA	NA
	Unigene28639_All	Unigene37260_All	YN	0.00104037	0.00617663	0.168436	0.148881	1287	325.136	961.864	NA	3	2	1	NA	NA	0.00233795	2:2:1:1:1:1	0.421652(0.505342:0.391026:0.36859)	NA	NA	NA	NA
	Unigene19548_All	Unigene51756_All	YN	0.00119547	0.00710222	0.168323	0.0386965	2241	566.418	1674.58	NA	6	4	2	NA	NA	0.00268841	6.86299:6.86299:1:1:1:1	0.423249(0.518742:0.398929:0.352075)	NA	NA	NA	NA
	Unigene27473_All	Unigene6633_All	YN	0.00804924	0.0478285	0.168294	5.63421e-05	1200	324.218	875.782	NA	22	15	7	NA	NA	0.0187969	9.51907:9.51907:1:1:1:1	0.422442(0.517327:0.413366:0.336634)	NA	NA	NA	NA
	Unigene5_All	Unigene1774_All	YN	0.00112382	0.00668506	0.168109	0.148551	1191	300.51	890.49	NA	3	2	1	NA	NA	0.00252702	2:2:1:1:1:1	0.45466(0.513854:0.414358:0.435768)	NA	NA	NA	NA
	Unigene4121_All	Unigene681_All	YN	0.00678452	0.0404757	0.16762	0.000565019	1143	254.476	888.524	NA	16	10	6	NA	NA	0.0142855	1.89602:1.89602:1:1:1:1	0.385113(0.425971:0.360437:0.368932)	NA	NA	NA	NA
	Unigene33149_All	Unigene67784_All	YN	0.00588984	0.0351408	0.167607	0.00763457	717	205.39	511.61	NA	10	7	3	NA	NA	0.014269	5.12606:5.12606:1:1:1:1	0.481172(0.583682:0.401674:0.458159)	NA	NA	NA	NA
	Unigene19493_All	Unigene39150_All	YN	0.00373234	0.0222744	0.167562	0.00205065	1485	410.081	1074.92	NA	13	9	4	NA	NA	0.00885271	5.62499:5.62499:1:1:1:1	0.432997(0.513131:0.39899:0.386869)	NA	NA	NA	NA
	Unigene19481_All	Unigene26817_All	YN	0.00245982	0.0147185	0.167125	0.0381382	1089	274.553	814.447	NA	6	4	2	NA	NA	0.00555041	1.92696:1.92696:1:1:1:1	0.445363(0.527548:0.384298:0.424242)	NA	NA	NA	NA
	Unigene19237_All	Unigene30008_All	YN	0.00176952	0.0105981	0.166966	0.147613	756	190.12	565.88	NA	3	2	1	NA	NA	0.00398976	2:2:1:1:1:1	0.435294(0.576471:0.333333:0.396078)	NA	NA	NA	NA
	Unigene41058_All	Unigene40471_All	YN	0.00177607	0.0106407	0.166913	0.147515	753	189.294	563.706	NA	3	2	1	NA	NA	0.00400452	2:2:1:1:1:1	0.458831(0.563745:0.390438:0.422311)	NA	NA	NA	NA
	Unigene36415_All	Unigene33694_All	YN	0.00444321	0.0267139	0.166326	0.00719808	945	267.554	677.446	NA	10	7	3	NA	NA	0.0107486	3.51113:3.51113:1:1:1:1	0.466667(0.566667:0.392063:0.44127)	NA	NA	NA	NA
	Unigene21458_All	Unigene16752_All	YN	0.00798475	0.0480186	0.166284	0.000579545	867	236.621	630.379	NA	16	11	5	NA	NA	0.0189108	6.3165:6.3165:1:1:1:1	0.434256(0.562284:0.382353:0.358131)	NA	NA	NA	NA
	Unigene39532_All	Unigene40307_All	YN	0.0082566	0.04974	0.165995	0.000111515	1125	272.496	852.504	NA	20	13	7	NA	NA	0.0183047	1.77312:1.77312:1:1:1:1	0.426667(0.525333:0.402667:0.352)	NA	NA	NA	NA
	Unigene20773_All	Unigene36787_All	YN	0.00577256	0.0348002	0.165877	0.0102271	699	177.037	521.963	NA	9	6	3	NA	NA	0.0131244	4.03629:4.03629:1:1:1:1	0.397487(0.539683:0.315476:0.337302)	NA	NA	NA	NA
	Unigene42191_All	Unigene1963_All	YN	0.00493577	0.0297604	0.16585	0.00119385	1326	309.357	1016.64	NA	14	9	5	NA	NA	0.0107274	2.9309:2.9309:1:1:1:1	0.463424(0.582579:0.478507:0.329186)	NA	NA	NA	NA
	Unigene28987_All	Unigene37553_All	YN	0.00317363	0.0191395	0.165815	0.0265109	897	265.425	631.575	NA	7	5	2	NA	NA	0.00789797	10.3247:10.3247:1:1:1:1	0.409276(0.475535:0.388379:0.363914)	NA	NA	NA	NA
	Unigene8238_All	Unigene25410_All	YN	0.00105044	0.00635374	0.165327	0.145509	1269	316.353	952.647	NA	3	2	1	NA	NA	0.00237252	2:2:1:1:1:1	0.440898(0.549645:0.425532:0.347518)	NA	NA	NA	NA
	Unigene38159_All	Unigene24075_All	YN	0.00359912	0.0217753	0.165284	0.0374802	744	186.923	557.077	NA	6	4	2	NA	NA	0.00816572	4.41748:4.41748:1:1:1:1	0.439516(0.520161:0.381048:0.417339)	NA	NA	NA	NA
	Unigene59710_All	Unigene28836_All	YN	0.00370679	0.022431	0.165254	0.026359	768	227.116	540.884	NA	7	5	2	NA	NA	0.00924397	7.22848:7.22848:1:1:1:1	0.442966(0.534221:0.387833:0.406844)	NA	NA	NA	NA
	Unigene22858_All	Unigene21397_All	YN	0.00216477	0.0131105	0.165117	0.0240055	1317	291.276	1025.72	NA	6	3.78392	2.21608	NA	NA	0.0045856	2.2479:2.2479:1:1:1:1	0.433941(0.514806:0.398633:0.388383)	NA	NA	NA	NA
	Unigene1497_All	Unigene37684_All	YN	0.00553667	0.033542	0.165067	9.00997e-06	2154	521.704	1632.3	NA	26	17	9	NA	NA	0.0123196	4.85864:4.85864:1:1:1:1	0.43363(0.538804:0.439567:0.322519)	NA	NA	NA	NA
	Unigene34960_All	Unigene19303_All	YN	0.00282974	0.0171519	0.164981	0.00974847	1416	353.83	1062.17	NA	9	6	3	NA	NA	0.00640857	2:2:1:1:1:1	0.435381(0.503178:0.429025:0.373941)	NA	NA	NA	NA
	Unigene29915_All	Unigene7860_All	YN	0.00326577	0.0198076	0.164875	0.00272758	1638	410.471	1227.53	NA	12	8	4	NA	NA	0.00741103	1.62334:1.62334:1:1:1:1	0.425484(0.517065:0.380546:0.37884)	NA	NA	NA	NA
	Unigene21893_All	Unigene27034_All	YN	0.00410901	0.0249819	0.16448	0.0368879	651	162.93	488.07	NA	6	4	2	NA	NA	0.00933301	2:2:1:1:1:1	0.536866(0.557604:0.486175:0.56682)	NA	NA	NA	NA
	Unigene4253_All	Unigene33777_All	YN	0.0048926	0.0297827	0.164277	0.00994651	822	206.826	615.174	NA	9	6	3	NA	NA	0.0111553	2.07991:2.07991:1:1:1:1	0.431306(0.538851:0.405405:0.349662)	NA	NA	NA	NA
	Unigene9356_All	Unigene38199_All	YN	0.00988075	0.0601963	0.164142	6.98312e-05	957	243.795	713.205	NA	21	14	7	NA	NA	0.0226986	2.37656:2.37656:1:1:1:1	0.438349(0.537618:0.358934:0.418495)	NA	NA	NA	NA
	Unigene19397_All	Unigene37944_All	YN	0.00490765	0.0299048	0.164109	0.00613444	1023	204.737	818.263	NA	10	6	4	NA	NA	0.00991044	1.07293:1.07293:1:1:1:1	0.460899(0.571848:0.394428:0.416422)	NA	NA	NA	NA
	Unigene31433_All	Unigene1730_All	YN	0.00552756	0.033695	0.164047	0.00622814	909	182.628	726.372	NA	10	6	4	NA	NA	0.0111867	0.925552:0.925552:1:1:1:1	0.457646(0.491749:0.39604:0.485149)	NA	NA	NA	NA
	Unigene62634_All	Unigene22328_All	YN	0.00317622	0.0193929	0.163782	0.0362483	840	208.939	631.061	NA	6	4	2	NA	NA	0.00720991	1.91191:1.91191:1:1:1:1	0.45(0.528333:0.421667:0.4)	NA	NA	NA	NA
	Unigene1844_All	Unigene1719_All	YN	0.00393086	0.0240434	0.16349	0.00964793	1020	254.797	765.203	NA	9	6	3	NA	NA	0.008955	1.59252:1.59252:1:1:1:1	0.457967(0.442815:0.450147:0.480938)	NA	NA	NA	NA
	Unigene67840_All	Unigene6122_All	YN	0.00214422	0.0131301	0.163306	0.035987	1242	307.877	934.123	NA	6	4	2	NA	NA	0.0048675	2.41421:2.41421:1:1:1:1	0.413858(0.488764:0.360674:0.392135)	NA	NA	NA	NA
	Unigene41632_All	Unigene61189_All	YN	0.00661398	0.040507	0.16328	0.000281601	1092	332.405	759.595	NA	18	13	5	NA	NA	0.016931	3.63071:3.63071:1:1:1:1	0.477564(0.464286:0.472527:0.495879)	NA	NA	NA	NA
	Unigene9709_All	Unigene7679_All	YN	0.00690783	0.042351	0.163109	0.000268005	1044	316.558	727.442	NA	18	13	5	NA	NA	0.0176548	5.18408:5.18408:1:1:1:1	0.45225(0.553719:0.360882:0.442149)	NA	NA	NA	NA
	Unigene386_All	Unigene1758_All	YN	0.00258163	0.0158281	0.163104	0.0359824	1032	255.96	776.04	NA	6	4	2	NA	NA	0.00586706	3.85329:3.85329:1:1:1:1	0.443314(0.515988:0.456395:0.357558)	NA	NA	NA	NA
	Unigene2042_All	Unigene7484_All	YN	0.00428205	0.0262777	0.162954	0.00164977	1482	310.965	1171.04	NA	13	8	5	NA	NA	0.00889735	1.45335:1.45335:1:1:1:1	0.438224(0.525097:0.400579:0.388996)	NA	NA	NA	NA
	Unigene19385_All	Unigene38597_All	YN	0.00114704	0.00703965	0.16294	0.14276	1158	285.524	872.476	NA	3	2	1	NA	NA	0.00259996	2.48225:2.48225:1:1:1:1	0.442573(0.553109:0.406736:0.367876)	NA	NA	NA	NA
	Unigene58739_All	Unigene71544_All	YN	0.00215249	0.0132131	0.162907	0.143223	618	152.756	465.244	NA	3	2	1	NA	NA	0.00488642	2:2:1:1:1:1	0.471683(0.48301:0.427184:0.504854)	NA	NA	NA	NA
	Unigene6418_All	Unigene16306_All	YN	0.00407956	0.0251002	0.162531	0.0093399	981	243.605	737.395	NA	9	6	3	NA	NA	0.00929947	1.93711:1.93711:1:1:1:1	0.413682(0.46281:0.376033:0.402204)	NA	NA	NA	NA
	Unigene28492_All	Unigene25363_All	YN	0.00455637	0.0280358	0.16252	0.000520586	1137	255.901	881.099	NA	11	7	4	NA	NA	0.00984081	2:2:1:1:1:1	0.398927(0.491337:0.334158:0.371287)	NA	NA	NA	NA
	Unigene2942_All	Unigene45357_All	YN	0.00166489	0.0102464	0.162485	0.142493	798	196.608	601.392	NA	3	2	1	NA	NA	0.00377918	2:2:1:1:1:1	0.438026(0.48917:0.481949:0.34296)	NA	NA	NA	NA
	Unigene21878_All	Unigene2934_All	YN	0.00148434	0.00916189	0.162012	0.141817	894	219.632	674.368	NA	3	2	1	NA	NA	0.0033705	2:2:1:1:1:1	0.433131(0.486322:0.402736:0.410334)	NA	NA	NA	NA
	Unigene42215_All	Unigene35189_All	YN	0.00771742	0.0476614	0.161922	4.17287e-05	1239	326.981	912.019	NA	22	15	7	NA	NA	0.0182589	3.02715:3.02715:1:1:1:1	0.457845(0.533958:0.459016:0.380562)	NA	NA	NA	NA
	Unigene698_All	Unigene596_All	YN	0.0016808	0.0104183	0.161332	0.141208	789	193.378	595.622	NA	3	2	1	NA	NA	0.00382229	2:2:1:1:1:1	0.453105(0.545627:0.442966:0.370722)	NA	NA	NA	NA
	Unigene25554_All	Unigene37937_All	YN	0.00727273	0.0450883	0.1613	0.00583227	690	137.305	552.695	NA	10	6	4	NA	NA	0.0147977	0.667676:0.667676:1:1:1:1	0.419631(0.509881:0.383399:0.365613)	NA	NA	NA	NA
	Unigene19186_All	Unigene16147_All	YN	0.00197397	0.0122461	0.161191	0.141092	672	164.654	507.346	NA	3	2	1	NA	NA	0.00449086	2:2:1:1:1:1	0.474702(0.53125:0.526786:0.366071)	NA	NA	NA	NA
	Unigene20482_All	Unigene8371_All	YN	0.00378995	0.0235411	0.160993	0.034817	702	172.778	529.222	NA	6	4	2	NA	NA	0.00865117	2:2:1:1:1:1	0.454416(0.634615:0.382479:0.346154)	NA	NA	NA	NA
	Unigene36271_All	Unigene13611_All	YN	0.00319662	0.0198728	0.160854	0.0345728	831	203.959	627.041	NA	6	4	2	NA	NA	0.00728958	1.9552:1.9552:1:1:1:1	0.478941(0.541516:0.415162:0.480144)	NA	NA	NA	NA
	Unigene1382_All	Unigene7664_All	YN	0.00341832	0.0212549	0.160825	0.00167374	1605	431.64	1173.36	NA	13	9	4	NA	NA	0.0082152	9.9506:9.9506:1:1:1:1	0.420959(0.533748:0.402309:0.326821)	NA	NA	NA	NA
	Unigene6568_All	Unigene39752_All	YN	0.00572141	0.0356908	0.160305	0.0063056	729	202.386	526.614	NA	10	7	3	NA	NA	0.0140415	3.87681:3.87681:1:1:1:1	0.433081(0.471591:0.373106:0.454545)	NA	NA	NA	NA
	Unigene24177_All	Unigene2998_All	YN	0.00170969	0.0106897	0.159939	0.139572	774	188.433	585.567	NA	3	2	1	NA	NA	0.0038959	2:2:1:1:1:1	0.437118(0.532967:0.423077:0.355311)	NA	NA	NA	NA
	Unigene5898_All	Unigene885_All	YN	0.0076945	0.0481803	0.159702	0.000129808	1065	280.677	784.323	NA	19	13	6	NA	NA	0.0183644	3.62473:3.62473:1:1:1:1	0.444754(0.610028:0.402507:0.321727)	NA	NA	NA	NA
	Unigene38408_All	Unigene8435_All	YN	0.00118096	0.0074036	0.159512	0.138808	1119	271.474	847.526	NA	3	2	1	NA	NA	0.0026906	2:2:1:1:1:1	0.412869(0.394102:0.420912:0.423592)	NA	NA	NA	NA
	Unigene28086_All	Unigene13248_All	YN	0.00622167	0.03904	0.159367	0.0035366	831	184.878	646.122	NA	11	7	4	NA	NA	0.013523	1.06354:1.06354:1:1:1:1	0.429066(0.461938:0.420415:0.404844)	NA	NA	NA	NA
	Unigene39730_All	Unigene38471_All	YN	0.00124775	0.00783457	0.159262	0.138686	1059	256.799	802.201	NA	3	2	1	NA	NA	0.002845	2:2:1:1:1:1	0.440999(0.53876:0.435401:0.348837)	NA	NA	NA	NA
	Unigene23364_All	Unigene16041_All	YN	0.00194938	0.0122808	0.158734	0.138354	678	164.255	513.745	NA	3	2	1	NA	NA	0.0044523	1.78908:1.78908:1:1:1:1	0.462389(0.50885:0.35177:0.526549)	NA	NA	NA	NA
	Unigene38556_All	Unigene15140_All	YN	0.00345574	0.0217714	0.158728	0.00578386	1197	326.536	870.464	NA	10	7	3	NA	NA	0.00845217	5.35424:5.35424:1:1:1:1	0.414179(0.492537:0.396766:0.353234)	NA	NA	NA	NA
	Unigene4567_All	Unigene29920_All	YN	0.0049239	0.0310387	0.158638	0.00597614	843	231.724	611.276	NA	10	7	3	NA	NA	0.0121023	6.6207:6.6207:1:1:1:1	0.436257(0.477193:0.452632:0.378947)	NA	NA	NA	NA
	Unigene23450_All	Unigene34227_All	YN	0.00394799	0.0249064	0.158513	0.0128831	966	204.104	761.896	NA	8	5	3	NA	NA	0.00837623	0.969076:0.969076:1:1:1:1	0.43323(0.526398:0.321429:0.451863)	NA	NA	NA	NA
	Unigene42539_All	Unigene17589_All	YN	0.00385649	0.0243376	0.158458	0.00853187	1032	251.826	780.174	NA	9	6	3	NA	NA	0.00885424	3.86165:3.86165:1:1:1:1	0.409259(0.498611:0.354167:0.375)	NA	NA	NA	NA
	Unigene2021_All	Unigene20881_All	YN	0.00094128	0.00594411	0.158355	0.137412	1401	337.862	1063.14	NA	3	2	1	NA	NA	0.00214775	2:2:1:1:1:1	0.420414(0.492505:0.38758:0.381156)	NA	NA	NA	NA
	Unigene39557_All	Unigene33224_All	YN	0.00323324	0.0204286	0.15827	0.0334086	819	199.091	619.909	NA	6	4	2	NA	NA	0.00741326	2.31883:2.31883:1:1:1:1	0.418803(0.532967:0.351648:0.371795)	NA	NA	NA	NA
	Unigene31602_All	Unigene51554_All	YN	0.00446896	0.0282626	0.158123	0.0231728	630	181.134	448.866	NA	7	5	2	NA	NA	0.01131	4.15779:4.15779:1:1:1:1	0.457143(0.521429:0.4:0.45)	NA	NA	NA	NA
	Unigene28834_All	Unigene24011_All	YN	0.0018564	0.0117427	0.158089	0.137539	711	171.655	539.345	NA	3	2	1	NA	NA	0.00424323	2:2:1:1:1:1	0.418425(0.443038:0.390295:0.421941)	NA	NA	NA	NA
	Unigene20581_All	Unigene3832_All	YN	0.0044431	0.0281182	0.158015	0.0335411	597	145.53	451.47	NA	6	4	2	NA	NA	0.0102144	2.61404:2.61404:1:1:1:1	0.435897(0.514423:0.4375:0.355769)	NA	NA	NA	NA
	Unigene36331_All	Unigene26332_All	YN	0.00814878	0.0516093	0.157894	0.000853547	717	223.458	493.542	NA	15	11	4	NA	NA	0.0216935	9.20569:9.20569:1:1:1:1	0.449791(0.502092:0.451883:0.395397)	NA	NA	NA	NA
	Unigene25021_All	Unigene12155_All	YN	0.00331694	0.0210083	0.157887	0.0331856	798	193.643	604.357	NA	6	4	2	NA	NA	0.00760992	2:2:1:1:1:1	0.427318(0.546992:0.336466:0.398496)	NA	NA	NA	NA
	Unigene36360_All	Unigene22529_All	YN	0.00420736	0.0266597	0.157818	0.00833356	945	229.701	715.299	NA	9	6	3	NA	NA	0.00966485	1.98363:1.98363:1:1:1:1	0.428349(0.453271:0.454829:0.376947)	NA	NA	NA	NA
	Unigene19462_All	Unigene23395_All	YN	0.00396345	0.0251484	0.157602	0.00403125	1083	324.018	758.982	NA	11	8	3	NA	NA	0.0103017	6.53369:6.53369:1:1:1:1	0.441828(0.530471:0.361496:0.433518)	NA	NA	NA	NA
	Unigene18885_All	Unigene33856_All	YN	0.00411284	0.0261433	0.157319	0.00145332	1326	350.663	975.337	NA	13	9	4	NA	NA	0.00993882	3.36118:3.36118:1:1:1:1	0.438537(0.554299:0.384615:0.376697)	NA	NA	NA	NA
	Unigene19465_All	Unigene16258_All	YN	0.00496097	0.0315499	0.157242	0.00212303	1068	258.937	809.063	NA	12	8	4	NA	NA	0.0114075	2:2:1:1:1:1	0.429775(0.522472:0.370787:0.396067)	NA	NA	NA	NA
	Unigene1884_All	Unigene23326_All	YN	0.00171323	0.0108985	0.157198	0.0324551	1539	370.284	1168.72	NA	6	4	2	NA	NA	0.00392322	2:2:1:1:1:1	0.446755(0.515123:0.435728:0.389414)	NA	NA	NA	NA
	Unigene41567_All	Unigene6969_All	YN	0.00421594	0.0268399	0.157077	0.0225213	666	190.188	475.812	NA	7	5	2	NA	NA	0.0106766	1.86247:1.86247:1:1:1:1	0.54375(0.697917:0.539583:0.39375)	NA	NA	NA	NA
	Unigene28780_All	Unigene311_All	YN	0.00401713	0.0255771	0.157059	0.00565197	1029	279.905	749.095	NA	10	7	3	NA	NA	0.00988181	3.56649:3.56649:1:1:1:1	0.40379(0.460641:0.358601:0.392128)	NA	NA	NA	NA
	Unigene1681_All	Unigene18158_All	YN	0.00312372	0.0198946	0.157014	0.0326852	846	204.359	641.641	NA	6	4	2	NA	NA	0.00717487	2.59327:2.59327:1:1:1:1	0.426123(0.515957:0.432624:0.329787)	NA	NA	NA	NA
	Unigene27660_All	Unigene1806_All	YN	0.00539809	0.0344876	0.156522	0.00100877	1041	297.237	743.763	NA	14	10	4	NA	NA	0.013704	3.34933:3.34933:1:1:1:1	0.520173(0.505764:0.478386:0.576369)	NA	NA	NA	NA
	Unigene19997_All	Unigene26026_All	YN	0.00414522	0.0265116	0.156355	0.0123698	918	192.249	725.751	NA	8	5	3	NA	NA	0.00882923	1.17721:1.17721:1:1:1:1	0.39698(0.477346:0.286408:0.427184)	NA	NA	NA	NA
	Unigene27908_All	Unigene62426_All	YN	0.00340107	0.0217678	0.156243	0.00788893	1164	279.656	884.344	NA	9	6	3	NA	NA	0.00781375	2:2:1:1:1:1	0.407361(0.437965:0.369727:0.414392)	NA	NA	NA	NA
	Unigene36090_All	Unigene16460_All	YN	0.00313381	0.0200846	0.15603	0.000698194	1314	354.698	959.302	NA	10	7	3	NA	NA	0.00770947	4.115:4.115:1:1:1:1	0.414764(0.474886:0.355023:0.414384)	NA	NA	NA	NA
	Unigene15314_All	Unigene16309_All	YN	0.00755914	0.0484717	0.15595	0.000370169	900	234.349	665.651	NA	16	11	5	NA	NA	0.0182123	3.12209:3.12209:1:1:1:1	0.432796(0.477419:0.4:0.420968)	NA	NA	NA	NA
	Unigene11430_All	Unigene24308_All	YN	0.0062664	0.0402368	0.155738	0.000160177	1137	300.789	836.211	NA	17	11.7839	5.21612	NA	NA	0.0152531	5.89107:5.89107:1:1:1:1	0.427109(0.513514:0.391892:0.375921)	NA	NA	NA	NA
	Unigene4366_All	Unigene20376_All	YN	0.00495427	0.0318126	0.155733	0.00794641	801	193.193	607.807	NA	9	6	3	NA	NA	0.0114322	2.22714:2.22714:1:1:1:1	0.439677(0.531716:0.421642:0.365672)	NA	NA	NA	NA
	Unigene40028_All	Unigene38103_All	YN	0.00242476	0.0155818	0.155614	0.0218206	1152	325.79	826.21	NA	7	5	2	NA	NA	0.00614563	1.943:1.943:1:1:1:1	0.504988(0.496259:0.514963:0.503741)	NA	NA	NA	NA
	Unigene3642_All	Unigene11231_All	YN	0.00661792	0.0425693	0.155462	0.00037205	1026	266.862	759.138	NA	16	11	5	NA	NA	0.0159689	2.28917:2.28917:1:1:1:1	0.460039(0.504386:0.426901:0.44883)	NA	NA	NA	NA
	Unigene36323_All	Unigene33712_All	YN	0.00358785	0.0230963	0.155343	0.00353118	735	176.038	558.962	NA	6	4	2	NA	NA	0.00826027	2.47968:2.47968:1:1:1:1	0.427211(0.544898:0.397959:0.338776)	NA	NA	NA	NA
	Unigene41069_All	Unigene29356_All	YN	0.00347379	0.0223913	0.155141	0.0317063	759	181.872	577.128	NA	6	4	2	NA	NA	0.00800681	1.8254:1.8254:1:1:1:1	0.471014(0.511858:0.353755:0.547431)	NA	NA	NA	NA
	Unigene39743_All	Unigene11417_All	YN	0.00490582	0.0316474	0.155015	0.000964735	1143	324.441	818.559	NA	14	10	4	NA	NA	0.0124964	4.50089:4.50089:1:1:1:1	0.433071(0.518373:0.372703:0.408136)	NA	NA	NA	NA
	Unigene10247_All	Unigene1185_All	YN	0.00272384	0.0175903	0.154849	0.00348134	966	230.237	735.763	NA	6	4	2	NA	NA	0.00626712	1.00745:1.00745:1:1:1:1	0.45942(0.495652:0.455072:0.427536)	NA	NA	NA	NA
	Unigene6676_All	Unigene26719_All	YN	0.00379695	0.0245365	0.154747	0.00523892	1083	290.89	792.11	NA	10	7	3	NA	NA	0.00936751	3.16486:3.16486:1:1:1:1	0.409357(0.449875:0.404762:0.373434)	NA	NA	NA	NA
	Unigene24209_All	Unigene4088_All	YN	0.00154609	0.00999762	0.154645	0.133491	849	201.442	647.558	NA	3	2	1	NA	NA	0.00355138	2:2:1:1:1:1	0.429329(0.484099:0.402827:0.40106)	NA	NA	NA	NA
	Unigene4739_All	Unigene201_All	YN	0.00416209	0.0269777	0.154279	0.031059	633	150.954	482.046	NA	6	4	2	NA	NA	0.00960299	2:2:1:1:1:1	0.410798(0.516432:0.352113:0.36385)	NA	NA	NA	NA
	Unigene38882_All	Unigene27021_All	YN	0.00296677	0.019258	0.154054	0.000891199	1878	526.534	1351.47	NA	14	10	4	NA	NA	0.00753434	4.99503:4.99503:1:1:1:1	0.411674(0.498464:0.374808:0.361751)	NA	NA	NA	NA
	Unigene24314_All	Unigene4162_All	YN	0.00165578	0.0107539	0.15397	0.132821	792	187.39	604.61	NA	3	2	1	NA	NA	0.00380843	1.85822:1.85822:1:1:1:1	0.42069(0.503448:0.406897:0.351724)	NA	NA	NA	NA
	Unigene14393_All	Unigene27707_All	YN	0.00158861	0.0103351	0.153711	0.132422	825	194.853	630.147	NA	3	2	1	NA	NA	0.00365439	2:2:1:1:1:1	0.402027(0.420608:0.364865:0.420608)	NA	NA	NA	NA
	Unigene42751_All	Unigene7711_All	YN	0.00110482	0.00719743	0.153503	0.131949	1185	279.212	905.788	NA	3	2	1	NA	NA	0.00254038	2:2:1:1:1:1	0.429958(0.463291:0.413924:0.412658)	NA	NA	NA	NA
	Unigene19441_All	Unigene40259_All	YN	0.00133508	0.00869981	0.153461	0.00476961	981	231.226	749.774	NA	3	2	1	NA	NA	0.00307098	2:2:1:1:1:1	0.417431(0.444954:0.406728:0.400612)	NA	NA	NA	NA
	Unigene36382_All	Unigene31565_All	YN	0.00382169	0.0249207	0.153354	0.00188271	1377	327.561	1049.44	NA	12	8	4	NA	NA	0.00884073	2.15501:2.15501:1:1:1:1	0.414306(0.530501:0.352941:0.359477)	NA	NA	NA	NA
	Unigene6366_All	Unigene49639_All	YN	0.00358376	0.0233772	0.153301	0.020735	777	217.593	559.407	NA	7	5	2	NA	NA	0.00912677	2.35259:2.35259:1:1:1:1	0.505148(0.550193:0.561776:0.403475)	NA	NA	NA	NA
	Unigene5104_All	Unigene492_All	YN	0.00616768	0.0404444	0.152498	0.00022972	1122	307.155	814.845	NA	17	12	5	NA	NA	0.0155512	6.95636:6.95636:1:1:1:1	0.464349(0.568182:0.455882:0.368984)	NA	NA	NA	NA
	Unigene9247_All	Unigene37582_All	YN	0.00250203	0.01643	0.152284	0.0297697	1047	246.134	800.866	NA	6	4	2	NA	NA	0.00577628	2:2:1:1:1:1	0.440952(0.568571:0.412857:0.341429)	NA	NA	NA	NA
	Unigene20293_All	Unigene41464_All	YN	0.00303916	0.0200087	0.151892	0.002726	1674	355.09	1318.91	NA	11	7	4	NA	NA	0.00663875	1.09455:1.09455:1:1:1:1	0.448582(0.464539:0.518617:0.362589)	NA	NA	NA	NA
	Unigene27265_All	Unigene17462_All	YN	0.00151759	0.00999724	0.1518	0.130209	861	201.391	659.609	NA	3	2	1	NA	NA	0.00350101	2:2:1:1:1:1	0.399351(0.482143:0.417208:0.298701)	NA	NA	NA	NA
	Unigene33065_All	Unigene17691_All	YN	0.00435292	0.0286832	0.151759	0.0297651	603	142.138	460.862	NA	6	4	2	NA	NA	0.010088	1.76101:1.76101:1:1:1:1	0.443615(0.50995:0.402985:0.41791)	NA	NA	NA	NA
	Unigene18999_All	Unigene35434_All	YN	0.00179167	0.0118148	0.151647	0.0198737	1545	427.389	1117.61	NA	7	5	2	NA	NA	0.00456432	4.70381:4.70381:1:1:1:1	0.417476(0.464078:0.374757:0.413592)	NA	NA	NA	NA
	Unigene2730_All	Unigene32745_All	YN	0.00313021	0.0206554	0.151544	0.00081132	1773	491.936	1281.06	NA	14	10	4	NA	NA	0.00799275	5.65073:5.65073:1:1:1:1	0.435581(0.480263:0.440789:0.385691)	NA	NA	NA	NA
	Unigene25328_All	Unigene8985_All	YN	0.00274887	0.0181634	0.151341	0.00692085	1428	334.35	1093.65	NA	9	6	3	NA	NA	0.00635802	2:2:1:1:1:1	0.456933(0.537815:0.447479:0.385504)	NA	NA	NA	NA
	Unigene7547_All	Unigene6894_All	YN	0.00632976	0.0418479	0.151256	0.00717584	624	147.991	476.009	NA	9	6	3	NA	NA	0.0147534	2.03874:2.03874:1:1:1:1	0.39823(0.49115:0.318584:0.384956)	NA	NA	NA	NA
	Unigene33955_All	Unigene38680_All	YN	0.00414115	0.0274016	0.151128	0.0294071	633	148.66	484.34	NA	6	4	2	NA	NA	0.00960386	2.01639:2.01639:1:1:1:1	0.392754(0.467391:0.38913:0.321739)	NA	NA	NA	NA
	Unigene19353_All	Unigene33761_All	YN	0.00306124	0.0202579	0.151113	0.0293079	855	200.285	654.715	NA	6	4	2	NA	NA	0.00708957	1.87185:1.87185:1:1:1:1	0.451462(0.601754:0.449123:0.303509)	NA	NA	NA	NA
	Unigene42816_All	Unigene25695_All	YN	0.00122515	0.00810957	0.151075	0.129258	1065	248.014	816.986	NA	3	2	1	NA	NA	0.00282837	2.20531:2.20531:1:1:1:1	0.403756(0.469014:0.323944:0.41831)	NA	NA	NA	NA
	Unigene27973_All	Unigene24483_All	YN	0.00346603	0.0229791	0.150834	2.61498e-05	2655	617.09	2037.91	NA	21	13.9555	7.04448	NA	NA	0.00800135	4.12502:4.12502:1:1:1:1	0.425618(0.501661:0.430233:0.344961)	NA	NA	NA	NA
	Unigene30387_All	Unigene20655_All	YN	0.00435173	0.0289401	0.15037	0.00329088	975	283.616	691.384	NA	11	8	3	NA	NA	0.0115042	13.7971:13.7971:1:1:1:1	0.458462(0.547692:0.410769:0.416923)	NA	NA	NA	NA
	Unigene31903_All	Unigene35036_All	YN	0.00353438	0.0235067	0.150356	0.00110837	1524	389.057	1134.94	NA	13	9	4	NA	NA	0.00863305	4.69678:4.69678:1:1:1:1	0.43668(0.490157:0.424213:0.395669)	NA	NA	NA	NA
	Unigene4054_All	Unigene8252_All	YN	0.00406845	0.0270593	0.150353	0.00686601	966	226.35	739.65	NA	9	6	3	NA	NA	0.00945559	2.3381:2.3381:1:1:1:1	0.400104(0.445652:0.360248:0.39441)	NA	NA	NA	NA
	Unigene580_All	Unigene501_All	YN	0.00377222	0.0250934	0.150327	0.0196744	735	203.474	531.526	NA	7	5	2	NA	NA	0.00967468	7.26015:7.26015:1:1:1:1	0.447832(0.538618:0.414634:0.390244)	NA	NA	NA	NA
	Unigene29753_All	Unigene16431_All	YN	0.00495977	0.0329942	0.150322	0.0011255	1089	279.259	809.741	NA	13	9	4	NA	NA	0.0121488	3.67136:3.67136:1:1:1:1	0.424702(0.487603:0.367769:0.418733)	NA	NA	NA	NA
	Unigene10013_All	Unigene32678_All	YN	0.0034297	0.0228846	0.14987	0.028652	762	177.47	584.53	NA	6	4	2	NA	NA	0.00796076	1.85014:1.85014:1:1:1:1	0.406566(0.549242:0.325758:0.344697)	NA	NA	NA	NA
	Unigene36482_All	Unigene33811_All	YN	0.00141885	0.00947254	0.149786	0.127915	918	212.538	705.462	NA	3	2	1	NA	NA	0.00328347	2:2:1:1:1:1	0.420479(0.413399:0.480392:0.367647)	NA	NA	NA	NA
	Unigene3353_All	Unigene8447_All	YN	0.00105048	0.00701846	0.149674	0.127539	1239	286.298	952.702	NA	3	2	1	NA	NA	0.00242952	2:2:1:1:1:1	0.425747(0.541162:0.355932:0.380145)	NA	NA	NA	NA
	Unigene9506_All	Unigene23150_All	YN	0.00454998	0.0304451	0.149449	0.000141931	1185	303.108	881.892	NA	13	9	4	NA	NA	0.0111736	3.88936:3.88936:1:1:1:1	0.418143(0.477215:0.394937:0.382278)	NA	NA	NA	NA
	Unigene40547_All	Unigene39542_All	YN	0.00295926	0.0198036	0.149431	0.0284272	882	204.821	677.179	NA	6	4	2	NA	NA	0.0068709	1.08198:1.08198:1:1:1:1	0.405063(0.498418:0.324367:0.392405)	NA	NA	NA	NA
	Unigene1163_All	Unigene16065_All	YN	0.00431775	0.0289389	0.149202	0.000800202	909	211.91	697.09	NA	9	6	3	NA	NA	0.0100575	3.282:3.282:1:1:1:1	0.422442(0.50495:0.384488:0.377888)	NA	NA	NA	NA
	Unigene21838_All	Unigene4733_All	YN	0.00583231	0.0391532	0.148961	0.00686115	675	158.62	516.38	NA	9	6	3	NA	NA	0.0136625	3.2719:3.2719:1:1:1:1	0.482963(0.591111:0.495556:0.362222)	NA	NA	NA	NA
	Unigene222_All	Unigene16748_All	YN	0.00719251	0.0482858	0.148957	0.000279496	936	236.651	699.349	NA	16	11	5	NA	NA	0.0175822	4.79695:4.79695:1:1:1:1	0.405473(0.549254:0.352239:0.314925)	NA	NA	NA	NA
	Unigene20973_All	Unigene1969_All	YN	0.00385445	0.0258768	0.148954	0.00659509	1017	236.421	780.579	NA	9	6	3	NA	NA	0.00897397	0.966031:0.966031:1:1:1:1	0.465659(0.480769:0.40522:0.510989)	NA	NA	NA	NA
	Unigene40023_All	Unigene26082_All	YN	0.00887817	0.0597997	0.148465	0.000109164	891	210.655	680.345	NA	18	12	6	NA	NA	0.0209173	6.60898:6.60898:1:1:1:1	0.402688(0.525806:0.369355:0.312903)	NA	NA	NA	NA
	Unigene23281_All	Unigene2535_All	YN	0.0025239	0.0170089	0.148387	0.00427608	1608	417.046	1190.95	NA	10	7	3	NA	NA	0.0062807	4.51303:4.51303:1:1:1:1	0.442893(0.527933:0.418063:0.382682)	NA	NA	NA	NA
	Unigene51575_All	Unigene3556_All	YN	0.0019095	0.0128843	0.148203	0.00634407	2043	469.883	1573.12	NA	9	6	3	NA	NA	0.00443368	1.80498:1.80498:1:1:1:1	0.43884(0.557018:0.387427:0.372076)	NA	NA	NA	NA
	Unigene20792_All	Unigene17122_All	YN	0.00107666	0.00726755	0.148146	0.125824	1206	276.531	929.469	NA	3	2	1	NA	NA	0.00249621	2:2:1:1:1:1	0.422471(0.53607:0.385572:0.345771)	NA	NA	NA	NA
	Unigene38276_All	Unigene31217_All	YN	0.00634677	0.0428657	0.148062	1.81587e-06	1728	455.583	1272.42	NA	27	18.9617	8.03832	NA	NA	0.0159749	4.06857:4.06857:1:1:1:1	0.427586(0.50431:0.431034:0.347414)	NA	NA	NA	NA
	Unigene35385_All	Unigene14878_All	YN	0.00196178	0.0132758	0.147771	0.126198	663	152.381	510.619	NA	3	2	1	NA	NA	0.00456212	2:2:1:1:1:1	0.520179(0.571749:0.399103:0.589686)	NA	NA	NA	NA
	Unigene38452_All	Unigene26630_All	YN	0.00465475	0.0315002	0.147769	0.000510938	1212	319.967	892.033	NA	14	9.86115	4.13885	NA	NA	0.0117419	3.14853:3.14853:1:1:1:1	0.470854(0.491379:0.3867:0.534483)	NA	NA	NA	NA
	Unigene1444_All	Unigene26995_All	YN	0.00174622	0.0118177	0.147764	0.027337	1488	341.15	1146.85	NA	6	4	2	NA	NA	0.00405528	2:2:1:1:1:1	0.417003(0.474798:0.375:0.40121)	NA	NA	NA	NA
	Unigene18802_All	Unigene7697_All	YN	0.00581057	0.0393316	0.147733	7.91553e-06	1656	446.32	1209.68	NA	24	17	7	NA	NA	0.0148451	4.25386:4.25386:1:1:1:1	0.469013(0.543321:0.477437:0.386282)	NA	NA	NA	NA
	Unigene5484_All	Unigene22605_All	YN	0.00179664	0.0121694	0.147635	0.125649	723	165.738	557.262	NA	3	2	1	NA	NA	0.00417446	2.5986:2.5986:1:1:1:1	0.441217(0.560166:0.421162:0.342324)	NA	NA	NA	NA
	Unigene8320_All	Unigene3959_All	YN	0.0048725	0.0330196	0.147564	0.00162531	930	312.036	617.964	NA	13	10	3	NA	NA	0.0143165	10.9008:10.9008:1:1:1:1	0.443011(0.524194:0.333871:0.470968)	NA	NA	NA	NA
	Unigene18236_All	Unigene38031_All	YN	0.00143272	0.00971233	0.147516	0.125254	906	207.26	698.74	NA	3	2	1	NA	NA	0.0033268	2:2:1:1:1:1	0.418322(0.523179:0.380795:0.350993)	NA	NA	NA	NA
	Unigene39253_All	Unigene21055_All	YN	0.00232351	0.0157612	0.14742	0.00991215	1614	320.581	1293.42	NA	8	5	3	NA	NA	0.00499256	2:2:1:1:1:1	0.433568(0.520282:0.37037:0.410053)	NA	NA	NA	NA
	Unigene40791_All	Unigene7549_All	YN	0.00199535	0.0135369	0.147401	0.125393	651	149.082	501.918	NA	3	2	1	NA	NA	0.00463841	2:2:1:1:1:1	0.417819(0.463134:0.364055:0.426267)	NA	NA	NA	NA
	Unigene8834_All	Unigene38477_All	YN	0.00302367	0.0205484	0.147149	0.0129491	960	297.174	662.826	NA	8	6	2	NA	NA	0.00844855	6.7051:6.7051:1:1:1:1	0.447396(0.510938:0.407813:0.423438)	NA	NA	NA	NA
	Unigene24621_All	Unigene38459_All	YN	0.00175542	0.0119346	0.147087	0.0179053	1563	422.293	1140.71	NA	7	5	2	NA	NA	0.00450564	2.06905:2.06905:1:1:1:1	0.463852(0.53071:0.483685:0.377159)	NA	NA	NA	NA
	Unigene27907_All	Unigene32419_All	YN	0.00180233	0.0122633	0.14697	0.12491	720	164.497	555.503	NA	3	2	1	NA	NA	0.00419234	2.11252:2.11252:1:1:1:1	0.418056(0.491667:0.29375:0.46875)	NA	NA	NA	NA
	Unigene40669_All	Unigene17824_All	YN	0.0040561	0.0276091	0.146912	0.00619563	963	221.344	741.656	NA	9	6	3	NA	NA	0.00946972	1.86828:1.86828:1:1:1:1	0.461059(0.53271:0.38785:0.462617)	NA	NA	NA	NA
	Unigene1475_All	Unigene8366_All	YN	0.00418549	0.0285731	0.146484	0.0061524	933	214.218	718.782	NA	9	6	3	NA	NA	0.00978491	1.76875:1.76875:1:1:1:1	0.437436(0.478462:0.416923:0.416923)	NA	NA	NA	NA
	Unigene2492_All	Unigene35208_All	YN	0.00350106	0.0239817	0.145989	0.0126559	828	255.41	572.59	NA	8	6	2	NA	NA	0.00981864	11.0874:11.0874:1:1:1:1	0.403567(0.493311:0.317726:0.399666)	NA	NA	NA	NA
	Unigene18680_All	Unigene30405_All	YN	0.00242283	0.016604	0.145918	0.0266991	1071	244.186	826.814	NA	6	4	2	NA	NA	0.00565612	2.37471:2.37471:1:1:1:1	0.414566(0.497199:0.379552:0.366947)	NA	NA	NA	NA
	Unigene21707_All	Unigene30385_All	YN	0.00347568	0.0238323	0.145839	0.000641318	1581	427.373	1153.63	NA	14	10	4	NA	NA	0.00897845	3.72862:3.72862:1:1:1:1	0.446563(0.499133:0.400347:0.440208)	NA	NA	NA	NA
	Unigene19828_All	Unigene16807_All	YN	0.00442373	0.030342	0.145795	0.00282878	951	270.837	680.163	NA	11	8	3	NA	NA	0.011805	8.95313:8.95313:1:1:1:1	0.435857(0.550473:0.375394:0.381703)	NA	NA	NA	NA
	Unigene680_All	Unigene39786_All	YN	0.00278963	0.0191396	0.145752	0.0264781	930	211.669	718.331	NA	6	4	2	NA	NA	0.0065109	1.84028:1.84028:1:1:1:1	0.451075(0.620968:0.412903:0.319355)	NA	NA	NA	NA
	Unigene38375_All	Unigene19016_All	YN	0.00353979	0.0243046	0.145643	0.00602119	1101	251.485	849.515	NA	9	6	3	NA	NA	0.00828278	1.85348:1.85348:1:1:1:1	0.425676(0.494595:0.37027:0.412162)	NA	NA	NA	NA
	Unigene41355_All	Unigene38136_All	YN	0.00134738	0.00927516	0.145268	0.122673	960	217.01	742.99	NA	3	2	1	NA	NA	0.00313947	2.60701:2.60701:1:1:1:1	0.384896(0.459375:0.348438:0.346875)	NA	NA	NA	NA
	Unigene28738_All	Unigene29160_All	YN	0.0051007	0.0351787	0.144994	0.00395901	795	204.58	590.42	NA	10	7	3	NA	NA	0.0128408	3.51591:3.51591:1:1:1:1	0.440881(0.486792:0.449057:0.386792)	NA	NA	NA	NA
	Unigene32458_All	Unigene32185_All	YN	0.00356279	0.0245789	0.144953	0.000515023	1779	372.2	1406.8	NA	14	9	5	NA	NA	0.00795976	0.653643:0.653643:1:1:1:1	0.456436(0.554806:0.428331:0.386172)	NA	NA	NA	NA
	Unigene3568_All	Unigene3184_All	YN	0.00326513	0.0225652	0.144698	0.0122154	885	271.088	613.912	NA	8	6	2	NA	NA	0.00917701	6.37269:6.37269:1:1:1:1	0.458472(0.491694:0.42691:0.456811)	NA	NA	NA	NA
	Unigene34838_All	Unigene2611_All	YN	0.00498064	0.0344988	0.144372	0.00944098	753	148.642	604.358	NA	8	5	3	NA	NA	0.0108075	0.962239:0.962239:1:1:1:1	0.423639(0.537849:0.358566:0.374502)	NA	NA	NA	NA
	Unigene17525_All	Unigene3239_All	YN	0.00130397	0.00904912	0.144099	0.121295	990	222.352	767.648	NA	3	2	1	NA	NA	0.00304351	2:2:1:1:1:1	0.437374(0.454545:0.424242:0.433333)	NA	NA	NA	NA
	Unigene1916_All	Unigene12022_All	YN	0.0040791	0.0283123	0.144075	0.000587966	1344	360.168	983.832	NA	14	10	4	NA	NA	0.0105732	4.99656:4.99656:1:1:1:1	0.433481(0.443459:0.409091:0.447894)	NA	NA	NA	NA
	Unigene38869_All	Unigene7154_All	YN	0.00842164	0.0584819	0.144004	2.05773e-05	1086	250.055	835.945	NA	21	14	7	NA	NA	0.0199482	1.91173:1.91173:1:1:1:1	0.440312(0.523416:0.421488:0.376033)	NA	NA	NA	NA
	Unigene9272_All	Unigene69102_All	YN	0.00122251	0.00849284	0.143946	0.0117247	2349	711.645	1637.35	NA	8	6	2	NA	NA	0.00342511	9.15541:9.15541:1:1:1:1	0.396705(0.488953:0.338372:0.362791)	NA	NA	NA	NA
	Unigene629_All	Unigene5233_All	YN	0.0024357	0.0169311	0.143859	0.0256894	1062	239.547	822.453	NA	6	4	2	NA	NA	0.00570533	2:2:1:1:1:1	0.416214(0.475543:0.399457:0.373641)	NA	NA	NA	NA
	Unigene26247_All	Unigene2722_All	YN	0.00396991	0.0276085	0.143793	0.00376199	1017	259.054	757.946	NA	10	7	3	NA	NA	0.00999121	3.73652:3.73652:1:1:1:1	0.405605(0.441003:0.39233:0.383481)	NA	NA	NA	NA
	Unigene41535_All	Unigene33436_All	YN	0.00265618	0.0184857	0.143689	0.00182807	1029	274.705	754.295	NA	7	5	2	NA	NA	0.00688207	5.0674:5.0674:1:1:1:1	0.445092(0.533528:0.390671:0.411079)	NA	NA	NA	NA
	Unigene41871_All	Unigene31435_All	YN	0.00291076	0.0203051	0.143352	0.00367853	1383	350.34	1032.66	NA	10	7	3	NA	NA	0.00731707	2.27149:2.27149:1:1:1:1	0.433839(0.458785:0.420824:0.421909)	NA	NA	NA	NA
	Unigene19733_All	Unigene18187_All	YN	0.00556355	0.0388807	0.143093	0.00102482	954	208.983	745.017	NA	12	7.87059	4.12941	NA	NA	0.012862	1.33624:1.33624:1:1:1:1	0.444776(0.51791:0.410448:0.40597)	NA	NA	NA	NA
	Unigene14125_All	Unigene18906_All	YN	0.0091489	0.0640331	0.142878	1.88062e-05	1092	212.174	879.826	NA	21	13	8	NA	NA	0.0198128	1.04368:1.04368:1:1:1:1	0.428114(0.519231:0.40522:0.35989)	NA	NA	NA	NA
	Unigene19258_All	Unigene24538_All	YN	0.002101	0.0147417	0.14252	0.00357234	1911	481.099	1429.9	NA	10	7	3	NA	NA	0.00528333	2.35052:2.35052:1:1:1:1	0.438776(0.50314:0.396389:0.416797)	NA	NA	NA	NA
	Unigene15880_All	Unigene16450_All	YN	0.00440316	0.0309317	0.142351	0.000157844	1377	465.893	911.107	NA	18	14	4	NA	NA	0.0133788	18.4537:18.4537:1:1:1:1	0.470588(0.537037:0.358388:0.51634)	NA	NA	NA	NA
	Unigene592_All	Unigene16369_All	YN	0.00252665	0.0177611	0.142257	0.00243288	1647	457.652	1189.35	NA	11	8	3	NA	NA	0.00675985	3.32922:3.32922:1:1:1:1	0.436248(0.454463:0.423497:0.430783)	NA	NA	NA	NA
	Unigene5757_All	Unigene5259_All	YN	0.0056475	0.0397645	0.142024	0.00339634	867	155.505	711.495	NA	10	6	4	NA	NA	0.0117667	1.13995:1.13995:1:1:1:1	0.440023(0.487889:0.444637:0.387543)	NA	NA	NA	NA
	Unigene36353_All	Unigene8465_All	YN	0.00763665	0.0538398	0.14184	1.93513e-05	1200	223.25	976.75	NA	19	11.5797	7.42034	NA	NA	0.0162324	0.791943:0.791943:1:1:1:1	0.443069(0.52599:0.371287:0.431931)	NA	NA	NA	NA
	Unigene42473_All	Unigene22921_All	YN	0.00352658	0.0248889	0.141693	0.000186189	1872	450.818	1421.18	NA	16	11	5	NA	NA	0.0086711	1.60951:1.60951:1:1:1:1	0.441456(0.497627:0.424051:0.40269)	NA	NA	NA	NA
	Unigene22746_All	Unigene20642_All	YN	0.00327116	0.0231224	0.141472	0.0151353	1095	175.858	919.142	NA	7	4	3	NA	NA	0.00645929	0.960226:0.960226:1:1:1:1	0.419178(0.482192:0.409589:0.365753)	NA	NA	NA	NA
	Unigene26883_All	Unigene24852_All	YN	0.003755	0.0266029	0.14115	0.0243745	687	153.042	533.958	NA	6	4	2	NA	NA	0.00884479	2:2:1:1:1:1	0.435226(0.478166:0.491266:0.336245)	NA	NA	NA	NA
	Unigene29668_All	Unigene30560_All	YN	0.00430239	0.0305066	0.141031	4.32798e-05	1836	436.905	1399.09	NA	19	13	6	NA	NA	0.0105381	8.07246:8.07246:1:1:1:1	0.418699(0.517073:0.425203:0.313821)	NA	NA	NA	NA
	Unigene395_All	Unigene19048_All	YN	0.00206121	0.0146221	0.140966	0.118183	624	138.182	485.818	NA	3	2	1	NA	NA	0.00484276	2:2:1:1:1:1	0.390135(0.419283:0.410314:0.340807)	NA	NA	NA	NA
	Unigene29055_All	Unigene21328_All	YN	0.00265037	0.0188047	0.140942	0.0243127	972	215.985	756.015	NA	6	4	2	NA	NA	0.00623997	1.83843:1.83843:1:1:1:1	0.436728(0.540123:0.387346:0.382716)	NA	NA	NA	NA
	Unigene40834_All	Unigene79357_All	YN	0.00388043	0.0275405	0.140899	0.0158689	702	185.259	516.741	NA	7	5	2	NA	NA	0.0101244	4.70383:4.70383:1:1:1:1	0.43(0.512:0.402:0.376)	NA	NA	NA	NA
	Unigene8862_All	Unigene40476_All	YN	0.00315896	0.0224219	0.140887	0.0113711	900	220.251	679.749	NA	7	4.85735	2.14265	NA	NA	0.00787305	2.35984:2.35984:1:1:1:1	0.434444(0.54:0.376667:0.386667)	NA	NA	NA	NA
	Unigene21445_All	Unigene15147_All	YN	0.00103	0.00731094	0.140885	0.0239129	2493	549.928	1943.07	NA	6	4	2	NA	NA	0.00241551	2:2:1:1:1:1	0.392749(0.481777:0.379271:0.317198)	NA	NA	NA	NA
	Unigene27394_All	Unigene25871_All	YN	0.00264829	0.0188124	0.140774	0.0156623	1026	269.412	756.588	NA	7	5	2	NA	NA	0.00689273	2:2:1:1:1:1	0.485867(0.54386:0.432749:0.480994)	NA	NA	NA	NA
	Unigene49878_All	Unigene17370_All	YN	0.0100873	0.0717409	0.140607	0.000208351	831	131.729	699.271	NA	16	9	7	NA	NA	0.0198605	0.370676:0.370676:1:1:1:1	0.473621(0.473022:0.422662:0.52518)	NA	NA	NA	NA
	Unigene21208_All	Unigene42962_All	YN	0.0035249	0.0251006	0.140431	0.00846481	1056	202.911	853.089	NA	8	5	3	NA	NA	0.00767069	1.2482:1.2482:1:1:1:1	0.404379(0.489276:0.369973:0.353887)	NA	NA	NA	NA
	Unigene2321_All	Unigene14576_All	YN	0.00427086	0.0304207	0.140393	0.00233132	975	270.172	704.828	NA	11	8	3	NA	NA	0.011517	11.3645:11.3645:1:1:1:1	0.448718(0.558462:0.421538:0.366154)	NA	NA	NA	NA
	Unigene6811_All	Unigene40082_All	YN	0.00413182	0.0294523	0.140288	0.000265072	1560	346.513	1213.49	NA	15	10	5	NA	NA	0.0097561	1.81305:1.81305:1:1:1:1	0.414267(0.487524:0.371401:0.383877)	NA	NA	NA	NA
	Unigene19300_All	Unigene4708_All	YN	0.00291002	0.0207976	0.139921	0.00182576	1719	341.736	1377.26	NA	11	7	4	NA	NA	0.00646606	0.966785:0.966785:1:1:1:1	0.441827(0.541012:0.417976:0.366492)	NA	NA	NA	NA
	Unigene42693_All	Unigene15731_All	YN	0.0037896	0.0271353	0.139656	0.0153259	717	187.73	529.27	NA	7	5	2	NA	NA	0.00990215	4.32447:4.32447:1:1:1:1	0.447699(0.546025:0.456067:0.341004)	NA	NA	NA	NA
	Unigene25341_All	Unigene19056_All	YN	0.00267815	0.0192804	0.138906	0.00316631	1491	368.565	1122.44	NA	10	7	3	NA	NA	0.00678211	3.48245:3.48245:1:1:1:1	0.413146(0.512072:0.348089:0.379276)	NA	NA	NA	NA
	Unigene10443_All	Unigene33774_All	YN	0.00227347	0.0163907	0.138704	0.0230841	1128	246.908	881.092	NA	6	4	2	NA	NA	0.00536359	2.09013:2.09013:1:1:1:1	0.403277(0.509592:0.376499:0.323741)	NA	NA	NA	NA
	Unigene67018_All	Unigene22399_All	YN	0.00665351	0.0480068	0.138595	0.00112122	777	172.788	604.212	NA	12	8	4	NA	NA	0.0158496	2.56234:2.56234:1:1:1:1	0.393179(0.403475:0.428571:0.34749)	NA	NA	NA	NA
	Unigene26272_All	Unigene24238_All	YN	0.00194101	0.0140057	0.138587	0.115334	660	144.137	515.863	NA	3	2	1	NA	NA	0.0045758	2:2:1:1:1:1	0.389368(0.454741:0.323276:0.390086)	NA	NA	NA	NA
	Unigene17874_All	Unigene38229_All	YN	0.00339873	0.0245453	0.138467	7.18632e-05	2016	541.491	1474.51	NA	18	13	5	NA	NA	0.00907864	2.9934:2.9934:1:1:1:1	0.467806(0.584695:0.456909:0.361813)	NA	NA	NA	NA
	Unigene34170_All	Unigene33009_All	YN	0.00209967	0.0151695	0.138414	0.00067752	2508	600.204	1907.8	NA	13	9	4	NA	NA	0.00522749	2.92308:2.92308:1:1:1:1	0.437799(0.55622:0.42823:0.328947)	NA	NA	NA	NA
	Unigene9972_All	Unigene3544_All	YN	0.00256795	0.0185568	0.138383	0.0231047	999	218.835	780.165	NA	6	4	2	NA	NA	0.00607037	2:2:1:1:1:1	0.410911(0.462462:0.411411:0.358859)	NA	NA	NA	NA
	Unigene19485_All	Unigene30407_All	YN	0.000737196	0.00532767	0.138371	0.114489	1734	376.734	1357.27	NA	3	2	1	NA	NA	0.00173453	2:2:1:1:1:1	0.429598(0.514655:0.350862:0.423276)	NA	NA	NA	NA
	Unigene36535_All	Unigene40480_All	YN	0.00293156	0.0211873	0.138364	0.00491359	1314	288.641	1025.36	NA	9	6	3	NA	NA	0.00694171	2.11838:2.11838:1:1:1:1	0.414003(0.561644:0.350457:0.329909)	NA	NA	NA	NA
	Unigene1351_All	Unigene35202_All	YN	0.00774659	0.056034	0.138248	1.79839e-08	1986	428.86	1557.14	NA	35	23	12	NA	NA	0.0181739	1.72583:1.72583:1:1:1:1	0.402879(0.483895:0.383602:0.341142)	NA	NA	NA	NA
	Unigene34739_All	Unigene25129_All	YN	0.00325908	0.023616	0.138003	0.000453673	1662	431.891	1230.11	NA	14	10	4	NA	NA	0.00854908	3.56823:3.56823:1:1:1:1	0.477976(0.582143:0.491964:0.359821)	NA	NA	NA	NA
	Unigene20097_All	Unigene17057_All	YN	0.00335883	0.0243564	0.137903	0.00789938	1104	208.831	895.169	NA	8	5	3	NA	NA	0.00733071	0.615094:0.615094:1:1:1:1	0.40308(0.475543:0.387228:0.346467)	NA	NA	NA	NA
	Unigene37057_All	Unigene38267_All	YN	0.00449509	0.0326106	0.137841	0.00485053	858	188.589	669.411	NA	9	6	3	NA	NA	0.0106749	2.03909:2.03909:1:1:1:1	0.440972(0.484375:0.409722:0.428819)	NA	NA	NA	NA
	Unigene80660_All	Unigene33402_All	YN	0.00357078	0.0259342	0.137686	0.0102164	798	236.563	561.437	NA	8	6	2	NA	NA	0.0102003	3.99196:3.99196:1:1:1:1	0.444251(0.56446:0.343206:0.425087)	NA	NA	NA	NA
	Unigene42807_All	Unigene63517_All	YN	0.00886216	0.0643962	0.137619	1.02616e-06	1221	312.861	908.139	NA	27	19	8	NA	NA	0.0230918	3.0693:3.0693:1:1:1:1	0.42629(0.461916:0.385749:0.431204)	NA	NA	NA	NA
	Unigene3002_All	Unigene16007_All	YN	0.00539057	0.0391753	0.137601	0.000318703	1035	290.293	744.707	NA	15	11	4	NA	NA	0.0148664	5.32816:5.32816:1:1:1:1	0.416425(0.437681:0.42029:0.391304)	NA	NA	NA	NA
	Unigene38848_All	Unigene33592_All	YN	0.00312873	0.0227389	0.137594	0.0145122	864	223.238	640.762	NA	7	5	2	NA	NA	0.00819554	2:2:1:1:1:1	0.462384(0.567708:0.420139:0.399306)	NA	NA	NA	NA
	Unigene27268_All	Unigene29511_All	YN	0.00166945	0.0121344	0.13758	0.0738199	849	249.237	599.763	NA	4	3	1	NA	NA	0.00474159	2:2:1:1:1:1	0.518846(0.491166:0.590106:0.475265)	NA	NA	NA	NA
	Unigene6824_All	Unigene23377_All	YN	0.00267049	0.0194286	0.137452	0.00166896	1866	365.482	1500.52	NA	11	7	4	NA	NA	0.0059528	0.873006:0.873006:1:1:1:1	0.437835(0.569936:0.372186:0.371383)	NA	NA	NA	NA
	Unigene6430_All	Unigene26894_All	YN	0.00702133	0.0511495	0.137271	0.000104388	960	244.523	715.477	NA	17	12	5	NA	NA	0.0182613	2.32558:2.32558:1:1:1:1	0.411275(0.442647:0.411765:0.379412)	NA	NA	NA	NA
	Unigene10242_All	Unigene71383_All	YN	0.00218741	0.0159507	0.137136	0.0736336	648	190.171	457.829	NA	4	3	1	NA	NA	0.00622659	2.0394:2.0394:1:1:1:1	0.508488(0.537037:0.511574:0.476852)	NA	NA	NA	NA
	Unigene16807_All	Unigene90449_All	YN	0.00172206	0.0126407	0.136232	0.112615	741	159.632	581.368	NA	3	2	1	NA	NA	0.00407423	2:2:1:1:1:1	0.399089(0.523438:0.355469:0.318359)	NA	NA	NA	NA
	Unigene29735_All	Unigene15215_All	YN	0.00444532	0.0326549	0.13613	0.00505482	1059	156.474	902.526	NA	9	5	4	NA	NA	0.00861347	0.617303:0.617303:1:1:1:1	0.402597(0.515584:0.385714:0.306494)	NA	NA	NA	NA
	Unigene13243_All	Unigene38110_All	YN	0.00349875	0.0257098	0.136086	0.0222743	732	158.983	573.017	NA	6	4	2	NA	NA	0.00832277	2.06601:2.06601:1:1:1:1	0.41834(0.483936:0.459839:0.311245)	NA	NA	NA	NA
	Unigene42566_All	Unigene17998_All	YN	0.00386136	0.0283848	0.136036	0.00159126	1290	251.374	1038.63	NA	11	7	4	NA	NA	0.00864008	0.878913:0.878913:1:1:1:1	0.474419(0.506977:0.345349:0.57093)	NA	NA	NA	NA
	Unigene28229_All	Unigene33197_All	YN	0.00886491	0.0652371	0.135888	0.000405477	714	146.597	567.403	NA	14	9	5	NA	NA	0.0204392	1.32659:1.32659:1:1:1:1	0.410739(0.479079:0.368201:0.384937)	NA	NA	NA	NA
	Unigene6329_All	Unigene37319_All	YN	0.00406533	0.0299372	0.135795	0.000408455	1329	341.875	987.125	NA	14	10	4	NA	NA	0.0107207	5.67186:5.67186:1:1:1:1	0.42722(0.485808:0.430131:0.365721)	NA	NA	NA	NA
	Unigene20888_All	Unigene13539_All	YN	0.00258379	0.0190413	0.135694	0.000610229	2031	480.217	1550.78	NA	13	9	4	NA	NA	0.00647506	10.1726:10.1726:1:1:1:1	0.434822(0.538566:0.512855:0.253045)	NA	NA	NA	NA
	Unigene41784_All	Unigene32574_All	YN	0.00502288	0.037035	0.135625	0.00297188	795	195.43	599.57	NA	10	7	3	NA	NA	0.0128922	2:2:1:1:1:1	0.420074(0.511152:0.405204:0.343866)	NA	NA	NA	NA
	Unigene19504_All	Unigene7265_All	YN	0.00533654	0.0393701	0.135548	8.67413e-05	1254	312.87	941.13	NA	17	12	5	NA	NA	0.0138278	2:2:1:1:1:1	0.425439(0.549043:0.357656:0.369617)	NA	NA	NA	NA
	Unigene70850_All	Unigene24872_All	YN	0.00136512	0.0100809	0.135416	0.111487	933	199.795	733.205	NA	3	2	1	NA	NA	0.00323155	2.09012:2.09012:1:1:1:1	0.419118(0.482353:0.366176:0.408824)	NA	NA	NA	NA
	Unigene41127_All	Unigene20625_All	YN	0.0045283	0.033454	0.135359	0.0095685	627	183.942	443.058	NA	8	6	2	NA	NA	0.0130142	1.7993:1.7993:1:1:1:1	0.473684(0.480861:0.456938:0.483254)	NA	NA	NA	NA
	Unigene18974_All	Unigene30258_All	YN	0.00493251	0.0364862	0.135189	0.0133634	723	112.53	610.47	NA	7	4	3	NA	NA	0.00984362	0.313113:0.313113:1:1:1:1	0.472337(0.553942:0.425311:0.437759)	NA	NA	NA	NA
	Unigene23002_All	Unigene17043_All	YN	0.00249732	0.0184806	0.135132	0.0137745	1077	274.757	802.243	NA	7	5	2	NA	NA	0.00657487	2.35906:2.35906:1:1:1:1	0.441204(0.475:0.404167:0.444444)	NA	NA	NA	NA
	Unigene6479_All	Unigene21750_All	YN	0.00383905	0.0284377	0.134999	0.0215074	666	143.342	522.658	NA	6	4	2	NA	NA	0.00913337	2:2:1:1:1:1	0.422673(0.538288:0.288288:0.441441)	NA	NA	NA	NA
	Unigene33168_All	Unigene26205_All	YN	0.00205369	0.015218	0.134951	0.0136524	1308	332.761	975.239	NA	7	5	2	NA	NA	0.00540275	2.76377:2.76377:1:1:1:1	0.451453(0.487385:0.408257:0.458716)	NA	NA	NA	NA
	Unigene43408_All	Unigene47794_All	YN	0.0048011	0.0356232	0.134775	0.00133118	888	260.88	627.12	NA	12	9	3	NA	NA	0.0138561	19.1912:19.1912:1:1:1:1	0.398119(0.525078:0.332288:0.336991)	NA	NA	NA	NA
	Unigene52794_All	Unigene2912_All	YN	0.00437074	0.032465	0.134629	0.0215072	585	126.026	458.974	NA	6	4	2	NA	NA	0.0104231	1.21544:1.21544:1:1:1:1	0.466667(0.574359:0.407692:0.417949)	NA	NA	NA	NA
	Unigene1011_All	Unigene19496_All	YN	0.00370923	0.0275668	0.134554	0.000915504	1377	295.908	1081.09	NA	12	8	4	NA	NA	0.00883606	1.455:1.455:1:1:1:1	0.414753(0.509395:0.38309:0.351775)	NA	NA	NA	NA
	Unigene41801_All	Unigene27056_All	YN	0.00486995	0.0361983	0.134535	8.46072e-05	1371	340.935	1030.06	NA	17	12	5	NA	NA	0.0126606	2.25346:2.25346:1:1:1:1	0.448942(0.530635:0.496718:0.319475)	NA	NA	NA	NA
	Unigene34523_All	Unigene10131_All	YN	0.00514054	0.0382376	0.134437	0.00264856	942	161.202	780.798	NA	10	6	4	NA	NA	0.0108044	0.72843:0.72843:1:1:1:1	0.396825(0.509524:0.307937:0.373016)	NA	NA	NA	NA
	Unigene5806_All	Unigene33681_All	YN	0.00201085	0.0149699	0.134327	0.110481	633	134.94	498.06	NA	3	2	1	NA	NA	0.00477338	2:2:1:1:1:1	0.402844(0.478673:0.350711:0.379147)	NA	NA	NA	NA
	Unigene42673_All	Unigene38451_All	YN	0.0031747	0.0236951	0.133982	0.00125245	1335	388.029	946.971	NA	12	9	3	NA	NA	0.00913912	15.607:15.607:1:1:1:1	0.401087(0.440217:0.409783:0.353261)	NA	NA	NA	NA
	Unigene35680_All	Unigene16326_All	YN	0.00677863	0.0506665	0.133789	0.000577898	777	184.092	592.908	NA	13	9	4	NA	NA	0.0171768	1.99268:1.99268:1:1:1:1	0.47426(0.471042:0.351351:0.600386)	NA	NA	NA	NA
	Unigene19077_All	Unigene20517_All	YN	0.00432083	0.0323143	0.133713	0.0210849	591	126.615	464.385	NA	6	4	2	NA	NA	0.0103181	1.18472:1.18472:1:1:1:1	0.435535(0.511792:0.459906:0.334906)	NA	NA	NA	NA
	Unigene39087_All	Unigene3041_All	YN	0.00152622	0.0114152	0.1337	0.0701064	921	265.121	655.879	NA	4	3	1	NA	NA	0.0043729	4.70215:4.70215:1:1:1:1	0.43051(0.550489:0.312704:0.428339)	NA	NA	NA	NA
	Unigene19881_All	Unigene957_All	YN	0.00224828	0.0168477	0.133447	0.0206718	1131	240.097	890.903	NA	6	4	2	NA	NA	0.00534756	2:2:1:1:1:1	0.408312(0.491003:0.374036:0.359897)	NA	NA	NA	NA
	Unigene27128_All	Unigene23446_All	YN	0.00535324	0.0402654	0.132949	0.00699069	690	127.539	562.461	NA	8	5	3	NA	NA	0.0118064	0.816163:0.816163:1:1:1:1	0.460784(0.513725:0.343137:0.52549)	NA	NA	NA	NA
	Unigene19313_All	Unigene40481_All	YN	0.00410727	0.0310802	0.13215	0.00252828	963	230.326	732.674	NA	10	7	3	NA	NA	0.0105586	1.77374:1.77374:1:1:1:1	0.436937(0.509009:0.361862:0.43994)	NA	NA	NA	NA
	Unigene42836_All	Unigene35360_All	YN	0.00624674	0.0473649	0.131886	7.74345e-05	1068	264.195	803.805	NA	17	12	5	NA	NA	0.0164183	3.70356:3.70356:1:1:1:1	0.454955(0.513514:0.501351:0.35)	NA	NA	NA	NA
	Unigene7652_All	Unigene24558_All	YN	0.00361156	0.0274368	0.131632	0.0126506	741	185.889	555.111	NA	7	5	2	NA	NA	0.00958842	4.00682:4.00682:1:1:1:1	0.443995(0.526316:0.421053:0.384615)	NA	NA	NA	NA
	Unigene36193_All	Unigene40444_All	YN	0.00202101	0.0153706	0.131485	0.0680905	693	197.444	495.556	NA	4	3	1	NA	NA	0.00582448	5.09716:5.09716:1:1:1:1	0.417749(0.497835:0.378788:0.376623)	NA	NA	NA	NA
	Unigene23374_All	Unigene8788_All	YN	0.00195296	0.0148577	0.131445	0.0680357	717	204.202	512.798	NA	4	3	1	NA	NA	0.00562822	1.78085:1.78085:1:1:1:1	0.498605(0.520921:0.464435:0.51046)	NA	NA	NA	NA
	Unigene42863_All	Unigene3328_All	YN	0.00116753	0.00889738	0.131222	0.00122674	2280	565.644	1714.36	NA	7	5	2	NA	NA	0.00308522	1.08322:1.08322:1:1:1:1	0.468025(0.510512:0.482917:0.410644)	NA	NA	NA	NA
	Unigene24167_All	Unigene8611_All	YN	0.00158013	0.0120422	0.131216	0.106809	801	167.475	633.525	NA	3	2	1	NA	NA	0.00376757	2:2:1:1:1:1	0.405119(0.529963:0.310861:0.374532)	NA	NA	NA	NA
	Unigene7459_All	Unigene37229_All	YN	0.00418199	0.0318891	0.131142	0.000499229	1248	288.807	959.193	NA	13	9	4	NA	NA	0.0105939	2.01826:2.01826:1:1:1:1	0.447242(0.478417:0.502398:0.360911)	NA	NA	NA	NA
	Unigene38584_All	Unigene21128_All	YN	0.00806853	0.0615307	0.13113	0.00142794	618	119.448	498.552	NA	11	7	4	NA	NA	0.0184018	1.70411:1.70411:1:1:1:1	0.393204(0.514563:0.366505:0.298544)	NA	NA	NA	NA
	Unigene1651_All	Unigene16492_All	YN	0.00221125	0.0169115	0.130754	0.00382859	1719	359.988	1359.01	NA	9	6	3	NA	NA	0.00528973	3.20948:3.20948:1:1:1:1	0.433671(0.494941:0.334739:0.471332)	NA	NA	NA	NA
	Unigene9919_All	Unigene32936_All	YN	0.00333339	0.0255022	0.13071	0.0123105	801	199.632	601.368	NA	7	5	2	NA	NA	0.00885849	2.01103:2.01103:1:1:1:1	0.430607(0.509294:0.39777:0.384758)	NA	NA	NA	NA
	Unigene30607_All	Unigene37157_All	YN	0.00098273	0.00752858	0.130533	0.066764	1419	400.76	1018.24	NA	4	3	1	NA	NA	0.00283144	4.84447:4.84447:1:1:1:1	0.430208(0.50625:0.390625:0.39375)	NA	NA	NA	NA
	Unigene19477_All	Unigene8172_All	YN	0.00191727	0.0146951	0.13047	0.0121842	1389	344.464	1044.54	NA	7	5	2	NA	NA	0.00508608	2.86354:2.86354:1:1:1:1	0.442045(0.490281:0.390929:0.444924)	NA	NA	NA	NA
	Unigene38456_All	Unigene6594_All	YN	0.00236696	0.0182689	0.129562	0.00791511	1179	332.651	846.349	NA	8	6	2	NA	NA	0.00685364	1.8189:1.8189:1:1:1:1	0.48801(0.567146:0.491607:0.405276)	NA	NA	NA	NA
	Unigene13654_All	Unigene40147_All	YN	0.00224616	0.0173388	0.129545	0.0661089	621	175.039	445.961	NA	4	3	1	NA	NA	0.00650026	2:2:1:1:1:1	0.509662(0.570048:0.39372:0.565217)	NA	NA	NA	NA
	Unigene8777_All	Unigene37732_All	YN	0.00470478	0.0363441	0.129451	0.00155738	867	227.348	639.652	NA	11	8	3	NA	NA	0.0130014	4.66202:4.66202:1:1:1:1	0.410377(0.43239:0.429245:0.369497)	NA	NA	NA	NA
	Unigene39151_All	Unigene16913_All	YN	0.0123597	0.0955322	0.129378	2.38338e-05	636	146.376	489.624	NA	19	13	6	NA	NA	0.031502	2.23291:2.23291:1:1:1:1	0.422673(0.475225:0.349099:0.443694)	NA	NA	NA	NA
	Unigene37252_All	Unigene21760_All	YN	0.00287834	0.022267	0.129265	0.00229675	1365	320.726	1044.27	NA	10	7	3	NA	NA	0.00743399	2.92701:2.92701:1:1:1:1	0.421612(0.479121:0.437363:0.348352)	NA	NA	NA	NA
	Unigene661_All	Unigene20708_All	YN	0.00410748	0.031798	0.129174	0.000199785	1332	355.41	976.59	NA	15	11	4	NA	NA	0.011496	2.37875:2.37875:1:1:1:1	0.483483(0.538288:0.457207:0.454955)	NA	NA	NA	NA
	Unigene22599_All	Unigene19354_All	YN	0.00318657	0.0246922	0.129052	0.000446191	1629	370.968	1258.03	NA	13	9	4	NA	NA	0.00808399	2.16521:2.16521:1:1:1:1	0.418934(0.446429:0.428571:0.381803)	NA	NA	NA	NA
	Unigene2310_All	Unigene16698_All	YN	0.00765417	0.0593484	0.12897	2.67406e-07	1404	353.441	1050.56	NA	28	20	8	NA	NA	0.0206676	2.05182:2.05182:1:1:1:1	0.429487(0.456197:0.433761:0.398504)	NA	NA	NA	NA
	Unigene28206_All	Unigene69829_All	YN	0.00395052	0.0306565	0.128864	0.0119576	675	167.351	507.649	NA	7	5	2	NA	NA	0.0105717	2.35018:2.35018:1:1:1:1	0.438865(0.480349:0.451965:0.384279)	NA	NA	NA	NA
	Unigene36489_All	Unigene33833_All	YN	0.00226918	0.0176399	0.128639	0.00768473	1227	344.246	882.754	NA	8	6	2	NA	NA	0.00658159	1.88318:1.88318:1:1:1:1	0.427007(0.469586:0.400243:0.411192)	NA	NA	NA	NA
	Unigene40369_All	Unigene28245_All	YN	0.00632441	0.0492479	0.12842	0.00100665	666	189.643	476.357	NA	12	9	3	NA	NA	0.0185469	2.21169:2.21169:1:1:1:1	0.493243(0.536036:0.506757:0.436937)	NA	NA	NA	NA
	Unigene39978_All	Unigene26100_All	YN	0.00198999	0.0155283	0.128152	0.0114146	1332	325.636	1006.36	NA	7	5	2	NA	NA	0.00529972	3.91445:3.91445:1:1:1:1	0.413664(0.546171:0.350225:0.344595)	NA	NA	NA	NA
	Unigene32741_All	Unigene15751_All	YN	0.00332891	0.0259831	0.128118	0.0331621	720	117.807	602.193	NA	5	3	2	NA	NA	0.00703562	1.87234:1.87234:1:1:1:1	0.410519(0.473361:0.32377:0.434426)	NA	NA	NA	NA
	Unigene19517_All	Unigene26921_All	YN	0.00322266	0.025171	0.128031	0.000420926	1608	363.588	1244.41	NA	13	9	4	NA	NA	0.00818544	2:2:1:1:1:1	0.430037(0.516791:0.397388:0.375933)	NA	NA	NA	NA
	Unigene16001_All	Unigene3667_All	YN	0.00127086	0.00992821	0.128005	0.0644415	1092	304.462	787.538	NA	4	3	1	NA	NA	0.00368463	2.12974:2.12974:1:1:1:1	0.428114(0.456044:0.383242:0.445055)	NA	NA	NA	NA
	Unigene19417_All	Unigene33659_All	YN	0.00130559	0.0102341	0.127573	0.0640266	1062	295.398	766.602	NA	4	3	1	NA	NA	0.00378907	4.72868:4.72868:1:1:1:1	0.413615(0.48169:0.35493:0.404225)	NA	NA	NA	NA
	Unigene19243_All	Unigene39076_All	YN	0.00422916	0.0331837	0.127447	0.00064999	1020	308.614	711.386	NA	13	10	3	NA	NA	0.0129897	2.42811:2.42811:1:1:1:1	0.518006(0.566482:0.677285:0.310249)	NA	NA	NA	NA
	Unigene29744_All	Unigene37703_All	YN	0.00398741	0.0313258	0.127288	0.00754099	699	196.087	502.913	NA	8	6	2	NA	NA	0.0116565	1.94603:1.94603:1:1:1:1	0.491416(0.474249:0.502146:0.497854)	NA	NA	NA	NA
	Unigene7476_All	Unigene15853_All	YN	0.00367192	0.0288565	0.127248	0.00017551	1482	389.925	1092.08	NA	15	11	4	NA	NA	0.0102982	2.11067:2.11067:1:1:1:1	0.439609(0.495951:0.395749:0.427126)	NA	NA	NA	NA
	Unigene9427_All	Unigene19200_All	YN	0.00330877	0.0261318	0.126619	0.00734078	840	234.168	605.832	NA	8	6	2	NA	NA	0.00967118	2.4463:2.4463:1:1:1:1	0.490476(0.553571:0.439286:0.478571)	NA	NA	NA	NA
	Unigene5810_All	Unigene22441_All	YN	0.00415686	0.0328331	0.126606	0.00136981	975	250.891	724.109	NA	11	8	3	NA	NA	0.011536	4.38307:4.38307:1:1:1:1	0.429231(0.532308:0.373846:0.381538)	NA	NA	NA	NA
	Unigene19531_All	Unigene33909_All	YN	0.00259477	0.020523	0.126433	0.000892538	1605	446.823	1158.18	NA	12	9	3	NA	NA	0.00758589	2.57275:2.57275:1:1:1:1	0.397976(0.423272:0.388702:0.381956)	NA	NA	NA	NA
	Unigene7113_All	Unigene18722_All	YN	0.00237437	0.0188103	0.126227	0.0108297	1113	269.159	843.841	NA	7	5	2	NA	NA	0.00634911	2:2:1:1:1:1	0.417341(0.390836:0.493261:0.367925)	NA	NA	NA	NA
	Unigene27736_All	Unigene5681_All	YN	0.00283355	0.0224928	0.125976	0.0107877	933	225.643	707.357	NA	7	5	2	NA	NA	0.00758808	2:2:1:1:1:1	0.503751(0.554662:0.430868:0.525723)	NA	NA	NA	NA
	Unigene16554_All	Unigene16456_All	YN	0.00212552	0.0168745	0.12596	0.0107391	1242	299.651	942.349	NA	7	5	2	NA	NA	0.00568393	1.75642:1.75642:1:1:1:1	0.485105(0.592995:0.551932:0.310386)	NA	NA	NA	NA
	Unigene5716_All	Unigene2113_All	YN	0.00233106	0.0185107	0.12593	0.0020989	594	164.343	429.657	NA	4	3	1	NA	NA	0.00680752	3.68902:3.68902:1:1:1:1	0.451178(0.558081:0.373737:0.421717)	NA	NA	NA	NA
	Unigene23117_All	Unigene24215_All	YN	0.00327185	0.0260312	0.125689	0.00331548	1155	236.077	918.923	NA	9	6	3	NA	NA	0.00792377	0.990694:0.990694:1:1:1:1	0.440693(0.488312:0.458442:0.375325)	NA	NA	NA	NA
	Unigene19014_All	Unigene23019_All	YN	0.00218183	0.0173612	0.125673	0.000699538	1269	350.825	918.175	NA	8	6	2	NA	NA	0.00637827	5.49079:5.49079:1:1:1:1	0.433036(0.537946:0.424107:0.337054)	NA	NA	NA	NA
	Unigene21513_All	Unigene4240_All	YN	0.00394593	0.0314846	0.125329	7.55453e-05	1629	358.255	1270.75	NA	16	11	5	NA	NA	0.0100023	1.40066:1.40066:1:1:1:1	0.417277(0.5:0.384615:0.367216)	NA	NA	NA	NA
	Unigene28191_All	Unigene17801_All	YN	0.00438242	0.035008	0.125183	0.000240778	1209	293.481	915.519	NA	14	10	4	NA	NA	0.0118167	2.19008:2.19008:1:1:1:1	0.422168(0.496333:0.391198:0.378973)	NA	NA	NA	NA
	Unigene39246_All	Unigene27288_All	YN	0.0025275	0.020192	0.125173	0.00703039	1095	302.37	792.63	NA	8	6	2	NA	NA	0.00740533	6.42712:6.42712:1:1:1:1	0.46206(0.575881:0.441734:0.368564)	NA	NA	NA	NA
	Unigene7595_All	Unigene9009_All	YN	0.00453836	0.0362934	0.125046	0.000387439	1140	255.924	884.076	NA	13	9	4	NA	NA	0.0116672	1.27201:1.27201:1:1:1:1	0.45614(0.509211:0.515789:0.343421)	NA	NA	NA	NA
	Unigene1037_All	Unigene26360_All	YN	0.00349298	0.0279919	0.124785	0.0105101	756	182.034	573.966	NA	7	5	2	NA	NA	0.00939196	2.3582:2.3582:1:1:1:1	0.400654(0.488235:0.313725:0.4)	NA	NA	NA	NA
	Unigene50_All	Unigene2854_All	YN	0.00245346	0.0196669	0.12475	0.00121922	1638	413.234	1224.77	NA	11	8	3	NA	NA	0.00679606	2.17187:2.17187:1:1:1:1	0.418856(0.492119:0.367776:0.396673)	NA	NA	NA	NA
	Unigene38342_All	Unigene32193_All	YN	0.00240911	0.0193251	0.124662	0.00121319	1668	420.471	1247.53	NA	11	8	3	NA	NA	0.00667331	2.22512:2.22512:1:1:1:1	0.427852(0.505872:0.384228:0.393456)	NA	NA	NA	NA
	Unigene8825_All	Unigene23798_All	YN	0.00199829	0.0160716	0.124337	0.0103009	1317	314.759	1002.24	NA	7	5	2	NA	NA	0.00536177	1.8424:1.8424:1:1:1:1	0.457099(0.529613:0.412301:0.429385)	NA	NA	NA	NA
	Unigene39167_All	Unigene33667_All	YN	0.0043889	0.0353068	0.124308	0.000363374	1176	261.849	914.151	NA	13	9	4	NA	NA	0.0112731	2.03824:2.03824:1:1:1:1	0.422249(0.476077:0.405502:0.385167)	NA	NA	NA	NA
	Unigene42122_All	Unigene28279_All	YN	0.00336275	0.0271326	0.123938	0.00675766	822	225.724	596.276	NA	8	6	2	NA	NA	0.00989002	3.54604:3.54604:1:1:1:1	0.447689(0.536496:0.430657:0.375912)	NA	NA	NA	NA
	Unigene3366_All	Unigene5767_All	YN	0.00351781	0.0283863	0.123926	0.0103016	750	179.806	570.194	NA	7	5	2	NA	NA	0.00947982	2:2:1:1:1:1	0.432367(0.646739:0.306159:0.344203)	NA	NA	NA	NA
	Unigene1139_All	Unigene51591_All	YN	0.000959513	0.00776064	0.123638	0.0979117	1302	259.137	1042.86	NA	3	2	1	NA	NA	0.00231314	2:2:1:1:1:1	0.408218(0.480415:0.456221:0.288018)	NA	NA	NA	NA
	Unigene6027_All	Unigene22172_All	YN	0.00119851	0.00972196	0.123278	0.00196407	1146	310.872	835.128	NA	4	3	1	NA	NA	0.00351064	1.84734:1.84734:1:1:1:1	0.475567(0.45288:0.458115:0.515707)	NA	NA	NA	NA
	Unigene37686_All	Unigene21731_All	YN	0.00599883	0.0487704	0.123001	6.80953e-05	948	278	670	NA	17	13	4	NA	NA	0.0185415	6.66692:6.66692:1:1:1:1	0.458861(0.552215:0.416139:0.408228)	NA	NA	NA	NA
	Unigene26734_All	Unigene14536_All	YN	0.00142586	0.0116007	0.122911	0.0596242	963	260.882	702.118	NA	4	3	1	NA	NA	0.00418229	4.7472:4.7472:1:1:1:1	0.411959(0.478814:0.371469:0.385593)	NA	NA	NA	NA
	Unigene15203_All	Unigene1191_All	YN	0.00292979	0.023841	0.122888	6.45547e-05	2181	470.95	1710.05	NA	16	11	5	NA	NA	0.00744521	2.45583:2.45583:1:1:1:1	0.427448(0.512129:0.407008:0.363208)	NA	NA	NA	NA
	Unigene20354_All	Unigene38232_All	YN	0.00534688	0.0435466	0.122785	4.31457e-07	1767	452.366	1314.63	NA	26	19	7	NA	NA	0.0151263	4.21912:4.21912:1:1:1:1	0.436661(0.512882:0.419485:0.377617)	NA	NA	NA	NA
	Unigene36366_All	Unigene991_All	YN	0.00663493	0.0540755	0.122697	0.000116884	951	193.997	757.003	NA	15	10	5	NA	NA	0.0163125	1.18299:1.18299:1:1:1:1	0.42348(0.551887:0.382075:0.336478)	NA	NA	NA	NA
	Unigene19830_All	Unigene57007_All	YN	0.00424244	0.0345791	0.122688	0.00116472	948	238.605	709.395	NA	11	8	3	NA	NA	0.011878	3.99223:3.99223:1:1:1:1	0.423523(0.53481:0.370253:0.365506)	NA	NA	NA	NA
	Unigene9721_All	Unigene32841_All	YN	0.00423007	0.0344855	0.122662	3.0682e-07	2433	536.366	1896.63	NA	26	18	8	NA	NA	0.0109	1.66308:1.66308:1:1:1:1	0.4291(0.520962:0.375462:0.390875)	NA	NA	NA	NA
	Unigene71042_All	Unigene1324_All	YN	0.00180959	0.0147549	0.122643	0.0595496	759	205.639	553.361	NA	4	3	1	NA	NA	0.00531692	2.02841:2.02841:1:1:1:1	0.444048(0.478571:0.448214:0.405357)	NA	NA	NA	NA
	Unigene36145_All	Unigene25007_All	YN	0.0031106	0.0256165	0.12143	0.00957038	843	198.703	644.297	NA	7	5	2	NA	NA	0.00841544	0.831728:0.831728:1:1:1:1	0.401338(0.421405:0.389632:0.392977)	NA	NA	NA	NA
	Unigene28185_All	Unigene16435_All	YN	0.00182062	0.0150392	0.121058	0.000118347	2940	740.184	2199.82	NA	15	11	4	NA	NA	0.00514858	2.15227:2.15227:1:1:1:1	0.439456(0.523469:0.396429:0.398469)	NA	NA	NA	NA
	Unigene7048_All	Unigene31229_All	YN	0.00565145	0.0470109	0.120216	0.000302407	909	198.516	710.484	NA	13	9	4	NA	NA	0.0146839	1.22977:1.22977:1:1:1:1	0.439815(0.555556:0.432099:0.33179)	NA	NA	NA	NA
	Unigene15811_All	Unigene4145_All	YN	0.00256692	0.0213891	0.120011	0.000652229	1599	428.278	1170.72	NA	12	9	3	NA	NA	0.00760827	2.57078:2.57078:1:1:1:1	0.461226(0.521576:0.458724:0.403377)	NA	NA	NA	NA
	Unigene21583_All	Unigene60690_All	YN	0.0044342	0.0369686	0.119945	0.00419239	648	195.582	452.418	NA	9	7	2	NA	NA	0.0142538	3.07129:3.07129:1:1:1:1	0.416306(0.45671:0.339827:0.452381)	NA	NA	NA	NA
	Unigene42787_All	Unigene36294_All	YN	0.00293241	0.0244824	0.119776	0.00908883	891	207.579	683.421	NA	7	5	2	NA	NA	0.007953	2:2:1:1:1:1	0.432099(0.513468:0.400673:0.382155)	NA	NA	NA	NA
	Unigene42481_All	Unigene26376_All	YN	0.00486293	0.0406538	0.119618	0.000997414	822	202.834	619.166	NA	11	8	3	NA	NA	0.0136946	2.01118:2.01118:1:1:1:1	0.44708(0.536496:0.425182:0.379562)	NA	NA	NA	NA
	Unigene9244_All	Unigene5799_All	YN	0.00293389	0.0245369	0.119571	0.00591008	933	249.779	683.221	NA	8	6	2	NA	NA	0.00871735	5.53534:5.53534:1:1:1:1	0.439979(0.536977:0.424437:0.358521)	NA	NA	NA	NA
	Unigene71305_All	Unigene23630_All	YN	0.0045818	0.0383222	0.11956	0.000296865	1119	243.195	875.805	NA	13	9	4	NA	NA	0.0119147	1.88472:1.88472:1:1:1:1	0.427807(0.474599:0.429144:0.379679)	NA	NA	NA	NA
	Unigene18207_All	Unigene1787_All	YN	0.00369206	0.0308908	0.11952	0.000639809	1113	298.181	814.819	NA	12	9	3	NA	NA	0.0109788	4.8962:4.8962:1:1:1:1	0.407895(0.514474:0.359211:0.35)	NA	NA	NA	NA
	Unigene274_All	Unigene251_All	YN	0.00754841	0.0631733	0.119487	1.04592e-05	918	251.921	666.079	NA	20	15	5	NA	NA	0.0228132	4.2632:4.2632:1:1:1:1	0.431217(0.553968:0.338095:0.401587)	NA	NA	NA	NA
	Unigene41961_All	Unigene17397_All	YN	0.00503575	0.0421911	0.119356	0.00261879	744	146.248	597.752	NA	9	6	3	NA	NA	0.0123394	0.978023:0.978023:1:1:1:1	0.406489(0.564885:0.366412:0.288168)	NA	NA	NA	NA
	Unigene8010_All	Unigene2559_All	YN	0.00086543	0.00725591	0.119272	0.0560146	1572	415.734	1156.27	NA	4	3	1	NA	NA	0.00255547	5.02128:5.02128:1:1:1:1	0.427799(0.517176:0.419847:0.346374)	NA	NA	NA	NA
	Unigene3432_All	Unigene3186_All	YN	0.00355111	0.0297746	0.119267	0.00261132	1053	206.157	846.843	NA	9	6	3	NA	NA	0.00868517	1.33448:1.33448:1:1:1:1	0.40076(0.539886:0.30057:0.361823)	NA	NA	NA	NA
	Unigene20015_All	Unigene29885_All	YN	0.00198338	0.0166896	0.11884	0.00564717	1374	364.044	1009.96	NA	8	6	2	NA	NA	0.00587981	4.38895:4.38895:1:1:1:1	0.434134(0.515284:0.375546:0.411572)	NA	NA	NA	NA
	Unigene21006_All	Unigene29552_All	YN	0.00105107	0.00885894	0.118645	0.0555188	1293	340.922	952.078	NA	4	3	1	NA	NA	0.00310975	4.10238:4.10238:1:1:1:1	0.440062(0.588167:0.37587:0.356148)	NA	NA	NA	NA
	Unigene34336_All	Unigene35689_All	YN	0.00630557	0.0531851	0.118559	8.07622e-06	1089	292.425	796.575	NA	20	15	5	NA	NA	0.018894	5.00261:5.00261:1:1:1:1	0.406579(0.489474:0.376316:0.353947)	NA	NA	NA	NA
	Unigene7581_All	Unigene63_All	YN	0.00403543	0.0340916	0.11837	0.000946049	987	241.329	745.671	NA	11	8	3	NA	NA	0.0113844	2.39809:2.39809:1:1:1:1	0.409972(0.480609:0.382271:0.367036)	NA	NA	NA	NA
	Unigene36445_All	Unigene40103_All	YN	0.00153426	0.0130337	0.117714	0.0548375	885	232.459	652.541	NA	4	3	1	NA	NA	0.00455476	2:2:1:1:1:1	0.456497(0.457627:0.494915:0.416949)	NA	NA	NA	NA
	Unigene74092_All	Unigene23229_All	YN	0.00388403	0.0330147	0.117645	0.00877803	672	155.694	516.306	NA	7	5	2	NA	NA	0.0106332	8.38222:8.38222:1:1:1:1	0.392473(0.457661:0.447581:0.272177)	NA	NA	NA	NA
	Unigene30346_All	Unigene35616_All	YN	0.000976995	0.00833836	0.117169	0.0540503	1386	361.787	1024.21	NA	4	3	1	NA	NA	0.00289853	2:2:1:1:1:1	0.445621(0.502119:0.369703:0.465042)	NA	NA	NA	NA
	Unigene29737_All	Unigene33997_All	YN	0.00215713	0.0184481	0.116929	0.0023365	1722	329.252	1392.75	NA	9	6	3	NA	NA	0.00527203	0.950499:0.950499:1:1:1:1	0.445122(0.512195:0.373693:0.449477)	NA	NA	NA	NA
	Unigene7026_All	Unigene8225_All	YN	0.00176999	0.0151718	0.116663	0.0904404	699	133.239	565.761	NA	3	2	1	NA	NA	0.00432457	2.0848:2.0848:1:1:1:1	0.43291(0.444915:0.413136:0.440678)	NA	NA	NA	NA
	Unigene29830_All	Unigene16329_All	YN	0.00307079	0.0263339	0.11661	0.00358158	924	271.322	652.678	NA	9	7	2	NA	NA	0.00990174	3.20522:3.20522:1:1:1:1	0.471861(0.550325:0.400974:0.464286)	NA	NA	NA	NA
	Unigene36538_All	Unigene26883_All	YN	0.00208868	0.0179255	0.11652	0.00526904	1299	339.915	959.085	NA	8	6	2	NA	NA	0.00623277	4.72972:4.72972:1:1:1:1	0.447652(0.566975:0.428406:0.347575)	NA	NA	NA	NA
	Unigene19322_All	Unigene35073_All	YN	0.0021007	0.0180404	0.116445	0.00166065	645	168.302	476.698	NA	4	3	1	NA	NA	0.00625989	2:2:1:1:1:1	0.403101(0.42093:0.306977:0.481395)	NA	NA	NA	NA
	Unigene254_All	Unigene11361_All	YN	0.00176964	0.0152103	0.116345	0.0535433	765	199.248	565.752	NA	4	3	1	NA	NA	0.00527033	2:2:1:1:1:1	0.480392(0.572549:0.384314:0.484314)	NA	NA	NA	NA
	Unigene36367_All	Unigene8280_All	YN	0.00385764	0.0332358	0.116069	0.000830142	1026	246.322	779.678	NA	11	8	3	NA	NA	0.0109107	2:2:1:1:1:1	0.434698(0.52193:0.415205:0.366959)	NA	NA	NA	NA
	Unigene5761_All	Unigene26594_All	YN	0.00300462	0.0259417	0.115822	0.00823336	864	197.023	666.977	NA	7	5	2	NA	NA	0.0082351	2:2:1:1:1:1	0.44752(0.538062:0.430796:0.373702)	NA	NA	NA	NA
	Unigene61804_All	Unigene488_All	YN	0.00450412	0.0388932	0.115807	0.000139537	1155	264.157	890.843	NA	14	10	4	NA	NA	0.0123692	1.80953:1.80953:1:1:1:1	0.438144(0.539948:0.39433:0.380155)	NA	NA	NA	NA
	Unigene28158_All	Unigene16988_All	YN	0.0030529	0.0264345	0.115489	0.00801618	849	192.499	656.501	NA	7	5	2	NA	NA	0.00835437	1.95355:1.95355:1:1:1:1	0.409188(0.445513:0.43109:0.350962)	NA	NA	NA	NA
	Unigene33136_All	Unigene31828_All	YN	0.00430217	0.0375062	0.114706	0.000777553	918	218.676	699.324	NA	11	8	3	NA	NA	0.0122117	2:2:1:1:1:1	0.490354(0.554662:0.366559:0.549839)	NA	NA	NA	NA
	Unigene125_All	Unigene3480_All	YN	0.0022059	0.0192418	0.114641	0.052105	612	157.919	454.081	NA	4	3	1	NA	NA	0.00660181	2:2:1:1:1:1	0.443662(0.561033:0.380282:0.389671)	NA	NA	NA	NA
	Unigene29917_All	Unigene63362_All	YN	0.00397959	0.0347844	0.114408	0.00781509	651	147.102	503.898	NA	7	5	2	NA	NA	0.0109403	2:2:1:1:1:1	0.43702(0.516129:0.400922:0.394009)	NA	NA	NA	NA
	Unigene26419_All	Unigene2360_All	YN	0.00253731	0.0222112	0.114235	0.000442681	1065	275.385	789.615	NA	8	6	2	NA	NA	0.00762455	3.99753:3.99753:1:1:1:1	0.455649(0.553221:0.452381:0.361345)	NA	NA	NA	NA
	Unigene22185_All	Unigene26864_All	YN	0.00116818	0.0102322	0.114166	0.0513704	1152	295.196	856.804	NA	4	3	1	NA	NA	0.00349081	2:2:1:1:1:1	0.432099(0.51358:0.354321:0.428395)	NA	NA	NA	NA
	Unigene19221_All	Unigene15465_All	YN	0.00416359	0.0365331	0.113968	8.28972e-05	1275	311.559	963.441	NA	15	11	4	NA	NA	0.0120734	4.12144:4.12144:1:1:1:1	0.430588(0.501176:0.442353:0.348235)	NA	NA	NA	NA
	Unigene7936_All	Unigene24859_All	YN	0.00204247	0.0179256	0.113942	0.00758405	1263	282.278	980.722	NA	7	5	2	NA	NA	0.00559231	2:2:1:1:1:1	0.421219(0.489311:0.401425:0.372922)	NA	NA	NA	NA
	Unigene24671_All	Unigene6954_All	YN	0.00527045	0.0463309	0.113757	0.000421658	780	199.409	580.591	NA	12	8.95202	3.04798	NA	NA	0.0157676	3.98357:3.98357:1:1:1:1	0.445283(0.535849:0.445283:0.354717)	NA	NA	NA	NA
	Unigene38597_All	Unigene16469_All	YN	0.00144193	0.012725	0.113315	0.00742849	1785	396.589	1388.41	NA	7	5	2	NA	NA	0.00394878	1.89792:1.89792:1:1:1:1	0.431373(0.529412:0.351261:0.413445)	NA	NA	NA	NA
	Unigene11936_All	Unigene25037_All	YN	0.00124717	0.0110239	0.113134	0.0505669	1077	274.413	802.587	NA	4	3	1	NA	NA	0.00373823	4.99141:4.99141:1:1:1:1	0.410399(0.508357:0.381616:0.341226)	NA	NA	NA	NA
	Unigene260_All	Unigene13152_All	YN	0.00196453	0.0173956	0.112933	0.00308447	1428	408.613	1019.39	NA	9	7	2	NA	NA	0.00638005	4.06318:4.06318:1:1:1:1	0.462535(0.519958:0.427521:0.440126)	NA	NA	NA	NA
	Unigene2734_All	Unigene2554_All	YN	0.00176343	0.0156176	0.112913	0.0504585	762	194.17	567.83	NA	4	3	1	NA	NA	0.0052937	1.20573:1.20573:1:1:1:1	0.471785(0.594488:0.456693:0.364173)	NA	NA	NA	NA
	Unigene48241_All	Unigene20461_All	YN	0.00281951	0.025064	0.112493	0.00113697	1350	283.978	1066.02	NA	10	7	3	NA	NA	0.00749873	0.991914:0.991914:1:1:1:1	0.406936(0.426752:0.430998:0.363057)	NA	NA	NA	NA
	Unigene2605_All	Unigene2427_All	YN	0.00501133	0.0445651	0.11245	1.24028e-06	1572	370.554	1201.45	NA	22	16	6	NA	NA	0.014335	2.48731:2.48731:1:1:1:1	0.411802(0.503766:0.367232:0.364407)	NA	NA	NA	NA
	Unigene138_All	Unigene2898_All	YN	0.00821994	0.0732101	0.112279	7.57841e-05	648	158.594	489.406	NA	15	11	4	NA	NA	0.0241259	1.89314:1.89314:1:1:1:1	0.45216(0.534722:0.328704:0.493056)	NA	NA	NA	NA
	Unigene42841_All	Unigene1572_All	YN	0.000895905	0.007997	0.11203	0.0493899	1494	377.144	1116.86	NA	4	3	1	NA	NA	0.0026885	2:2:1:1:1:1	0.433066(0.513052:0.369478:0.416667)	NA	NA	NA	NA
	Unigene19338_All	Unigene3006_All	YN	0.00273816	0.0244846	0.111832	0.00442774	981	249.073	731.927	NA	8	6	2	NA	NA	0.00825953	2:2:1:1:1:1	0.449032(0.530581:0.376147:0.440367)	NA	NA	NA	NA
	Unigene25731_All	Unigene67671_All	YN	0.00364883	0.0326497	0.111757	0.00450511	738	188.37	549.63	NA	8	6	2	NA	NA	0.0110511	2.20134:2.20134:1:1:1:1	0.446477(0.449187:0.45935:0.430894)	NA	NA	NA	NA
	Unigene19214_All	Unigene38503_All	YN	0.00192462	0.0172277	0.111716	0.00714686	1335	294.45	1040.55	NA	7	5	2	NA	NA	0.0052999	2.37733:2.37733:1:1:1:1	0.422846(0.511236:0.38764:0.369663)	NA	NA	NA	NA
	Unigene16963_All	Unigene14090_All	YN	0.00381258	0.0341391	0.111678	1.97379e-06	1827	511.913	1315.09	NA	22	17	5	NA	NA	0.0123099	5.11355:5.11355:1:1:1:1	0.41954(0.504105:0.362069:0.392447)	NA	NA	NA	NA
	Unigene17264_All	Unigene29983_All	YN	0.00188481	0.016884	0.111633	0.0493144	711	179.69	531.31	NA	4	3	1	NA	NA	0.00567554	2:2:1:1:1:1	0.454993(0.535865:0.405063:0.424051)	NA	NA	NA	NA
	Unigene19988_All	Unigene26863_All	YN	0.00256942	0.0230579	0.111433	0.0043611	1044	264.235	779.765	NA	8	6	2	NA	NA	0.00775503	2.0132:2.0132:1:1:1:1	0.429253(0.490885:0.38151:0.415365)	NA	NA	NA	NA
	Unigene4180_All	Unigene202_All	YN	0.002812	0.0252731	0.111265	0.00434452	954	241.429	712.571	NA	8	6	2	NA	NA	0.00849624	2:2:1:1:1:1	0.452899(0.513975:0.479814:0.364907)	NA	NA	NA	NA
	Unigene41532_All	Unigene36738_All	YN	0.00225673	0.0203035	0.11115	0.0491654	594	150.051	443.949	NA	4	3	1	NA	NA	0.00681554	5.60043:5.60043:1:1:1:1	0.423401(0.560606:0.388889:0.320707)	NA	NA	NA	NA
	Unigene35644_All	Unigene16349_All	YN	0.00150142	0.0135146	0.111097	0.0488781	891	224.298	666.702	NA	4	3	1	NA	NA	0.00452558	4.59046:4.59046:1:1:1:1	0.448934(0.56734:0.451178:0.328283)	NA	NA	NA	NA
	Unigene27630_All	Unigene37361_All	YN	0.00137926	0.0124355	0.110914	0.0485658	969	243.307	725.693	NA	4	3	1	NA	NA	0.00415537	2:2:1:1:1:1	0.433437(0.479876:0.342105:0.478328)	NA	NA	NA	NA
	Unigene37443_All	Unigene30831_All	YN	0.0013754	0.0124021	0.110901	0.0486278	972	244.173	727.827	NA	4	3	1	NA	NA	0.00414538	2.15711:2.15711:1:1:1:1	0.46728(0.596626:0.404908:0.400307)	NA	NA	NA	NA
	Unigene30120_All	Unigene25281_All	YN	0.00499958	0.0450943	0.110869	5.1777e-05	1233	229.204	1003.8	NA	15	10	5	NA	NA	0.0124528	1.69012:1.69012:1:1:1:1	0.404157(0.41455:0.356813:0.441109)	NA	NA	NA	NA
	Unigene9955_All	Unigene7462_All	YN	0.00312637	0.0282528	0.110657	0.00430594	858	216.947	641.053	NA	8	6	2	NA	NA	0.00947965	3.92302:3.92302:1:1:1:1	0.418998(0.452797:0.466783:0.337413)	NA	NA	NA	NA
	Unigene17060_All	Unigene9548_All	YN	0.00393942	0.0356213	0.110592	0.00201061	741	231.789	509.211	NA	10	8	2	NA	NA	0.0138497	8.02874:8.02874:1:1:1:1	0.441476(0.501908:0.379771:0.442748)	NA	NA	NA	NA
	Unigene30464_All	Unigene943_All	YN	0.00359784	0.0325533	0.110521	0.00105156	1056	219.898	836.102	NA	10	7	3	NA	NA	0.00962744	0.943861:0.943861:1:1:1:1	0.459155(0.459155:0.45493:0.46338)	NA	NA	NA	NA
	Unigene26517_All	Unigene23705_All	YN	0.00212353	0.0192214	0.110477	0.0485874	630	158.419	471.581	NA	4	3	1	NA	NA	0.00642296	2:2:1:1:1:1	0.469841(0.516667:0.509524:0.383333)	NA	NA	NA	NA
	Unigene19419_All	Unigene16482_All	YN	0.00055807	0.00505773	0.11034	0.0478431	2388	595.442	1792.56	NA	4	3	1	NA	NA	0.00168005	2.51675:2.51675:1:1:1:1	0.436434(0.540698:0.410465:0.35814)	NA	NA	NA	NA
	Unigene19059_All	Unigene33772_All	YN	0.00274922	0.0249266	0.110293	0.000388448	1461	367.519	1093.48	NA	12	9	3	NA	NA	0.00832802	3.25063:3.25063:1:1:1:1	0.45243(0.501027:0.446612:0.409651)	NA	NA	NA	NA
	Unigene17044_All	Unigene29716_All	YN	0.00282595	0.0256382	0.110224	3.81973e-05	1896	477.74	1418.26	NA	16	12	4	NA	NA	0.00857402	3.52319:3.52319:1:1:1:1	0.415438(0.520649:0.337021:0.388643)	NA	NA	NA	NA
	Unigene33461_All	Unigene37642_All	YN	0.00471105	0.0427613	0.110171	0.000274911	882	243.158	638.842	NA	13	10	3	NA	NA	0.0152011	3.25277:3.25277:1:1:1:1	0.493197(0.537415:0.489796:0.452381)	NA	NA	NA	NA
	Unigene64018_All	Unigene12096_All	YN	0.00263014	0.0239608	0.109769	0.000358707	1017	255.01	761.99	NA	8	6	2	NA	NA	0.00797874	2.17086:2.17086:1:1:1:1	0.419118(0.544118:0.314706:0.398529)	NA	NA	NA	NA
	Unigene12957_All	Unigene28260_All	YN	0.00472243	0.0430398	0.109722	9.54793e-06	1374	311.81	1062.19	NA	18	13	5	NA	NA	0.013418	1.10021:1.10021:1:1:1:1	0.444687(0.562227:0.386463:0.385371)	NA	NA	NA	NA
	Unigene39372_All	Unigene35390_All	YN	0.00189296	0.0172662	0.109634	0.0477351	705	176.061	528.939	NA	4	3	1	NA	NA	0.00573214	2:2:1:1:1:1	0.432624(0.504255:0.417021:0.376596)	NA	NA	NA	NA
	Unigene1152_All	Unigene34349_All	YN	0.00225971	0.02063	0.109535	0.0477485	591	147.702	443.298	NA	4	3	1	NA	NA	0.00685081	2.28166:2.28166:1:1:1:1	0.461083(0.489848:0.42132:0.472081)	NA	NA	NA	NA
	Unigene41513_All	Unigene37736_All	YN	0.000767535	0.0070082	0.10952	0.0471961	1734	430.367	1303.63	NA	4	3	1	NA	NA	0.00231643	2:2:1:1:1:1	0.422713(0.518927:0.351735:0.397476)	NA	NA	NA	NA
	Unigene39169_All	Unigene29940_All	YN	0.00190812	0.0174448	0.109381	0.0475039	699	174.256	524.744	NA	4	3	1	NA	NA	0.0057813	2:2:1:1:1:1	0.439914(0.465665:0.369099:0.484979)	NA	NA	NA	NA
	Unigene28950_All	Unigene8051_All	YN	0.00382037	0.0349278	0.109379	5.82678e-06	1725	412.818	1312.18	NA	19	14	5	NA	NA	0.0112648	1.12696:1.12696:1:1:1:1	0.452464(0.515652:0.444348:0.397391)	NA	NA	NA	NA
	Unigene1982_All	Unigene34089_All	YN	0.00421627	0.0385491	0.109374	0.00416256	636	160.254	475.746	NA	8	6	2	NA	NA	0.0128672	2.40281:2.40281:1:1:1:1	0.446541(0.558962:0.382075:0.398585)	NA	NA	NA	NA
	Unigene19369_All	Unigene33594_All	YN	0.0016207	0.0148336	0.109258	0.0471883	822	204.314	617.686	NA	4	3	1	NA	NA	0.00490487	1.15775:1.15775:1:1:1:1	0.448905(0.465328:0.419708:0.461679)	NA	NA	NA	NA
	Unigene18814_All	Unigene16459_All	YN	0.00159708	0.0146209	0.109233	0.00651123	1599	345.321	1253.68	NA	7	5	2	NA	NA	0.0044097	1.83074:1.83074:1:1:1:1	0.426829(0.469981:0.385553:0.424953)	NA	NA	NA	NA
	Unigene14372_All	Unigene1576_All	YN	0.00199332	0.0182511	0.109217	0.0473918	669	166.658	502.342	NA	4	3	1	NA	NA	0.00604339	2.28541:2.28541:1:1:1:1	0.456101(0.575893:0.435268:0.357143)	NA	NA	NA	NA
	Unigene38575_All	Unigene22171_All	YN	0.00280274	0.0256753	0.109161	0.00410062	954	238.911	715.089	NA	8	6	2	NA	NA	0.00853075	1.81056:1.81056:1:1:1:1	0.449588(0.483025:0.425926:0.439815)	NA	NA	NA	NA
	Unigene25637_All	Unigene35601_All	YN	0.00178371	0.0163491	0.109101	0.00398148	1494	371.221	1122.78	NA	8	6	2	NA	NA	0.00540284	1.73978:1.73978:1:1:1:1	0.442102(0.517068:0.424699:0.384538)	NA	NA	NA	NA
	Unigene20582_All	Unigene31471_All	YN	0.00142403	0.0130879	0.108805	0.00393541	1869	463.005	1406	NA	8	6	2	NA	NA	0.00431351	1.8663:1.8663:1:1:1:1	0.482879(0.47512:0.438202:0.535313)	NA	NA	NA	NA
	Unigene36530_All	Unigene34816_All	YN	0.00207299	0.0191195	0.108423	0.00388376	1284	317.833	966.167	NA	8	6	2	NA	NA	0.00629257	1.95872:1.95872:1:1:1:1	0.452103(0.544393:0.428738:0.383178)	NA	NA	NA	NA
	Unigene3789_All	Unigene16627_All	YN	0.00287891	0.0265642	0.108376	0.00643863	888	191.91	696.09	NA	7	5	2	NA	NA	0.00799765	1.15961:1.15961:1:1:1:1	0.440315(0.505068:0.405405:0.410473)	NA	NA	NA	NA
	Unigene42743_All	Unigene40167_All	YN	0.0044288	0.0410974	0.107763	0.00386852	603	150.031	452.969	NA	8	6	2	NA	NA	0.0135522	2.02726:2.02726:1:1:1:1	0.467593(0.49537:0.386574:0.520833)	NA	NA	NA	NA
	Unigene36647_All	Unigene19695_All	YN	0.00515322	0.0479892	0.107383	9.43634e-06	1104	324.586	779.414	NA	19	15	4	NA	NA	0.0177474	5.62617:5.62617:1:1:1:1	0.490942(0.555707:0.399457:0.517663)	NA	NA	NA	NA
	Unigene5880_All	Unigene5419_All	YN	0.00492375	0.0459007	0.10727	0.00125964	612	204.302	407.698	NA	11	9	2	NA	NA	0.018603	12.8281:12.8281:1:1:1:1	0.488562(0.595588:0.401961:0.468137)	NA	NA	NA	NA
	Unigene42006_All	Unigene33017_All	YN	0.00128672	0.0120621	0.106675	0.0449821	1029	251.162	777.838	NA	4	3	1	NA	NA	0.00391681	2:2:1:1:1:1	0.473275(0.54519:0.406706:0.46793)	NA	NA	NA	NA
	Unigene8736_All	Unigene22757_All	YN	0.00271223	0.0254342	0.106637	0.00606828	939	200.265	738.735	NA	7	5	2	NA	NA	0.00755824	1.10939:1.10939:1:1:1:1	0.450479(0.549521:0.392971:0.408946)	NA	NA	NA	NA
	Unigene29594_All	Unigene8315_All	YN	0.00173778	0.0163389	0.106359	0.0448092	762	185.885	576.115	NA	4	3	1	NA	NA	0.00529963	2:2:1:1:1:1	0.458015(0.465649:0.389313:0.519084)	NA	NA	NA	NA
	Unigene19323_All	Unigene28017_All	YN	0.00617503	0.0580777	0.106324	0.000147832	687	198.911	488.089	NA	14	11	3	NA	NA	0.0212027	6.24032:6.24032:1:1:1:1	0.454876(0.524017:0.408297:0.432314)	NA	NA	NA	NA
	Unigene10863_All	Unigene33888_All	YN	0.00131587	0.0123872	0.106228	0.0445139	1005	244.379	760.621	NA	4	3	1	NA	NA	0.00400802	1.55429:1.55429:1:1:1:1	0.45183(0.463873:0.407514:0.484104)	NA	NA	NA	NA
	Unigene5843_All	Unigene19171_All	YN	0.00253055	0.0238989	0.105886	0.00354952	1047	255.278	791.722	NA	8	6	2	NA	NA	0.00774054	1.9463:1.9463:1:1:1:1	0.456543(0.474212:0.454155:0.441261)	NA	NA	NA	NA
	Unigene19453_All	Unigene33252_All	YN	0.00116448	0.0110211	0.105659	0.0439914	1134	274.479	859.521	NA	4	3	1	NA	NA	0.00355023	2.25892:2.25892:1:1:1:1	0.453704(0.534392:0.383598:0.443122)	NA	NA	NA	NA
	Unigene16914_All	Unigene23384_All	YN	0.00216252	0.0204955	0.105512	0.00152125	1323	396.77	926.23	NA	10	8	2	NA	NA	0.00766061	10.6874:10.6874:1:1:1:1	0.467876(0.561224:0.426304:0.4161)	NA	NA	NA	NA
	Unigene37346_All	Unigene21706_All	YN	0.00200394	0.0189963	0.105491	0.0441619	660	160.229	499.771	NA	4	3	1	NA	NA	0.0061292	2:2:1:1:1:1	0.419591(0.449561:0.394737:0.414474)	NA	NA	NA	NA
	Unigene32469_All	Unigene17476_All	YN	0.00158274	0.0150403	0.105233	0.0436888	834	201.516	632.484	NA	4	3	1	NA	NA	0.00483443	2:2:1:1:1:1	0.427458(0.521583:0.417266:0.343525)	NA	NA	NA	NA
	Unigene19390_All	Unigene16501_All	YN	0.00141779	0.0134777	0.105195	0.00018274	2868	749.77	2118.23	NA	13	10	3	NA	NA	0.00457055	3.75527:3.75527:1:1:1:1	0.449616(0.529289:0.423117:0.396444)	NA	NA	NA	NA
	Unigene1182_All	Unigene3484_All	YN	0.00160428	0.0153384	0.104592	0.0432618	822	197.913	624.087	NA	4	3	1	NA	NA	0.00491106	2.36943:2.36943:1:1:1:1	0.444043(0.5:0.471119:0.361011)	NA	NA	NA	NA
	Unigene2654_All	Unigene22165_All	YN	0.00168316	0.0161114	0.10447	0.0430481	783	188.211	594.789	NA	4	3	1	NA	NA	0.00515129	2:2:1:1:1:1	0.442652(0.632616:0.435484:0.259857)	NA	NA	NA	NA
	Unigene37792_All	Unigene25996_All	YN	0.000877318	0.00839877	0.104458	0.0428834	1500	359.496	1140.5	NA	4	3	1	NA	NA	0.00267994	2.46537:2.46537:1:1:1:1	0.458667(0.576:0.45:0.35)	NA	NA	NA	NA
	Unigene29812_All	Unigene37747_All	YN	0.0020555	0.0196875	0.104406	0.0432924	642	154.748	487.252	NA	4	3	1	NA	NA	0.00630551	2:2:1:1:1:1	0.429078(0.568085:0.412766:0.306383)	NA	NA	NA	NA
	Unigene42755_All	Unigene38184_All	YN	0.00471869	0.0452912	0.104186	0.000283148	843	205.229	637.771	NA	12	9	3	NA	NA	0.0145961	2.26989:2.26989:1:1:1:1	0.461584(0.576241:0.446809:0.361702)	NA	NA	NA	NA
	Unigene8443_All	Unigene7039_All	YN	0.00237049	0.0227709	0.104102	0.00212121	1158	312.915	845.085	NA	9	7	2	NA	NA	0.0078831	3.48764:3.48764:1:1:1:1	0.462435(0.549223:0.415803:0.42228)	NA	NA	NA	NA
	Unigene45_All	Unigene35635_All	YN	0.00419984	0.0404828	0.103744	0.00329811	630	152.247	477.753	NA	8	6	2	NA	NA	0.0129681	2:2:1:1:1:1	0.457937(0.447619:0.435714:0.490476)	NA	NA	NA	NA
	Unigene19357_All	Unigene40486_All	YN	0.00180746	0.0174582	0.103531	0.00206691	1515	407.143	1107.86	NA	9	7	2	NA	NA	0.00601346	6.24853:6.24853:1:1:1:1	0.423762(0.512871:0.344554:0.413861)	NA	NA	NA	NA
	Unigene24805_All	Unigene1355_All	YN	0.00221725	0.0214228	0.1035	0.0425512	594	142.324	451.676	NA	4	3	1	NA	NA	0.00681894	2:2:1:1:1:1	0.422824(0.55665:0.29803:0.413793)	NA	NA	NA	NA
	Unigene2391_All	Unigene33463_All	YN	0.00191859	0.0185394	0.103487	0.0273124	741	219.022	521.978	NA	5	4	1	NA	NA	0.00683131	5.45143:5.45143:1:1:1:1	0.482165(0.468635:0.404059:0.573801)	NA	NA	NA	NA
	Unigene42345_All	Unigene22588_All	YN	0.0017325	0.0167482	0.103444	0.0421945	759	181.131	577.869	NA	4	3	1	NA	NA	0.00531591	2:2:1:1:1:1	0.416345(0.436293:0.391892:0.420849)	NA	NA	NA	NA
	Unigene6605_All	Unigene26088_All	YN	0.00374324	0.0361976	0.103411	0.000111461	1116	312.3	803.7	NA	14	11	3	NA	NA	0.0128252	3.61676:3.61676:1:1:1:1	0.462366(0.521505:0.477151:0.388441)	NA	NA	NA	NA
	Unigene28040_All	Unigene25556_All	YN	0.00146373	0.014235	0.102826	0.0417142	897	213.06	683.94	NA	4	3	1	NA	NA	0.00449724	2.51202:2.51202:1:1:1:1	0.431894(0.538206:0.42691:0.330565)	NA	NA	NA	NA
	Unigene29578_All	Unigene690_All	YN	0.00450158	0.043845	0.10267	2.77629e-05	1167	256.243	910.757	NA	15	10.9129	4.08711	NA	NA	0.0131404	1.98256:1.98256:1:1:1:1	0.441731(0.529563:0.419023:0.376607)	NA	NA	NA	NA
	Unigene42592_All	Unigene33695_All	YN	0.00478143	0.0466053	0.102594	0.000988697	621	201.336	419.664	NA	11	9	2	NA	NA	0.0183413	13.8965:13.8965:1:1:1:1	0.454911(0.514493:0.400966:0.449275)	NA	NA	NA	NA
	Unigene39281_All	Unigene33765_All	YN	0.00149746	0.0145965	0.10259	0.0414116	876	207.535	668.465	NA	4	3	1	NA	NA	0.00460078	2:2:1:1:1:1	0.468037(0.503425:0.474315:0.42637)	NA	NA	NA	NA
	Unigene27997_All	Unigene22254_All	YN	0.00348216	0.0339437	0.102586	7.47447e-07	1953	513.747	1439.25	NA	22	17	5	NA	NA	0.0114952	1.82329:1.82329:1:1:1:1	0.44825(0.47032:0.396499:0.47793)	NA	NA	NA	NA
	Unigene35348_All	Unigene22690_All	YN	0.00265718	0.0259771	0.10229	0.000249185	1485	353.96	1131.04	NA	12	9	3	NA	NA	0.00821564	2.46131:2.46131:1:1:1:1	0.429293(0.527273:0.419192:0.341414)	NA	NA	NA	NA
	Unigene24412_All	Unigene49553_All	YN	0.0053732	0.0525983	0.102155	0.000167038	759	198.671	560.329	NA	13	10	3	NA	NA	0.0177345	4.67814:4.67814:1:1:1:1	0.425422(0.490272:0.400778:0.385214)	NA	NA	NA	NA
	Unigene8880_All	Unigene34634_All	YN	0.00741518	0.0729595	0.101634	1.16813e-06	909	231.331	677.669	NA	21	16	5	NA	NA	0.0240955	1.99172:1.99172:1:1:1:1	0.426042(0.485938:0.384375:0.407813)	NA	NA	NA	NA
	Unigene19325_All	Unigene33779_All	YN	0.00538271	0.0530439	0.101477	5.59927e-05	942	195.682	746.318	NA	14	10	4	NA	NA	0.0152834	0.530639:0.530639:1:1:1:1	0.470276(0.562102:0.388535:0.460191)	NA	NA	NA	NA
	Unigene42726_All	Unigene31667_All	YN	0.00370224	0.0365584	0.101269	5.56744e-06	1506	391.108	1114.89	NA	18	13.8872	4.11276	NA	NA	0.012235	2.29686:2.29686:1:1:1:1	0.458913(0.552684:0.442346:0.38171)	NA	NA	NA	NA
	Unigene7618_All	Unigene23911_All	YN	0.00441998	0.0436661	0.101222	0.000395632	870	189.239	680.761	NA	11	8	3	NA	NA	0.0129566	2.23117:2.23117:1:1:1:1	0.44559(0.453608:0.474227:0.408935)	NA	NA	NA	NA
	Unigene7670_All	Unigene33834_All	YN	0.00399531	0.0394796	0.101199	0.00187135	684	182.079	501.921	NA	9	7	2	NA	NA	0.0134412	2:2:1:1:1:1	0.460159(0.488048:0.488048:0.404382)	NA	NA	NA	NA
	Unigene44318_All	Unigene16284_All	YN	0.00138779	0.0137324	0.101059	0.0402214	942	220.764	721.236	NA	4	3	1	NA	NA	0.00428083	1.98677:1.98677:1:1:1:1	0.510449(0.543887:0.454545:0.532915)	NA	NA	NA	NA
	Unigene6706_All	Unigene13810_All	YN	0.00228602	0.0226866	0.100765	0.00183901	1191	314.738	876.262	NA	9	7	2	NA	NA	0.00767714	3.26219:3.26219:1:1:1:1	0.459698(0.573048:0.403023:0.403023)	NA	NA	NA	NA
	Unigene29371_All	Unigene58677_All	YN	0.00389252	0.0386512	0.100709	0.00498009	648	132.859	515.141	NA	7	5	2	NA	NA	0.0110191	0.700536:0.700536:1:1:1:1	0.41358(0.444444:0.363426:0.43287)	NA	NA	NA	NA
	Unigene5510_All	Unigene19631_All	YN	0.0010925	0.0108699	0.100507	0.0395707	1194	277.997	916.003	NA	4	3	1	NA	NA	0.00336895	2:2:1:1:1:1	0.400335(0.451005:0.364322:0.385678)	NA	NA	NA	NA
	Unigene29777_All	Unigene29217_All	YN	0.00318444	0.0316867	0.100498	0.00179279	855	225.612	629.388	NA	9	7	2	NA	NA	0.0107055	2:2:1:1:1:1	0.450877(0.449123:0.466667:0.436842)	NA	NA	NA	NA
	Unigene14103_All	Unigene18203_All	YN	0.00262039	0.0260784	0.100481	0.000138941	1539	391.853	1147.15	NA	13	10	3	NA	NA	0.00859316	4.92364:4.92364:1:1:1:1	0.420728(0.499025:0.375244:0.387914)	NA	NA	NA	NA
	Unigene70937_All	Unigene51648_All	YN	0.00134478	0.0134703	0.0998326	0.0390862	969	224.717	744.283	NA	4	3	1	NA	NA	0.00415678	2:2:1:1:1:1	0.433044(0.49422:0.398844:0.406069)	NA	NA	NA	NA
	Unigene20506_All	Unigene40341_All	YN	0.00504677	0.0506145	0.0997101	1.0863e-05	1062	266.652	795.348	NA	17	13	4	NA	NA	0.0164881	2.17743:2.17743:1:1:1:1	0.454802(0.563559:0.430791:0.370056)	NA	NA	NA	NA
	Unigene20104_All	Unigene468_All	YN	0.00154267	0.0154891	0.0995972	0.000774768	1887	589.214	1297.79	NA	11	9	2	NA	NA	0.00589743	10.4062:10.4062:1:1:1:1	0.42037(0.476984:0.353968:0.430159)	NA	NA	NA	NA
	Unigene29833_All	Unigene14444_All	YN	0.0029871	0.0300159	0.0995173	1.3708e-06	2190	512.504	1677.5	NA	20	15	5	NA	NA	0.00931237	3.15048:3.15048:1:1:1:1	0.406224(0.486216:0.378446:0.35401)	NA	NA	NA	NA
	Unigene208_All	Unigene15341_All	YN	0.00111814	0.0112485	0.0994026	0.0387583	1164	268.987	895.013	NA	4	3	1	NA	NA	0.00345916	1.89023:1.89023:1:1:1:1	0.435137(0.475515:0.416237:0.41366)	NA	NA	NA	NA
	Unigene7107_All	Unigene18340_All	YN	0.00164709	0.016612	0.0991506	0.00266509	1581	365.2	1215.8	NA	8	6	2	NA	NA	0.00510387	2:2:1:1:1:1	0.420304(0.432638:0.434535:0.393738)	NA	NA	NA	NA
	Unigene19145_All	Unigene22608_All	YN	0.003334	0.0336669	0.0990292	0.000773331	876	274.786	601.214	NA	11	9	2	NA	NA	0.0128489	5.53236:5.53236:1:1:1:1	0.505137(0.577055:0.467466:0.47089)	NA	NA	NA	NA
	Unigene18782_All	Unigene14234_All	YN	0.00516437	0.0524168	0.0985252	0.000631391	723	139.821	583.179	NA	10	7	3	NA	NA	0.0143025	13.8073:13.8073:1:1:1:1	0.38388(0.483607:0.338115:0.329918)	NA	NA	NA	NA
	Unigene4328_All	Unigene66396_All	YN	0.00119889	0.0121998	0.0982712	0.0378771	1083	248.226	834.774	NA	4	3	1	NA	NA	0.00372032	2.64837:2.64837:1:1:1:1	0.441417(0.599455:0.39782:0.326975)	NA	NA	NA	NA
	Unigene24742_All	Unigene35255_All	YN	0.00172627	0.0175795	0.0981975	0.0379802	753	172.951	580.049	NA	4	3	1	NA	NA	0.00536749	2.31012:2.31012:1:1:1:1	0.430943(0.501992:0.368526:0.422311)	NA	NA	NA	NA
	Unigene30592_All	Unigene24601_All	YN	0.00197869	0.0201611	0.0981441	0.0378982	657	150.863	506.137	NA	4	3	1	NA	NA	0.00615381	2.35485:2.35485:1:1:1:1	0.416286(0.477169:0.415525:0.356164)	NA	NA	NA	NA
	Unigene37770_All	Unigene33721_All	YN	0.0010517	0.0107444	0.0978832	0.0374987	1233	281.489	951.511	NA	4	3	1	NA	NA	0.00326451	4.47881:4.47881:1:1:1:1	0.434307(0.526764:0.423358:0.352798)	NA	NA	NA	NA
	Unigene36198_All	Unigene2448_All	YN	0.00204244	0.0208884	0.0977785	0.0375902	636	145.629	490.371	NA	4	3	1	NA	NA	0.00635774	2:2:1:1:1:1	0.428459(0.514151:0.429245:0.341981)	NA	NA	NA	NA
	Unigene28268_All	Unigene58985_All	YN	0.00202351	0.0207097	0.0977086	0.0376927	642	147.143	494.857	NA	4	3	1	NA	NA	0.00630626	2.04132:2.04132:1:1:1:1	0.429907(0.514019:0.343458:0.432243)	NA	NA	NA	NA
	Unigene9940_All	Unigene34526_All	YN	0.000920288	0.00944458	0.0974409	0.0370488	1407	319.717	1087.28	NA	4	3	1	NA	NA	0.00285729	2:2:1:1:1:1	0.436745(0.511727:0.472281:0.326226)	NA	NA	NA	NA
	Unigene22244_All	Unigene22728_All	YN	0.00357206	0.0367248	0.0972656	0.000187196	1095	252.894	842.106	NA	12	9	3	NA	NA	0.0112288	3.62635:3.62635:1:1:1:1	0.427397(0.545205:0.393151:0.343836)	NA	NA	NA	NA
	Unigene23746_All	Unigene3659_All	YN	0.00188801	0.0194121	0.0972593	0.0371271	687	156.551	530.449	NA	4	3	1	NA	NA	0.00588134	2:2:1:1:1:1	0.454148(0.491266:0.388646:0.482533)	NA	NA	NA	NA
	Unigene14846_All	Unigene36990_All	YN	0.00100656	0.0103613	0.0971465	0.0229124	1383	388.853	994.147	NA	5	4	1	NA	NA	0.0036368	2:2:1:1:1:1	0.446132(0.486985:0.401302:0.450108)	NA	NA	NA	NA
	Unigene41864_All	Unigene39888_All	YN	0.00184613	0.0190078	0.097125	0.0231842	756	213.659	542.341	NA	5	4	1	NA	NA	0.00669631	4.3837:4.3837:1:1:1:1	0.452652(0.568182:0.371212:0.418561)	NA	NA	NA	NA
	Unigene41368_All	Unigene56806_All	YN	0.00393821	0.0407035	0.0967536	0.000300208	966	202.208	763.792	NA	11	8	3	NA	NA	0.0116341	1.10671:1.10671:1:1:1:1	0.448364(0.513804:0.444785:0.386503)	NA	NA	NA	NA
	Unigene19666_All	Unigene39072_All	YN	0.00644097	0.0667521	0.0964908	5.0449e-06	843	219.203	623.797	NA	18	14	4	NA	NA	0.0221235	3.86322:3.86322:1:1:1:1	0.45433(0.55694:0.38968:0.41637)	NA	NA	NA	NA
	Unigene39863_All	Unigene16463_All	YN	0.00107599	0.0111956	0.0961081	0.000609901	1290	359.956	930.044	NA	5	4	1	NA	NA	0.00389973	2:2:1:1:1:1	0.487984(0.552326:0.476744:0.434884)	NA	NA	NA	NA
	Unigene27189_All	Unigene32540_All	YN	0.00318961	0.0332318	0.0959807	0.00236091	813	184.58	628.42	NA	8	6	2	NA	NA	0.0100102	2:2:1:1:1:1	0.424354(0.464945:0.381919:0.426199)	NA	NA	NA	NA
	Unigene19130_All	Unigene31510_All	YN	0.00123374	0.0128591	0.0959425	0.022205	1125	313.788	811.212	NA	5	4	1	NA	NA	0.00447632	2:2:1:1:1:1	0.473778(0.477333:0.441333:0.502667)	NA	NA	NA	NA
	Unigene9963_All	Unigene26882_All	YN	0.00275746	0.0287493	0.0959139	5.47456e-06	1773	319.606	1453.39	NA	13	9	4	NA	NA	0.00744282	0.552666:0.552666:1:1:1:1	0.41991(0.463621:0.389171:0.406937)	NA	NA	NA	NA
	Unigene3607_All	Unigene26331_All	YN	0.00256986	0.0268111	0.0958508	0.00235655	1008	228.362	779.638	NA	8	6	2	NA	NA	0.00806171	2.19098:2.19098:1:1:1:1	0.412381(0.49:0.378571:0.368571)	NA	NA	NA	NA
	Unigene27213_All	Unigene37982_All	YN	0.00207367	0.0216343	0.0958507	0.0362127	624	140.974	483.026	NA	4	3	1	NA	NA	0.00649282	2:2:1:1:1:1	0.466346(0.466346:0.483173:0.449519)	NA	NA	NA	NA
	Unigene22989_All	Unigene26853_All	YN	0.00287048	0.0300018	0.0956771	1.96188e-06	1944	547.73	1396.27	NA	20	16	4	NA	NA	0.0105148	4.89198:4.89198:1:1:1:1	0.473765(0.553241:0.436728:0.431327)	NA	NA	NA	NA
	Unigene33971_All	Unigene38856_All	YN	0.00282009	0.0294923	0.0956211	0.000159173	1377	311.203	1065.8	NA	12	9	3	NA	NA	0.00884804	2:2:1:1:1:1	0.432825(0.550109:0.405229:0.343137)	NA	NA	NA	NA
	Unigene25057_All	Unigene38239_All	YN	0.00136549	0.0142896	0.0955587	0.0356663	945	211.997	733.003	NA	4	3	1	NA	NA	0.00426481	1.20544:1.20544:1:1:1:1	0.455556(0.503175:0.469841:0.393651)	NA	NA	NA	NA
	Unigene25789_All	Unigene17119_All	YN	0.00350993	0.0367418	0.0955296	9.94946e-05	1137	280.022	856.978	NA	13	10	3	NA	NA	0.0116943	1.9162:1.9162:1:1:1:1	0.434679(0.491686:0.426366:0.385986)	NA	NA	NA	NA
	Unigene16420_All	Unigene36628_All	YN	0.00107611	0.0112915	0.0953021	0.000592472	1287	357.058	929.942	NA	5	4	1	NA	NA	0.00391021	2:2:1:1:1:1	0.445428(0.490044:0.396018:0.450221)	NA	NA	NA	NA
	Unigene13605_All	Unigene36792_All	YN	0.00233997	0.0245871	0.0951707	0.0221386	594	165.978	428.022	NA	5	4	1	NA	NA	0.00855636	5.70537:5.70537:1:1:1:1	0.464286(0.633333:0.42381:0.335714)	NA	NA	NA	NA
	Unigene9572_All	Unigene33492_All	YN	0.00203872	0.0214563	0.0950173	0.0353997	633	141.829	491.171	NA	4	3	1	NA	NA	0.00638938	2:2:1:1:1:1	0.41037(0.517778:0.257778:0.455556)	NA	NA	NA	NA
	Unigene18835_All	Unigene14169_All	YN	0.00355006	0.0374881	0.0946983	0.00225182	729	164.296	564.704	NA	8	6	2	NA	NA	0.0111987	0.721845:0.721845:1:1:1:1	0.484973(0.547131:0.495902:0.411885)	NA	NA	NA	NA
	Unigene19244_All	Unigene8979_All	YN	0.00165806	0.0175334	0.0945655	0.0349303	777	173.11	603.89	NA	4	3	1	NA	NA	0.00519496	2:2:1:1:1:1	0.489704(0.656371:0.382239:0.430502)	NA	NA	NA	NA
	Unigene19283_All	Unigene35171_All	YN	0.00256075	0.0271259	0.0944023	0.00219455	1008	225.47	782.53	NA	8	6	2	NA	NA	0.00805549	0.765388:0.765388:1:1:1:1	0.457341(0.553571:0.40625:0.412202)	NA	NA	NA	NA
[truncated: 861 more rows]
